# Supplementary material for: Single-PanIN-seq Unveils that ARID1A Deficiency Promotes Pancreatic Tumorigenesis by Attenuating KRAS Induced Senescence
Source: bioRxiv preprint, doi:10.1101/2020.10.30.361972, version 1 (2020-10-30)
Supplement: Supplemental Table 2 [file 361972_file10.xlsx]

## Sheet: ARID1A_KO_clone2_vs_WT_KRAS
Name	logFC	unshrunk.logFC	logCPM	PValue	FDR
ALDH1A1	3.25977	3.26123	7.30556	1.2561e-33	1.4724e-29
RSPO4	-4.95918	-4.97006	5.31645	3.59849e-27	2.10908e-23
CXCL8	-1.89622	-1.89653	7.24809	3.9586e-26	1.54676e-22
IGFBP5	4.43252	4.45013	4.78132	1.8703e-22	4.61212e-19
SULF1	2.22366	2.22511	6.52976	1.96729e-22	4.61212e-19
TERT	1.30428	1.30433	10.0668	4.67533e-22	9.13403e-19
CCL2	-3.27779	-3.28319	5.18133	1.80967e-20	3.03042e-17
CRISP3	1.55962	1.55996	6.44698	5.23594e-19	7.67197e-16
NES	2.99069	2.99879	5.54924	6.37273e-19	8.30013e-16
PAGE1	3.05796	3.06372	4.84984	1.02533e-18	1.20189e-15
SERPING1	1.42755	1.42794	6.68525	1.86672e-18	1.98924e-15
IFI44L	-3.36155	-3.36805	4.19075	2.3295e-18	2.27553e-15
ANTXR2	-1.11817	-1.11826	7.992	8.57545e-18	7.73242e-15
IFI6	-1.26173	-1.26187	7.38733	9.46581e-18	7.92559e-15
NAA16	0.96353	0.963555	10.1553	2.08693e-17	1.63087e-14
MMP1	-2.65487	-2.66787	8.9089	6.50195e-17	4.76349e-14
AKAP12	0.953874	0.953906	9.88513	8.10233e-17	5.5868e-14
NRK	-7.07116	-7.58426	4.13782	9.15802e-17	5.96391e-14
IGFBP6	1.54404	1.54473	6.60772	4.4888e-16	2.76935e-13
IGFBP2	3.56678	3.5786	3.62562	6.213e-16	3.47727e-13
TAGLN	1.09859	1.09877	7.65144	6.22953e-16	3.47727e-13
OAS2	-3.60609	-3.61994	3.3672	1.14104e-15	6.07966e-13
MAGEA3	-4.70348	-4.75239	3.4487	5.04251e-15	2.56993e-12
RTN1	3.09234	3.10523	4.21537	4.80031e-14	2.34455e-11
LTBP3	1.15238	1.15256	7.30471	9.04575e-14	4.24137e-11
ESM1	1.48305	1.48387	5.70793	9.96246e-14	4.49154e-11
KHDRBS2	3.01924	3.02826	3.47255	2.90454e-13	1.261e-10
GABBR2	2.31846	2.3279	5.43802	1.4773e-12	6.18461e-10
IFI27	-1.86928	-1.87103	4.4787	1.64472e-12	6.64809e-10
CD4	-1.95627	-1.95877	4.51838	4.14411e-12	1.61924e-09
IFITM1	-1.60406	-1.60502	5.08192	4.42118e-12	1.63128e-09
IL7R	-4.0616	-4.13277	4.08009	4.45325e-12	1.63128e-09
ITPR1	1.03699	1.03717	6.71043	4.62696e-12	1.64355e-09
SSTR1	0.909595	0.909716	7.03386	5.07291e-12	1.74896e-09
GREM1	-0.719728	-0.719744	10.6296	6.21888e-12	2.08279e-09
HAS2	-1.41329	-1.415	6.11391	1.00183e-11	3.26207e-09
S100A10	-1.21605	-1.21721	6.57339	1.25169e-11	3.96548e-09
HHIP	1.47433	1.47716	7.05648	2.10371e-11	6.48938e-09
E2F7	-1.21178	-1.2128	6.40165	2.75112e-11	8.26889e-09
NRCAM	0.991161	0.991402	6.34733	3.46456e-11	1.01529e-08
PTGER2	1.35228	1.35352	5.3157	5.51363e-11	1.57636e-08
PAGE3	-7.86797	-1.44269e+08	2.13553	7.62966e-11	2.1294e-08
TGM2	0.705057	0.705108	9.31547	9.0074e-11	2.45546e-08
OAS3	-1.48806	-1.48951	4.54243	3.64616e-10	9.71369e-08
OFCC1	7.89388	1.44269e+08	1.88528	4.80945e-10	1.24327e-07
G0S2	3.23938	3.28033	3.80462	4.87892e-10	1.24327e-07
CD248	0.835269	0.835423	7.63036	7.39445e-10	1.84421e-07
LUM	-1.1788	-1.17921	5.95346	7.67584e-10	1.8745e-07
APCDD1L	-3.12145	-3.14868	3.61254	8.44815e-10	2.021e-07
LINC02506	6.14564	6.61121	1.74613	1.10238e-09	2.58443e-07
MX1	-1.06566	-1.06604	5.6697	1.60621e-09	3.69177e-07
MT-RNR2	-0.696517	-0.69652	12.0031	2.24944e-09	5.07075e-07
PLAT	0.614919	0.614929	10.6172	2.52139e-09	5.57655e-07
SAA1	-3.05603	-3.0818	2.85068	2.57886e-09	5.59804e-07
POSTN	3.2564	3.28112	2.49902	2.62884e-09	5.60278e-07
RNU6-1	1.05353	1.05401	5.82608	2.92065e-09	6.11355e-07
DYSF	-1.9235	-1.92708	3.65917	3.4689e-09	7.13376e-07
MAPK10	-2.79068	-2.80389	3.14373	4.10631e-09	8.29899e-07
SYNPO2	0.875325	0.875496	6.59675	4.20738e-09	8.35914e-07
IFIT1	-1.77372	-1.77618	4.07217	6.60255e-09	1.28992e-06
SLITRK5	3.03028	3.0505	2.44184	8.09659e-09	1.55587e-06
LINC01085	1.47415	1.47764	5.34489	1.20826e-08	2.28438e-06
ISG15	-0.970705	-0.970924	6.48903	1.26604e-08	2.35564e-06
MYH10	1.08339	1.08428	5.62752	1.75722e-08	3.21846e-06
RNF207	1.65413	1.65782	4.06695	1.8222e-08	3.28613e-06
SAMHD1	-0.889061	-0.889396	6.03407	2.14997e-08	3.81847e-06
ZNF711	5.02793	5.27555	1.6961	2.44851e-08	4.28379e-06
FEZ1	-1.61471	-1.61668	4.24771	2.61566e-08	4.50894e-06
APOL1	-1.02339	-1.02401	5.39594	3.53664e-08	6.00819e-06
NOG	1.39425	1.39579	4.67627	4.02383e-08	6.7382e-06
NT5E	-0.609463	-0.609487	9.78058	5.51433e-08	9.10408e-06
PPP1R14A	1.90529	1.90946	3.87211	6.60801e-08	1.07582e-05
SPARC	-0.574273	-0.574285	10.2893	6.74871e-08	1.08368e-05
CD55	-0.615771	-0.615805	8.33134	6.847e-08	1.0846e-05
FTL	-0.585276	-0.585288	10.4229	8.82312e-08	1.37899e-05
KIAA1324L	-4.08199	-4.19436	1.57733	9.47644e-08	1.46162e-05
GPRC5A	1.55067	1.55337	4.26552	1.12983e-07	1.71998e-05
SEL1L3	-1.0474	-1.048	5.10133	1.18232e-07	1.77682e-05
MN1	2.14179	2.16319	4.56198	1.32757e-07	1.96984e-05
THSD4	0.967291	0.967914	5.5678	1.55972e-07	2.28538e-05
HERC6	-1.08813	-1.08895	4.93425	2.2592e-07	3.26943e-05
FAM133A	-1.73421	-1.73862	3.83931	2.38587e-07	3.41063e-05
TFAP2A	3.8752	3.97549	1.73888	2.42382e-07	3.42313e-05
RNF157	3.30067	3.35526	2.08153	2.57629e-07	3.59515e-05
H2AFY2	-5.37772	-5.8836	1.00035	2.73773e-07	3.77549e-05
DDX58	-1.04839	-1.0493	4.95741	3.71949e-07	5.06975e-05
ZNF503	1.07924	1.08069	5.38046	3.769e-07	5.07819e-05
FRG1BP	-1.23754	-1.23881	4.36361	3.95442e-07	5.26747e-05
KDELR3	-0.744211	-0.744401	6.81708	4.03758e-07	5.31782e-05
SERINC2	-1.15069	-1.15218	5.23449	4.57139e-07	5.95398e-05
ECI1	1.00598	1.00686	5.15441	5.56576e-07	7.16943e-05
CDKN1A	-0.536719	-0.536729	10.0134	6.1378e-07	7.82036e-05
EDNRB	2.50462	2.52286	2.51551	7.2116e-07	9.08972e-05
BST2	-1.61081	-1.61391	3.39074	7.56192e-07	9.28522e-05
OAF	-1.1635	-1.16458	4.42057	7.58894e-07	9.28522e-05
EVL	5.12347	5.58322	1.3606	7.60434e-07	9.28522e-05
STAT1	-0.584475	-0.584521	8.28462	7.79691e-07	9.42221e-05
ECHDC2	-4.27223	-4.45624	0.969052	8.66731e-07	0.000103672
GPX3	-1.20236	-1.20392	4.29565	8.76524e-07	0.000103784
CBS	0.959758	0.960225	5.24161	9.5139e-07	0.000111522
HIF3A	-6.94667	-1.44269e+08	0.941328	9.9381e-07	0.000115341
NRP1	0.658089	0.658236	8.10862	1.00383e-06	0.000115361
LMAN1	-0.548898	-0.548923	9.06435	1.27608e-06	0.000145225
RCN3	-0.664878	-0.664964	7.80446	1.36634e-06	0.000154002
CPE	-1.11843	-1.11959	4.32076	1.44902e-06	0.000161655
USP18	-2.32865	-2.34366	2.39555	1.46182e-06	0.000161655
HEXB	-0.590362	-0.590433	7.8115	1.85396e-06	0.000203104
SEMA3C	-0.665	-0.665127	7.1657	2.07264e-06	0.000224958
TRIM9	-4.25976	-4.44366	0.796129	2.09594e-06	0.0002254
FXYD5	-0.70799	-0.708185	6.67739	2.21829e-06	0.000236389
PRICKLE3	-6.63624	-1.44269e+08	0.54532	2.24516e-06	0.000237097
MYEOV	1.57005	1.57862	4.54799	2.4344e-06	0.000254786
DHRS3	2.21488	2.22892	2.54949	2.70538e-06	0.000279049
ARHGAP29	-0.679092	-0.679346	7.06493	2.71384e-06	0.000279049
CDH10	-2.36019	-2.37733	2.36843	2.82335e-06	0.000287785
TRIM55	-1.84663	-1.85251	2.7997	3.18969e-06	0.000322324
YOD1	2.89248	2.93213	2.24054	3.6258e-06	0.000363262
MX2	-2.06016	-2.07037	2.34895	3.89696e-06	0.00038712
OAS1	-1.91706	-1.92419	2.60633	3.99083e-06	0.000393114
FLNA	0.49926	0.499267	11.6726	4.30873e-06	0.000420891
GFPT2	-1.08166	-1.08328	4.52665	4.66118e-06	0.000451556
TMPRSS11E	-0.706781	-0.706938	6.1701	4.76263e-06	0.000455603
B3GALT2	1.11301	1.11409	4.25262	4.80996e-06	0.000455603
IRF7	-1.11921	-1.12043	4.17222	4.81955e-06	0.000455603
ALDH3B1	0.794828	0.795203	5.99556	6.82789e-06	0.000640292
COL18A1	0.801487	0.801818	6.29756	7.26862e-06	0.000676213
SORT1	0.871792	0.872498	5.72365	7.48586e-06	0.000690939
IFI44	-0.73167	-0.731906	5.84973	8.71086e-06	0.000797724
FGF5	-0.633792	-0.633978	7.35256	8.89071e-06	0.000807883
LRRC15	-2.58099	-2.61507	1.9381	8.99821e-06	0.000811361
CNTN1	-3.20906	-3.28604	1.75412	1.01297e-05	0.000894528
MAGEC2	-0.953756	-0.954991	4.97267	1.01384e-05	0.000894528
SRGN	-0.52701	-0.527035	9.18643	1.01495e-05	0.000894528
FOXF1	-1.87252	-1.88085	3.04603	1.03255e-05	0.00090325
ITGA11	-0.542765	-0.542816	8.47342	1.06218e-05	0.000922284
C16orf45	-1.13454	-1.13644	4.25085	1.10591e-05	0.000953199
MFAP5	-1.39371	-1.39903	4.02804	1.11761e-05	0.000956252
ARLNC1	-3.14906	-3.21632	1.20056	1.14594e-05	0.000973381
CLU	0.725891	0.726078	6.01679	1.17078e-05	0.000987331
IL24	-2.46263	-2.48285	2.149	1.38126e-05	0.00115651
IFIT3	-0.805152	-0.805622	5.31704	1.40082e-05	0.00116457
IFIH1	-0.896285	-0.8969	4.77072	1.46646e-05	0.00121055
FKBP7	-0.845558	-0.846074	5.29311	1.51551e-05	0.0012423
PARP14	-0.62627	-0.626393	6.77334	1.66882e-05	0.00135846
MBP	-3.35417	-3.44465	1.54066	1.72586e-05	0.00139521
PGGHG	0.840429	0.840859	5.49753	1.79195e-05	0.00143872
BMP6	2.22566	2.26497	4.41767	2.05337e-05	0.00163739
SLC16A14	1.68211	1.68932	3.69553	2.08602e-05	0.00165219
ADM2	-1.30442	-1.30663	3.48672	2.25745e-05	0.00177596
VSIR	0.785098	0.78552	5.3205	2.36116e-05	0.00184517
TNS3	-0.869332	-0.870175	5.45122	2.44217e-05	0.00189584
IFITM2	-0.54701	-0.547046	8.17664	2.56803e-05	0.00198043
CACNA1C	0.820717	0.821236	5.17467	2.70822e-05	0.00207489
XAF1	-0.839746	-0.840238	5.11637	2.76363e-05	0.00210359
IL1B	1.2051	1.2067	3.93007	3.12116e-05	0.0023604
COL6A3	0.465276	0.465284	11.8081	3.46826e-05	0.00260609
ASS1	-2.07007	-2.08033	2.27254	3.58541e-05	0.00267695
SQSTM1	-0.538109	-0.53816	8.01571	3.98207e-05	0.00295429
HELZ2	-0.612323	-0.612421	6.91341	4.0575e-05	0.00299132
PRRX2	2.74871	2.84064	3.19905	4.36238e-05	0.00319599
INHBA	-0.509735	-0.509787	8.94804	4.52987e-05	0.00329808
HSPA2	0.985904	0.987499	4.35277	5.48289e-05	0.00396731
KRT18	0.561952	0.562109	7.42519	5.66408e-05	0.00407327
NETO2	0.784476	0.785368	5.57416	5.81014e-05	0.00415283
SEMA6D	0.714615	0.715096	6.10299	5.87332e-05	0.00417255
FTH1	-0.520222	-0.520269	8.56098	6.16359e-05	0.00435238
SYNGR2	-0.677328	-0.677527	5.99167	6.47149e-05	0.00450864
CNN1	1.62319	1.63134	2.93163	6.49778e-05	0.00450864
LAMB3	0.860158	0.861133	5.76834	6.50026e-05	0.00450864
MT-RNR1	-0.549659	-0.549681	9.03113	6.86069e-05	0.00473065
DDX60	-0.756385	-0.756782	5.31016	6.92025e-05	0.00474381
QPCT	-2.54587	-2.57767	1.46191	7.1044e-05	0.00484173
PLSCR1	-0.700444	-0.700705	5.94461	7.48169e-05	0.00504384
ATP8B1	-0.649445	-0.649739	6.77274	7.48702e-05	0.00504384
PDLIM7	0.579464	0.579593	7.15644	8.10185e-05	0.00542685
KCNJ8	-1.57828	-1.58576	3.0284	8.20263e-05	0.00546314
PLAUR	-0.569346	-0.569465	7.0919	9.61199e-05	0.00636564
GOLGA8A	0.793953	0.794617	5.14634	9.83413e-05	0.00647616
PATJ	1.23777	1.24118	3.37128	0.000100722	0.00659585
PABPC1L	0.723134	0.723557	5.44391	0.0001096	0.00713738
MYOM2	-1.30362	-1.30669	3.02649	0.000110689	0.00716847
ATP6AP1	-0.56054	-0.560654	6.97692	0.000116162	0.00744826
QSOX1	-0.477155	-0.477165	10.0813	0.00011628	0.00744826
CALD1	0.448405	0.448413	10.6161	0.000127427	0.00809007
TNC	-0.594762	-0.594896	6.198	0.00012768	0.00809007
SYNM	0.703678	0.703974	5.51833	0.000129376	0.00815348
MGLL	-0.489271	-0.489322	8.40869	0.000135184	0.00846536
GDF15	-0.530776	-0.530829	7.32153	0.000135769	0.00846536
EIF2AK2	-0.53347	-0.533536	7.58699	0.000138743	0.00860498
HTRA1	0.489937	0.489994	8.22379	0.000142158	0.00877038
LY6E	-0.527586	-0.527657	7.27373	0.000148129	0.00909093
JAM3	-0.99832	-1.00044	4.14024	0.000150385	0.00915289
PATZ1	1.00823	1.01062	4.24661	0.0001507	0.00915289
EFS	2.73258	2.79866	1.19563	0.000153573	0.0092793
ABCC9	-1.13447	-1.13703	3.77908	0.000158559	0.00953144
PTMS	0.560096	0.56015	8.72143	0.000169645	0.0101458
MARCKSL1	2.57886	2.64371	2.4858	0.000186461	0.0110949
LMOD1	1.89459	1.90859	2.02334	0.000189177	0.0111996
L3MBTL1	1.83455	1.84743	2.23405	0.000190518	0.0112224
KCNJ6	1.18948	1.19353	3.76166	0.000204095	0.011962
SLC41A2	-1.05396	-1.05595	3.88185	0.000217394	0.0126781
FLNB	0.466046	0.466063	9.06192	0.000225802	0.013013
SCUBE3	0.731282	0.732082	6.06317	0.00022621	0.013013
ANXA11	0.506473	0.50655	7.79574	0.000226467	0.013013
GRIA3	0.580966	0.581086	6.29422	0.00022763	0.013016
LOXL3	-0.55832	-0.558446	6.98412	0.000241385	0.0137355
PHF14	0.832106	0.833314	4.7589	0.000242798	0.0137491
COL10A1	-1.7147	-1.72405	2.06224	0.00024702	0.013921
KIF21A	-0.717162	-0.717614	5.13334	0.000256483	0.0143851
GPR68	-2.23142	-2.26853	1.82748	0.000262001	0.0146247
OASL	-2.53743	-2.58339	0.922361	0.000282195	0.0156772
MCTP1	-2.28737	-2.31793	1.51273	0.000284689	0.0157412
CYP51A1	1.04814	1.05168	3.93167	0.000287232	0.0157578
SOAT1	-0.605841	-0.606153	6.20662	0.000287679	0.0157578
NMNAT2	1.08063	1.085	4.76498	0.000297399	0.0161431
P4HA1	-0.480761	-0.480816	7.76479	0.000297467	0.0161431
RPSAP52	-2.34527	-2.4261	3.4411	0.000301752	0.0163002
HEYL	1.89622	1.90818	1.98275	0.000309302	0.0166314
CTXN1	2.53071	2.60561	1.84893	0.000316807	0.0169572
CCDC188	1.75622	1.76923	2.3833	0.000341403	0.0181862
CTSF	0.990795	0.992728	3.79507	0.000342872	0.0181862
ADARB1	0.634461	0.634848	5.8972	0.000354645	0.0187259
PLEC	0.482185	0.48219	11.3821	0.000359629	0.0189039
TNFAIP6	-2.78932	-2.86324	0.746246	0.000363136	0.019003
PLOD2	-0.440599	-0.440618	9.51476	0.000365153	0.0190237
MYH9	0.451792	0.451796	12.0911	0.000374012	0.019399
PPIF	-0.465373	-0.465409	8.02281	0.000390094	0.020144
TMEM132B	2.03448	2.06056	1.93606	0.000397092	0.0204154
F3	-0.782739	-0.783762	5.39573	0.000424598	0.0217342
KREMEN1	1.0481	1.05073	3.64977	0.000426563	0.0217399
CYGB	0.634402	0.634749	5.63052	0.000447316	0.0226989
AHSA2P	0.55388	0.554049	6.33982	0.000457077	0.0230942
ITGA5	-0.435521	-0.435539	9.28068	0.00046332	0.0233092
PKP3	1.05166	1.05366	3.87969	0.000465575	0.0233225
CPED1	-0.561253	-0.561485	6.51402	0.000469318	0.02341
RARB	2.11469	2.14298	1.65331	0.000481339	0.0239079
MYPN	0.664411	0.665167	5.80655	0.000484105	0.0239438
WDR91	-1.12435	-1.12834	3.44116	0.000489971	0.0241321
ALDH5A1	0.765766	0.766402	4.59622	0.000516866	0.0253502
EGFL7	-1.41201	-1.41738	2.65777	0.000523971	0.0255916
NPTX1	0.715888	0.717733	9.18224	0.000544122	0.0264655
VEPH1	-0.586071	-0.586398	6.14471	0.000548084	0.0265481
VCAN	0.593672	0.594089	7.30542	0.000559134	0.0269719
MT-ND4	-0.647372	-0.647377	12.0016	0.000562706	0.0270329
RFLNB	0.57036	0.570619	6.17298	0.000567031	0.0271077
INSC	0.818512	0.819845	4.82012	0.000568887	0.0271077
RIDA	-0.90163	-0.903318	3.96742	0.000575576	0.0273154
MT-ND1	-0.623386	-0.623401	10.1059	0.000582143	0.0274825
EXT2	-0.493052	-0.493138	7.29112	0.000583787	0.0274825
SUSD5	1.36219	1.36943	2.79189	0.000600481	0.0281554
MYBL2	1.6198	1.64461	4.71387	0.000610832	0.0285266
EMC10	-0.68781	-0.688297	5.10549	0.000616756	0.0286889
P3H2	1.15706	1.16029	3.1466	0.000632769	0.0293175
NRXN3	-0.772505	-0.77322	4.36597	0.000659697	0.0302781
IFIT2	-1.17608	-1.18035	3.03308	0.00066014	0.0302781
SPTLC3	-1.22266	-1.22698	3.30171	0.000661252	0.0302781
ERAP1	-0.575721	-0.575955	6.05937	0.000666401	0.0303877
PROCR	-0.679056	-0.679508	5.26034	0.00066883	0.0303877
P4HA2	-0.478473	-0.478539	7.46471	0.00068543	0.0309969
MAGEB6	-1.67495	-1.68366	2.08036	0.000689507	0.0309969
MLPH	0.591959	0.592204	6.26135	0.000690171	0.0309969
MATN2	-1.53643	-1.54633	2.27338	0.000711885	0.0318501
SCNN1D	1.41728	1.4235	2.79027	0.000732693	0.0324724
DCN	-0.444632	-0.444668	9.19094	0.000733107	0.0324724
ABHD3	-0.958673	-0.96032	3.97726	0.000736534	0.0324724
CYB561D2	-1.06587	-1.06904	3.51022	0.000736876	0.0324724
CDIP1	1.68799	1.70119	2.1656	0.000741468	0.0325331
RPS28P7	0.85737	0.858807	4.15777	0.000743804	0.0325331
SERPINE2	-0.775732	-0.776492	4.62833	0.000751548	0.0327496
STS	-0.619476	-0.619762	5.71737	0.000785301	0.0340937
SAAL1	-0.937521	-0.940217	3.99823	0.000801964	0.0346887
ATP8A1	-1.09498	-1.09815	3.23692	0.000815615	0.0351494
ZC3H12C	-0.720021	-0.72082	4.84327	0.000837797	0.0359731
FZD7	0.618016	0.618471	5.54751	0.000874532	0.0374134
MYO1E	0.517403	0.517541	6.84748	0.000891735	0.0380106
LINC02407	-1.2009	-1.20577	3.07851	0.00091648	0.0389238
CSPG4	-0.546778	-0.547109	6.89131	0.000921043	0.0389764
CCDC86	0.732001	0.733064	4.89949	0.000948436	0.0399913
OCIAD2	-0.848019	-0.849366	4.12107	0.000954076	0.0400849
FAM238B	1.71044	1.72371	1.66486	0.000960481	0.0402099
EDIL3	-0.562836	-0.563044	6.48678	0.000983184	0.0410138
IFI35	-0.787298	-0.788152	4.49438	0.00100808	0.0419034
DNASE2	-0.631242	-0.631642	5.27211	0.00101653	0.0421053
CHST2	-0.43932	-0.439346	8.81908	0.0010898	0.0449812
NEDD9	0.752281	0.753764	5.45353	0.00111976	0.0460555
CD274	-1.06018	-1.06297	3.33795	0.00114412	0.0468917
PPIB	-0.475656	-0.475749	7.10135	0.00114809	0.0468917
TUBA1C	-0.484704	-0.484854	7.53762	0.00118653	0.0482935
ORC3	-0.773843	-0.77513	4.61688	0.00121106	0.0491214
ZNF300	-1.17506	-1.18133	3.15375	0.00123276	0.0498289
EHBP1L1	0.509032	0.509177	6.92778	0.00124716	0.0502377
ATP6V0B	-0.542143	-0.542321	6.38417	0.00127866	0.0513304
COL4A6	0.913931	0.916943	4.33673	0.00130021	0.0520173
RORA	1.20232	1.20709	3.04268	0.00130638	0.0520862
MAP2K3	-0.528375	-0.528571	6.34104	0.00134132	0.0532196
DTNA	-0.889535	-0.891177	3.83206	0.00134388	0.0532196
CD47	-0.487163	-0.487267	7.03587	0.00134882	0.0532354
PISD	0.539456	0.539628	6.21149	0.00136128	0.0535466
PCDHB6	-1.89721	-1.92221	1.53633	0.00141904	0.0556319
DTX3L	-0.49505	-0.495171	6.5445	0.00143358	0.0560147
SNCAIP	-1.99655	-2.04233	2.36367	0.00144025	0.0560882
KIAA1147	-0.946016	-0.94873	3.53164	0.00151815	0.0585283
SLC8A1	0.741747	0.743418	5.1211	0.00151986	0.0585283
NRIP1	0.548244	0.548504	6.1065	0.00152481	0.0585283
LCE2A	0.617611	0.618062	6.30892	0.0015263	0.0585283
GABBR1	0.815157	0.81647	4.25122	0.00152787	0.0585283
EFHD1	0.783741	0.784895	4.08963	0.00155816	0.0594945
PITPNC1	0.990507	0.992832	3.86802	0.00158226	0.0602183
SPSB1	-0.856759	-0.858832	4.22281	0.00159336	0.0604447
EPHB4	0.79255	0.793598	4.63942	0.00160981	0.0605926
POPDC3	-0.715215	-0.716138	4.75143	0.00161238	0.0605926
SIX4	-0.684915	-0.685545	4.79598	0.00161277	0.0605926
ARID1A	-0.482057	-0.482187	6.89813	0.00164484	0.0616002
FOXL2NB	2.12826	2.16371	1.41368	0.00170984	0.0638304
COL1A1	0.43795	0.437971	10.6417	0.00176278	0.0655978
FKBP11	-0.535668	-0.535858	6.09445	0.00177864	0.0659785
HRH1	-1.21414	-1.21849	2.80658	0.00178726	0.0660891
HAS1	1.43519	1.44374	1.99932	0.00181373	0.0667545
SSBP4	0.650148	0.650654	5.38961	0.00182097	0.0667545
2020-09-05	0.653379	0.653999	4.92862	0.00182234	0.0667545
SLCO3A1	2.58391	2.67406	1.42077	0.00184393	0.067335
HSD17B10	0.732254	0.733226	4.8391	0.00186449	0.0678745
NINL	0.799659	0.800772	4.19629	0.00188027	0.0682369
RRAD	-1.96593	-1.99453	0.99556	0.00192248	0.0695533
PCLAF	-1.28548	-1.30064	4.42831	0.00194377	0.0701072
ATXN7L2	1.4427	1.45246	2.35918	0.00195932	0.0704513
CPEB2	0.476337	0.47643	7.41453	0.00201984	0.0724056
PTGS2	-0.633044	-0.633455	4.8333	0.00203324	0.0724907
FST	-1.14452	-1.15017	3.41235	0.00203459	0.0724907
WDR34	0.739652	0.741145	5.00735	0.00204229	0.0725447
POLR1E	0.667492	0.668321	4.98298	0.00205691	0.0728432
RNF128	-1.19083	-1.19483	2.58238	0.00207235	0.0731691
AMIGO2	-0.659915	-0.660627	5.14414	0.00213307	0.0750867
MYO18A	1.05872	1.06222	3.52532	0.00217508	0.0763361
FBXL7	-0.754954	-0.756211	4.47257	0.00220734	0.077237
TBX2-AS1	1.77358	1.80365	2.23582	0.00224272	0.0782414
CSRNP1	-0.61068	-0.611044	5.30375	0.00231621	0.0805657
MT-TP	-1.16767	-1.17313	2.81132	0.00233814	0.0808618
B3GNT5	-1.00888	-1.01273	3.52982	0.00235079	0.0808618
PLPBP	-0.603246	-0.603728	5.25426	0.00235111	0.0808618
DAZAP2	-0.485673	-0.485804	6.87194	0.00235232	0.0808618
TTLL7	-0.569516	-0.569912	5.78024	0.00238329	0.0815592
TMEM59	-0.442016	-0.442071	7.61858	0.00238652	0.0815592
MGAT4C	2.15231	2.19486	0.8086	0.00241347	0.0822405
TMEM154	-0.796268	-0.797817	4.71759	0.00242425	0.0823683
PDIA4	-0.432521	-0.432604	8.06185	0.00244514	0.0827321
ZC3H12A	-0.740115	-0.740779	4.45448	0.00244907	0.0827321
ZNF185	-0.948103	-0.950397	3.62147	0.00247099	0.0832327
CHAF1A	0.846507	0.849724	5.13279	0.0025188	0.0846001
BCYRN1	0.489617	0.489737	7.46204	0.00262955	0.0880673
TM4SF1	-0.421192	-0.421232	8.34014	0.00264776	0.0884245
FOXL2	1.96108	1.99825	1.0367	0.0026886	0.0895333
PELI2	2.52144	2.61067	0.438936	0.00277215	0.0920416
KYNU	-1.64516	-1.66129	1.4082	0.00278236	0.0920416
PCSK5	2.33201	2.38673	0.724715	0.00279417	0.0920416
TPM2	0.445193	0.445212	9.61639	0.00279532	0.0920416
ADGRG1	-0.837735	-0.838943	3.65329	0.00282032	0.0925501
TFRC	-0.459448	-0.459609	7.67	0.00282656	0.0925501
D2HGDH	0.677735	0.678506	4.53317	0.00285923	0.0933589
TSKU	-1.20836	-1.21298	2.43901	0.00293359	0.0955209
ERBB3	1.60174	1.61416	1.82843	0.00302874	0.0983461
HIST3H2A	2.335	2.39745	0.982369	0.00305141	0.0988083
ITGA7	-0.8908	-0.892292	3.39829	0.00314363	0.101432
SOX4	1.71002	1.72834	1.94401	0.00315737	0.101432
COL3A1	0.409094	0.40911	9.48774	0.0031584	0.101432
SPATA18	0.922658	0.924336	3.48004	0.00316717	0.101436
FBLN2	-0.863336	-0.865001	3.22431	0.00320189	0.102268
NPC2	-0.551212	-0.551494	5.81153	0.00322737	0.102688
SNRNP70	0.467415	0.467498	7.52396	0.00323341	0.102688
FPR1	0.979794	0.982509	3.2293	0.00324129	0.102688
DKK1	-0.697424	-0.698746	4.73747	0.00325206	0.102751
BTG1	-0.509457	-0.50964	5.98797	0.0032738	0.10316
OPLAH	1.06042	1.06429	2.93389	0.00329461	0.103537
PFAS	0.593241	0.593924	5.41649	0.00330695	0.103647
SP100	-0.447855	-0.447939	7.17032	0.00333397	0.10418
RBM6	0.505393	0.505596	6.22861	0.00334172	0.10418
PTGES	1.22443	1.22964	2.6311	0.00335459	0.104304
BCS1L	0.696183	0.697284	4.63024	0.00338007	0.104818
CREB3L3	-1.86293	-1.89261	0.828242	0.00342889	0.106051
TELO2	0.610454	0.61108	5.45951	0.00347957	0.106881
PTX3	-0.52365	-0.524151	7.22503	0.00348038	0.106881
IFITM3	-0.40331	-0.403325	8.96469	0.00348306	0.106881
PPP1R13L	1.68457	1.71623	2.38579	0.00356605	0.109142
PRAF2	-0.662406	-0.662964	4.8725	0.00358356	0.10931
GAS1	1.9244	1.97482	2.50638	0.00359019	0.10931
MIR4527HG	-0.859674	-0.86165	3.62268	0.00365598	0.111024
CAMK2N1	0.579191	0.57988	5.87056	0.0037204	0.112689
RARG	0.523292	0.52353	5.72576	0.00374151	0.113036
SLC2A1	0.399326	0.399366	8.99585	0.00376537	0.113316
PRR16	0.629276	0.630167	5.08884	0.00377011	0.113316
PLA2G4A	-0.873891	-0.876039	3.5406	0.00378659	0.11352
PDE2A	-1.37468	-1.38333	1.87288	0.00388025	0.116031
SETBP1	1.0485	1.05196	2.64283	0.00389431	0.116155
FBL	0.534776	0.535145	6.13728	0.00398171	0.1183
PSD3	0.481975	0.482088	6.39002	0.0039864	0.1183
BAIAP2L1	0.633502	0.634237	4.78921	0.0040202	0.118916
CNTN5	-1.46286	-1.47743	2.03201	0.00402744	0.118916
HMGA2	-0.476309	-0.476535	7.57831	0.00405607	0.119195
THBS3	1.15213	1.15802	2.56585	0.00405721	0.119195
TMEM204	-0.665415	-0.666527	4.80538	0.00407266	0.119349
LUC7L	0.554894	0.555257	5.33376	0.00417156	0.121726
FAM171A1	0.65638	0.657175	4.96626	0.00418974	0.121726
KCND2	1.10007	1.10408	2.57643	0.00419191	0.121726
STK36	0.626355	0.626893	4.85023	0.00419529	0.121726
MASTL	-0.777078	-0.780045	4.6454	0.00426906	0.123323
KLHL23	1.57401	1.59154	2.01592	0.00427647	0.123323
STARD4-AS1	1.30316	1.31634	3.25067	0.0042819	0.123323
CAVIN3	0.526521	0.52684	6.86467	0.00432401	0.12423
PMEPA1	0.645087	0.645911	4.90988	0.00433779	0.124322
NRXN2	-1.325	-1.3326	1.98529	0.00436553	0.124811
LDHAP4	2.86355	3.08599	0.999778	0.00438265	0.124996
ZNF561	0.683559	0.684531	4.57132	0.00439417	0.12501
ECM1	-0.43116	-0.431237	7.21089	0.00440446	0.12501
MT-ATP6	-0.576233	-0.57624	11.2325	0.00441961	0.125137
LAPTM4A	-0.416719	-0.416743	8.4953	0.00444388	0.12525
RPLP0P2	-1.30492	-1.31215	1.91737	0.00444777	0.12525
KDELR2	-0.405325	-0.405351	8.80892	0.00445777	0.12525
ABI3BP	-1.14751	-1.15394	3.23842	0.00446634	0.12525
CACNA2D4	-1.59819	-1.6141	1.52372	0.00458796	0.128353
PKIA	-0.673587	-0.67459	4.93926	0.00463722	0.129423
PARP9	-0.557384	-0.557667	5.43337	0.00468792	0.130527
DUSP23	0.791586	0.79353	3.84305	0.00474907	0.131916
MYD88	-0.635373	-0.63607	5.02092	0.00477534	0.132332
MT-ATP8	-0.55876	-0.558788	9.09355	0.00479967	0.132693
GEM	-0.479953	-0.480097	6.03479	0.00482354	0.133039
P3H1	-0.426308	-0.426361	7.58501	0.00495369	0.136308
HIST1H2BK	-0.684886	-0.685697	4.21491	0.00501211	0.137381
IRF2	-0.682082	-0.682971	4.51629	0.00501612	0.137381
UBE2L6	-0.483605	-0.483767	5.97127	0.005028	0.137385
TRANK1	-0.574323	-0.574658	5.08667	0.00504406	0.137446
LENG8	0.428105	0.428147	8.12749	0.00505369	0.137446
OSTC	-0.435424	-0.435497	7.36434	0.00509503	0.13825
C1orf115	-1.25171	-1.25837	2.45761	0.00518858	0.140463
PPFIBP2	0.839571	0.841805	3.40738	0.00526424	0.142007
CREBRF	-0.651244	-0.651966	4.47537	0.00526983	0.142007
MTCO1P12	-0.463411	-0.463458	8.37847	0.00528421	0.142068
GGT1	-1.04521	-1.04825	2.77003	0.00534714	0.143431
ZNF669	-2.12659	-2.18529	0.925553	0.00544837	0.145812
SFRP1	0.621207	0.622888	6.75086	0.0055062	0.147024
STMN1	0.448111	0.448287	7.97026	0.00552044	0.147069
STRIP2	-1.08978	-1.09565	2.71897	0.0055452	0.147394
DDX49	0.605169	0.605837	4.84859	0.00564064	0.149537
PLA2G15	-0.593371	-0.593919	5.04009	0.00565135	0.149537
CALU	-0.372056	-0.372062	10.9457	0.00572743	0.150626
KIAA1549L	0.548053	0.54872	6.01793	0.00573971	0.150626
TFPI	-0.424607	-0.424654	7.77343	0.00574367	0.150626
ZNF724	4.74679	1.44269e+08	0.817548	0.00576124	0.150626
ATP6V1E2	1.97145	2.02239	1.66218	0.00576805	0.150626
TAP1	-0.504569	-0.504718	5.97559	0.00576958	0.150626
IL11	-0.529559	-0.529806	5.51506	0.00584003	0.152126
PREX1	1.90404	1.94434	0.653289	0.00596078	0.154927
RASSF1	0.490807	0.491105	6.18148	0.00597421	0.154933
PMAIP1	-0.476243	-0.476406	6.08229	0.00599926	0.155239
AHNAK	0.372931	0.372935	12.1165	0.00601749	0.155368
CDA	-1.00356	-1.00834	3.08489	0.00605179	0.15591
TPM1	0.390894	0.39091	9.23361	0.00618198	0.158915
ALDH4A1	1.10621	1.11281	2.64186	0.00623767	0.159996
SLC39A8	-0.610431	-0.611041	4.81629	0.00631184	0.161544
SRSF1	0.422681	0.422794	7.60646	0.00635009	0.161848
ZNF189	-0.849561	-0.852109	3.58621	0.00635132	0.161848
DYNC2H1	0.457725	0.457857	6.45279	0.0063709	0.161995
PKMYT1	1.73868	1.79338	4.14582	0.00640245	0.162181
LINC00520	-1.64349	-1.66346	1.05126	0.00640587	0.162181
MT-TN	-0.966756	-0.97041	3.08814	0.00648365	0.163796
KCNMA1	-0.497683	-0.498044	6.1944	0.00657938	0.165857
ACAD10	0.663249	0.66437	4.12259	0.00660837	0.166093
HM13	-0.429896	-0.429982	7.17374	0.00661708	0.166093
TNFRSF10B	-0.391286	-0.391312	8.29192	0.00664696	0.166486
KAT2A	0.526814	0.527092	5.61216	0.00666889	0.16668
CCDC12	0.670297	0.671274	4.40406	0.00672264	0.167665
SLC4A3	1.62435	1.6492	1.46151	0.00677147	0.168319
GBA	-0.486602	-0.486828	5.86444	0.00677756	0.168319
HES6	1.11674	1.12158	2.8331	0.00684458	0.168995
HACD1	0.87913	0.882334	3.54401	0.00685027	0.168995
PLEKHH2	-0.762772	-0.763975	3.60313	0.00686225	0.168995
ADAMTS14	1.47583	1.49001	1.46664	0.00686245	0.168995
MOCOS	-0.5985	-0.598931	4.89587	0.00688368	0.169162
CD59	-0.374508	-0.374517	10.4613	0.00696582	0.170681
ARF4	-0.392396	-0.392421	8.84445	0.00697789	0.170681
CARD6	0.677345	0.678669	4.55278	0.00698917	0.170681
PGM3	-0.435656	-0.435749	7.04453	0.00707719	0.172351
CDK5	0.789323	0.791383	3.7028	0.00708694	0.172351
PBX3	-0.56725	-0.567793	4.88472	0.00714482	0.173399
SVIP	-0.677216	-0.67848	4.1932	0.0071662	0.173558
LAMB1	-0.394666	-0.394702	8.12747	0.00719116	0.173804
NGF	-1.56138	-1.5777	1.94164	0.00721123	0.17393
TMEM160	0.916557	0.920648	3.58993	0.0072553	0.174634
DNAJB9	-0.499384	-0.499637	5.6233	0.00732455	0.175939
CEP95	-0.683825	-0.685205	4.09659	0.00736872	0.176638
PLPP4	-1.21285	-1.22457	2.53606	0.0073857	0.176684
CIRBP	0.436968	0.437057	7.13328	0.00742939	0.177
AMZ1	-0.790973	-0.792392	3.36577	0.00744937	0.177
MRPS11	-0.666356	-0.667406	4.65888	0.00745124	0.177
CCR10	0.869842	0.872223	3.19559	0.00745931	0.177
ZNF749	1.39059	1.4043	2.15469	0.00760678	0.180135
MT-ND2	-0.589768	-0.589783	9.95407	0.0076682	0.181223
GATD1	0.520271	0.520668	5.78585	0.00771854	0.181825
TRPV3	-1.69725	-1.72385	0.844576	0.00772468	0.181825
MTRF1	0.876537	0.879785	3.3732	0.00778174	0.182494
GPR180	-0.485603	-0.485831	5.85916	0.00779571	0.182494
RBM43	-0.871267	-0.873946	3.21044	0.00779983	0.182494
NTN4	0.384769	0.384808	8.52534	0.00784576	0.183203
BIRC3	-0.591146	-0.591606	4.83577	0.00786704	0.183335
GLT8D2	-0.653626	-0.654543	4.282	0.0079005	0.183749
MGST2	-1.06618	-1.07095	2.61447	0.00798968	0.185455
CLDN12	-0.506707	-0.506949	5.8884	0.00802652	0.185942
SLC13A3	-1.69913	-1.72954	0.892419	0.00808481	0.186217
COMMD4	0.58804	0.588799	5.09555	0.00809364	0.186217
TRPC4	0.79581	0.797558	3.41759	0.00810027	0.186217
CDCA7	1.16803	1.18079	3.73348	0.00810191	0.186217
ERP44	-0.465109	-0.465293	6.12173	0.00811804	0.186222
PDE3A	1.0187	1.02317	2.82218	0.00814492	0.186287
HHIP-AS1	1.02892	1.03599	3.10194	0.00815263	0.186287
CDH9	-1.53527	-1.55211	1.28304	0.00820403	0.187096
PGR	0.61544	0.616056	4.45664	0.00824232	0.187605
TRIM69	-0.713147	-0.714516	3.80971	0.00828022	0.188102
COL11A2	1.71946	1.7451	0.963654	0.00830455	0.18829
AHNAK2	0.632068	0.632771	4.7954	0.00834277	0.188792
MED27	0.708913	0.710562	4.07127	0.00836204	0.188863
PDP1	0.485177	0.485367	6.05382	0.00857138	0.193219
EREG	-0.403593	-0.403618	8.171	0.00871141	0.195998
ACE	-1.66262	-1.68738	0.922349	0.00876686	0.196868
TREX1	-1.01197	-1.01809	3.0481	0.00879599	0.197145
OSGIN2	-0.578496	-0.578982	4.95074	0.00893703	0.19966
CRISPLD2	0.411778	0.411828	7.40492	0.0089423	0.19966
NMRAL1	0.840658	0.843369	3.49016	0.00899551	0.20046
ASIC1	1.47563	1.49253	1.39262	0.0090123	0.20046
RIMKLB	0.581469	0.58211	4.83161	0.00915441	0.203235
ITPKB	0.932361	0.935149	2.98727	0.0091942	0.203732
BTK	0.977567	0.98065	2.60426	0.00924884	0.204279
SYNE3	0.666887	0.668053	4.19513	0.00925373	0.204279
PTPRU	1.31683	1.32913	1.83301	0.00928518	0.204588
NPC1	-0.419806	-0.419869	7.19843	0.0093039	0.204616
POGLUT1	-0.555403	-0.555908	5.03377	0.00941854	0.206749
DERL1	-0.466737	-0.466923	6.21147	0.00945524	0.207167
CDC7	0.964844	0.971786	3.62533	0.00949557	0.207662
RCAN3	0.725683	0.727619	4.17075	0.00954941	0.208451
ABHD5	-0.568204	-0.56912	5.28921	0.00960894	0.209361
QTRT1	0.61895	0.620007	4.39606	0.00968946	0.210723
ALKBH8	0.755462	0.75761	3.78635	0.00987872	0.214293
RIN1	0.482538	0.482804	5.87347	0.0099035	0.214293
DIAPH3	0.530143	0.53093	6.3581	0.00990843	0.214293
CYBRD1	-0.396532	-0.396597	7.65486	0.00994503	0.214685
GSTM2	0.971157	0.976293	3.03757	0.0099632	0.214685
NAV3	-0.478952	-0.479206	6.2929	0.0100453	0.216057
IRAK3	0.883285	0.885674	3.5471	0.0100772	0.216258
SMIM10	0.707564	0.709682	4.45277	0.0100916	0.216258
STRADB	-0.538552	-0.538928	5.1706	0.0102277	0.218776
SYTL3	-0.641763	-0.642808	4.34927	0.0102848	0.219596
SH3BP2	-0.501452	-0.501728	5.55039	0.0104246	0.222177
CC2D2A	0.569326	0.569996	4.91937	0.0104723	0.222788
C20orf96	1.1047	1.11165	2.66152	0.010579	0.22465
SMPDL3A	-0.649754	-0.650962	4.13801	0.0106697	0.226167
EPM2AIP1	0.449087	0.449258	6.20264	0.0107845	0.228188
ILF3-DT	1.20326	1.21278	2.408	0.0108107	0.228331
ISCA1	-0.607134	-0.608007	4.6998	0.0108657	0.228701
TIGD6	1.05742	1.0631	2.5759	0.0108868	0.228701
RMC1	-0.552821	-0.553415	4.80926	0.0108868	0.228701
PRKAA2	-0.601712	-0.602472	4.36389	0.0109391	0.229388
TPMT	-0.539465	-0.53992	5.2397	0.0110657	0.231629
NAP1L5	-0.529976	-0.530385	5.09828	0.0111421	0.232812
RNASEH2C	0.656675	0.657837	4.45143	0.0113189	0.236086
UPF3AP2	1.41082	1.43113	1.64811	0.0113616	0.236555
MUTYH	1.50903	1.53141	1.91108	0.011554	0.240134
C3orf14	-2.35555	-2.47536	0.990221	0.0115931	0.240508
FRMD3	0.424928	0.425035	6.62558	0.011613	0.240508
SH3D21	0.917158	0.9208	3.09891	0.0117349	0.242391
GALE	-0.458051	-0.458237	5.73062	0.0117453	0.242391
SEMA3F	-0.620957	-0.621565	4.17085	0.0118102	0.243304
CCR7	1.14052	1.14758	2.71169	0.0118419	0.243516
B4GALT1	-0.382336	-0.382376	7.92772	0.0118621	0.243516
GJB5	-1.16236	-1.16908	1.82312	0.0119257	0.244393
DTWD2	-1.11472	-1.1223	2.1219	0.011992	0.244819
ANAPC2	0.546405	0.546979	5.11469	0.0120038	0.244819
TMED3	-0.417013	-0.41709	6.98621	0.0120091	0.244819
CBR3	0.801859	0.805077	3.44639	0.0120815	0.245867
KITLG	0.49832	0.498745	5.53452	0.0121824	0.247492
SLC43A2	1.32325	1.33833	2.11736	0.012275	0.248941
CCDC61	0.708568	0.710173	3.77223	0.0123094	0.249207
SOD2	-0.403466	-0.403554	7.04726	0.0123404	0.249404
ERRFI1	0.414928	0.415	6.99205	0.0123694	0.24956
BRI3	-0.40325	-0.403332	7.18827	0.0125138	0.25204
ACTN4	0.370576	0.370595	9.65507	0.012566	0.252656
TMEM159	-0.615735	-0.616531	4.2464	0.0128556	0.257662
GLB1	-0.425524	-0.42565	6.35153	0.0128799	0.257662
TGFB2	-0.418196	-0.418267	6.63113	0.0128809	0.257662
KLF15	0.986878	0.99016	2.63607	0.012922	0.258045
TNFRSF12A	-0.375074	-0.37511	8.25205	0.0130469	0.259873
ZIC4	1.10506	1.11182	2.27407	0.0130579	0.259873
LYRM7	0.511508	0.511888	5.29269	0.0130981	0.259987
RAB15	-1.28209	-1.29281	1.82856	0.013108	0.259987
TRIM22	-0.412335	-0.412426	6.59735	0.0132574	0.262174
TP53I3	0.626217	0.627627	4.3887	0.013274	0.262174
HTR1B	1.72491	1.76745	1.08211	0.0132854	0.262174
ULBP1	-0.490833	-0.491066	5.26513	0.0133217	0.262448
ITGA10	0.666863	0.668918	5.0695	0.0133925	0.262971
RAP1GAP	-1.55779	-1.57813	0.967187	0.013425	0.262971
COPS6	0.402384	0.40249	7.28578	0.0134326	0.262971
ATP6V0E1	-0.40608	-0.406181	7.01558	0.0134568	0.262971
RBM38	-1.36543	-1.37805	1.94662	0.0134604	0.262971
ATM	-0.397849	-0.397888	7.73237	0.0135235	0.263621
SRBD1	-0.616689	-0.617873	4.43105	0.0135386	0.263621
PARP8	-0.571686	-0.572218	4.82404	0.0136207	0.264375
RAC3	0.721516	0.723512	3.6704	0.0136576	0.264375
EEF2K	0.68867	0.690054	4.11367	0.013675	0.264375
CCDC81	1.93441	1.99205	1.13485	0.0136838	0.264375
NPR3	0.675893	0.677809	3.96302	0.0136901	0.264375
ACVR2B	-0.990549	-0.995857	2.6338	0.0137635	0.265231
LSM4	0.4622	0.462455	6.31267	0.0138139	0.265231
COL16A1	-0.764057	-0.766062	3.62355	0.0138154	0.265231
MAML3	1.6124	1.64093	1.17302	0.0138249	0.265231
EPSTI1	-0.628974	-0.62969	4.0995	0.0138805	0.265861
SLC25A12	0.613462	0.614566	4.49073	0.0139467	0.266693
PDE7B	2.16139	2.24525	1.12472	0.0140265	0.267577
ZNF444	0.526109	0.526478	5.18695	0.0140385	0.267577
ITM2B	-0.379847	-0.379882	8.08783	0.0140928	0.267926
ITFG1	-0.432951	-0.433089	6.45941	0.0141026	0.267926
CAND2	0.718562	0.72021	3.6574	0.0141458	0.268312
MT-ND3	-0.418934	-0.418959	8.66334	0.0141988	0.268698
IER3	-0.756142	-0.75844	3.42915	0.014228	0.268698
STT3A	-0.379501	-0.379551	7.97329	0.0142349	0.268698
MYRF	-0.82127	-0.823808	3.0498	0.0143025	0.269539
AP1G2	0.668548	0.669805	3.72786	0.0143667	0.270315
CALCR	1.15007	1.15932	3.11276	0.0144218	0.270778
REPS2	-1.73868	-1.78622	0.84855	0.0144584	0.270778
RGS10	-0.498438	-0.498755	5.27419	0.0144606	0.270778
ZNF446	1.23517	1.24581	2.02931	0.0145314	0.271553
CALR	-0.359284	-0.359299	9.89939	0.0145483	0.271553
CLCF1	1.28464	1.30182	2.63445	0.0145839	0.271785
MCUB	-1.06048	-1.06722	3.345	0.0146443	0.272476
PTN	-0.525935	-0.526611	5.6044	0.0147099	0.273264
MRGPRF	-0.599951	-0.601297	4.40133	0.0147922	0.274253
RBSN	-0.460051	-0.460254	5.86493	0.0148099	0.274253
FLOT1	0.425468	0.425574	7.08082	0.0148379	0.274337
CXCL5	-0.419809	-0.419866	7.15732	0.0148841	0.274758
TMEM39A	-0.467021	-0.467228	5.83613	0.0149562	0.275068
ZNF883	0.863679	0.867462	3.28654	0.0150165	0.275068
HES2	-1.37346	-1.38994	1.38764	0.0150206	0.275068
RCCD1	0.669499	0.671527	4.33943	0.0150377	0.275068
GBP3	-0.463864	-0.464133	5.84636	0.0150413	0.275068
FIBIN	-1.4129	-1.42897	1.43115	0.0150417	0.275068
MT-CYB	-0.517088	-0.517099	10.5607	0.0152707	0.27882
CSTA	0.639787	0.640631	3.706	0.015312	0.278895
ZNF880	-0.747163	-0.749377	3.39655	0.0153223	0.278895
ARNTL2	-0.499803	-0.500236	5.49306	0.0153491	0.278949
SULT1B1	2.27402	2.41458	1.09623	0.015423	0.279524
UNC13B	-0.500474	-0.500923	5.13043	0.0154284	0.279524
LPIN3	0.576014	0.576891	4.39661	0.0154983	0.280356
MAP3K7CL	0.956184	0.963656	3.34315	0.0155546	0.280942
MTCL1	0.480845	0.481199	5.67662	0.0155847	0.281052
ITM2C	-0.384763	-0.384813	7.5908	0.0157072	0.282825
SGCA	-1.22718	-1.23543	1.67009	0.015823	0.284474
DBF4	-0.705821	-0.707939	4.24974	0.015948	0.286282
ADAM23	1.47321	1.49409	1.43712	0.0160084	0.286927
VMP1	-0.411336	-0.411446	6.7297	0.0160774	0.287333
GPD1	-0.603025	-0.603626	4.07159	0.0160904	0.287333
PLEKHG4	0.460461	0.460753	5.95737	0.0161363	0.287333
ZNF529-AS1	-1.5817	-1.61575	1.01362	0.0161414	0.287333
KLF11	-0.850227	-0.852666	3.27144	0.0161536	0.287333
SLC9A9	-0.957043	-0.9616	2.52876	0.0162169	0.287374
PLXNA2	0.533128	0.533789	5.46895	0.0162207	0.287374
LIN37	-1.5494	-1.57836	1.04052	0.0162295	0.287374
CFLAR	0.408552	0.408651	6.96501	0.0163142	0.288438
PARP12	-0.471611	-0.471856	5.43696	0.016361	0.28883
POLR3GL	0.527316	0.527848	4.86565	0.0164253	0.28953
TMCC2	0.946517	0.951046	2.55644	0.0166526	0.293096
ABCC5	0.500952	0.501424	5.27929	0.01674	0.294193
GGT5	0.823278	0.827687	4.11145	0.0171532	0.301003
EMP1	0.367215	0.367248	8.95867	0.0172641	0.302497
NNMT	0.393165	0.393209	7.80061	0.0174104	0.304605
ERAP2	-0.397851	-0.397951	6.8423	0.0174373	0.30462
ZBTB16	1.08915	1.09693	2.67115	0.0175188	0.305589
C19orf66	-0.583716	-0.584377	4.39345	0.0176318	0.306392
MIR29B2CHG	0.684385	0.685892	3.52662	0.017643	0.306392
ARHGAP11A	0.539155	0.540424	6.07839	0.0176433	0.306392
TRMO	0.895369	0.899524	3.04217	0.0177329	0.307493
DHX16	0.526439	0.52713	4.97409	0.0178107	0.308385
MIR3648-2	1.55953	1.57984	1.31453	0.0178506	0.30862
PITPNM2	0.52494	0.525416	4.7273	0.0178788	0.308652
ABCC4	-0.441031	-0.441319	5.94861	0.0180249	0.310718
TGDS	-0.67567	-0.677314	3.65807	0.0180733	0.311017
NIF3L1	0.665392	0.667039	4.06511	0.0180954	0.311017
COL5A3	1.02426	1.02931	2.20166	0.0181452	0.311417
HAUS1	-0.672882	-0.674661	4.15341	0.0181754	0.31148
BNIP3P4	1.40949	1.43103	1.69305	0.0182094	0.311607
GMFG	0.608035	0.609118	3.94729	0.01824	0.311676
SNRPGP2	-1.29223	-1.30744	1.94257	0.0183411	0.312946
ZNF468	-0.825184	-0.828514	3.02218	0.0186129	0.317123
NRBF2	-0.491324	-0.491636	5.19177	0.0187204	0.318491
PLK4	-1.02251	-1.03555	4.34972	0.0188253	0.319812
ZNF555	-1.79485	-1.83445	0.763138	0.0190392	0.322978
APMAP	-0.365598	-0.365632	7.95621	0.0191395	0.32421
ADCK5	0.994813	1.00047	2.71856	0.0192797	0.325593
TRIM6	0.754344	0.757046	3.34215	0.0192817	0.325593
ECM2	-1.33528	-1.3508	1.42072	0.0193045	0.325593
IL18BP	1.22103	1.23234	1.8831	0.0193892	0.326131
RFK	-0.468795	-0.469055	5.66457	0.019392	0.326131
OPN1SW	-0.699375	-0.701328	3.44235	0.0194603	0.32681
RGS4	-1.02758	-1.04331	5.33978	0.0195231	0.327341
ADAMTSL4	0.548539	0.549068	4.27237	0.0195714	0.327341
OBSL1	0.456936	0.457139	5.94432	0.0195756	0.327341
NINJ1	-0.516598	-0.517039	4.69096	0.0196112	0.327469
TIMM10	0.611256	0.6127	4.16133	0.0197267	0.328575
STUB1	0.448177	0.448422	5.83979	0.0197335	0.328575
SCPEP1	-0.442189	-0.442434	5.73151	0.0197629	0.328596
FAM210A	-0.587045	-0.588233	4.26612	0.0199183	0.330711
DDX55	0.576048	0.577081	4.37815	0.0199712	0.330856
COTL1	0.368207	0.36826	8.24792	0.0199834	0.330856
SELENOW	-0.445363	-0.445552	5.90954	0.020067	0.331771
RENBP	-0.991361	-0.995771	2.20417	0.0201374	0.332466
LRRC34	1.01557	1.02228	2.56287	0.0203675	0.335528
UBL7	0.466587	0.466906	5.38868	0.0203965	0.335528
CTSS	-0.599096	-0.599841	4.01327	0.0204088	0.335528
MT-CO2	-0.452323	-0.45233	11.0174	0.0204418	0.335601
CLTC	-0.35498	-0.355001	9.0636	0.0205197	0.336409
KIF11	0.597672	0.599314	5.95237	0.0205997	0.337189
FZD1	0.494201	0.494629	5.02758	0.0206248	0.337189
SUPT3H	0.770174	0.772938	3.44566	0.0206682	0.337427
SCML1	-0.563597	-0.564439	4.68453	0.0208826	0.340454
FBXL13	-1.14029	-1.1512	1.94334	0.0209652	0.341326
PTGS1	-0.402223	-0.402372	6.9569	0.0211386	0.34367
SPRN	1.28698	1.3026	1.63704	0.0211804	0.343874
SLC9A3R1	-0.538164	-0.539006	4.62169	0.0212595	0.34468
C3orf52	-0.996743	-1.00465	2.6749	0.0213667	0.345664
RPS27	-0.38156	-0.381609	7.86488	0.0213791	0.345664
APOL6	-0.466742	-0.466959	5.41302	0.0215675	0.347935
SYTL2	0.476877	0.477273	5.45819	0.021579	0.347935
LPCAT3	-0.537983	-0.538667	4.67688	0.0216208	0.34813
HOXA-AS2	1.95988	2.04048	1.53971	0.0216683	0.348416
C1orf21	-0.54984	-0.550789	4.57162	0.0217368	0.34904
LSM3	-0.53094	-0.531595	5.01799	0.0218103	0.349371
HMGB3	0.589541	0.591257	5.32837	0.0218171	0.349371
FDPS	0.416614	0.416794	6.57064	0.0220867	0.351824
MYBPC2	-0.675677	-0.676899	3.25822	0.0221091	0.351824
ZNF354B	-1.1553	-1.16596	2.121	0.0221395	0.351824
ZNF574	-0.596009	-0.596961	4.22194	0.022156	0.351824
TESPA1	1.02875	1.03519	2.40457	0.0221584	0.351824
C5	1.07235	1.08316	2.50864	0.0221816	0.351824
TBRG4	0.466284	0.466603	5.7497	0.022185	0.351824
CD58	-0.702404	-0.70482	3.32493	0.022218	0.351824
B2M	-0.345016	-0.34502	11.0033	0.0222694	0.351824
NCSTN	-0.390136	-0.390199	7.37508	0.0222704	0.351824
SHB	-0.821976	-0.825895	3.23492	0.0224657	0.354431
HS6ST3	1.94728	2.01449	0.674254	0.0225526	0.354957
MSR1	-0.939879	-0.944994	2.72396	0.0225596	0.354957
UBA7	-0.46819	-0.468529	5.31847	0.0226365	0.355247
PHF1	-0.451061	-0.451325	5.34787	0.0226386	0.355247
SPICE1	-0.670165	-0.671806	3.74653	0.0226854	0.355506
OPN3	0.520968	0.521607	4.88364	0.0228742	0.357985
SLC15A3	-0.579614	-0.58029	4.13484	0.0229053	0.357995
TUBB3	-0.500464	-0.500869	4.55407	0.0229381	0.35803
ZNF141	1.04226	1.04956	2.37538	0.0230178	0.35851
PRSS23	-0.376167	-0.376263	7.53852	0.02303	0.35851
MT-CO1	-0.386514	-0.386516	12.389	0.0232106	0.360842
ENDOG	0.877125	0.883786	3.41564	0.0233047	0.36143
SEC14L2	0.590403	0.591872	4.33731	0.0233101	0.36143
RAB4A	0.60687	0.608324	3.95783	0.0234811	0.363032
FUCA1	0.394662	0.394725	6.70972	0.0234915	0.363032
C20orf27	0.478061	0.47855	5.2944	0.0235063	0.363032
EPB41L1	0.486202	0.486586	4.94175	0.0237363	0.364872
ANKRD36C	0.834934	0.838887	3.15903	0.0237474	0.364872
NUCB2	-0.406282	-0.406391	6.68149	0.0237497	0.364872
MRTFB	0.581707	0.582824	4.30642	0.023786	0.364872
KCNJ2	-0.76429	-0.767322	3.05661	0.023788	0.364872
MGMT	0.886621	0.890491	2.64538	0.0238123	0.364872
CXCL2	-0.482288	-0.482512	5.17199	0.0239493	0.366348
GRINA	-0.37876	-0.378818	7.35727	0.0239711	0.366348
NMI	-0.673263	-0.675114	3.56381	0.024137	0.368403
SNRNP35	0.632298	0.634	3.93021	0.0242063	0.36898
FER1L4	0.640122	0.641536	3.5976	0.0243694	0.370363
AMT	0.961939	0.965928	2.6556	0.0243771	0.370363
ADAMTS9	0.810664	0.813107	2.87005	0.0243961	0.370363
P2RX4	-1.21076	-1.21911	1.84392	0.0244233	0.370363
UNC93B1	-0.64853	-0.649639	4.06486	0.0244703	0.370596
IFT172	0.53477	0.535424	4.60366	0.0245466	0.371271
KRTAP2-3	-1.85937	-1.96754	2.55929	0.0249214	0.376336
HARS	0.408745	0.408886	6.52322	0.0249776	0.376336
TMEM198B	0.682573	0.684767	3.48458	0.0250253	0.376336
C12orf43	0.632682	0.634084	3.89585	0.0250325	0.376336
NRXN1	-1.25416	-1.26852	1.13298	0.0251236	0.376336
ZNF275	-0.481748	-0.482131	5.05679	0.025147	0.376336
ADGRB2	0.792457	0.794503	2.95007	0.0251618	0.376336
ACADL	-1.37726	-1.39951	0.923902	0.0251806	0.376336
CENPI	1.02617	1.04033	4.41363	0.0252146	0.376336
ENPEP	-0.450759	-0.451042	5.2245	0.025297	0.376336
TM6SF1	-0.839815	-0.842934	3.11605	0.0252997	0.376336
PHACTR1	-1.13063	-1.14224	1.92093	0.0253054	0.376336
UBL7-AS1	2.00364	2.10444	0.879943	0.0253056	0.376336
TAF6L	0.721602	0.724255	3.43382	0.0253309	0.376336
UBE2Q2P1	1.08218	1.09135	2.03696	0.0254209	0.377194
SAT1	-0.394654	-0.394753	6.44107	0.0254582	0.377271
PHLDB2	-0.865813	-0.870112	2.78044	0.0255432	0.378052
HMGB1P5	-1.27372	-1.29777	2.15499	0.0256291	0.378845
ERG28	-0.468057	-0.468517	5.23327	0.0258076	0.380786
STAC2	0.988466	0.993312	2.04036	0.0258474	0.380786
TSC2	0.401776	0.401911	6.48134	0.0258579	0.380786
CCNG2	-0.504064	-0.504564	4.84695	0.0259338	0.381425
NEU1	-0.553202	-0.553863	4.30992	0.0264936	0.389171
CCDC96	2.00864	2.10948	0.895757	0.0265347	0.38923
ALDOC	0.583558	0.584399	4.03804	0.026564	0.38923
ALDH7A1	0.453577	0.45396	5.49431	0.0266272	0.389668
FAM19A2	-1.32307	-1.34255	0.952347	0.0267419	0.390858
SDF2	-0.462921	-0.463239	5.30012	0.0268611	0.392111
VAMP1	0.674669	0.676627	3.33793	0.0270506	0.394276
ATRAID	-0.455958	-0.456244	5.42563	0.0270859	0.394276
CENPU	0.946068	0.957211	4.07078	0.0271419	0.394276
RIMS3	1.05311	1.06014	1.74542	0.027195	0.394276
PRDM15	0.808306	0.811568	3.24987	0.0272079	0.394276
FAP	0.424263	0.424458	6.24373	0.0272111	0.394276
MEGF8	0.374513	0.374557	7.55929	0.0273362	0.39546
TPBG	-0.352485	-0.352508	8.10314	0.0273732	0.39546
RBM12B	0.50972	0.510348	4.64767	0.0273941	0.39546
TMEM258	-0.51063	-0.511247	4.67187	0.0275322	0.396554
KLHDC4	0.569798	0.570792	4.14447	0.0275375	0.396554
NBEAL2	0.59184	0.59284	4.01546	0.0276025	0.396681
CENPE	0.469144	0.469782	6.155	0.027643	0.396681
IKBIP	-0.385743	-0.385851	6.96863	0.0276578	0.396681
TNFRSF10A	1.12147	1.13055	1.6231	0.0277047	0.396681
ST3GAL5	-0.5742	-0.575105	3.71698	0.0277156	0.396681
IFT20	-0.535131	-0.5358	4.35935	0.0278811	0.398564
MAD2L1	-0.60692	-0.608652	5.29706	0.0279219	0.39866
STOM	-0.403231	-0.403372	6.23961	0.0279811	0.39902
RNF220	0.45195	0.452187	5.73097	0.0280289	0.399167
CA13	-0.595274	-0.596482	3.72036	0.0280595	0.399167
SMARCC2	0.398664	0.398809	6.62263	0.0281118	0.399426
ZNF33A	0.633775	0.635477	4.04719	0.0281796	0.399905
ASPM	0.482475	0.483215	7.09127	0.0283135	0.401319
ARMC5	0.556837	0.557735	4.04909	0.0285764	0.404556
NT5C	0.557066	0.557977	4.59072	0.0288226	0.406865
RP2	-0.455868	-0.4563	5.56389	0.0288388	0.406865
CROCCP2	0.505662	0.506242	4.66507	0.0288552	0.406865
TCEAL7	-1.08582	-1.09224	2.36439	0.0289224	0.406865
TDRD7	-0.499189	-0.499693	5.00587	0.0289796	0.406865
HDHD5	0.51919	0.519989	4.58667	0.0290255	0.406865
MIR17HG	-1.36995	-1.38889	1.54491	0.0290476	0.406865
MYO1D	-0.401468	-0.401614	6.21036	0.0290768	0.406865
PRXL2C	-0.715425	-0.718189	3.6801	0.0290818	0.406865
JRK	0.532553	0.533644	4.94611	0.0290866	0.406865
LINC00894	1.2826	1.29977	1.20772	0.029128	0.406944
DPY19L1P1	-1.13685	-1.14775	1.5618	0.0291617	0.406944
HBP1	-0.554643	-0.555271	4.64596	0.0292214	0.407293
MFAP3L	0.629128	0.63047	3.73321	0.0293048	0.407971
VLDLR	0.782406	0.784543	2.89406	0.0294864	0.410012
HMGN3-AS1	1.48332	1.51872	0.891098	0.0297322	0.412939
GDNF	-0.958252	-0.967352	3.05023	0.0298282	0.413346
TMEM126A	-0.546288	-0.547218	4.36223	0.029837	0.413346
IFNGR2	-0.427478	-0.427699	5.81747	0.0298672	0.413346
SLC10A7	-0.67168	-0.673441	3.62473	0.0299636	0.413939
GGH	-0.404567	-0.404762	6.68413	0.0299808	0.413939
DKK3	-0.340446	-0.340464	9.18193	0.0300391	0.414257
LPIN2	-0.38692	-0.387022	6.60181	0.0301698	0.415534
CES1P1	-0.89598	-0.9022	2.89797	0.0302233	0.415534
UCKL1	0.488921	0.48949	4.85544	0.0302573	0.415534
ENTPD1	0.563839	0.56472	4.09417	0.0302735	0.415534
PDSS1	1.0471	1.05906	2.54646	0.0303713	0.416389
TCF21	-0.489261	-0.489753	4.51657	0.030509	0.416984
KIF20A	-0.748758	-0.754862	5.3968	0.0305268	0.416984
SNHG19	0.666373	0.668606	3.63158	0.0305419	0.416984
NDUFB11	0.427512	0.427725	5.85786	0.030557	0.416984
MCRIP1	-0.627488	-0.628992	3.8145	0.0306146	0.417232
C5AR2	-0.738081	-0.74041	3.27158	0.0306464	0.417232
RGS12	0.55353	0.554615	4.43536	0.030704	0.417531
ARSB	-0.413593	-0.413771	6.08985	0.0307752	0.418016
ZNF517	0.839076	0.84331	2.57728	0.0308474	0.418094
SP110	-0.489836	-0.490458	4.76774	0.0308601	0.418094
NGFR	-1.31742	-1.33588	0.843289	0.030888	0.418094
ERGIC2	-0.417662	-0.417856	6.03555	0.0309735	0.41868
JARID2	0.486027	0.486415	5.17375	0.0310027	0.41868
TSPAN12	-0.741155	-0.744021	3.22571	0.0310663	0.418942
GNL3L	0.560688	0.561645	4.32695	0.0310936	0.418942
GNS	-0.350911	-0.350937	8.40999	0.0311824	0.419656
ZDHHC9	-0.423582	-0.423762	5.97817	0.0312239	0.419733
DCHS2	-0.777894	-0.781583	3.19413	0.0312785	0.419984
NCAPD3	0.460814	0.461347	5.85935	0.0313695	0.420725
KIFC2	0.569342	0.570204	4.28018	0.0314506	0.420765
PNRC2	0.7844	0.788044	3.04597	0.0314622	0.420765
AGA	-0.482171	-0.482664	4.74669	0.0314802	0.420765
ADGRG6	-0.42211	-0.422297	5.93297	0.0317476	0.423811
TRIB2	0.542164	0.542898	3.98129	0.0317857	0.423811
TTC39B	0.384115	0.384186	6.71309	0.0318166	0.423811
NFYB	0.498129	0.49876	4.51641	0.031872	0.423893
C11orf1	-1.31518	-1.3328	1.53533	0.031901	0.423893
DEPTOR	0.851832	0.85482	2.64212	0.0319312	0.423893
CDH4	0.409263	0.409477	5.90909	0.032	0.424326
THAP1	-0.622409	-0.624127	3.63213	0.0320837	0.42451
LINC01133	-1.10324	-1.11197	1.48819	0.0320863	0.42451
SCN8A	-0.493549	-0.494059	4.69228	0.0323899	0.428043
APBB1	0.421466	0.421702	5.70297	0.0325149	0.428135
TTLL1	0.830074	0.832643	3.01321	0.0325381	0.428135
MBNL2	-0.42379	-0.423948	6.31328	0.0325416	0.428135
MT-ND4L	-0.372203	-0.37222	9.23326	0.0325429	0.428135
ADAM22	1.63293	1.67431	1.17393	0.0326665	0.429279
USP49	0.587881	0.58897	3.82556	0.0327803	0.430292
IDS	-0.369764	-0.369833	7.00646	0.0329615	0.432178
PLA2G6	0.889031	0.893963	2.61154	0.0329977	0.432178
CTSZ	-0.360495	-0.360541	7.85304	0.0331674	0.433818
FAM173A	0.504653	0.505316	4.6596	0.0331969	0.433818
KIAA1551	-0.605289	-0.606869	3.71799	0.0333258	0.434261
TCTEX1D4	1.10508	1.11467	1.88865	0.0333918	0.434261
FRY	0.937918	0.943581	2.24915	0.0334743	0.434261
CLCN4	-1.0536	-1.06203	1.97722	0.0334784	0.434261
SCARB2	-0.348359	-0.348393	8.205	0.0335156	0.434261
FOXQ1	1.27045	1.29974	2.35494	0.0335766	0.434261
RPIA	0.555288	0.556503	4.00371	0.0335811	0.434261
WDR77	0.515505	0.516368	4.54483	0.0335934	0.434261
HYAL1	0.596769	0.598148	3.54531	0.0336293	0.434261
CUBN	1.25795	1.27198	1.25522	0.0336333	0.434261
E4F1	0.562738	0.563801	4.3349	0.0336611	0.434261
EXOSC3	0.58889	0.590216	4.08786	0.0336754	0.434261
PPIC	-0.458582	-0.458973	4.91566	0.0337378	0.434587
KIF7	0.438954	0.439196	5.69517	0.0338335	0.435342
ZNF710	-0.525738	-0.526584	4.70279	0.0339496	0.436357
GHDC	0.477466	0.477946	4.74463	0.0340208	0.436792
FAM200A	-0.932159	-0.938433	2.39558	0.034106	0.436985
HS6ST1	0.46232	0.462768	4.96084	0.0341447	0.436985
EEF1A2	1.04315	1.04965	1.81207	0.0341823	0.436985
ZDHHC18	-0.43482	-0.435059	5.60667	0.034196	0.436985
RNF168	-0.447717	-0.448168	5.41979	0.0342222	0.436985
CKS2	-0.516949	-0.517901	5.61381	0.0342886	0.437357
KCTD16	0.584593	0.585784	3.94903	0.0345317	0.439623
ZNF10	1.09046	1.101	1.8835	0.0345593	0.439623
CD109	0.390812	0.390929	7.05832	0.0346143	0.439623
FAM218A	1.41514	1.44379	1.149	0.0346242	0.439623
COLGALT1	-0.341422	-0.341448	8.44885	0.0346829	0.439623
TMEM38B	-0.488203	-0.488795	4.47063	0.0347082	0.439623
KBTBD4	1.12216	1.13716	2.05252	0.0347288	0.439623
ABCB8	0.439191	0.439444	5.71142	0.0348363	0.440243
GSTM1	0.525626	0.52664	4.35236	0.0348543	0.440243
ITGA2	-0.425824	-0.426146	6.13332	0.0349312	0.440243
ARHGEF9	0.455894	0.456216	5.25579	0.03497	0.440243
CIR1	-0.4487	-0.449043	5.00607	0.0350042	0.440243
PYCARD	1.21147	1.22809	2.22445	0.0350247	0.440243
CEP89	0.513457	0.514272	4.88028	0.0350427	0.440243
SLC22A4	-0.801898	-0.804779	2.91757	0.0351264	0.440243
BMPR1B	1.22915	1.24585	1.62208	0.0351992	0.440243
FOXE1	0.552504	0.553475	4.01949	0.0352109	0.440243
METTL8	-0.551785	-0.55285	4.01725	0.0352213	0.440243
PWP2	0.470657	0.471189	4.94727	0.0352284	0.440243
BRAT1	0.440597	0.440923	5.3326	0.0355745	0.444094
AKR1C1	-1.29826	-1.32112	1.25324	0.035643	0.444476
WBP2	-0.36655	-0.36663	6.93697	0.035731	0.444777
KSR1	-1.09455	-1.10422	1.38366	0.035743	0.444777
CCDC57	0.530819	0.531615	4.46883	0.0358575	0.445141
ZNF487	1.58678	1.63269	1.12145	0.0358686	0.445141
GAN	-0.582604	-0.58378	3.81395	0.0358862	0.445141
BMPER	0.713754	0.717145	3.62317	0.0360362	0.446529
CERCAM	-0.351322	-0.351355	7.95866	0.036098	0.446631
FES	1.10008	1.11244	1.6265	0.0361207	0.446631
UNC119	-0.482784	-0.483303	4.66338	0.0362043	0.447194
INTS11	0.395975	0.396135	6.32483	0.0364946	0.450305
TEX2	0.444166	0.444522	5.35634	0.0368645	0.454391
MEIS1	0.420813	0.42109	5.59565	0.0370258	0.4559
PRKAR2B	-2.25246	-2.47893	1.42732	0.0372267	0.457793
OGG1	0.653944	0.65607	3.51451	0.0373422	0.457793
NPIPB3	-0.890954	-0.895868	2.3754	0.0373487	0.457793
ZNF276	0.603052	0.604577	3.57146	0.0373656	0.457793
FIBP	0.457426	0.457812	5.33497	0.0373748	0.457793
LYSMD4	0.732387	0.735333	3.07179	0.0374544	0.458289
DAAM1	-0.788694	-0.792281	2.77418	0.0378297	0.462398
NRBP2	0.430571	0.430952	5.48012	0.0378722	0.462435
PHKA1	0.52295	0.523613	4.33434	0.037952	0.462928
TROAP	0.898358	0.910615	3.97352	0.0381073	0.464254
KIF17	-1.90309	-1.99144	1.05945	0.03814	0.464254
BUB1B	-0.615136	-0.618488	4.99876	0.0382664	0.465309
LIFR	-0.487334	-0.488014	4.66537	0.0383729	0.466122
HSPB1	0.342834	0.342865	8.70684	0.0385555	0.467578
VPS33B	0.516379	0.517216	4.35493	0.03858	0.467578
PTRH2	-0.674893	-0.677443	3.26429	0.0386125	0.467578
DENND2A	-1.34367	-1.37225	1.79129	0.0387995	0.469358
COX19	-0.598251	-0.599581	3.63431	0.0389974	0.471265
FEM1A	1.30617	1.32814	1.11913	0.0390472	0.471382
MLF1	0.65515	0.656681	3.20586	0.0392001	0.47274
GDF11	-0.490631	-0.491256	4.5108	0.0393202	0.473318
INSR	0.478542	0.479045	4.78209	0.0393752	0.473318
KDELC1	-0.540994	-0.541994	3.97822	0.0393977	0.473318
RPS27L	-0.362517	-0.362569	7.3252	0.0394333	0.473318
LBX2-AS1	-1.47595	-1.51158	1.29991	0.0394649	0.473318
TBCD	0.377975	0.378111	6.58527	0.0394903	0.473318
KCNN2	0.872427	0.879074	2.83732	0.0395367	0.47339
HSBP1L1	0.549759	0.55097	4.04214	0.0396996	0.474856
CAMTA1	-0.453761	-0.454277	4.89016	0.0398823	0.476454
OSBPL5	0.430795	0.431158	5.40128	0.0399549	0.476454
COQ8B	0.527657	0.52844	4.31774	0.0399551	0.476454
PSMD8	-0.35328	-0.353327	7.61613	0.0400648	0.47722
MCFD2	-0.340278	-0.3403	8.9242	0.0401205	0.47722
DUS2	0.739169	0.742037	3.3566	0.0401415	0.47722
FGF1	0.395135	0.395285	6.08632	0.0402786	0.478364
DDOST	-0.343781	-0.34382	7.89535	0.0403195	0.478366
CADPS2	-0.458551	-0.45897	5.00641	0.0404499	0.479254
SVIL	0.604127	0.605803	3.53909	0.0405114	0.479254
CCDC97	0.592324	0.594029	4.11791	0.0405244	0.479254
METTL14	0.472665	0.473203	4.82072	0.0406007	0.479254
TAMM41	0.693243	0.695894	3.24887	0.0406342	0.479254
SLC25A45	1.39832	1.42942	0.924	0.0406397	0.479254
MICB	-0.874618	-0.879816	2.70278	0.040815	0.480458
AGT	1.02249	1.02906	1.70884	0.0408238	0.480458
AGTPBP1	0.410232	0.410472	5.44281	0.0409267	0.481098
RAB38	-1.1768	-1.18638	1.60949	0.0409602	0.481098
AGTRAP	-0.460792	-0.461311	4.71565	0.041019	0.481306
TMEM225B	-1.31762	-1.33816	0.777936	0.0410977	0.481748
ALDH1B1	0.430061	0.430419	5.32592	0.0413686	0.484438
FAIM	0.493428	0.494192	4.43458	0.0415576	0.486165
LRRC45	0.690491	0.694719	3.78199	0.0416003	0.48618
TARS2	0.560472	0.561316	4.47132	0.0416499	0.486275
CLDN1	-0.759726	-0.762166	2.5277	0.0418813	0.48849
ZFP69	0.881208	0.8864	2.41045	0.0421462	0.491091
NDUFB4	-0.399446	-0.399627	6.02153	0.0422472	0.491777
ASAH1	-0.362586	-0.362662	6.69686	0.0422889	0.491777
DEDD2	-0.470627	-0.471086	4.54555	0.042358	0.492091
LINC00886	-1.27985	-1.30393	1.84998	0.0424569	0.492698
UBE2V1	-1.03206	-1.04164	1.8461	0.0425336	0.492698
TAZ	0.550285	0.551291	4.11106	0.0425363	0.492698
EXD3	0.508617	0.509373	3.96353	0.0426123	0.493091
PIP5KL1	1.36891	1.3931	1.02405	0.0427684	0.49441
CREBZF	0.371542	0.371664	6.50275	0.0428749	0.494412
CA5B	0.781279	0.785222	2.56259	0.0428865	0.494412
MRPS18A	0.646361	0.648641	3.22276	0.0428951	0.494412
TCHP	0.450388	0.451003	5.14413	0.0429376	0.494415
REV3L	-0.417818	-0.418084	5.50248	0.0430376	0.49508
GALNT3	-0.641847	-0.64332	3.79613	0.0432111	0.496589
TXNDC12	-0.386782	-0.386928	6.12526	0.0432868	0.496971
ZNF184	-0.970814	-0.978414	2.37953	0.0433393	0.497039
AGTR1	0.429438	0.429772	5.41497	0.0433775	0.497039
CRELD1	-0.44329	-0.443655	4.80295	0.0434652	0.49738
ACCS	0.508005	0.508749	4.15728	0.0434921	0.49738
ZNF611	-0.796946	-0.800944	3.13653	0.0436313	0.498486
KPTN	0.636711	0.63848	3.33288	0.0438013	0.499941
HPSE	-0.928839	-0.9346	1.90646	0.0440225	0.501977
FLCN	-0.443892	-0.444294	4.73832	0.0441452	0.502886
CAMK1G	0.546033	0.547008	3.8582	0.0442421	0.503228
NCBP3	0.409695	0.409984	5.57266	0.0442611	0.503228
PSMB9	-0.470326	-0.470691	4.65411	0.0443504	0.503755
CCDC15	-1.24316	-1.27273	2.30823	0.0444125	0.503973
FAM81A	1.35552	1.38358	0.980541	0.0445202	0.504706
CYP1B1	0.978946	0.987531	2.8612	0.0446002	0.505124
TMEM214	-0.34629	-0.346346	7.40622	0.0446748	0.505481
TNFAIP8	-0.842317	-0.8475	2.72025	0.044732	0.50564
ZNF738	1.47859	1.51788	1.87345	0.0448042	0.505968
MAPK8	-0.40804	-0.408338	5.6546	0.0448579	0.506087
ARRB2	0.532782	0.533836	3.9261	0.0449522	0.506226
MIR155HG	2.60663	3.0105	0.766701	0.0449641	0.506226
GRK5	0.448003	0.448479	5.03573	0.0449998	0.506226
CNTNAP3B	1.61161	1.68484	1.3803	0.0452605	0.508079
LARP7	0.436431	0.436877	5.00479	0.0452671	0.508079
HSF4	0.953248	0.959984	2.13616	0.0453447	0.508079
SOCS2	0.548206	0.549374	3.79485	0.0453562	0.508079
C2orf16	1.34947	1.38291	1.12286	0.0453812	0.508079
ZBTB33	-0.443236	-0.443657	4.88544	0.045569	0.508647
PTCSC3	1.52179	1.5811	1.50097	0.0455714	0.508647
TOX2	0.547945	0.549492	4.43135	0.0456103	0.508647
CDYL	-0.417596	-0.417849	5.26771	0.0456438	0.508647
ERVK13-1	1.02354	1.03632	2.24357	0.045649	0.508647
CPM	0.437482	0.437819	5.31086	0.0459103	0.511074
TRAIP	-1.41121	-1.45352	2.43892	0.0459739	0.511296
GPR1	-0.475528	-0.476332	4.62525	0.0462845	0.513814
TLR4	-0.475158	-0.475844	4.95485	0.0463388	0.513814
SCAMP2	-0.380608	-0.380769	6.06301	0.0464039	0.513814
VPS51	0.390216	0.390405	6.04601	0.0464136	0.513814
CBR4	0.541643	0.542809	4.02653	0.0465256	0.513814
NMRAL2P	-1.40202	-1.43151	1.24041	0.0465293	0.513814
PBX1	0.510534	0.511452	4.53796	0.0465356	0.513814
FADS2	-0.333565	-0.333588	8.83782	0.046551	0.513814
PIP4K2C	-0.409619	-0.409878	5.51145	0.0467034	0.515011
OTUD6B	0.446497	0.446995	4.79854	0.0467692	0.515252
YWHAH	0.352	0.352089	7.45647	0.0469206	0.516435
POP1	0.579851	0.581524	4.2256	0.046998	0.516802
TMEM45A	-0.437936	-0.438266	5.12452	0.0471007	0.517445
ALDH16A1	0.492343	0.49316	4.38853	0.0471779	0.517808
KDELR1	-0.337298	-0.33734	7.92252	0.0472585	0.518208
CCNF	0.600685	0.603409	4.64217	0.0473691	0.518935
HMGB1P6	1.21311	1.23403	2.40416	0.0474501	0.519337
MFSD6	-0.416674	-0.41691	5.30844	0.0475111	0.519337
AFF3	0.398543	0.398767	6.00219	0.0475393	0.519337
SNHG8	0.397348	0.397526	5.72463	0.047583	0.519337
ADAMTS10	0.950774	0.956868	1.82942	0.0476474	0.519465
NDUFAF2	-0.461311	-0.461845	4.69035	0.0476834	0.519465
NFKBIA	-0.415541	-0.41588	5.32042	0.0478097	0.520286
SEC22A	-0.524309	-0.525295	3.98555	0.0478475	0.520286
GKAP1	-1.20292	-1.2188	1.14747	0.0479963	0.52142
ATP5MF	-0.438406	-0.438839	5.06125	0.0480984	0.522045
DDX60L	-0.381976	-0.382137	6.02307	0.0481718	0.522358
KATNAL1	-0.386869	-0.387071	6.44341	0.0482697	0.522897
EIF4B	0.331951	0.331971	8.89148	0.0483106	0.522897
ZNF649	1.02915	1.04093	2.11222	0.0484021	0.523265
SYS1	-0.510245	-0.511146	4.11832	0.0484445	0.523265
FAM225A	1.77148	1.84818	0.925105	0.0484785	0.523265
MTFR2	-1.8837	-2.02727	2.08664	0.0486453	0.524495
LY96	-0.794382	-0.79776	2.58195	0.048724	0.524495
TSPAN13	-0.436643	-0.436981	4.87708	0.0487268	0.524495
DDO	-0.874725	-0.879357	2.36661	0.0488894	0.525763
MAP2K1	-0.358882	-0.358977	6.8274	0.0490031	0.526503
KMT5B	0.458505	0.458834	5.24171	0.0490633	0.526582
MRS2	0.425206	0.425565	5.05594	0.0491004	0.526582
PAOX	0.88047	0.885881	2.01885	0.0492021	0.526909
PLA2G4C	-0.99764	-1.0047	1.65186	0.0492207	0.526909
HYI	0.773106	0.777331	3.6888	0.0493738	0.527777
CAVIN2	0.487183	0.488012	4.56902	0.0493918	0.527777
CDK2	-0.410981	-0.41137	6.01557	0.0497625	0.53077
PPCDC	-1.07598	-1.08762	2.17938	0.0497626	0.53077
RARRES1	1.6734	1.7356	0.926168	0.0498636	0.531365
TSEN2	0.658232	0.660423	3.34	0.04998	0.532121
MYOCD	1.77141	1.86629	1.94962	0.050206	0.533545
MEMO1	0.93505	0.94125	2.29868	0.0502232	0.533545
USP35	0.491957	0.492809	4.33938	0.0502503	0.533545
KDSR	-0.348948	-0.349011	7.19176	0.0503596	0.534222
TPST1	-0.466474	-0.466964	4.71573	0.0505134	0.535369
SERPINE1	-0.305466	-0.305467	13.9136	0.0506677	0.535808
CMTM3	-0.48738	-0.48807	4.50767	0.0506856	0.535808
EDNRA	0.347329	0.34737	7.11197	0.050692	0.535808
PXN	0.343632	0.343682	7.91311	0.0507526	0.535965
DYRK3	-0.405289	-0.405495	5.33057	0.0508293	0.536293
PIK3R3	0.68939	0.692507	3.34898	0.0509939	0.537545
MORF4L1P1	0.469801	0.470453	4.44818	0.0511066	0.538249
LIN9	-1.13152	-1.15386	2.40617	0.0512139	0.538896
ITGB5	-0.34567	-0.345747	7.84565	0.0513571	0.539556
FNDC4	-0.472702	-0.473361	4.11744	0.0513882	0.539556
OSTM1	-0.358082	-0.358163	6.9272	0.0514476	0.539556
CECR7	1.16461	1.18173	1.50334	0.0514712	0.539556
CTDSPL	0.401183	0.401422	5.74729	0.0515068	0.539556
PYROXD2	0.539799	0.540571	4.05627	0.0517447	0.541563
MT-CO3	-0.381828	-0.381835	10.9729	0.0517965	0.541622
PLEKHJ1	0.416678	0.417007	5.35966	0.0519853	0.542773
DAB2	-0.372963	-0.373064	6.56043	0.0521129	0.542773
DLX1	-0.666764	-0.669481	3.4053	0.0521292	0.542773
RFC3	0.612013	0.614811	4.29974	0.0521304	0.542773
LAMTOR3	-0.437154	-0.437598	4.78782	0.0521381	0.542773
ICAM1	-0.599028	-0.60008	3.39787	0.0522601	0.543428
CDK10	0.402666	0.402912	5.66434	0.0522937	0.543428
TIE1	-0.947996	-0.954922	1.53988	0.0525306	0.545406
KIAA1522	-0.545426	-0.546618	3.67666	0.0525956	0.545557
LINC00839	0.498387	0.499246	4.16101	0.0526422	0.545557
L3MBTL2	0.484528	0.485374	4.30405	0.0526848	0.545557
COL1A2	0.326351	0.326357	10.7556	0.0527634	0.54589
ZC3HC1	0.497025	0.498049	4.04878	0.0528652	0.546218
IER3IP1	-0.432422	-0.432733	5.46098	0.0529042	0.546218
TNNT1	-0.97976	-0.987797	1.756	0.0529743	0.546218
RBPJ	-0.343018	-0.343072	7.33001	0.0529816	0.546218
SDF2L1	-0.507664	-0.509107	4.54211	0.0531245	0.54721
PPWD1	0.432608	0.433051	4.8468	0.0532882	0.547772
SLC2A9	0.841374	0.846013	2.10582	0.0533563	0.547772
GOLGA7	-0.365589	-0.365686	6.28983	0.0533843	0.547772
PDGFC	-0.36758	-0.367743	6.29361	0.0533851	0.547772
CCDC59	-0.477238	-0.47799	4.30651	0.0534127	0.547772
AGAP4	1.42891	1.46745	0.828723	0.0535763	0.548907
CROCC	0.469679	0.470173	4.85564	0.053617	0.548907
ZNRF3	-0.607725	-0.609896	3.52903	0.0538064	0.550366
TBCCD1	-0.618585	-0.620305	3.57439	0.0541029	0.552763
ATF1	-0.465059	-0.465673	4.61674	0.0541352	0.552763
MYDGF	-0.342843	-0.342888	7.7728	0.0543073	0.554039
ADIRF-AS1	1.29752	1.32096	1.54582	0.0544349	0.554154
KIAA1958	-1.07787	-1.08988	1.37624	0.0544928	0.554154
DEPP1	0.614309	0.616166	3.32582	0.0545055	0.554154
TMEM199	-0.811917	-0.816757	2.63012	0.054508	0.554154
DYM	-0.407004	-0.407288	5.33436	0.0546128	0.554154
POU2F2	-0.777712	-0.780866	2.53391	0.0546218	0.554154
APLP1	0.433233	0.433583	5.0851	0.0546509	0.554154
SLC35B3	-0.415252	-0.415606	5.10452	0.0546968	0.554154
ROBO1	-0.344712	-0.344759	7.30384	0.054848	0.555206
DCBLD2	-0.327729	-0.327763	8.90981	0.055333	0.558776
SDC2	-0.450501	-0.450964	4.69416	0.0553436	0.558776
CHST7	0.418607	0.418899	5.11081	0.0553998	0.558776
STX10	0.464493	0.4652	4.48457	0.0554219	0.558776
CD63	-0.325855	-0.325869	9.58509	0.0554391	0.558776
MYL6	0.344296	0.344315	9.32255	0.0555916	0.559381
ABCF3	0.396597	0.396868	5.51233	0.0555945	0.559381
GABPB2	0.439186	0.439734	4.53164	0.0560822	0.563565
CSAD	0.546754	0.547761	3.62493	0.0561065	0.563565
SCAMP3	-0.364265	-0.364426	6.31442	0.0563381	0.565162
CTSC	-0.352958	-0.353054	7.24359	0.0563985	0.565162
RAB5A	-0.365475	-0.365594	6.4284	0.0564508	0.565162
DIXDC1	0.434971	0.435382	4.86862	0.0564583	0.565162
TUBA1A	0.343239	0.343367	7.81994	0.0566966	0.566604
TRIM7	0.612448	0.614962	3.69997	0.0566991	0.566604
LOX	-0.339328	-0.339372	7.88814	0.0567486	0.566616
MGA	-0.455668	-0.456266	4.35238	0.0568846	0.567421
HOOK2	0.5542	0.555222	3.70887	0.056926	0.567421
TMOD2	0.436825	0.437638	5.62238	0.0571673	0.568494
NT5C2	-0.439001	-0.439511	4.85077	0.0571759	0.568494
ANKZF1	0.428015	0.428427	4.85765	0.0572337	0.568494
TXNDC17	-0.434051	-0.434635	4.88782	0.0572728	0.568494
SPSB2	-0.764514	-0.768565	2.71798	0.0572762	0.568494
B3GNT2	-0.481513	-0.482326	4.59321	0.0575878	0.571053
TMEM246	0.454942	0.455493	4.39094	0.0576315	0.571053
KCND1	1.19402	1.21141	1.32862	0.0577397	0.571386
FNIP1	-0.38873	-0.388931	5.55855	0.0577626	0.571386
DNASE1	0.540731	0.541926	3.77688	0.0578474	0.57154
KLHL24	-0.467555	-0.468018	4.30121	0.0579026	0.57154
LURAP1	-1.27419	-1.2954	1.14957	0.0579243	0.57154
COL4A1	-0.325682	-0.325705	8.76749	0.0580765	0.572416
ZNF76	0.467563	0.468345	4.38607	0.0581108	0.572416
CCDC149	-0.443375	-0.443815	4.63589	0.0582815	0.573443
WASH3P	0.560838	0.562369	3.3989	0.0583129	0.573443
MAPK12	0.488674	0.489367	4.59043	0.0585005	0.573487
TPM1-AS	0.711593	0.713904	2.90607	0.0585176	0.573487
RAPH1	0.360139	0.360204	6.50099	0.0585329	0.573487
CHD1L	0.368773	0.368928	6.18074	0.0585457	0.573487
SNRPF	0.427063	0.427677	4.94085	0.058562	0.573487
CLN6	-0.515628	-0.517051	4.35721	0.0586391	0.573763
MRPL14	-0.432758	-0.43328	4.81803	0.0588286	0.57414
LTO1	0.486099	0.486972	4.33292	0.0588318	0.57414
STC2	-0.318862	-0.318871	10.0722	0.0588673	0.57414
NPRL3	0.389213	0.389446	5.64583	0.0588736	0.57414
TGIF1	-0.444605	-0.44513	4.67575	0.0590118	0.574892
GFRA1	-0.574665	-0.576427	3.83999	0.0590682	0.574892
GPR176	-0.344345	-0.3444	7.55939	0.0590979	0.574892
TTC12	0.859869	0.866999	2.38847	0.0591697	0.575077
HSD3B7	0.783239	0.787701	2.60063	0.059243	0.575077
BID	-0.420524	-0.420886	4.9149	0.0592823	0.575077
PHLDB1	0.348216	0.348299	7.25066	0.0593281	0.575077
ITGA4	0.361945	0.362056	7.03785	0.0593621	0.575077
LAMA5	0.369054	0.369137	6.15852	0.0594634	0.575579
DNAJC9	-0.540771	-0.542438	3.8956	0.0595397	0.575579
TMEM167B	-0.390041	-0.390237	5.78839	0.0595612	0.575579
GINS1	-0.94298	-0.961496	4.23292	0.0597255	0.57609
H6PD	0.336861	0.336908	7.51767	0.0598176	0.57609
GMNC	-0.828022	-0.832535	2.21963	0.0598526	0.57609
GALK1	0.406072	0.406418	5.10196	0.0598546	0.57609
DNAH14	0.563943	0.565289	3.28084	0.0598599	0.57609
CEBPD	0.37779	0.377986	5.78696	0.0599696	0.576672
SEC61B	-0.380743	-0.380936	5.99626	0.0601892	0.57831
TAF12	-0.439346	-0.439911	4.50158	0.0603705	0.579577
TGFBR3	0.43963	0.440305	4.63498	0.0605153	0.580491
LXN	0.514514	0.515836	3.90446	0.0605911	0.580743
FAM98C	0.597772	0.599706	3.40003	0.0607375	0.58167
C1orf50	-0.666803	-0.669438	2.97695	0.0608562	0.582331
FAR2	0.433338	0.43394	4.79816	0.0611115	0.584292
TRAPPC10	-0.360349	-0.360488	6.27489	0.061244	0.584292
SNX16	-0.530658	-0.531601	3.81294	0.061254	0.584292
COX7A2L	-0.345845	-0.345929	6.80301	0.0612605	0.584292
CENPT	0.337222	0.337257	7.43441	0.0613832	0.584987
PIP4P2	-0.414201	-0.414479	5.16015	0.0616264	0.586827
GOLT1B	-0.345885	-0.345953	6.94535	0.0617441	0.587471
TMBIM4	0.600127	0.602013	3.52699	0.0618247	0.587761
CASP4	-0.341428	-0.341485	6.95361	0.061945	0.58833
EID2	0.484109	0.485082	4.1444	0.0620275	0.58833
OSER1	-0.4147	-0.415094	4.98973	0.0620352	0.58833
LRRCC1	-0.526507	-0.527637	3.8265	0.0621133	0.588595
LACC1	-0.396436	-0.396644	5.41793	0.0622847	0.588879
GAS2L3	-0.423723	-0.424339	5.31262	0.0623212	0.588879
MT-ND6	-0.35956	-0.359588	8.61858	0.0623482	0.588879
VAMP4	-0.373971	-0.374168	5.7261	0.0625194	0.588879
MED26	-0.811238	-0.816374	2.56723	0.0625222	0.588879
CCDC137	0.43161	0.432187	4.9421	0.0625332	0.588879
PSG2	-0.678102	-0.681797	3.327	0.0625429	0.588879
CNEP1R1	-0.450621	-0.451282	4.56645	0.0625451	0.588879
PGM1	-0.357727	-0.357842	6.40791	0.0626496	0.589389
ZNF92	0.808312	0.814909	2.48074	0.0627759	0.589919
RPS6KA1	-0.601283	-0.602677	3.00959	0.0628066	0.589919
VWDE	0.887513	0.893354	2.1015	0.0628732	0.590072
TAB3	-0.396376	-0.396632	5.31734	0.0631247	0.591784
AREG	0.6422	0.643673	2.98097	0.0632326	0.591784
MICA	-0.417162	-0.417582	4.81517	0.0632496	0.591784
ZNF567	-1.00733	-1.01766	1.9131	0.0633568	0.591784
CHMP6	0.576386	0.57793	3.66948	0.063357	0.591784
NCAM2	0.523879	0.524716	3.71381	0.0633585	0.591784
CADM4	-0.494381	-0.495119	3.55055	0.0634775	0.592423
RGMB-AS1	0.865678	0.878211	3.44128	0.0636372	0.593441
ING5	0.445284	0.445809	4.68191	0.063768	0.594188
RIPK2	-0.373816	-0.373964	5.92845	0.0639597	0.595466
VKORC1	-0.614344	-0.616457	3.34646	0.0640261	0.595466
MON1A	0.438803	0.43942	4.45968	0.0640576	0.595466
SRRT	0.36619	0.366355	6.56917	0.0641928	0.59625
EXOSC1	-0.434574	-0.435057	4.61302	0.0642616	0.596417
C1D	-0.455365	-0.455963	4.4765	0.0643626	0.596425
COL11A1	0.454584	0.454921	4.60681	0.0643642	0.596425
KIT	3.36177	1.44269e+08	0.423059	0.0645369	0.596927
RINT1	-0.417415	-0.417785	5.02371	0.0645594	0.596927
TLE4	-0.384033	-0.384271	5.70397	0.0645712	0.596927
PBLD	0.60253	0.604736	3.15977	0.0647072	0.597645
MIR137HG	0.625447	0.6271	3.51866	0.0647509	0.597645
TARBP1	0.385968	0.386224	5.44023	0.064825	0.597851
PLEKHA8	-0.514877	-0.515822	4.08867	0.0648752	0.597851
SENP7	0.464575	0.465352	4.21329	0.0650296	0.598803
SH3GL1P3	1.42006	1.45472	1.20043	0.0650952	0.598937
FAR1	0.357637	0.357751	6.79619	0.0651751	0.599202
ADAL	-0.547643	-0.549093	3.60944	0.0652699	0.599453
MOXD1	-0.406707	-0.407058	5.14131	0.0653448	0.599453
SLC4A2	0.340144	0.340208	7.28406	0.0653558	0.599453
ISOC1	-0.418129	-0.418576	4.6456	0.065478	0.599828
FAM189B	0.3563	0.356431	6.31019	0.0654991	0.599828
GRIPAP1	0.380971	0.381175	5.59309	0.0656131	0.600404
SERTAD4	-3.12933	-1.44269e+08	1.28663	0.0657586	0.601265
MTLN	0.647119	0.649815	2.96376	0.0663807	0.606209
HIC1	0.358534	0.358655	6.58326	0.0664474	0.606209
DCP1B	-0.495646	-0.496655	3.82661	0.0664545	0.606209
CCDC186	-0.400049	-0.40034	5.1935	0.0665299	0.606425
RUNX1	-0.347411	-0.347501	6.81481	0.0666467	0.606847
ZNF639	-0.409053	-0.409517	4.88784	0.0666796	0.606847
SNHG15	0.469016	0.469873	4.2301	0.0670246	0.609513
NPL	1.03137	1.0443	1.43785	0.0671169	0.609879
SCAND2P	0.612106	0.614222	3.11949	0.0674049	0.611227
PSMG4	0.503013	0.504209	3.74886	0.067419	0.611227
CDC42EP5	0.466735	0.467224	4.31196	0.0674216	0.611227
DNER	0.375668	0.375884	6.42832	0.0675649	0.612052
STEAP2	0.485925	0.48658	4.2768	0.0676195	0.612074
TTC30A	0.912498	0.919705	2.33293	0.0678427	0.61301
MRPL36	-0.459262	-0.460137	4.59006	0.0678616	0.61301
C8orf34	1.46295	1.51264	0.780025	0.0679422	0.61301
HNRNPA1L2	0.861108	0.868236	2.25029	0.0679535	0.61301
UBE2D4	-0.716018	-0.719053	2.49332	0.0679984	0.61301
ERCC6L	-1.02433	-1.04672	3.58496	0.0680486	0.61301
RRP15	0.393738	0.394106	5.28154	0.0681729	0.61301
NOC4L	0.491812	0.492811	4.02215	0.068207	0.61301
DDX19B	0.642103	0.644122	3.31327	0.0683077	0.61301
RNF135	0.467752	0.468345	4.4335	0.0683151	0.61301
SMPD1	-0.337296	-0.337357	7.20081	0.0683803	0.61301
ZNF273	1.67303	1.76536	0.973091	0.0684253	0.61301
CCS	0.446515	0.447043	4.44091	0.0684495	0.61301
EDEM2	-0.434211	-0.434739	4.53654	0.0684551	0.61301
COL7A1	0.36258	0.362664	6.75825	0.0687514	0.615194
TTC30B	1.53827	1.60957	0.972305	0.0688479	0.615588
MST1	1.16339	1.18142	1.17315	0.068921	0.615772
IL10RB	-0.393896	-0.394204	5.06827	0.0689841	0.615792
CDK18	-0.970181	-0.978592	1.30471	0.0690375	0.615792
RPL3P4	0.691085	0.693672	2.91187	0.0691319	0.615792
INSIG1	-0.327742	-0.327819	8.12161	0.069165	0.615792
PHLPP1	0.686373	0.689968	3.08202	0.069197	0.615792
CMBL	-0.42739	-0.427802	4.57569	0.0692385	0.615792
ANO8	0.480959	0.48196	4.13438	0.0693387	0.616215
PSMB10	-0.620036	-0.622204	3.07518	0.0696718	0.618562
TRAF3IP1	-0.454163	-0.454911	4.20594	0.0697462	0.618562
FARS2	0.634363	0.637506	3.3051	0.0697952	0.618562
CUEDC1	-0.404254	-0.404667	5.6381	0.0698238	0.618562
PRIM1	1.72367	1.84763	2.26069	0.0698665	0.618562
NUTM2B-AS1	-0.817012	-0.823532	2.1516	0.0701191	0.620329
ENTPD5	0.418481	0.418913	4.80253	0.0702636	0.620756
VSIG10	0.466951	0.468087	4.45099	0.0703171	0.620756
RPRD1A	-0.344674	-0.344759	6.77208	0.0703597	0.620756
LTBP2	0.375325	0.375579	5.94705	0.0703792	0.620756
EBI3	-0.391255	-0.39147	4.87911	0.0705338	0.621187
SUOX	0.55803	0.559443	3.59485	0.0705545	0.621187
PDCD11	0.358528	0.358657	6.38173	0.0706148	0.621187
AMPD3	-0.468067	-0.469127	4.10216	0.07064	0.621187
ANKS3	0.439921	0.440581	4.20081	0.0707574	0.62156
CHAF1B	0.617827	0.622125	4.05714	0.0707885	0.62156
FLI1	-0.564596	-0.566482	3.57096	0.0708579	0.621704
TMEM147-AS1	0.846112	0.852593	2.1253	0.0709174	0.62176
SLC1A2	1.34954	1.38657	1.32464	0.0709837	0.621876
MASP2	-1.09025	-1.10386	1.28546	0.071189	0.622861
LYSMD2	-0.446693	-0.447356	4.37132	0.0712414	0.622861
YIPF1	0.43077	0.431337	4.41421	0.0713049	0.622861
CSMD1	-0.838696	-0.843254	1.83782	0.0713697	0.622861
INAFM1	0.434452	0.434997	4.63292	0.0714014	0.622861
NOC2L	0.348098	0.348225	6.63347	0.0714149	0.622861
LINC01963	-0.679526	-0.684112	3.43157	0.0715449	0.623299
PCDHGA2	-1.00141	-1.01104	1.80738	0.0715714	0.623299
SUSD1	-0.428118	-0.428699	4.56105	0.0718967	0.624964
STXBP5-AS1	-0.846729	-0.85327	2.28876	0.0719139	0.624964
TBL3	0.375247	0.375481	5.61535	0.0719225	0.624964
CHML	0.442391	0.443387	5.40411	0.0720614	0.625155
DUT	0.358958	0.359173	6.19176	0.0720978	0.625155
FANCE	0.380697	0.380908	5.39235	0.0721842	0.625155
AASS	0.363195	0.363319	6.19891	0.0722067	0.625155
HOMER1	0.431097	0.431617	4.23628	0.0723437	0.625155
CCNYL2	1.01538	1.02571	1.50042	0.0723652	0.625155
ZNHIT2	0.596627	0.598499	3.23379	0.0724065	0.625155
DNAH8	1.96546	2.15942	1.31164	0.07241	0.625155
MRPS5	0.377628	0.377871	5.68742	0.0724363	0.625155
FHDC1	-1.06819	-1.08168	1.26173	0.0724779	0.625155
HCN2	0.781893	0.786794	2.78785	0.0727909	0.627328
UTP20	0.360902	0.361114	6.10961	0.0729079	0.627328
SCCPDH	0.366128	0.36636	5.76102	0.0730061	0.627328
STX3	-0.391852	-0.392153	4.95417	0.0731535	0.627328
SLC47A1	-0.99243	-1.00303	1.06473	0.0731683	0.627328
PRDM5	0.513647	0.515037	3.55701	0.0732116	0.627328
MIR181A2HG	0.980513	0.989947	1.55028	0.073233	0.627328
TRMT10B	0.73148	0.735833	2.69658	0.073283	0.627328
MAST4	0.425553	0.426198	4.44688	0.0733214	0.627328
LINC01278	-0.502038	-0.50308	4.09662	0.0733231	0.627328
PLEKHM3	0.667617	0.670358	2.893	0.0733544	0.627328
ZNF286B	1.21229	1.23643	1.05428	0.073372	0.627328
A1BG-AS1	-0.923833	-0.93356	1.83904	0.0734397	0.627449
EPHX4	-0.82171	-0.827445	2.52271	0.0735322	0.627782
TVP23C	-0.771656	-0.775653	2.2704	0.0736426	0.628267
FAM156B	0.938824	0.947408	2.10793	0.0737301	0.628508
ZNF266	0.500926	0.501944	3.99631	0.0737781	0.628508
TASP1	0.658597	0.661659	2.96173	0.0740228	0.629271
LMAN2	-0.328711	-0.328771	7.26818	0.0740286	0.629271
SPAG4	0.651561	0.65403	2.77697	0.0740288	0.629271
SEMA4B	-0.395628	-0.395936	4.70429	0.0741108	0.629512
RAD54L	1.01012	1.03532	3.31476	0.074219	0.629975
CGAS	0.504472	0.505828	3.74418	0.0743442	0.630205
GM2A	-0.387706	-0.387987	5.32083	0.0743537	0.630205
DBF4B	0.616737	0.620251	3.60537	0.0745401	0.630903
PLEKHA4	-0.450204	-0.450848	4.30497	0.0745558	0.630903
FAM172A	0.392332	0.392688	5.10279	0.0745975	0.630903
TMEM106C	-0.395824	-0.396273	5.37422	0.0746977	0.631295
CPT1C	0.426041	0.426581	4.38429	0.0748035	0.631734
FAM174A	-0.402953	-0.403296	4.73143	0.0749741	0.632311
GLIS3	-0.36913	-0.369344	5.53827	0.0749797	0.632311
STK26	-0.396791	-0.397152	4.86516	0.0755033	0.636269
SIPA1	0.338375	0.338453	6.73957	0.0756837	0.637331
TUBA4A	-0.669415	-0.672062	2.68471	0.0757387	0.637336
ZFYVE19	0.445605	0.446145	4.5291	0.0758911	0.638078
ZNF319	-0.461836	-0.462653	4.12583	0.0759357	0.638078
SLC38A6	-0.736025	-0.740895	2.81072	0.0760303	0.638415
RALA	-0.354289	-0.354447	5.98141	0.076129	0.638786
LSM14B	-0.375392	-0.375643	5.5134	0.0763319	0.640031
TMTC1	0.35218	0.352261	6.88478	0.0765148	0.641105
PIGP	-0.611052	-0.613466	3.15941	0.0766752	0.641991
KIAA1549	-0.425894	-0.426341	4.56944	0.0768312	0.642192
ZNF629	0.440067	0.440826	4.30601	0.0768378	0.642192
MAP3K8	-1.51344	-1.57902	0.799775	0.0768636	0.642192
ZMIZ1-AS1	-1.24395	-1.27952	1.2897	0.0770356	0.642644
BCL7A	0.395157	0.3955	4.97685	0.0770707	0.642644
OTUD6B-AS1	0.421648	0.422253	4.6066	0.0771273	0.642644
TOE1	0.609498	0.612578	3.45567	0.077137	0.642644
KIF18B	-0.66177	-0.667213	4.79963	0.0773848	0.643941
CENPA	-0.758791	-0.765975	3.55763	0.0774026	0.643941
BSN	0.951093	0.960624	1.70013	0.0774762	0.644096
NRAV	1.28582	1.31843	1.65151	0.077592	0.644602
DNA2	0.801514	0.810654	3.1872	0.0778057	0.64592
PXMP4	-0.790734	-0.796573	2.51534	0.0780706	0.647339
CCT6P3	-1.1329	-1.15863	1.23984	0.0780871	0.647339
MYEF2	-0.632778	-0.634677	3.02631	0.0783922	0.64935
GLE1	0.423733	0.424548	4.93091	0.0784405	0.64935
ST3GAL1	-0.359082	-0.359232	6.1022	0.0785509	0.649581
PTK7	-0.336676	-0.336764	6.43838	0.0785792	0.649581
DMPK	0.373375	0.373571	5.59284	0.0788335	0.651224
ZNF513	-0.427593	-0.428198	4.29432	0.0790216	0.652317
POFUT2	-0.334508	-0.334587	6.76783	0.0791622	0.652495
MTURN	0.544116	0.545451	3.92284	0.079183	0.652495
COQ3	-0.80842	-0.816058	2.5927	0.07921	0.652495
FOXK2	-0.338855	-0.338955	6.51408	0.0793115	0.652872
WIPI1	-0.347797	-0.34791	6.31114	0.0793816	0.65299
BICD1	-0.370958	-0.371227	5.36428	0.079649	0.654731
VCL	0.313636	0.313655	9.10111	0.0798013	0.655102
PWWP2A	-0.474773	-0.475775	4.22564	0.079806	0.655102
PRPF6	0.349451	0.349589	6.48632	0.0800197	0.656397
ZNF680	-0.920841	-0.931271	1.70307	0.0801644	0.657124
SPAG5	0.45146	0.452973	5.50968	0.0804604	0.658785
ATP6V0E2	0.932278	0.941098	1.50891	0.0804836	0.658785
CHEK1	0.40203	0.402452	5.28261	0.0806024	0.658785
PLSCR4	-0.503824	-0.504897	3.74046	0.0806732	0.658785
ZNF543	-0.944452	-0.956846	1.69716	0.0806824	0.658785
RNASEH2A	0.489293	0.491053	5.07495	0.0807042	0.658785
COX6A1	-0.395877	-0.396343	4.71411	0.0808382	0.658844
GTDC1	-0.42008	-0.420621	4.30457	0.080964	0.658844
CHAC2	0.849864	0.860233	2.67895	0.0809794	0.658844
NAA80	0.722815	0.727281	2.53301	0.0809874	0.658844
BORA	-0.693581	-0.697935	3.12076	0.0809926	0.658844
DDX12P	1.08692	1.10796	2.39639	0.0812538	0.659891
SERPINA9	-3.13148	-1.44269e+08	1.33727	0.0812719	0.659891
TXNRD1	-0.318289	-0.318333	8.50167	0.0812901	0.659891
TLR6	0.846155	0.853837	2.75276	0.0813464	0.659891
CXCL3	-0.502215	-0.503256	3.2677	0.0815838	0.66136
SFXN5	0.702269	0.706331	2.78138	0.0817712	0.662146
SLC35E3	-0.636471	-0.639779	3.44215	0.0817938	0.662146
CFAP70	-1.18523	-1.2068	0.618777	0.0818563	0.662194
GPR153	-0.445708	-0.446225	4.19777	0.0819327	0.662355
ENO2	-0.364189	-0.364424	5.6906	0.0822002	0.664059
ZNF783	0.490491	0.491571	3.63957	0.0824505	0.665438
SLC7A2	0.330282	0.330369	7.71352	0.0824843	0.665438
PXDN	-0.309526	-0.30954	9.64463	0.082564	0.665623
ZNF143	-0.46997	-0.471032	3.77583	0.0826525	0.665878
PPIH	0.510647	0.51221	3.85886	0.0829265	0.667627
ZNF823	1.45736	1.52648	1.55255	0.0830395	0.667976
JKAMP	-0.357903	-0.358107	5.82632	0.0830839	0.667976
AZIN2	0.506815	0.507977	3.3532	0.0833185	0.669403
SEC11C	-0.467686	-0.468743	3.98391	0.0834495	0.669997
AMZ2P1	-1.12477	-1.15044	1.40242	0.0835972	0.670723
ASF1A	-0.444683	-0.44543	4.59102	0.0836569	0.670743
EPB41L4A-AS1	0.505513	0.506642	3.5574	0.0837529	0.670973
TNFAIP3	-0.410028	-0.410531	4.80445	0.0838104	0.670973
FOXF2	0.356625	0.356937	6.24747	0.0838935	0.670973
ARRB1	-0.821387	-0.826878	1.77607	0.0839155	0.670973
ANXA9	0.97496	0.985848	1.81403	0.084005	0.670973
GSTA4	-0.541581	-0.543325	3.34975	0.0840933	0.670973
GMCL1	-0.402056	-0.402368	5.08365	0.0841174	0.670973
DYNLRB1	-0.341899	-0.342036	6.44026	0.0841435	0.670973
EBF4	-1.03545	-1.04807	1.03857	0.0843065	0.671815
NOP2	0.373803	0.374084	5.61667	0.0846208	0.673541
CEMIP	-0.817905	-0.831297	3.61925	0.084717	0.673541
THUMPD2	-0.483734	-0.484875	3.61441	0.084827	0.673541
HNRNPA1P48	0.983289	0.995216	2.01338	0.0848316	0.673541
WDR90	0.497065	0.498227	4.06048	0.0849048	0.673541
OR2W3	0.442282	0.442934	4.09016	0.0849085	0.673541
ZNF703	0.377555	0.37789	5.30065	0.0849593	0.673541
SETD4	0.503047	0.504168	3.78665	0.0849827	0.673541
TRNAU1AP	-0.488021	-0.489419	3.92957	0.0851816	0.674622
FAM222B	-0.383561	-0.383903	4.89997	0.0852924	0.674622
DDX28	0.776206	0.780274	2.78734	0.0853122	0.674622
METTL21A	-0.646551	-0.648887	2.86586	0.0853493	0.674622
CELSR3	0.337979	0.338118	6.41498	0.0854094	0.674642
AGFG2	0.503992	0.505556	3.9149	0.0855346	0.674696
DNAH1	0.448894	0.449466	3.88393	0.0855728	0.674696
TMEM200A	-0.374	-0.374338	5.97012	0.0855889	0.674696
LINC00339	-0.836874	-0.843921	2.39166	0.0858078	0.675671
PPDPF	-0.321278	-0.321337	7.21519	0.0858279	0.675671
SLC25A28	-0.409826	-0.410334	4.49577	0.0860594	0.676971
URB2	0.450233	0.451075	4.34783	0.0861085	0.676971
ABHD8	-0.414941	-0.415432	4.31299	0.0862527	0.67765
THG1L	0.688716	0.691968	2.85361	0.0863763	0.678167
MFSD2A	-0.562548	-0.564649	3.33154	0.0865099	0.678265
NRDE2	0.484877	0.485743	3.77129	0.086522	0.678265
USP13	0.358172	0.358423	6.03282	0.0866741	0.678265
CRLS1	-0.367826	-0.368068	5.38572	0.0867378	0.678265
FPGS	0.341618	0.341764	6.14075	0.0867798	0.678265
PLXNA3	-0.325268	-0.325324	7.18169	0.0867852	0.678265
KCNE4	0.354015	0.354179	6.07954	0.0867938	0.678265
ANKRD33B	1.12086	1.13835	1.68669	0.0869299	0.678876
PIK3R1	0.370246	0.370541	5.47922	0.0872525	0.680941
ALPL	1.53652	1.60781	0.813841	0.0873606	0.681331
HIST1H1C	-0.778573	-0.784891	2.26496	0.0874563	0.681624
OSGIN1	-0.553306	-0.555939	3.47208	0.0877194	0.683175
EFCAB11	-0.985401	-0.998166	1.94269	0.087861	0.683175
CROCCP3	0.668874	0.671959	2.85919	0.0879347	0.683175
COX18	-0.408973	-0.409417	4.71395	0.0879456	0.683175
TEAD4	0.47595	0.477108	4.02715	0.0879467	0.683175
SSR4	-0.341435	-0.341545	6.33213	0.0880825	0.683777
TSHZ3	0.375049	0.375395	5.35691	0.0881755	0.684046
C9orf16	0.393935	0.394258	4.87945	0.0882704	0.684329
MRPL16	0.405782	0.40633	4.73122	0.0884099	0.684957
TENT4A	-0.363604	-0.363884	5.6531	0.0886216	0.686144
MAP7D3	-0.372929	-0.373249	5.23758	0.0888781	0.687676
FABP4	-1.94231	-2.15542	1.25651	0.0889782	0.687997
NTM	0.426631	0.427236	4.1833	0.0891879	0.688696
PSMA3-AS1	0.403651	0.404133	4.824	0.0892546	0.688696
INPP5B	0.407564	0.408055	4.6699	0.0892642	0.688696
EML5	-0.885646	-0.896138	1.83347	0.0893047	0.688696
CHSY3	-0.418565	-0.419033	4.53158	0.0893624	0.688696
CYB5R2	0.435284	0.436114	4.01366	0.0896777	0.690671
SPATA13	0.470028	0.471396	4.10632	0.0897939	0.691112
CROT	0.451853	0.452659	4.13161	0.0899432	0.691184
NDUFAF8	0.403415	0.403814	4.98273	0.0900242	0.691184
FBXO6	-0.774646	-0.780117	1.85065	0.090035	0.691184
AAAS	0.379825	0.380209	5.12044	0.0900463	0.691184
ZNF497	1.16671	1.18493	1.11799	0.0901205	0.691184
NLRX1	0.401624	0.401977	4.65669	0.090157	0.691184
FAM13B	0.369897	0.370212	5.22165	0.0902611	0.691302
NRF1	0.466984	0.468166	3.84524	0.0903145	0.691302
TMEM25	0.603197	0.605417	3.0591	0.0904096	0.691302
SLC45A3	-0.70656	-0.711886	2.54577	0.0904454	0.691302
CENPQ	-0.650237	-0.653963	3.42166	0.0905481	0.691302
HHAT	-0.582897	-0.584835	3.08573	0.0905507	0.691302
GBP2	-0.476771	-0.477203	4.3844	0.0906314	0.691302
SGCE	-0.353546	-0.353723	5.77143	0.090674	0.691302
PDIA5	-0.356653	-0.35683	5.58611	0.0907074	0.691302
DIAPH2	0.348213	0.348363	6.03669	0.0907622	0.691302
TMEM178B	1.16154	1.18932	1.48498	0.0909038	0.691931
NPDC1	0.341766	0.341881	6.37727	0.0911655	0.693473
EXOG	0.430675	0.431583	4.28396	0.0912516	0.693678
PHLDA2	-0.342431	-0.342604	6.13997	0.091318	0.693733
PRKRA	-0.366615	-0.366843	5.34742	0.0917582	0.695792
PIGA	-0.644185	-0.647573	3.04504	0.09181	0.695792
GPATCH4	0.385668	0.386095	5.11514	0.0918813	0.695792
ABCA2	0.322595	0.322662	6.90398	0.0919261	0.695792
MAEA	0.344486	0.344654	6.20505	0.0919336	0.695792
UBE2T	-0.542187	-0.545169	4.29171	0.0919552	0.695792
DOT1L	0.34848	0.348668	5.9496	0.0920045	0.695792
CHRNB1	-0.921736	-0.932186	1.38497	0.092159	0.696461
OSER1-DT	1.26306	1.28802	1.13327	0.0922118	0.696461
EEF1A1P13	1.0484	1.0653	1.14628	0.0923282	0.69688
CLASRP	0.368819	0.369128	5.20035	0.0923862	0.69688
RBM24	-0.397325	-0.397814	4.68422	0.0925167	0.697415
KRT81	1.09171	1.11417	0.924759	0.09263	0.697739
RCAN2	-0.781148	-0.785774	2.31722	0.0926787	0.697739
ZNF117	-0.915221	-0.924587	1.76783	0.0928898	0.698601
STPG1	-0.475186	-0.476817	3.87013	0.0929124	0.698601
TUBA1B	-0.323681	-0.323755	8.427	0.092985	0.698699
SPAG9	-0.324121	-0.324192	7.14175	0.0931578	0.698953
PHPT1	-0.341592	-0.341748	5.89359	0.0932942	0.698953
USP46-AS1	-1.37953	-1.43318	1.07143	0.0933061	0.698953
DHODH	0.692137	0.696937	2.66993	0.0933155	0.698953
PUS7L	-0.411948	-0.412548	4.59197	0.093317	0.698953
TRIM27	-0.408657	-0.409293	4.30832	0.0934279	0.699337
KRTAP1-5	2.2683	2.65353	0.817917	0.0935214	0.69959
UBTF	0.332806	0.332921	6.72252	0.0936842	0.70014
GTSE1	0.517924	0.521145	5.44387	0.0937144	0.70014
PIF1	0.58435	0.587348	3.5531	0.0938036	0.70036
APRT	0.363285	0.363555	5.59625	0.0940185	0.701393
ZNF302	-0.461686	-0.462726	3.89706	0.0940616	0.701393
GEMIN6	0.537939	0.539367	3.59813	0.0942473	0.701933
TKFC	0.468805	0.469612	4.0773	0.0943024	0.701933
HSPBAP1	0.743349	0.748454	2.33078	0.0943136	0.701933
SLC41A3	-0.382646	-0.38304	5.21923	0.0943783	0.701968
RTEL1-TNFRSF6B	1.11461	1.13321	1.39955	0.0944388	0.701973
RFC4	0.528031	0.530295	4.19254	0.0945535	0.70238
INKA1	-1.18984	-1.21858	1.27618	0.0947771	0.703595
LRRC37A4P	-1.13428	-1.1646	1.26561	0.0949859	0.704699
APTR	0.768328	0.773358	2.43017	0.0951469	0.705447
TMEM100	1.16773	1.18818	0.997006	0.095327	0.705813
OSBP2	0.928792	0.938595	1.46759	0.0953482	0.705813
APOL2	-0.35744	-0.357681	5.48684	0.0953769	0.705813
C17orf51	-0.352884	-0.353073	5.52035	0.0954869	0.706182
LINC02056	-1.08841	-1.10568	2.34992	0.0956285	0.706504
BBS12	-0.664102	-0.667974	2.67115	0.0956511	0.706504
ARAP3	0.351383	0.351585	5.89649	0.0957565	0.706837
POLDIP3	0.339561	0.339705	6.2022	0.0958199	0.70686
SLC35D1	-0.311917	-0.311946	7.58893	0.095981	0.707182
REC8	-0.523411	-0.524578	3.2691	0.0960484	0.707182
METTL7A	1.23315	1.27831	2.22341	0.0960684	0.707182
TENM3-AS1	0.782622	0.789708	2.25594	0.0961049	0.707182
PC	0.394395	0.394955	4.7281	0.096469	0.709085
WNT5A-AS1	0.399165	0.399777	4.83173	0.0964844	0.709085
HTR1F	-1.04541	-1.06653	2.07243	0.0965851	0.70938
SCLY	1.07559	1.09795	1.33363	0.0967084	0.709575
MDC1	-0.559319	-0.561908	3.2793	0.0967875	0.709575
NIT1	-0.396976	-0.39747	4.55015	0.0967932	0.709575
ORC6	0.660337	0.668185	4.15758	0.0970181	0.710779
STAT4	-0.91525	-0.925997	1.10704	0.0970882	0.710848
CRYZ	-0.341542	-0.341744	5.97466	0.0972021	0.711216
UBE2E1	-0.346987	-0.347147	5.96282	0.0972598	0.711216
PHLDB3	-0.451183	-0.451894	3.62689	0.0975158	0.712256
FZD2	0.371129	0.371562	4.98579	0.0975236	0.712256
ZNF605	0.429805	0.43057	3.81114	0.0976868	0.713004
ZNFX1	-0.325846	-0.325922	6.87138	0.0978604	0.713144
RAMAC	-0.735333	-0.74028	2.29251	0.097945	0.713144
TNFRSF1B	-0.323402	-0.323459	6.95089	0.098019	0.713144
TWIST2	0.603031	0.605676	3.28707	0.0980213	0.713144
MTG1	0.823933	0.830324	2.24126	0.098135	0.713144
IRS2	0.328625	0.328725	6.56496	0.0981962	0.713144
S100A4	1.1358	1.15171	1.35196	0.0982139	0.713144
STARD8	0.719813	0.724674	2.66643	0.0984331	0.713144
PNPT1	-0.350566	-0.350759	5.63898	0.098461	0.713144
TESK1	-0.361032	-0.361313	5.0936	0.0985946	0.713144
TXNDC11	-0.355418	-0.355661	5.52495	0.0985951	0.713144
GALNT11	0.353852	0.354097	5.38008	0.0986435	0.713144
NDOR1	0.437032	0.437871	4.47396	0.0986475	0.713144
ELF4	-0.340945	-0.341089	6.01763	0.0986509	0.713144
MTRNR2L12	-0.937226	-0.947827	1.49212	0.0986772	0.713144
ILK	1.1658	1.1936	1.28767	0.0986793	0.713144
NR2F1-AS1	0.555752	0.558035	3.32282	0.0987877	0.713381
ZNF469	0.802192	0.813983	3.12	0.0988339	0.713381
SEMA7A	-0.317441	-0.317496	7.80518	0.0989842	0.714026
SLC19A1	0.414884	0.415709	4.43303	0.0990939	0.714378
NAT14	0.387253	0.387691	4.65651	0.0993796	0.715642
COG4	0.340117	0.340305	6.02971	0.0993914	0.715642
CHMP2B	-0.342146	-0.342306	5.91624	0.0995723	0.716385
TUT1	0.621038	0.623517	2.89105	0.0996744	0.716385
SMCO4	-0.609401	-0.61191	2.68746	0.0996778	0.716385
MIR4435-2HG	-0.338101	-0.338278	5.9968	0.0999887	0.718179
TMEM106A	-0.420116	-0.420704	4.16042	0.100172	0.718265
RBAK	0.417553	0.418275	4.13064	0.100273	0.718265
ZNF862	0.597291	0.599464	2.82977	0.100324	0.718265
ALKBH2	0.658244	0.661499	3.04604	0.100335	0.718265
ADAT2	0.462418	0.463388	3.59128	0.100354	0.718265
SIRT7	0.425619	0.426197	4.44655	0.100419	0.718265
THOC1	0.415325	0.415974	4.46339	0.10043	0.718265
KIF13B	0.371441	0.37176	4.98656	0.100565	0.718318
RAB2A	-0.311527	-0.31157	7.82041	0.100595	0.718318
NOMO2	-0.336506	-0.336636	5.96435	0.100621	0.718318
TUBB4B	-0.305329	-0.30536	8.89245	0.100697	0.718408
NDUFC2	0.43794	0.438911	4.04548	0.100778	0.718408
DLGAP1-AS1	0.826445	0.83335	1.81877	0.100868	0.718408
HMBS	0.385227	0.385728	4.81822	0.100879	0.718408
ARL2BP	-0.339655	-0.339802	5.97544	0.101269	0.720749
IMMP2L	0.55571	0.557654	2.94346	0.101346	0.720863
TEX30	-0.492032	-0.493763	3.73341	0.101532	0.721571
TSR3	0.355451	0.355618	6.04629	0.101569	0.721571
EIF1B	-0.351528	-0.351712	5.54891	0.10169	0.72199
NXT2	0.758045	0.765887	2.61173	0.101778	0.722181
CLHC1	0.67609	0.679218	2.71683	0.101929	0.722816
SH2D4A	-0.452608	-0.453788	4.17698	0.102066	0.723026
MIR503HG	0.456816	0.457658	3.89652	0.102174	0.723026
ZNF37BP	0.479268	0.480648	3.97682	0.102208	0.723026
TTTY14	0.892156	0.902007	1.79003	0.102264	0.723026
LINC00941	-0.883682	-0.897126	2.26006	0.102267	0.723026
SORBS3	0.325458	0.325573	6.87869	0.102437	0.723787
PRDX4	-0.317742	-0.317813	6.87126	0.102671	0.725004
ZNF236-DT	1.36926	1.42517	0.999817	0.10289	0.725269
NDUFAF3	-0.363828	-0.364195	5.17742	0.102902	0.725269
AMACR	0.972284	0.988356	1.35365	0.102908	0.725269
QPRT	-0.518076	-0.519657	3.20843	0.102956	0.725269
RPSA	0.303942	0.303963	9.14233	0.103021	0.725294
SUGT1P1	1.25003	1.27919	0.969519	0.103227	0.726303
RPP14	-0.400339	-0.40087	4.53484	0.103372	0.726893
PPP2R2D	-0.369021	-0.369428	4.96177	0.103823	0.729622
RBM28	0.337802	0.33798	5.77178	0.103987	0.730336
DGKG	-0.772335	-0.776996	2.08247	0.104195	0.731168
PTK2	-0.317932	-0.31802	6.87019	0.104263	0.731168
ALDH18A1	-0.320044	-0.320114	6.91897	0.10434	0.731168
MACROD2	-1.23221	-1.26438	0.714771	0.104354	0.731168
ARHGDIB	-0.402841	-0.403633	5.05906	0.104595	0.731816
CNNM1	0.76407	0.768749	2.30733	0.104613	0.731816
MRPL48	0.473955	0.475071	3.96541	0.104634	0.731816
SH2D5	-0.530086	-0.532511	3.8251	0.104716	0.731952
MPND	0.799146	0.807339	2.16898	0.1048	0.732099
UIMC1	-0.395412	-0.395961	4.5851	0.105016	0.733172
C8orf58	0.531687	0.533911	3.6334	0.105143	0.733428
B3GLCT	0.484088	0.485698	3.79165	0.105178	0.733428
HS3ST3A1	0.375865	0.376364	4.8407	0.105338	0.734106
VIM-AS1	-1.26457	-1.30026	0.767146	0.105521	0.734849
FANCM	-0.48469	-0.486383	3.59945	0.105659	0.734849
NKAPD1	-0.355883	-0.356172	5.14728	0.105682	0.734849
PDCL	-0.362802	-0.363164	5.0801	0.105695	0.734849
SNAP23	-0.342363	-0.342541	5.58792	0.105849	0.735392
RAB5IF	0.416039	0.416982	4.21628	0.105981	0.735392
NME1	0.369402	0.369822	5.13264	0.105995	0.735392
LRRC49	-0.559372	-0.561471	2.8333	0.106024	0.735392
DCTN1	0.312278	0.312311	8.02145	0.106607	0.739001
CEP135	0.41909	0.420114	4.47569	0.106745	0.739421
C6orf132	-0.420341	-0.421053	4.33749	0.106832	0.739421
TK1	-0.369628	-0.370519	6.4528	0.106936	0.739421
SYNPO2L	1.54625	1.63546	1.0293	0.106998	0.739421
TMEM140	-0.557495	-0.558998	3.42687	0.107076	0.739421
TMED9	-0.306393	-0.306422	8.19818	0.107224	0.739421
PDIK1L	-0.752567	-0.758405	2.0434	0.107228	0.739421
SLC13A5	-0.847137	-0.853836	1.39509	0.107236	0.739421
GCLM	-0.327055	-0.327273	6.67701	0.107236	0.739421
OXLD1	0.488311	0.489488	3.61715	0.107432	0.739442
SHISA5	-0.30902	-0.309056	7.71742	0.107485	0.739442
ST8SIA4	-0.830156	-0.834765	2.0004	0.10751	0.739442
WLS	-0.320407	-0.320495	6.60927	0.107548	0.739442
TXNRD3	0.435381	0.436028	3.95587	0.107601	0.739442
VPS28	0.334487	0.334658	5.85596	0.107749	0.739442
NSMCE1	0.357295	0.357594	5.19752	0.10775	0.739442
FAM86HP	-1.19522	-1.22973	1.20332	0.107767	0.739442
PIBF1	0.40204	0.402592	4.47677	0.107806	0.739442
DTYMK	0.358881	0.359357	5.69609	0.107901	0.739505
FRA10AC1	0.366347	0.366637	4.8917	0.107942	0.739505
C3orf38	-0.382542	-0.383013	4.62694	0.10822	0.74098
ZNF300P1	0.827465	0.837192	1.85625	0.108669	0.743429
RPAP1	0.351542	0.351788	5.33174	0.108705	0.743429
CCDC125	0.470872	0.472118	3.50905	0.108835	0.743884
TRIM58	0.323059	0.323132	6.89496	0.109263	0.746373
LINC02475	-0.406488	-0.407016	4.03828	0.109358	0.746558
RHPN2	0.966666	0.981597	1.55533	0.109475	0.746558
VEZF1	-0.338843	-0.33908	5.78923	0.109481	0.746558
FBXO34	-0.396174	-0.396603	4.76665	0.109875	0.748229
ZNF224	-0.7924	-0.799479	1.82976	0.109969	0.748229
MLXIP	0.308034	0.30807	7.80342	0.11008	0.748229
YLPM1	0.31999	0.320081	6.82839	0.110121	0.748229
TRAPPC2	0.521152	0.522703	3.45628	0.110153	0.748229
COX16	0.431049	0.432027	3.98841	0.110244	0.748229
GSE1	0.349947	0.350207	5.3258	0.110269	0.748229
SART1	0.335148	0.335267	6.55675	0.110271	0.748229
TMED2	-0.309719	-0.309756	8.11643	0.110339	0.748229
ANKIB1	-0.320907	-0.320985	6.86698	0.110364	0.748229
LINC02057	-0.701818	-0.705603	2.47744	0.110517	0.748834
CPQ	-0.383168	-0.383616	4.3208	0.110731	0.749848
DNAH11	-0.879144	-0.890904	1.62296	0.111042	0.750762
SPON2	0.372125	0.372778	5.16411	0.111079	0.750762
SERP1	-0.303961	-0.30399	8.07164	0.111113	0.750762
ALAD	0.349783	0.350074	5.5004	0.111122	0.750762
TMEM203	0.354073	0.354367	5.21444	0.111242	0.751142
AIP	0.338159	0.33835	5.73599	0.1114	0.75177
TMEM150A	0.393392	0.393968	4.16307	0.111642	0.752972
POU2F1	0.396856	0.397441	4.30595	0.112001	0.75496
HUS1	-0.422101	-0.422803	4.2004	0.112139	0.755459
PACS2	0.322616	0.32273	6.23113	0.112225	0.755602
MDM1	0.484405	0.485974	3.42929	0.112484	0.75691
RGL3	0.452823	0.453739	3.5411	0.112807	0.758303
SERP2	-1.01778	-1.03424	0.828482	0.112961	0.758303
TENM4	0.396706	0.397791	5.27147	0.112971	0.758303
PBDC1	0.393133	0.393743	4.39366	0.113004	0.758303
PAN3	-0.357051	-0.357439	5.0564	0.113014	0.758303
PDCD4	0.329806	0.329939	5.94181	0.113645	0.761013
ZNF22	0.398654	0.399474	4.23776	0.113666	0.761013
ZRSR2	-0.495958	-0.497261	3.42239	0.113744	0.761013
SERPINF1	1.00853	1.02257	1.23294	0.113794	0.761013
KCNK2	0.322142	0.322253	6.20301	0.113817	0.761013
EME2	0.646043	0.64943	2.75468	0.113839	0.761013
RAI1	0.317539	0.317619	6.60894	0.113887	0.761013
SMARCD3	0.361153	0.361558	4.87338	0.113956	0.761013
CIAPIN1	0.355477	0.355794	5.13172	0.114031	0.761013
KRCC1	-0.344358	-0.344597	5.38112	0.114068	0.761013
KCNS1	0.382031	0.382492	4.53875	0.114278	0.761985
IMPA2	2.26177	2.64693	0.52618	0.114956	0.76527
TCP11L2	-0.636509	-0.639257	2.6545	0.11501	0.76527
PTGER4	1.21043	1.26219	1.97731	0.115099	0.76527
SYNGR1	0.450631	0.451552	3.55158	0.115153	0.76527
CENPH	0.568065	0.571992	3.93959	0.115162	0.76527
IFIT5	-0.335297	-0.335482	5.69414	0.115163	0.76527
ZFP36	-0.341669	-0.341916	5.44394	0.115343	0.766034
CDR2	-0.345621	-0.345852	5.25628	0.115548	0.766537
LRRN3	-0.667692	-0.672037	2.41412	0.11559	0.766537
ALKBH5	-0.315331	-0.315418	6.59501	0.115615	0.766537
AKNA	-0.399248	-0.399709	4.3194	0.116041	0.76893
ZBTB25	0.430217	0.43098	3.89343	0.116225	0.769712
ARHGAP33	0.706242	0.713668	3.04703	0.116474	0.770117
SEMA3B	-0.649227	-0.651699	2.31678	0.116482	0.770117
FGFRL1	-0.373099	-0.373553	4.44564	0.116483	0.770117
SASS6	-0.665223	-0.670667	3.00418	0.116608	0.770455
RTN2	0.529217	0.530848	3.57493	0.116666	0.770455
ACER3	0.360286	0.360731	5.02649	0.11678	0.770776
CASP8AP2	0.404047	0.404581	4.93095	0.116909	0.771192
TRMT112	0.318674	0.318783	6.49636	0.117173	0.7725
MSRA	0.674634	0.677702	2.44674	0.117412	0.773239
RPN1	-0.30137	-0.301402	8.27271	0.117446	0.773239
MYBL1	-0.369091	-0.369772	5.10167	0.117483	0.773239
CCDC102A	0.38605	0.386384	4.65386	0.117653	0.773918
RBM15	-0.414468	-0.415276	4.05943	0.117719	0.773922
MCM7	0.340566	0.341017	6.72064	0.1178	0.77402
HOXB-AS2	0.684308	0.689081	2.15796	0.117936	0.774453
FDX1	0.351269	0.351528	5.31598	0.117998	0.774453
ZNF776	0.615145	0.618426	2.97009	0.118174	0.774598
PLEKHA7	0.339025	0.339333	5.78654	0.118191	0.774598
EVI2A	-1.44409	-1.52084	1.04524	0.118255	0.774598
MC1R	0.814474	0.822726	1.90825	0.118285	0.774598
HDAC9	-0.384795	-0.385192	4.35425	0.118457	0.775293
IL4R	-0.358813	-0.359156	5.04478	0.11855	0.775428
EVC2	-0.39917	-0.39976	4.21897	0.118675	0.775428
TRNT1	0.391496	0.39201	4.46701	0.118676	0.775428
DUSP8P5	0.856819	0.86605	1.69179	0.118932	0.775955
TRIM41	0.374482	0.374947	4.69505	0.119103	0.775955
KIF4A	0.490139	0.49219	5.20988	0.119154	0.775955
PYCR3	0.487222	0.489027	3.60675	0.119181	0.775955
TMEM170A	-0.370524	-0.370909	4.59644	0.119238	0.775955
SUCO	-0.312982	-0.313078	6.6136	0.119245	0.775955
ABCA7	-0.607746	-0.610507	2.54357	0.11927	0.775955
USP12	-0.330434	-0.330602	5.95101	0.11935	0.775955
SLFN13	0.867927	0.877198	1.49168	0.119352	0.775955
ASAP3	0.592833	0.595171	2.55792	0.11952	0.776618
ARAP2	-0.36525	-0.36552	4.95406	0.119683	0.777168
AFAP1L1	-0.377242	-0.377702	4.51584	0.119738	0.777168
C11orf74	-0.573325	-0.575847	2.80245	0.120182	0.779622
WDHD1	-0.496145	-0.498893	4.59762	0.120318	0.779755
PLAU	0.367899	0.368588	4.97473	0.120336	0.779755
PROSER3	-0.388746	-0.389273	4.31624	0.120457	0.780108
DNAJC11	0.349329	0.349672	5.28758	0.120553	0.780297
HEMK1	0.374003	0.37454	4.3632	0.120852	0.781805
FAM114A2	-0.357977	-0.358315	4.99122	0.121041	0.782597
CCDC65	0.831915	0.838645	2.0404	0.121226	0.783078
PLD2	0.36716	0.367687	4.55269	0.12125	0.783078
SRP54	-0.313244	-0.313335	6.72303	0.1218	0.785899
POLE4	0.341275	0.341576	5.2576	0.121829	0.785899
RPUSD4	0.375002	0.375466	4.79712	0.121922	0.785899
NDUFV1	0.317093	0.317173	6.71962	0.121954	0.785899
RAD51AP1	-0.640114	-0.646429	3.65195	0.122195	0.787016
PCDHB7	-0.963749	-0.978063	1.04066	0.122322	0.787156
COG1	-0.32495	-0.325109	5.83176	0.122351	0.787156
ZNF764	-0.578801	-0.581522	2.78188	0.122536	0.787671
PIDD1	0.353343	0.353606	4.91496	0.122615	0.787671
LRRC8E	-1.19592	-1.22469	0.748046	0.122633	0.787671
PEX5	0.328635	0.328802	5.64346	0.122896	0.788028
EXT1	-0.309782	-0.309879	7.16848	0.122923	0.788028
DENND1B	-0.405863	-0.406562	4.32603	0.122933	0.788028
N6AMT1	0.407611	0.40823	4.4124	0.122978	0.788028
LAMP2	-0.304478	-0.30453	7.71828	0.123024	0.788028
DCPS	-0.539267	-0.541449	3.38396	0.123119	0.788203
TIGD5	-0.428249	-0.429143	3.83688	0.123394	0.789179
ZBTB48	0.467994	0.469091	3.52741	0.123518	0.789179
MELK	-0.398582	-0.399881	5.30346	0.123556	0.789179
MPZL1	-0.310382	-0.310451	7.21279	0.123578	0.789179
TRIP13	-0.401974	-0.403078	5.19296	0.123693	0.789179
DHRS7B	-0.585227	-0.588028	2.88349	0.123725	0.789179
NFATC3	-0.388325	-0.38888	4.41297	0.123826	0.789179
FARP1	0.300555	0.300599	7.69392	0.12384	0.789179
VPS26C	-0.328923	-0.329142	5.67259	0.123877	0.789179
SDHAF3	-0.63384	-0.637498	2.91699	0.124267	0.791234
TSLP	-0.660735	-0.663904	2.14867	0.124537	0.792523
ITPRIPL1	0.827179	0.83679	2.00096	0.124741	0.792919
RABIF	-0.477915	-0.479532	3.74016	0.124771	0.792919
SIGIRR	0.547425	0.549367	3.19201	0.124839	0.792919
TSPYL2	-0.330155	-0.330296	5.58578	0.124914	0.792919
LGR4	-0.356639	-0.357082	5.03981	0.124938	0.792919
MIF4GD	0.722487	0.727233	1.95552	0.125231	0.79435
SCARA3	-1.32797	-1.38872	1.15644	0.125548	0.795932
COBLL1	-0.336978	-0.33726	5.3925	0.125623	0.795975
TCF4	0.308018	0.308078	6.82315	0.125848	0.796971
DCAF1	0.338583	0.338874	5.39652	0.126127	0.797934
DNHD1	0.463498	0.464544	3.48016	0.126136	0.797934
APCDD1L-DT	-1.21343	-1.25192	1.61307	0.126207	0.79795
CRADD	-0.473085	-0.474307	3.28588	0.126446	0.79901
MECOM	0.435002	0.436251	3.99966	0.126718	0.79901
WNT5B	0.323642	0.323833	6.30648	0.126738	0.79901
SMARCA1	0.309218	0.309306	6.73778	0.126816	0.79901
TMEM42	0.374522	0.375032	4.25185	0.126833	0.79901
FLG-AS1	0.65322	0.656357	2.32124	0.126924	0.79901
IRF3	0.326208	0.326381	5.70549	0.127059	0.79901
CAMKK1	-0.581647	-0.584457	2.9849	0.127081	0.79901
DERA	0.34468	0.345018	5.37865	0.127148	0.79901
MED28	-0.331902	-0.332116	5.5467	0.127183	0.79901
IKZF4	-0.506355	-0.508056	3.20912	0.127241	0.79901
ERCC2	0.319033	0.319154	6.31946	0.12728	0.79901
MITF	-0.718018	-0.722809	2.16423	0.127327	0.79901
STK38	0.331309	0.331511	5.80177	0.127329	0.79901
PSTK	0.731038	0.736734	2.3991	0.127455	0.799373
NUP54	-0.359298	-0.359813	4.94327	0.127611	0.79959
TRMT61A	0.417818	0.418795	4.12528	0.127626	0.79959
WDR3	0.322859	0.323022	5.7859	0.128006	0.801532
HLCS	0.321201	0.321351	5.74049	0.128073	0.801532
PIK3C3	0.321226	0.321369	5.94566	0.128304	0.801616
REXO1	0.327247	0.32744	5.61619	0.128349	0.801616
RSBN1	-0.374921	-0.375385	4.57709	0.128423	0.801616
C14orf119	-0.322803	-0.322971	5.94669	0.128451	0.801616
ZNF12	0.35475	0.355117	4.82945	0.128476	0.801616
GMDS	0.364442	0.36494	4.33747	0.128497	0.801616
LEPROT	-0.302688	-0.302749	7.47922	0.128582	0.801725
AUNIP	-1.30903	-1.36963	1.16512	0.128717	0.801973
HOXB-AS3	0.706858	0.713023	2.55162	0.128819	0.801973
GREM2	-1.32033	-1.381	1.05845	0.128944	0.801973
C8orf76	-0.763712	-0.770412	1.93194	0.128944	0.801973
JOSD2	0.354036	0.354312	5.03129	0.12897	0.801973
ADAMTS5	0.627585	0.631754	2.60193	0.129112	0.801973
TTC13	-0.385833	-0.386459	4.19581	0.12922	0.801973
TMEM102	0.912338	0.925276	1.67708	0.129253	0.801973
TRAF5	0.403895	0.404742	3.95884	0.129401	0.801973
MINDY2	0.312439	0.31253	6.62058	0.129485	0.801973
NEDD1	-0.33563	-0.335965	5.38037	0.129539	0.801973
ROBO3	0.409166	0.40983	3.85043	0.129576	0.801973
TMEM164	-0.388477	-0.38909	4.43486	0.129652	0.801973
MED10	-0.34075	-0.341037	5.13562	0.129663	0.801973
SEL1L	-0.295155	-0.295177	8.29949	0.12971	0.801973
RNF114	-0.320739	-0.3209	5.94675	0.129717	0.801973
MUL1	0.350152	0.350528	4.84451	0.129827	0.802231
SREBF2-AS1	0.985745	1.00272	1.16228	0.129948	0.802555
SERPINE3	-0.838882	-0.8486	1.60114	0.130055	0.802791
NCKAP5	0.394765	0.395598	4.6199	0.130294	0.803628
STC1	-0.29692	-0.296949	8.50735	0.130327	0.803628
HDAC4	0.407279	0.408055	4.06687	0.130408	0.803705
PATL1	-0.315128	-0.315242	6.2132	0.130647	0.804754
CBX8	0.557123	0.558744	3.24888	0.130923	0.805626
MED18	0.393791	0.394497	3.99968	0.131027	0.805626
LSR	-1.1362	-1.17308	1.49019	0.131055	0.805626
ATAD2B	-0.474247	-0.475831	3.32537	0.131069	0.805626
ANKRD36	0.547727	0.550236	3.24618	0.131132	0.805626
GALNS	-0.340815	-0.341105	5.05444	0.131251	0.805929
ZSWIM7	0.584987	0.587429	2.89404	0.131442	0.806683
DUSP5	-0.299821	-0.299872	7.51256	0.131689	0.807462
RPL26P6	-0.616995	-0.619467	2.20872	0.131707	0.807462
LRIG1	0.343597	0.344018	5.23436	0.131951	0.808214
IL11RA	0.368059	0.3685	4.33268	0.132059	0.808214
AQP11	-0.8894	-0.901815	1.23832	0.132062	0.808214
RNPC3	0.419357	0.420317	3.66426	0.132105	0.808214
COL21A1	-0.850496	-0.858915	1.17037	0.132358	0.80886
E2F3	-0.339399	-0.339741	5.17377	0.132389	0.80886
WFS1	-0.314858	-0.314995	5.97569	0.132418	0.80886
FAHD2B	0.760638	0.766951	1.47737	0.132521	0.808864
TTI2	-0.488842	-0.490404	3.41169	0.132557	0.808864
BTBD10	-0.3266	-0.326802	5.56699	0.132771	0.80975
ABHD14B	0.332903	0.333139	5.3351	0.132924	0.809877
LIMD2	0.525874	0.527754	3.27125	0.13293	0.809877
CCDC115	-0.386528	-0.387039	4.51612	0.133235	0.811316
NCOA7	-0.323552	-0.323708	5.68547	0.133475	0.811901
EPHA5-AS1	0.879117	0.889199	1.49127	0.133514	0.811901
MAGEE1	0.535855	0.538454	3.1708	0.133539	0.811901
EPHA5	0.308502	0.308567	6.59331	0.134009	0.81422
MCTS1	0.346486	0.346893	4.95442	0.134059	0.81422
MYO10	0.315163	0.315306	6.32891	0.134302	0.815271
ACAP3	0.312466	0.312593	6.30498	0.134391	0.815391
ZNF512B	0.326353	0.32655	5.65219	0.134707	0.815631
PHF11	-0.365738	-0.366217	4.57152	0.134715	0.815631
ZNF234	0.457609	0.458867	3.44914	0.134833	0.815631
STAC	-0.359562	-0.359921	4.54265	0.134855	0.815631
UBAC2	-0.318321	-0.318461	5.76892	0.134879	0.815631
CHMP4C	0.539015	0.540758	3.04273	0.134884	0.815631
PRPF40B	0.418382	0.419312	3.5368	0.134976	0.815631
C2orf42	-0.427571	-0.428661	3.5262	0.134988	0.815631
BFAR	-0.323399	-0.323602	5.80783	0.135223	0.816426
C1orf52	-0.3571	-0.357516	4.45421	0.135295	0.816426
CEP97	-0.356988	-0.357425	4.90701	0.135328	0.816426
PCYOX1L	-0.534074	-0.536012	2.83934	0.135503	0.816937
LINC01128	-0.500503	-0.502331	3.24211	0.135552	0.816937
COX20	0.885189	0.898488	1.44238	0.13597	0.819035
TEP1	0.31314	0.313246	6.21807	0.136078	0.819265
ABLIM1	0.607349	0.610117	2.46527	0.136205	0.819607
UVSSA	0.362761	0.363284	4.35225	0.136595	0.821061
C1S	-0.54309	-0.544184	3.22586	0.136622	0.821061
NDUFB1	-0.353075	-0.353456	4.8221	0.136657	0.821061
GPX1P1	0.328833	0.329069	5.51991	0.136867	0.821678
SCAPER	-0.378942	-0.379505	4.1799	0.136949	0.821678
MRPS17	0.78968	0.798114	1.85884	0.13697	0.821678
DUSP3	-0.304623	-0.304698	6.80782	0.137067	0.821727
TMEM268	0.387368	0.387991	3.91477	0.137118	0.821727
ANKRD36B	0.877048	0.890307	1.51458	0.137312	0.822242
RUVBL2	0.312531	0.31265	6.58028	0.137465	0.822242
CYB5D1	-0.677818	-0.682127	2.58149	0.137478	0.822242
H2AFJ	0.323252	0.323458	5.4551	0.137485	0.822242
THSD1	-0.725377	-0.730279	1.75162	0.137741	0.822543
MEF2C	-0.353682	-0.354093	4.44696	0.137789	0.822543
C1orf43	-0.298903	-0.298948	7.57014	0.137927	0.822543
PET117	0.958471	0.975278	1.14682	0.13793	0.822543
KNOP1	0.46283	0.464187	3.48325	0.137969	0.822543
MFAP2	-0.340161	-0.34047	4.78845	0.137999	0.822543
SLC30A1	-0.32776	-0.32799	5.34435	0.138026	0.822543
S100A13	0.332147	0.33236	5.1889	0.138122	0.822696
SLF1	-0.469634	-0.471129	3.95408	0.138321	0.822747
NPHP3	0.308753	0.308866	6.15	0.13834	0.822747
PQBP1	0.376637	0.377328	4.48049	0.138502	0.822747
CTSO	-0.343538	-0.343811	4.76628	0.138564	0.822747
ZNF841	-0.358911	-0.359404	4.23159	0.138604	0.822747
SGF29	0.654548	0.659147	2.30787	0.138651	0.822747
XPA	0.423693	0.424905	3.6459	0.138652	0.822747
FBXO36	-0.627154	-0.631008	2.41978	0.138692	0.822747
SCNM1	0.364393	0.36493	4.38993	0.138781	0.822856
TMEM121	0.684308	0.689343	2.37404	0.138924	0.822888
ERO1A	-0.296801	-0.296853	7.47463	0.138926	0.822888
RBFA	0.440247	0.441761	3.69693	0.139045	0.823131
TAF1	0.325935	0.326145	5.53897	0.139108	0.823131
VPS52	0.388793	0.389572	4.2725	0.139319	0.823647
ING4	0.454398	0.455793	3.41262	0.139336	0.823647
C21orf91	-0.324354	-0.324489	5.39622	0.139444	0.823741
FUBP3	-0.309385	-0.309492	6.4221	0.139492	0.823741
LINC01098	0.481371	0.482746	3.0142	0.139867	0.825278
SRPX2	-0.304412	-0.304503	6.68692	0.139912	0.825278
LINC00511	0.664051	0.667529	1.92808	0.139964	0.825278
C11orf91	1.45415	1.54015	0.864528	0.140114	0.825456
MINDY1	0.379199	0.379822	4.12535	0.140135	0.825456
RFX7	-0.321095	-0.321328	5.38259	0.140372	0.825947
SOD3	0.357312	0.357633	4.38158	0.140381	0.825947
GULP1	-0.341481	-0.341868	5.05868	0.140465	0.825947
CDCA4	-0.3966	-0.397624	5.04857	0.1405	0.825947
MRPS35	0.31916	0.319355	5.699	0.140767	0.826283
NEK3	0.422908	0.423918	3.66577	0.140787	0.826283
NALCN	0.955325	0.973261	1.85964	0.140818	0.826283
CCHCR1	0.43658	0.43753	4.0148	0.140839	0.826283
RASAL2-AS1	0.957217	0.972989	0.98171	0.141231	0.828166
[truncated: 9,723 more rows]

## Sheet: ARID1A_KO_clone2_vs_WT_NonKRAS
Name	logFC	unshrunk.logFC	logCPM	PValue	FDR
ALDH1A1	3.79221	3.79393	7.30556	9.82676e-36	1.15189e-31
SULF1	2.3911	2.39204	6.52976	6.0605e-25	3.55206e-21
NRK	-10.9949	-1.44269e+08	4.13782	1.81893e-24	7.10715e-21
GREM1	-1.20907	-1.20909	10.6296	7.82148e-23	2.29208e-19
PLAT	1.18722	1.18726	10.6172	1.21739e-22	2.85404e-19
SERPING1	2.03177	2.03287	6.68525	2.77182e-22	5.41521e-19
HHIP	1.6195	1.61974	7.05648	1.52651e-21	2.55625e-18
SERPINB2	1.61711	1.61747	7.49081	5.50508e-21	8.06631e-18
RSPO4	-5.78381	-5.85611	5.31645	1.18508e-20	1.54351e-17
CCL2	-3.10872	-3.11402	5.18133	9.72261e-19	1.13968e-15
GFPT2	-3.26208	-3.27051	4.52665	1.61311e-18	1.71899e-15
IGFBP5	3.24561	3.25345	4.78132	2.86168e-18	2.79538e-15
NES	2.01036	2.01149	5.54924	1.48842e-17	1.34209e-14
GABBR2	1.98856	1.98962	5.43802	3.32438e-17	2.78346e-14
MMP2	-1.07857	-1.0787	8.04823	7.27154e-17	5.68246e-14
UACA	-1.18596	-1.18613	7.50988	8.20102e-17	6.00827e-14
FST	-5.25963	-5.31573	3.41235	1.26097e-16	8.69474e-14
PAGE1	2.90033	2.90691	4.84984	2.44145e-16	1.58993e-13
TERT	0.968331	0.968355	10.0668	4.00093e-16	2.46836e-13
LAMB1	-1.05381	-1.05396	8.12747	8.24789e-16	4.83409e-13
SEMA3C	-1.27222	-1.27257	7.1657	2.32688e-15	1.29884e-12
INHBA	-0.929624	-0.929667	8.94804	4.23203e-15	2.2549e-12
NRCAM	1.87355	1.87646	6.34733	7.58873e-15	3.86762e-12
PLXNA2	1.8222	1.82331	5.46895	1.43159e-14	6.99211e-12
LUM	-2.34655	-2.35059	5.95346	1.64722e-14	7.47439e-12
APCDD1L	-3.89622	-3.91372	3.61254	1.65786e-14	7.47439e-12
NPTX1	0.863821	0.863845	9.18224	2.63692e-14	1.14482e-11
PRSS23	-0.980414	-0.980538	7.53852	2.99582e-14	1.25418e-11
ANKRD1	1.13218	1.1324	6.60733	5.52152e-14	2.23184e-11
MAGEA3	-4.82657	-4.88895	3.4487	6.89611e-14	2.69454e-11
IL11	-2.07251	-2.07614	5.51506	7.37002e-14	2.78682e-11
BMP6	2.28733	2.28985	4.41767	7.76228e-14	2.84342e-11
ABCC3	-2.3033	-2.30891	4.81751	9.09847e-14	3.23189e-11
COL3A1	-0.879903	-0.879944	9.48774	9.89295e-14	3.41074e-11
PAPPA	-0.915455	-0.915524	8.46636	1.028e-13	3.44293e-11
PLOD2	-0.816472	-0.816507	9.51476	1.26663e-13	4.1243e-11
G0S2	2.82927	2.83605	3.80462	2.04789e-13	6.48795e-11
IGFBP6	1.25853	1.25891	6.60772	2.48649e-13	7.67017e-11
FRMD3	1.2477	1.24827	6.62558	2.56344e-13	7.70477e-11
FAM133A	-3.24824	-3.26342	3.83931	1.07083e-12	3.13808e-10
CLU	-5.95924	-6.40338	6.01679	4.58532e-12	1.2993e-09
IL7R	-2.23948	-2.2427	4.08009	4.65539e-12	1.2993e-09
COL12A1	-0.850982	-0.851043	8.52989	5.34309e-12	1.4379e-09
SAA1	-4.72218	-4.80454	2.85068	5.39735e-12	1.4379e-09
ATM	-1.01977	-1.02005	7.73237	1.28548e-11	3.34854e-09
PAGE3	-8.37189	-1.44269e+08	2.13553	1.44794e-11	3.68974e-09
IGFBP4	-0.742493	-0.742507	10.848	1.96759e-11	4.90725e-09
ABCA1	-1.74078	-1.74304	4.96626	3.09538e-11	7.55917e-09
NID2	-0.714667	-0.714716	9.54539	6.12381e-11	1.46497e-08
RTN1	2.16722	2.17149	4.21537	6.3253e-11	1.4829e-08
TNC	-2.64082	-2.66528	6.198	2.00253e-10	4.60269e-08
LAMB3	1.27392	1.27445	5.76834	2.30914e-10	5.20533e-08
SORT1	1.22499	1.22562	5.72365	3.88992e-10	8.60334e-08
F3	-1.3232	-1.32394	5.39573	4.65878e-10	1.0113e-07
ANTXR2	-0.843052	-0.843305	7.992	5.09292e-10	1.08544e-07
SYNE1	-0.812835	-0.812998	7.74339	5.27073e-10	1.10328e-07
QPRT	-2.88467	-2.9053	3.20843	7.92777e-10	1.63034e-07
CD4	-2.05033	-2.05658	4.51838	8.36883e-10	1.69137e-07
MYLK	-1.22386	-1.22469	5.33052	1.00637e-09	1.97325e-07
NAA16	0.65602	0.65604	10.1553	1.01002e-09	1.97325e-07
LMO4	-0.971081	-0.971531	6.54662	1.80967e-09	3.47753e-07
COL4A1	-0.694066	-0.694116	8.76749	1.87032e-09	3.53612e-07
IRS2	0.953009	0.953359	6.56496	2.09119e-09	3.89094e-07
ST3GAL5	-2.80481	-2.83286	3.71698	2.18211e-09	3.99666e-07
SLC2A13	-1.14214	-1.14338	7.07664	3.17824e-09	5.7316e-07
SFRP1	0.809889	0.810014	6.75086	4.28682e-09	7.61365e-07
ID1	1.07287	1.07342	5.63102	4.63885e-09	8.11592e-07
ITGA10	1.29028	1.29105	5.0695	4.77157e-09	8.22534e-07
ZNF185	-2.407	-2.41742	3.62147	5.74008e-09	9.75147e-07
LOX	0.759812	0.759911	7.88814	6.07245e-09	1.01688e-06
FEZ1	-2.77294	-2.79533	4.24771	7.97139e-09	1.31607e-06
SERTAD4	-4.98273	-5.14399	1.28663	9.71999e-09	1.58247e-06
SEL1L3	-1.89664	-1.90501	5.10133	1.02673e-08	1.62812e-06
HSPA5	-0.619725	-0.619737	10.3831	1.02782e-08	1.62812e-06
VSIR	1.44193	1.44476	5.3205	1.1597e-08	1.81253e-06
SUSD5	3.07987	3.11055	2.79189	1.18895e-08	1.83379e-06
SYNPO	-0.984757	-0.985151	6.05924	1.2251e-08	1.86502e-06
EREG	-0.877418	-0.877794	8.171	1.36285e-08	2.04812e-06
EMP1	0.646645	0.646675	8.95867	1.73442e-08	2.57352e-06
PLCB4	-1.2914	-1.29284	4.77888	2.37639e-08	3.482e-06
PROS1	-1.22809	-1.22984	5.61342	2.85861e-08	4.13687e-06
CBS	2.44285	2.46461	5.24161	3.11192e-08	4.44853e-06
SIX1	1.65369	1.65654	3.91479	4.54141e-08	6.41378e-06
DHRS3	4.33528	4.47334	2.54949	4.6617e-08	6.43095e-06
OFCC1	7.37921	1.44269e+08	1.88528	4.66329e-08	6.43095e-06
ENPEP	-1.19305	-1.19466	5.2245	5.59301e-08	7.6234e-06
OAF	-2.38071	-2.40302	4.42057	6.99331e-08	9.42248e-06
PRRX2	1.97202	1.97688	3.19905	7.39259e-08	9.84727e-06
C1QTNF1	-1.04502	-1.04612	5.88762	8.55327e-08	1.11561e-05
NRXN3	-2.23357	-2.25238	4.36597	8.56555e-08	1.11561e-05
SMAD3	0.835859	0.836136	6.24263	9.20297e-08	1.18546e-05
ESM1	1.06126	1.0622	5.70793	1.046e-07	1.33018e-05
AMIGO2	-1.13712	-1.13801	5.14414	1.05534e-07	1.33018e-05
PDGFRB	-0.60297	-0.603021	8.59567	1.58581e-07	1.97754e-05
GPX3	-1.59506	-1.59977	4.29565	1.61836e-07	1.99688e-05
IGFBP3	2.64564	2.6573	2.60426	1.70854e-07	2.06811e-05
ERRFI1	0.824238	0.824574	6.99205	1.71137e-07	2.06811e-05
MN1	1.1664	1.1673	4.56198	1.76817e-07	2.11495e-05
SCN8A	-1.36479	-1.36702	4.69228	1.91087e-07	2.26255e-05
CRISP3	3.53258	3.6655	6.44698	1.94648e-07	2.27296e-05
YOD1	3.95253	4.03565	2.24054	1.95844e-07	2.27296e-05
FAM171A1	1.21568	1.21681	4.96626	2.029e-07	2.33176e-05
SLC7A11	-0.691743	-0.691883	7.28407	2.26159e-07	2.57382e-05
ITGA11	-0.617528	-0.617578	8.47342	2.36362e-07	2.66407e-05
OLAH	-1.23629	-1.23864	5.29806	2.42341e-07	2.70545e-05
FIBCD1	-2.18765	-2.2001	3.41794	2.66224e-07	2.94404e-05
DNAJB9	-0.998663	-0.999546	5.6233	2.72733e-07	2.98783e-05
SLC20A1	0.596733	0.596779	8.5258	2.9552e-07	3.18928e-05
CPE	-1.9144	-1.92688	4.32076	2.96563e-07	3.18928e-05
ITGA3	-0.611621	-0.611654	9.30394	3.37429e-07	3.59576e-05
CSPG4	-0.69854	-0.698654	6.89131	3.52209e-07	3.71945e-05
SYNPO2	-1.02991	-1.03118	6.59675	3.7275e-07	3.90123e-05
DYSF	-3.37711	-3.46964	3.65917	5.44837e-07	5.65184e-05
HMGB3	0.972407	0.972852	5.32837	5.57416e-07	5.7316e-05
C1orf115	-3.48301	-3.55026	2.45761	6.00894e-07	6.12493e-05
MYPN	0.812717	0.813019	5.80655	7.57001e-07	7.64963e-05
ID3	0.779744	0.779984	6.54579	8.70985e-07	8.72622e-05
PTGER2	0.959268	0.960034	5.3157	9.07874e-07	9.01873e-05
SEMA6D	0.813552	0.813835	6.10299	9.55744e-07	9.41448e-05
TFAP2A	5.06555	5.45237	1.73888	1.00331e-06	9.80067e-05
APCDD1L-DT	-3.68056	-3.74027	1.61307	1.03252e-06	0.000100026
PSD3	-0.92994	-0.93081	6.39002	1.05311e-06	0.000101185
PDIA4	-0.582346	-0.582394	8.06185	1.09815e-06	0.000104655
ATXN1	-1.32735	-1.33095	4.79575	1.18491e-06	0.000112013
COL7A1	-0.866906	-0.86724	6.75825	1.30253e-06	0.000122146
DUSP5	0.634778	0.634884	7.51256	1.33088e-06	0.000123814
CPA4	-2.66656	-2.68185	2.17659	1.37883e-06	0.000127265
MBNL2	-0.892646	-0.893017	6.31328	1.39415e-06	0.000127674
SEMA4B	-1.35635	-1.36053	4.70429	1.42669e-06	0.000129641
IRAK3	2.03816	2.04657	3.5471	1.4753e-06	0.000133027
BCL6	1.12946	1.13115	4.80322	1.96512e-06	0.000175841
PHLDB2	-2.17515	-2.18879	2.78044	1.99195e-06	0.000176892
MGA	-1.27691	-1.27949	4.35238	2.0443e-06	0.000180175
KCNJ6	1.49688	1.50017	3.76166	2.16918e-06	0.000189377
CNN1	2.22176	2.23663	2.93163	2.18102e-06	0.000189377
C16orf45	-1.30968	-1.31218	4.25085	2.37223e-06	0.000204465
PMEPA1	1.05398	1.05497	4.90988	2.57668e-06	0.000220466
PPP1R14A	1.97467	1.98361	3.87211	2.59635e-06	0.000220539
RAPGEF3	1.42893	1.43348	4.93291	2.7086e-06	0.000228419
FTL	-0.528453	-0.528467	10.4229	3.11247e-06	0.000260602
MAGEC2	-0.970295	-0.971116	4.97267	3.36094e-06	0.000279411
MAPK10	-2.42897	-2.44841	3.14373	3.45068e-06	0.000284851
DMBT1	-1.45187	-1.45687	3.98349	3.55927e-06	0.000291761
COL6A1	-0.570643	-0.57066	9.62559	3.70715e-06	0.000301772
HYOU1	-0.600031	-0.600112	7.82528	4.12949e-06	0.000331678
KREMEN1	1.59297	1.59852	3.64977	4.13112e-06	0.000331678
PXDN	-0.526171	-0.526188	9.64463	4.25435e-06	0.000339248
SCARA3	-3.73269	-3.82729	1.15644	4.35024e-06	0.000344551
CCBE1	0.647411	0.647555	6.74936	4.51262e-06	0.000355013
GYPC	-0.96323	-0.964143	5.3214	4.62633e-06	0.000361532
SCUBE3	0.768237	0.768465	6.06317	4.73581e-06	0.000367637
LY6K	1.43984	1.44224	3.47245	4.83639e-06	0.000372975
RNF157	3.08129	3.13778	2.08153	4.878e-06	0.000373725
MYRF	-2.06749	-2.08352	3.0498	4.912e-06	0.000373886
FHL1	-1.39817	-1.4019	4.07339	5.15309e-06	0.000389707
ZNF711	4.20148	4.40292	1.6961	5.21941e-06	0.000392192
LSS	-0.608283	-0.60837	7.26761	5.47419e-06	0.000408716
CAV1	0.510299	0.51031	9.94175	5.71778e-06	0.000424201
SSC5D	-1.12009	-1.12174	4.65856	6.18949e-06	0.000456309
LXN	1.29515	1.29776	3.90446	6.2877e-06	0.000460653
IKZF2	1.63228	1.63811	3.47098	6.55135e-06	0.000474168
DUSP1	0.564618	0.564685	7.75698	6.55308e-06	0.000474168
DENND2A	-2.77031	-2.8001	1.79129	6.78986e-06	0.000488287
PRKAA2	-1.21799	-1.22058	4.36389	7.22501e-06	0.000516412
FOXL1	0.697812	0.698011	6.10235	7.83681e-06	0.000556746
SLC5A12	6.4704	1.44269e+08	1.60748	7.92441e-06	0.000559578
EVL	4.17681	4.37807	1.3606	8.05934e-06	0.000565698
COL5A1	-0.586762	-0.586808	8.56642	8.21217e-06	0.000572995
EDNRB	2.88562	2.93421	2.51551	8.30979e-06	0.000576375
NCOA7	-0.882144	-0.882875	5.68547	8.57842e-06	0.000591507
PDGFC	-0.683521	-0.68376	6.29361	1.04153e-05	0.000713964
AGRN	-0.515085	-0.515106	10.1591	1.12939e-05	0.000769693
EFHD1	1.3668	1.37124	4.08963	1.13877e-05	0.000771597
CKB	2.72424	2.75626	2.03251	1.23495e-05	0.00083196
S1PR1	0.855297	0.856149	6.78666	1.26019e-05	0.000844109
TRIP11	-0.645245	-0.645396	6.87862	1.29521e-05	0.000858977
TNFRSF19	-1.27738	-1.27978	4.177	1.29704e-05	0.000858977
CDH10	-2.75583	-2.80023	2.36843	1.30992e-05	0.000862635
ZNF469	1.52732	1.53104	3.12	1.44308e-05	0.000945014
SLC7A2	0.579655	0.579714	7.71352	1.46871e-05	0.000956456
TRIM58	-0.696017	-0.696227	6.89496	1.48776e-05	0.000963513
SLC38A1	-0.560536	-0.560646	7.93297	1.53504e-05	0.00098867
CDA	-1.62306	-1.6291	3.08489	1.65294e-05	0.00105878
KCNAB2	-2.0974	-2.11658	3.17931	1.75509e-05	0.00111811
SLC9A3R2	-0.630588	-0.630658	8.1032	1.82223e-05	0.00115461
RNU6-1	0.836214	0.836915	5.82608	1.85214e-05	0.00116725
MEOX2	2.33693	2.35208	1.94053	1.94429e-05	0.00121877
SSTR1	0.919654	0.921684	7.03386	2.04931e-05	0.00127777
LINC02506	4.54535	4.92754	1.74613	2.26284e-05	0.00140344
HAS2	0.679492	0.679682	6.11391	2.47244e-05	0.00152537
EGR1	0.674918	0.675286	7.17495	2.71927e-05	0.00166886
TNNT1	-3.65288	-3.80652	1.756	2.79967e-05	0.00170926
NEDD9	0.782123	0.782465	5.45353	2.82396e-05	0.00171515
LYPD1	-1.02749	-1.0284	4.15294	2.87868e-05	0.00173393
FOXF1	-1.92524	-1.93601	3.04603	2.88447e-05	0.00173393
TBC1D4	0.609053	0.609213	6.71362	3.10866e-05	0.00185917
ABCA5	-1.05624	-1.058	4.57062	3.13485e-05	0.00186532
KIAA1324L	-3.61231	-3.76559	1.57733	3.21369e-05	0.00190257
TTLL7	-0.735136	-0.735485	5.78024	3.23182e-05	0.00190369
TAGLN	0.55162	0.551702	7.65144	3.27414e-05	0.00191898
PTPRS	0.951516	0.953091	5.10751	3.3856e-05	0.00197443
PTGS1	-0.589797	-0.589905	6.9569	3.40406e-05	0.00197536
C3orf14	-3.66207	-3.77887	0.990221	3.42337e-05	0.00197679
PIK3CD	-0.647009	-0.647226	6.41343	3.4912e-05	0.00200607
GFPT1	-0.527635	-0.527709	8.42147	3.75649e-05	0.00214798
ITGA1	-0.617323	-0.617524	7.13862	3.83502e-05	0.00218224
ARMCX3	-0.587717	-0.587846	7.24215	3.8864e-05	0.00220079
COL4A2	-0.493027	-0.493044	9.82087	3.95513e-05	0.00222894
GALNT15	1.10121	1.10438	6.16529	4.09441e-05	0.00229639
MAPRE3	1.55419	1.56103	3.97395	4.13175e-05	0.00230631
PDE10A	1.47245	1.47749	3.21158	4.38167e-05	0.00243422
EDN1	-1.05589	-1.05721	4.09651	4.50947e-05	0.0024934
SERTAD2	0.614507	0.614696	7.03168	4.8101e-05	0.00264714
CAMK2N1	0.682233	0.682465	5.87056	4.83565e-05	0.00264876
TMEM246	1.10847	1.11092	4.39094	4.97461e-05	0.00270666
LOXL3	-0.623322	-0.623487	6.98412	4.98754e-05	0.00270666
LTBP1	0.480767	0.480789	9.08746	5.14226e-05	0.00277777
LRRC15	-2.4546	-2.49014	1.9381	5.93047e-05	0.00318885
ANXA1	0.478323	0.478335	9.81431	5.97436e-05	0.00319779
HIF3A	-6.27019	-1.44269e+08	0.941328	6.03941e-05	0.00321791
NEGR1	-0.603763	-0.603931	6.78739	6.1282e-05	0.00325044
H1F0	0.575779	0.575957	7.42726	6.76231e-05	0.00356782
JMY	-1.13637	-1.14041	4.9363	6.78744e-05	0.00356782
TP73	2.2674	2.28735	1.61772	6.85198e-05	0.00358567
TGFBR2	0.505249	0.505278	8.73573	6.95315e-05	0.00362244
RALGPS2	-0.86315	-0.864907	6.93555	7.20825e-05	0.00373872
HSP90B1	-0.473095	-0.473105	10.3577	7.50402e-05	0.00387498
JAM3	-1.03183	-1.03352	4.14024	7.60402e-05	0.0039094
TRIB3	-0.852529	-0.854174	6.6805	7.64626e-05	0.00391395
SLC41A2	-1.29853	-1.30245	3.88185	7.71088e-05	0.00392987
CD55	-0.552324	-0.55252	8.33134	7.90163e-05	0.0040037
NFKBIZ	0.806606	0.807333	5.44161	7.92405e-05	0.0040037
EDIL3	-0.658598	-0.658812	6.48678	7.98708e-05	0.00401822
ID2	1.38502	1.38916	3.2147	8.47122e-05	0.00424357
CPM	0.843013	0.843706	5.31086	9.05703e-05	0.00451772
GCNT1	0.704553	0.704862	5.76748	9.70053e-05	0.0048182
CDH13	-0.810562	-0.811456	5.31121	9.78122e-05	0.00483778
CYB5R2	1.07098	1.07333	4.01366	0.000100465	0.00489222
AKR1C1	-3.06803	-3.15817	1.25324	0.000100641	0.00489222
SEC14L2	0.934134	0.935229	4.33731	0.000100764	0.00489222
MBP	-2.96905	-3.03338	1.54066	0.000100776	0.00489222
NQO1	-0.506381	-0.506429	7.68099	0.000101	0.00489222
GPAT3	-1.16648	-1.17015	3.99612	0.000114559	0.00552615
PRRX1	0.592929	0.593091	6.32045	0.000119004	0.00571709
CXCL5	-0.685684	-0.686044	7.15732	0.000125539	0.00598841
ARHGEF2	-0.538081	-0.538208	7.97702	0.000125674	0.00598841
MYO1E	0.586717	0.586876	6.84748	0.000132688	0.00629702
LAMA5	-2.03943	-2.07532	6.15852	0.000150127	0.00709594
CTIF	-0.555238	-0.555336	7.37509	0.00015456	0.0072744
AGTR1	0.75884	0.759373	5.41497	0.000155144	0.0072744
CD83	1.51975	1.52931	3.53935	0.000163228	0.00762295
SVEP1	-1.07767	-1.08034	4.24104	0.000165475	0.00766915
PAWR	-0.556696	-0.556845	6.82905	0.000165526	0.00766915
HERPUD1	-0.525158	-0.525258	7.65282	0.000166456	0.00768007
HPCAL1	-0.74997	-0.750709	5.41016	0.000167072	0.00768007
FADS2	-0.475793	-0.475824	8.83782	0.000171583	0.00785664
CRIP2	-1.66892	-1.67867	3.27757	0.000178357	0.00813502
THBS2	-0.717147	-0.717683	5.62798	0.000190042	0.00863439
LGR4	-0.780761	-0.781349	5.03981	0.000194484	0.00877078
UNC13B	-0.752077	-0.752741	5.13043	0.000194541	0.00877078
NRIP1	0.632072	0.632345	6.1065	0.000202242	0.00908306
GDF6	1.28246	1.28545	3.0617	0.000206432	0.0092186
ZNF277	-0.965676	-0.967704	4.27	0.000206833	0.0092186
PSAT1	-0.609692	-0.610084	7.56685	0.000207667	0.00922071
SULT1B1	2.70541	2.75968	1.09623	0.000213731	0.00945419
SERINC2	-0.763833	-0.764313	5.23449	0.000215106	0.00947922
TEX2	0.749071	0.749619	5.35634	0.000220446	0.00967814
TFR2	3.76844	3.96608	0.877535	0.000229588	0.0100332
FADS3	-0.499602	-0.499687	8.08148	0.000230791	0.0100332
PID1	-0.808956	-0.809812	4.97634	0.0002311	0.0100332
ATOH8	1.04941	1.05092	3.59718	0.000235461	0.0101674
SDC3	1.02409	1.02651	4.21492	0.000235927	0.0101674
LURAP1L	-1.0558	-1.05966	5.91338	0.000245964	0.0105611
ANKRD35	1.94348	1.9595	1.59793	0.000250885	0.0107331
IGF2	0.485158	0.485187	9.53214	0.000263143	0.0112166
SERTAD4-AS1	-3.21029	-3.32366	0.359166	0.000266552	0.0113207
SEMA3F	-2.0662	-2.10582	4.17085	0.00026754	0.0113217
OLFML3	-0.713966	-0.714379	5.18072	0.000276496	0.0116358
PLEKHA7	0.639081	0.639338	5.78654	0.000276948	0.0116358
TGFB2	-0.822116	-0.823863	6.63113	0.000283821	0.011882
ZFP36L1	0.481409	0.481461	8.27988	0.000286613	0.0119561
CMTM8	1.49732	1.50372	2.9784	0.000289434	0.012031
SLC6A9	-1.31958	-1.32888	4.72462	0.000296372	0.0122759
CGAS	1.0561	1.0585	3.74418	0.00030024	0.0123923
ANGPTL4	0.555016	0.555127	6.64912	0.000306276	0.0125716
COL5A2	-0.46389	-0.463918	9.08285	0.000306728	0.0125716
C16orf74	-1.27285	-1.27776	3.3397	0.000311536	0.0127241
HEXB	-0.492406	-0.492485	7.8115	0.000314183	0.0127877
ABLIM3	-0.494278	-0.494361	7.72058	0.000317858	0.0128925
HSPB6	-0.499678	-0.499748	7.45358	0.000332396	0.0134357
SLFN5	-0.488352	-0.488427	8.22331	0.000334989	0.013494
SLC16A14	1.23675	1.23933	3.69553	0.000339009	0.0136091
EFNA5	0.854143	0.855149	4.50315	0.000345082	0.0138057
INPP4B	-0.679775	-0.680319	5.64421	0.000364765	0.0145435
SUSD2	3.0519	3.14906	0.506392	0.000368282	0.0146339
SDC2	-0.889307	-0.890636	4.69416	0.000369546	0.0146345
MAN2A1	-0.494413	-0.494497	7.91648	0.000377528	0.0148833
GCC2	-0.598129	-0.598442	6.5104	0.000378861	0.0148833
SPTLC3	-1.3343	-1.33913	3.30171	0.000379636	0.0148833
LINC01085	0.678651	0.678968	5.34489	0.00038713	0.0151265
FAM171B	-0.613986	-0.6145	8.11336	0.000392788	0.0152965
MAN1A1	-0.608115	-0.608364	6.0225	0.000396171	0.0153772
NFIL3	0.563826	0.564002	6.57452	0.000432918	0.0167481
ATP6AP1	-0.548488	-0.548656	6.97692	0.000436342	0.016825
DEPTOR	2.63312	2.70791	2.64212	0.000438101	0.0168374
COL5A3	-3.00811	-3.15465	2.20166	0.000461287	0.0176706
S100A10	-0.524445	-0.524546	6.57339	0.000469884	0.0179413
FZD7	0.645735	0.646132	5.54751	0.000476241	0.0180829
PHLDA2	-0.583481	-0.583701	6.13997	0.000476679	0.0180829
IER3	-1.15249	-1.15608	3.42915	0.000489037	0.0184919
HMGCS1	-0.562338	-0.562489	6.1411	0.00050934	0.0191757
CEBPB	-0.534235	-0.534369	7.32864	0.000511744	0.0191757
C5orf30	0.83292	0.833565	4.65888	0.000512028	0.0191757
MFSD6	-0.776878	-0.777907	5.30844	0.000523398	0.0195391
GLT8D2	-0.933381	-0.935246	4.282	0.000526713	0.0195657
CAND2	1.17676	1.18075	3.6574	0.000527449	0.0195657
APOBEC3D	-2.38756	-2.44011	1.76217	0.000538148	0.0198996
ADAMTS1	-0.443795	-0.443832	8.93359	0.000542257	0.0199483
FKBP5	0.54447	0.544584	6.79424	0.00054287	0.0199483
SEMA3A	-1.46294	-1.47446	4.86689	0.000556973	0.0204026
PDE4D	-0.810765	-0.81205	5.21172	0.000572855	0.020919
PKP3	1.20169	1.20553	3.87969	0.000582153	0.0211925
COL16A1	-1.14494	-1.14805	3.62355	0.000585373	0.0212438
WNT5B	0.572603	0.572768	6.30648	0.000612172	0.0221478
ASNS	-0.599314	-0.599724	7.15796	0.000614584	0.0221666
PTK7	-0.573803	-0.574119	6.43838	0.000617279	0.0221693
NMRAL1	1.15361	1.15696	3.49016	0.000618441	0.0221693
DDIT4	-0.690326	-0.691011	5.69993	0.000640809	0.0229011
TYMS	0.684097	0.684444	5.15534	0.000647101	0.0230557
CDK6	-0.507842	-0.507914	7.45524	0.0006716	0.0238561
RASSF4	2.13267	2.16178	1.88348	0.000702295	0.0248624
CDCA7	0.96116	0.962482	3.73348	0.000704173	0.0248624
BCAR3	0.591978	0.592239	5.80243	0.000722118	0.0254194
FMN2	0.680388	0.680817	5.14115	0.000728638	0.0255548
SLC6A6	-0.534334	-0.534436	6.62498	0.000730324	0.0255548
B3GALT2	2.92371	3.10972	4.25262	0.000750359	0.0261777
POSTN	3.19222	3.3826	2.49902	0.000755396	0.0262752
GPR156	5.63796	1.44269e+08	0.795141	0.000766753	0.0265913
SPARC	-0.420112	-0.420124	10.2893	0.000769159	0.0265961
MTTP	-1.85681	-1.8987	7.33679	0.000777065	0.0267905
ADM	-0.482612	-0.482683	7.57256	0.000789729	0.0271472
ALPK1	-0.773012	-0.77435	5.01667	0.000794336	0.0272258
SOX9	-1.68173	-1.69155	1.91359	0.000798811	0.0272993
PCMTD1	-0.638102	-0.638636	5.71606	0.000801349	0.0273064
VEGFC	0.592746	0.593038	6.01923	0.000809636	0.0275088
ZNF137P	-2.85977	-2.94809	0.896472	0.000820356	0.0277925
FOXL2NB	3.15349	3.28284	1.41368	0.000828041	0.027972
STARD4	-0.485764	-0.485834	7.60658	0.00084954	0.0286158
LRRC40	-0.769288	-0.770044	4.79513	0.000856718	0.0287749
GOLGB1	-0.468562	-0.46864	7.90976	0.000896725	0.0300326
SNHG3	0.576021	0.57628	6.02241	0.000901033	0.0300909
PATJ	1.22258	1.22863	3.37128	0.000904811	0.0301313
VEGFA	-0.574077	-0.574402	6.4844	0.000933556	0.0308712
GPR68	-1.85064	-1.86967	1.82748	0.000936082	0.0308712
STARD5	-2.14537	-2.18567	1.79685	0.000938382	0.0308712
LINC00942	-2.19914	-2.23627	1.0597	0.000939236	0.0308712
RAI14	0.443838	0.443871	8.48489	0.0009402	0.0308712
SLC4A11	2.28818	2.37632	4.07436	0.000947691	0.0309958
QSOX1	-0.43716	-0.437177	10.0813	0.000949284	0.0309958
PLAU	-0.664522	-0.664956	4.97473	0.000957335	0.0311719
LAMC1	-0.416531	-0.416542	9.98507	0.000983756	0.0319434
SPRY4	0.498539	0.498633	7.04128	0.000994243	0.0321602
H2AFY2	-3.3177	-3.53776	1.00035	0.000996158	0.0321602
ASAP3	1.89981	1.92987	2.55792	0.000998661	0.0321602
ATP8B1	-0.526274	-0.52638	6.77274	0.00100306	0.0322132
AK5	0.608212	0.608491	5.59754	0.00103827	0.033253
CNTN1	-1.97939	-2.00242	1.75412	0.0010503	0.0335465
XBP1	-0.50124	-0.501357	7.6775	0.00106912	0.0340532
TRIM16L	-1.4892	-1.49982	2.6399	0.00107197	0.0340532
KLHL23	1.90692	1.92773	2.01592	0.00108406	0.0343443
MAP9	-0.612381	-0.61281	5.79514	0.00108751	0.0343607
SEL1L	-0.44861	-0.448669	8.29949	0.00110295	0.0347549
DAAM1	-1.38392	-1.39206	2.77418	0.0011202	0.0352036
INSC	0.723475	0.724094	4.82012	0.0011272	0.0353289
MX1	0.940904	0.944675	5.6697	0.00113714	0.0355455
MINAR1	-1.77866	-1.80052	2.12134	0.00117477	0.0366035
P4HTM	-0.658422	-0.659188	5.48202	0.00117751	0.0366035
EPHB4	0.837497	0.838579	4.63942	0.00118036	0.0366035
ORAI3	-0.833372	-0.83513	4.41363	0.00118448	0.0366344
NPR3	0.839024	0.840405	3.96302	0.00125086	0.0385857
THSD4	0.625599	0.626049	5.5678	0.00128209	0.0393772
FLRT2	-0.520553	-0.520698	7.53529	0.00128324	0.0393772
LNX1	2.62012	2.69483	1.1072	0.00135488	0.0414095
KCTD12	-0.689415	-0.69002	4.88802	0.00135653	0.0414095
ARRDC3	0.674314	0.675097	5.46399	0.00136787	0.0416472
GALNT3	-1.08979	-1.09242	3.79613	0.00137647	0.0418003
DDIT3	-0.84914	-0.851589	5.11959	0.00139304	0.0421943
LARP6	-0.51802	-0.518273	6.77924	0.00140077	0.0423192
SLC3A2	-0.49296	-0.493095	7.50701	0.00140584	0.042363
AMZ1	-2.2755	-2.35692	3.36577	0.00143467	0.0431211
TEK	0.651781	0.652175	5.12025	0.00144302	0.0432609
ATP7A	-0.692798	-0.693503	4.93263	0.00146589	0.0438345
SLC38A2	-0.449224	-0.449244	9.42291	0.00147949	0.0441288
SIPA1L3	0.505352	0.505537	6.86554	0.00149059	0.0442752
LRCH2	-0.731963	-0.733066	4.82275	0.00149196	0.0442752
PIKFYVE	-0.533266	-0.533459	6.66116	0.00150029	0.0444101
LYST	-0.974154	-0.976752	4.13698	0.00151388	0.0446995
NBEAL1	-0.611872	-0.612192	6.02697	0.00152029	0.044776
ZNF367	0.799944	0.80083	3.82475	0.00152476	0.044795
AIG1	-0.54185	-0.542096	6.1522	0.00152941	0.0448192
TPCN1	-0.565952	-0.566259	6.3535	0.00153772	0.0449505
SLAMF1	2.9385	3.06528	0.564289	0.00154663	0.0450985
HHIP-AS1	1.07355	1.07659	3.10194	0.00157738	0.0458809
P3H1	-0.478665	-0.478769	7.58501	0.00162521	0.0471551
SIRPA	-0.981468	-0.985362	4.1048	0.0016391	0.0474409
SMAD9	0.850362	0.851519	4.66945	0.00166252	0.0480003
DBH-AS1	-2.05752	-2.09365	1.79586	0.00170221	0.0490254
PTGES	1.8343	1.85942	2.6311	0.00171813	0.0493626
AFF3	0.567884	0.568121	6.00219	0.00176608	0.050616
NRP2	-0.606688	-0.607213	5.88888	0.00178288	0.050892
MARCKSL1	1.38933	1.39507	2.4858	0.00178439	0.050892
DOCK5	0.447611	0.447655	7.96327	0.00182148	0.0518239
MVB12B	2.00055	2.03443	1.38693	0.00186546	0.052868
E2F8	1.74576	1.76098	1.42451	0.0018672	0.052868
BEX1	-0.584763	-0.584957	5.86128	0.0018859	0.0532688
LTBP4	-0.528992	-0.529276	6.51488	0.00189128	0.0532923
TNFAIP2	-0.521323	-0.521503	6.56645	0.00191538	0.0538419
CSMD3	-0.824214	-0.826445	4.70639	0.00192601	0.0539847
MYOF	0.411881	0.411894	9.7388	0.00192967	0.0539847
PRICKLE3	-5.15038	-1.44269e+08	0.54532	0.00194407	0.0542581
PSMD6-AS2	-2.43308	-2.50304	1.36555	0.00196588	0.0547365
SLC28A3	1.49213	1.50301	2.27951	0.00200981	0.055827
OXTR	0.764917	0.765767	3.87309	0.00204111	0.0565624
BST1	1.21425	1.21967	2.94344	0.00205097	0.0567015
SH3RF3-AS1	-3.1564	-3.37388	1.13522	0.00206569	0.0569743
CDIP1	1.84113	1.86623	2.1656	0.00207894	0.0572051
REEP2	1.46359	1.47572	3.67489	0.00213231	0.0584167
VDR	-0.549532	-0.549839	6.46658	0.00213294	0.0584167
HTR1F	1.56105	1.57047	2.07243	0.00215026	0.0585586
C14orf132	-0.589094	-0.589406	5.29048	0.00215243	0.0585586
CYR61	0.409388	0.4094	9.90453	0.00215607	0.0585586
IL32	1.16296	1.17083	3.8622	0.0021581	0.0585586
IFI6	-0.67665	-0.678035	7.38733	0.0021826	0.0590865
POMGNT2	0.939071	0.941579	3.80201	0.0021932	0.0592365
RAB36	1.56392	1.579	2.45692	0.00220264	0.059272
EYA4	-0.973755	-0.97698	3.60518	0.00220462	0.059272
OGFRL1	-0.44649	-0.446578	7.86191	0.00222256	0.0596175
SLC30A7	-0.532745	-0.532965	6.50029	0.00223467	0.0598055
BICC1	-0.573089	-0.573414	5.61343	0.00224231	0.0598733
HMGN2	0.449364	0.449416	7.49985	0.00226566	0.0603591
RELN	0.926798	0.928883	3.95161	0.00227766	0.0605413
CHAC1	-0.918874	-0.923097	5.42052	0.00230565	0.0611466
FBN1	-0.396023	-0.396028	11.0649	0.00234976	0.0621758
KCNK2	0.538573	0.538867	6.20301	0.002383	0.0629134
LINC00622	-1.9006	-1.93009	1.54539	0.00239427	0.0630239
UGCG	-0.44235	-0.442404	8.18258	0.00239794	0.0630239
WDR91	-0.942993	-0.945534	3.44116	0.00245458	0.0642566
TUBB2B	2.08486	2.12796	1.37553	0.00245613	0.0642566
COL11A1	-1.30203	-1.31184	4.60681	0.00246129	0.0642566
KYNU	-4.88753	-1.44269e+08	1.4082	0.00250003	0.065123
SMPDL3A	-0.786521	-0.787909	4.13801	0.00250746	0.0651718
UPF3B	-0.813054	-0.814538	3.97626	0.00259765	0.0673665
TUFT1	-0.739324	-0.740795	4.93897	0.00260889	0.0675088
APMAP	-0.434272	-0.434348	7.95621	0.0027295	0.0704741
MCM10	0.786515	0.787388	3.86129	0.00276821	0.0711829
CTSO	-0.782006	-0.783732	4.76628	0.0027691	0.0711829
ANK3	-2.45762	-2.54152	0.956008	0.00278423	0.0714153
WDR76	0.652095	0.652543	4.55409	0.00281942	0.0721354
CTGF	0.406733	0.406751	9.12378	0.00282462	0.0721354
VASN	-0.428003	-0.428051	9.01689	0.00285712	0.0727026
USP53	-0.605125	-0.605746	5.59673	0.002861	0.0727026
NRP1	0.432511	0.432543	8.10862	0.00286543	0.0727026
LEPR	-0.600833	-0.601264	5.38431	0.00289192	0.0732161
FNDC3A	-0.482768	-0.482911	7.61963	0.00290267	0.0733299
PELI1	-1.19444	-1.20403	4.24675	0.00290964	0.0733479
LRRC37A	-2.35344	-2.42268	0.832832	0.00294286	0.0740261
MT1X	1.12455	1.12888	3.05403	0.00296429	0.0743286
FOXC2	0.563956	0.564196	5.46641	0.00296757	0.0743286
KIZ	-0.829595	-0.831584	4.59262	0.00299302	0.0748063
AJUBA	-0.456992	-0.45711	7.28267	0.00308694	0.0769896
LRRK2	-0.522984	-0.523274	7.01983	0.00309947	0.0770166
KIAA1549L	0.505328	0.505474	6.01793	0.00310547	0.0770166
HMGA1	0.39445	0.394457	10.1565	0.00310773	0.0770166
FMNL1	-3.50399	-3.91969	1.28156	0.00318969	0.0788808
RFX3	-1.31184	-1.3206	2.57407	0.00327963	0.0809343
GPRIN1	0.97625	0.978893	3.18033	0.00331265	0.0815775
GLIS1	-0.693708	-0.694591	4.53762	0.00333188	0.081879
C14orf28	-1.29283	-1.30229	2.73113	0.003375	0.0827653
TCF7L1	2.21435	2.25855	1.70145	0.00342771	0.0837046
HIST1H2BD	-2.78775	-2.93123	0.939421	0.00343641	0.0837046
ACADL	-3.48646	-3.90205	0.923902	0.00343644	0.0837046
SARDH	-0.750182	-0.751492	4.36999	0.00344187	0.0837046
HIST1H2AC	-1.33657	-1.34498	2.59515	0.00349341	0.0845281
DDX41	0.571253	0.571633	5.5477	0.00349437	0.0845281
TRANK1	-0.757917	-0.759759	5.08667	0.00349841	0.0845281
LAMA4	-1.67065	-1.68959	1.42644	0.00350458	0.0845281
DPF1	1.21798	1.22264	2.62606	0.00355048	0.0854593
LPIN3	0.709613	0.710697	4.39661	0.00356513	0.0854896
RORA	1.1873	1.1934	3.04268	0.00356881	0.0854896
LRP4	-0.890603	-0.892856	3.72912	0.00357761	0.0854896
MSS51	-1.27519	-1.29331	5.04553	0.00358091	0.0854896
EGFL7	-1.77699	-1.8078	2.65777	0.00359659	0.0855478
SPRY2	0.562475	0.562748	5.70412	0.00359794	0.0855478
GSTA4	-0.965488	-0.968593	3.34975	0.00369596	0.0875873
LNPEP	-0.51432	-0.514502	6.113	0.00369866	0.0875873
CXXC5	-0.60454	-0.605109	5.26645	0.0037321	0.088201
AR	-0.696548	-0.697409	4.61255	0.00377331	0.0889954
ZNF503	0.561038	0.561333	5.38046	0.00379645	0.0892625
ABHD4	-0.563666	-0.564055	5.69	0.00379986	0.0892625
ATP2B1	-0.462902	-0.463012	6.82552	0.00383498	0.0899072
SEC11C	-0.773494	-0.774843	3.98391	0.00384435	0.0899471
ZFPM2-AS1	-1.08214	-1.08768	3.32902	0.00385379	0.0899884
MT1E	0.425543	0.425592	7.33484	0.00392319	0.0914267
MYDGF	-0.441677	-0.441742	7.7728	0.00396493	0.092216
CA13	-0.882035	-0.884849	3.72036	0.00399973	0.0928313
RAB6B	1.44792	1.46234	2.78748	0.00400722	0.0928313
RBMS3	-0.568425	-0.568747	5.69804	0.00409469	0.0945796
CSGALNACT1	-0.443805	-0.443899	7.47587	0.00409883	0.0945796
DOCK4	-0.625773	-0.626784	5.8315	0.00412877	0.0950834
GANC	0.686528	0.687156	4.7753	0.00418806	0.0960749
MSMO1	-0.445235	-0.445293	7.37502	0.00418822	0.0960749
AKAP9	-0.441316	-0.441407	7.27677	0.00421968	0.0965412
ADARB1	0.521243	0.52148	5.8972	0.00422502	0.0965412
VNN1	1.16618	1.17284	3.45395	0.00425841	0.0971149
IGHV3-74	-2.25262	-2.31107	0.3812	0.00430451	0.0977279
MYO18A	0.980398	0.98308	3.52532	0.00430967	0.0977279
KLF5	0.741739	0.742956	4.21182	0.0043103	0.0977279
FGD4	0.47533	0.475454	6.33794	0.00435432	0.0983713
CCDC85A	1.27282	1.27751	2.62316	0.00435546	0.0983713
NINJ1	-0.732698	-0.734346	4.69096	0.00441257	0.0994696
CLTC	-0.395547	-0.395569	9.0636	0.00444149	0.0999293
NUCB2	-0.492976	-0.493141	6.68149	0.00445723	0.100091
GSAP	-0.811446	-0.813681	4.35117	0.00451813	0.101241
ZMYM1	-0.63597	-0.636729	4.72931	0.00452572	0.101241
COG6	-0.513899	-0.514219	6.20884	0.00456171	0.101852
ZSWIM4	-0.946261	-0.949711	3.67255	0.00458625	0.102205
ZNF813	1.61263	1.62724	2.07323	0.00462194	0.102805
CRELD1	-0.683264	-0.684509	4.80295	0.00466436	0.103503
HRH1	-1.43054	-1.44492	2.80658	0.00467095	0.103503
NAGS	0.747774	0.748931	4.30539	0.00473794	0.104709
NAT14	-0.672706	-0.673626	4.65651	0.00474324	0.104709
CALCR	1.09434	1.09723	3.11276	0.00477525	0.105217
MGAT5B	-1.69909	-1.72041	1.23166	0.00481258	0.105841
GPRC5A	0.800683	0.802284	4.26552	0.00483391	0.106111
EFS	2.39917	2.48898	1.19563	0.00485064	0.106279
ABCA13	0.898731	0.900108	3.41644	0.00487876	0.10667
MTURN	0.871838	0.873475	3.92284	0.0048867	0.10667
SLC7A5	-0.418436	-0.418525	8.73627	0.00502922	0.109577
MACROD2	-2.82745	-2.97116	0.714771	0.00507601	0.110392
VPS13A	-0.486176	-0.486307	6.90101	0.00509626	0.110627
DCAF17	0.61883	0.619371	5.16344	0.00517119	0.112046
FOXE1	0.795993	0.797863	4.01949	0.00518529	0.112144
PCDHB10	-2.32355	-2.40581	0.863345	0.00519854	0.112223
CTPS1	0.449528	0.44962	6.84448	0.00521992	0.112457
RCAN2	-1.54297	-1.55798	2.31722	0.00523768	0.112457
STK26	-0.632202	-0.633016	4.86516	0.0052415	0.112457
HELZ	-0.552924	-0.553269	5.79744	0.00525262	0.112457
EIF5A2	0.871004	0.872648	3.51654	0.00525733	0.112457
RNF25	0.682421	0.683404	4.46327	0.00527657	0.112663
TAF1A	-1.03491	-1.03906	3.0847	0.00533255	0.113651
LDHA	0.381965	0.381971	10.2083	0.00536011	0.114031
MITF	-1.57431	-1.59174	2.16423	0.00537318	0.114102
EIF2AK3	-0.633102	-0.633964	4.91438	0.00545887	0.115593
CLN6	0.673978	0.674682	4.35721	0.00546312	0.115593
C5AR2	1.05328	1.0575	3.27158	0.00556309	0.117496
TJP2	0.437097	0.437165	6.82881	0.00561621	0.118405
SH3PXD2B	0.722858	0.724468	5.04959	0.00567827	0.119072
KRT81	-2.2674	-2.34881	0.924759	0.00567989	0.119072
SGIP1	0.5903	0.590802	5.53848	0.00568233	0.119072
PARD3B	-0.622834	-0.62348	5.26466	0.00568849	0.119072
SPOCK3	-1.90613	-1.94432	0.625931	0.00569874	0.119074
TOM1L2	0.447406	0.447521	6.78589	0.00572562	0.119423
ITPR2	-0.512403	-0.512728	6.29551	0.00575605	0.119844
MAP3K6	0.564407	0.56479	5.45055	0.00583982	0.121373
PLXNB1	1.16921	1.17604	3.67518	0.00587271	0.121841
PTPRK	-0.471753	-0.471947	6.50679	0.00593698	0.122956
SGMS2	-0.475854	-0.476009	6.48426	0.00595721	0.123158
LYSMD3	-0.513424	-0.513687	6.07849	0.00597605	0.12333
SNHG20	1.94419	1.98595	1.53075	0.00624575	0.128669
SAPCD2	0.735508	0.736468	3.73447	0.00630445	0.12965
DRP2	-1.52336	-1.5377	1.37169	0.00634101	0.129953
TUBB3	0.8411	0.845058	4.55407	0.00634133	0.129953
C12orf75	0.411486	0.411527	7.6933	0.00637931	0.130344
PTPRN2	-2.1708	-2.22124	0.882089	0.00638267	0.130344
CLMP	-0.549489	-0.549844	5.47499	0.0064204	0.130887
CCDC81	2.04918	2.09192	1.13485	0.00647586	0.131628
KCNG1	0.732449	0.734513	5.16077	0.00647923	0.131628
COG3	-0.543705	-0.544155	5.53514	0.00660879	0.133864
ENC1	-0.563861	-0.56431	5.28031	0.00661214	0.133864
PANK3	-0.424881	-0.424961	7.37467	0.00663772	0.134018
HS6ST3	3.00324	3.19054	0.674254	0.00664261	0.134018
RNF207	0.731963	0.733457	4.06695	0.0066843	0.134628
LINC01537	-4.53065	-1.44269e+08	1.19618	0.00675419	0.135802
RPS6KA6	-1.07734	-1.08246	2.60482	0.00677223	0.135932
SIGIRR	1.04531	1.04937	3.19201	0.0068103	0.136462
IFI44L	-2.29224	-2.42618	4.19075	0.00695736	0.138997
FAM167A	-0.401893	-0.401935	7.8699	0.00696051	0.138997
AHDC1	-0.547319	-0.547831	5.45559	0.00700132	0.139574
RNF144B	0.654319	0.655078	4.50127	0.00709747	0.14125
MT1M	1.62645	1.64109	1.42478	0.00711979	0.141454
NAGPA	-0.855222	-0.857546	3.52584	0.00714282	0.141672
RAB3D	1.57095	1.58867	2.8956	0.00723773	0.143312
TMTC3	-0.480414	-0.480567	6.43709	0.00733075	0.144681
SERPINB7	0.546066	0.546401	5.04452	0.00733156	0.144681
LRP1B	-2.71911	-2.86144	1.17174	0.00743487	0.146473
PTPRJ	0.569667	0.569979	5.47984	0.00749354	0.147381
NOTCH3	-0.402406	-0.402445	8.70964	0.00755006	0.148244
PHYHD1	1.4373	1.44925	2.20965	0.00757456	0.148477
ATRNL1	0.709319	0.711067	5.41635	0.00762878	0.14929
CUL7	-0.530871	-0.531293	5.53355	0.00765447	0.149543
LPXN	1.07657	1.08216	2.62966	0.00767202	0.149636
ARLNC1	-2.82485	-3.03536	1.20056	0.0077756	0.151405
NNMT	-0.433268	-0.433343	7.80061	0.00779993	0.151627
TUBA4A	-1.24737	-1.25825	2.68471	0.00787848	0.1527
RGS12	0.647176	0.647928	4.43536	0.00788122	0.1527
OR2W3	-0.762525	-0.764471	4.09016	0.00798229	0.154403
ADGRG1	-1.97924	-2.05609	3.65329	0.0080071	0.15445
PDCD4	-0.513359	-0.513696	5.94181	0.00801105	0.15445
MMP11	1.89906	1.95384	2.53548	0.00805638	0.155069
CLTCL1	-0.593604	-0.594542	5.15644	0.00807534	0.155179
ZBTB38	-0.389853	-0.389884	8.44104	0.00809628	0.155327
MFHAS1	-0.835351	-0.838532	4.28923	0.00819019	0.156871
CLEC2D	-1.89124	-1.93359	1.29762	0.0082899	0.158522
SPATA13	0.667004	0.667891	4.10632	0.00833068	0.159043
GPAM	-0.654984	-0.6559	4.2342	0.00846068	0.161262
ZNF473	1.03511	1.03936	2.96513	0.0084971	0.161693
GALNT7	-0.497294	-0.49754	5.81086	0.0085279	0.162016
GGACT	1.60191	1.62725	1.64584	0.00861564	0.163418
MAP2	-1.01802	-1.02588	3.71712	0.0086524	0.163661
LRRC32	-0.766575	-0.769366	4.43767	0.00865638	0.163661
IQCN	-1.24223	-1.2535	2.76428	0.00869643	0.163928
AZIN2	-0.977108	-0.982765	3.3532	0.00869843	0.163928
VPS13B	-0.481084	-0.481281	6.30691	0.0087791	0.165182
ZNF117	-1.6069	-1.6276	1.76783	0.00898908	0.168862
ELP4	0.850131	0.852779	3.44441	0.00904214	0.169492
TGDS	-0.785788	-0.787877	3.65807	0.00905154	0.169492
LINC01322	1.0591	1.0649	2.92428	0.00912797	0.170651
DNAJC3	-0.420012	-0.420092	7.06841	0.00929035	0.172964
UTP23	-0.642185	-0.643068	4.54223	0.00930201	0.172964
EMC10	-0.588091	-0.588863	5.10549	0.00930239	0.172964
LRRN3	1.19277	1.20105	2.41412	0.00931071	0.172964
SPOCD1	-0.701276	-0.702227	4.49347	0.00934249	0.173279
GARS-DT	-0.837425	-0.839939	3.77467	0.00940489	0.173861
FBXL13	-1.36792	-1.38192	1.94334	0.00941509	0.173861
CREB3L1	-0.423275	-0.423362	7.05652	0.00944859	0.173861
SLC35F2	1.01761	1.02341	3.08959	0.00945588	0.173861
DNAJC25	-0.702009	-0.703386	4.15582	0.00945746	0.173861
HLA-B	-0.526172	-0.526872	8.10889	0.00946284	0.173861
ACP7	-2.27582	-2.37708	1.52159	0.00956872	0.175531
TMF1	-0.449638	-0.449791	6.75074	0.00962361	0.176161
TMEM99	1.444	1.45768	2.12902	0.00963312	0.176161
FOXC1	0.846103	0.848774	3.82452	0.00969051	0.176686
PCNX2	-0.560051	-0.560507	5.36686	0.00969194	0.176686
DDX60	-0.612192	-0.613278	5.31016	0.0097501	0.17747
WNT5A-AS1	-0.574181	-0.574658	4.83173	0.00984322	0.178748
CACHD1	-0.79964	-0.802012	4.24504	0.0098508	0.178748
PXN	0.401471	0.401516	7.91311	0.00992753	0.179862
BTN3A3	-0.611606	-0.6126	5.44246	0.0099581	0.180137
BIVM	-0.571849	-0.572395	5.09707	0.0100608	0.181715
HACD1	0.786426	0.788217	3.54401	0.0101372	0.182597
SYNM	0.641081	0.642514	5.51833	0.0101548	0.182597
KCNJ2	-0.910485	-0.914122	3.05661	0.0101564	0.182597
PKP2	-0.772197	-0.775364	5.68294	0.0101856	0.182764
PTPRF	-0.413967	-0.414061	7.34241	0.0101999	0.182764
RCAN1	-0.423386	-0.423487	6.93168	0.0102125	0.182764
TMEM132A	-0.548232	-0.548743	5.29195	0.0102615	0.183361
CFH	-0.418356	-0.418491	7.36182	0.0104373	0.185964
FHDC1	-2.21543	-2.29594	1.26173	0.0104389	0.185964
SMAD6	1.99178	2.03983	0.42188	0.0106164	0.188797
QRSL1	0.697953	0.699047	4.35815	0.0106333	0.188797
TMEM171	0.627663	0.628304	4.48818	0.0106462	0.188797
TMEM154	-0.607535	-0.608046	4.71759	0.0107528	0.190399
TTTY14	-1.48335	-1.50022	1.79003	0.0108328	0.191212
HHAT	-0.989339	-0.994033	3.08573	0.0108445	0.191212
C3orf18	0.799464	0.802251	4.14503	0.0108617	0.191212
TRMT6	0.544822	0.545319	4.99262	0.010864	0.191212
RXFP1	-1.92338	-1.978	1.34147	0.0109098	0.191731
JADE2	0.56578	0.566299	4.82076	0.0109523	0.19219
TRPS1	-0.635133	-0.63609	5.32134	0.0110074	0.192868
CYP2R1	-0.940737	-0.94522	3.49849	0.0110843	0.193926
PIAS3	0.444868	0.445013	6.45213	0.0113401	0.198106
MTHFD2	-0.428583	-0.428731	7.47366	0.01138	0.198506
ZFP36	0.512447	0.512808	5.44394	0.0114122	0.198773
CSRNP2	0.504383	0.504755	5.78255	0.0114517	0.199024
KIF21A	-0.590426	-0.591394	5.13334	0.0114709	0.199024
RARB	1.75585	1.79115	1.65331	0.0114776	0.199024
LMCD1	-0.438209	-0.438362	6.53357	0.0115178	0.199426
LINC01687	-1.29109	-1.30469	2.49969	0.0115885	0.200188
ST3GAL6	-0.76761	-0.770474	4.67205	0.0115978	0.200188
B4GAT1	-0.577037	-0.577869	4.91964	0.011613	0.200188
EFEMP1	-1.43278	-1.44722	2.20115	0.011636	0.20029
TNFAIP6	-4.50892	-1.44269e+08	0.746246	0.0117115	0.201294
DUSP16	-0.745267	-0.747557	4.06653	0.011885	0.203961
ZNRF3	0.762378	0.764112	3.52903	0.0119118	0.203961
HOXB-AS3	1.0781	1.083	2.55162	0.0119189	0.203961
DHFR	0.500011	0.500249	5.16419	0.0119796	0.204442
PLAC9	-1.21855	-1.23004	2.63971	0.0119933	0.204442
CUTC	0.797457	0.799771	3.71916	0.0119994	0.204442
GSDMB	-0.877576	-0.881571	3.99439	0.0120455	0.204931
COCH	0.558209	0.558853	5.02863	0.0120631	0.204933
ITFG2	0.714246	0.715756	3.86117	0.0121327	0.205816
PDIA5	-0.526765	-0.527244	5.58611	0.0121563	0.20592
USF1	0.590419	0.591211	4.54431	0.0121768	0.20597
KIF3C	-0.436755	-0.436913	6.38413	0.0122206	0.206197
DGKG	-1.61092	-1.638	2.08247	0.0122255	0.206197
KIAA1147	-0.759844	-0.761959	3.53164	0.012244	0.206213
ABCA7	-1.17644	-1.18656	2.54357	0.012281	0.206448
DDR1	-0.653719	-0.654812	4.32029	0.0122932	0.206448
HIVEP1	-0.566734	-0.567223	5.12916	0.0123896	0.20777
ZHX2	-0.965207	-0.971078	3.35513	0.0126323	0.211536
SIMC1	0.716184	0.71774	3.85328	0.0126582	0.211669
SLC25A15	0.815818	0.818487	3.47683	0.012692	0.211785
MYBL2	0.552449	0.552781	4.71387	0.0127013	0.211785
SALL4	-1.3016	-1.31238	2.08651	0.0127465	0.211886
LRFN4	0.570921	0.571432	4.83537	0.0127533	0.211886
ATP8A1	-0.924686	-0.929212	3.23692	0.0127616	0.211886
LCA5	-0.956418	-0.960427	2.9329	0.0127913	0.212079
CCDC126	-1.05271	-1.05817	3.1998	0.0128146	0.212164
LINC02035	-1.40191	-1.42369	2.49751	0.0128631	0.212667
FEM1C	0.442819	0.442977	6.14623	0.0128989	0.212959
RAPGEF2	-0.46231	-0.462519	6.29276	0.0129474	0.213458
DONSON	0.545174	0.545689	4.81815	0.0129808	0.21371
HK2	-0.574699	-0.575634	5.28359	0.0130428	0.214429
SOD3	-0.88822	-0.893355	4.38158	0.0131919	0.216576
PRUNE2	-0.896266	-0.900886	3.58148	0.0132389	0.217045
IRF1	-0.549641	-0.550263	5.4208	0.0132812	0.217433
ZNF17	-1.44286	-1.46232	1.66876	0.0134426	0.219614
CNTN5	-1.25762	-1.26854	2.03201	0.0134519	0.219614
PIK3R3	0.810208	0.812234	3.34898	0.0134899	0.219928
GKAP1	-2.4572	-2.59496	1.14747	0.0135273	0.220232
ZNF486	1.52974	1.55255	1.3432	0.0136795	0.221604
SLC2A9	1.70072	1.74519	2.10582	0.0136832	0.221604
ZNF883	0.825313	0.827602	3.28654	0.0136858	0.221604
GALK2	-0.631914	-0.633069	4.14202	0.0136872	0.221604
INKA2	-0.681703	-0.682804	4.40567	0.0137588	0.222383
LSM3	0.551199	0.551626	5.01799	0.0137831	0.222383
APBA3	-0.702955	-0.704544	4.34692	0.0138023	0.222383
ADAM19	-0.557855	-0.558299	4.75238	0.0138112	0.222383
ALOX12P2	2.89774	3.24763	2.38612	0.0139006	0.222785
MAT2A	0.380041	0.380086	7.92578	0.0139103	0.222785
HERC1	-0.420061	-0.420202	6.73846	0.0139234	0.222785
LINC00517	0.794285	0.797549	4.65313	0.0139239	0.222785
TXLNGY	-0.470977	-0.471291	6.04464	0.0139312	0.222785
WDR27	-0.647137	-0.648254	4.05473	0.0139777	0.223224
JRK	0.528668	0.529011	4.94611	0.0140066	0.223382
VPS13C	-0.435132	-0.43525	7.02068	0.0140561	0.223866
TNFAIP3	0.570971	0.571542	4.80445	0.0140783	0.223916
AVL9	-0.426767	-0.426898	6.54747	0.014129	0.224418
HEG1	-0.385392	-0.385425	8.43676	0.0141488	0.224427
USP45	-0.547203	-0.547835	4.98595	0.0142711	0.226062
PLEKHH2	-1.22481	-1.24156	3.60313	0.0143396	0.22684
MCM6	0.456375	0.456548	5.64313	0.0144179	0.227646
MORC3	-0.506606	-0.507	5.44495	0.0144293	0.227646
HES2	-1.85684	-1.91062	1.38764	0.0145129	0.228657
CCDC186	-0.54016	-0.540701	5.1935	0.014555	0.229011
ADAM23	1.80198	1.84215	1.43712	0.0145933	0.229268
JDP2	-0.618757	-0.620366	5.24029	0.0146104	0.229268
NANP	0.636414	0.637439	4.15447	0.0146933	0.230261
CCDC18-AS1	-0.701046	-0.703007	4.56051	0.0147573	0.230954
MYC	0.421195	0.421328	6.55787	0.014835	0.231861
SCAPER	-0.663252	-0.664631	4.1799	0.0148816	0.23228
AHNAK2	0.603502	0.604212	4.7954	0.014951	0.233052
CHST11	-2.80398	-3.01436	0.846901	0.0151382	0.235546
ZNF354B	-1.23675	-1.24658	2.121	0.0151512	0.235546
TMEM106A	-0.691864	-0.693582	4.16042	0.0154191	0.239092
PHKA1	0.681694	0.683163	4.33434	0.01542	0.239092
ATP10A	1.33684	1.34936	1.34642	0.0154489	0.239224
LINC00857	1.32535	1.3378	1.78985	0.0155183	0.239664
CUL4B	0.376568	0.37661	7.79672	0.0155251	0.239664
DLEU1	1.09733	1.10391	2.54232	0.0155414	0.239664
RENBP	-2.48072	-2.68252	2.20417	0.0155928	0.239664
AFF1	-0.424603	-0.424725	7.05505	0.0155989	0.239664
E2F2	1.47669	1.49383	0.973381	0.0156001	0.239664
PRKG1	-0.453318	-0.453586	6.30603	0.0156245	0.239726
TGFBI	-0.342439	-0.342441	11.5419	0.0157558	0.241424
LHX4	-1.24425	-1.25404	1.82876	0.0158723	0.242891
RAB30	-0.614628	-0.615428	4.20858	0.0159468	0.243714
GLIS2	0.597708	0.598992	5.12684	0.016097	0.245688
ANK2	-1.24498	-1.26514	3.91616	0.0163737	0.249587
TPST1	-0.598853	-0.599673	4.71573	0.0164395	0.250265
ERF	0.487962	0.488256	5.34013	0.0165405	0.251475
RAD54L2	0.478818	0.479143	5.68121	0.016719	0.253861
MYOSLID	0.849755	0.851942	2.79142	0.0167842	0.254235
MSRB1	1.15508	1.1629	2.28425	0.0167871	0.254235
CTSH	1.99432	2.06118	1.17241	0.0168975	0.255334
GPATCH4	0.517097	0.517479	5.11514	0.0169032	0.255334
ZNF841	-0.614998	-0.616316	4.23159	0.0170015	0.256488
ZNF839	-0.634056	-0.635266	3.94822	0.0170477	0.256855
ABCC9	-0.737127	-0.739032	3.77908	0.0171947	0.258737
RP9P	0.946209	0.950673	2.9297	0.0172361	0.25875
ATG4D	-0.639323	-0.640677	4.17618	0.0172397	0.25875
RPS6KA1	1.73395	1.79645	3.00959	0.0173692	0.26036
HPSE	-1.81851	-1.8802	1.90646	0.0173918	0.260367
ZBED6	-0.5969	-0.597671	4.79565	0.0174172	0.260414
CAVIN4	-1.62846	-1.66057	0.800971	0.0176081	0.262932
PDE2A	-2.45491	-2.65656	1.87288	0.0176734	0.263572
MANF	-0.435726	-0.435888	6.02989	0.0177151	0.263859
ZKSCAN1	-0.403157	-0.403277	7.15602	0.0177917	0.264579
METTL8	-0.641706	-0.642979	4.01725	0.0178086	0.264579
CDK2AP1	0.422464	0.422599	6.4409	0.0178581	0.264978
ASH1L-AS1	2.53004	2.70751	0.779034	0.0180273	0.267151
MRPS17	1.34713	1.36165	1.85884	0.0182488	0.269884
TRIM14	0.540961	0.541578	4.84301	0.0182578	0.269884
CTSF	0.731766	0.734196	3.79507	0.018377	0.271047
APBA1	0.631377	0.632783	4.33489	0.0183827	0.271047
PGAP1	-0.610886	-0.611857	4.57666	0.0185953	0.273837
REPS2	-1.80875	-1.86173	0.84855	0.0186358	0.27409
GYG1	0.455785	0.456006	6.27515	0.0186601	0.274102
CYP1B1	-0.955551	-0.958491	2.8612	0.0187553	0.274776
CRTC1	0.695876	0.697709	4.32552	0.0187585	0.274776
DDX58	-0.530138	-0.530828	4.95741	0.018787	0.274776
CLCN2	1.10571	1.11508	2.41013	0.0187997	0.274776
MCAM	-0.394106	-0.394214	7.49647	0.0188759	0.275546
HSPG2	-0.360587	-0.360598	11.3741	0.0189169	0.275623
GRIA3	1.04432	1.05813	6.29422	0.0189315	0.275623
LINC02475	-0.750116	-0.753118	4.03828	0.0189594	0.275623
MPDU1	0.510834	0.511275	4.96252	0.0189752	0.275623
FAM50B	-0.95675	-0.961393	2.71609	0.0190688	0.276185
MICAL2	0.375402	0.375435	8.01456	0.0190697	0.276185
STIM2	0.533849	0.534461	4.75413	0.0190846	0.276185
ZBTB16	1.01777	1.02249	2.67115	0.0194454	0.280945
CPTP	0.514218	0.514738	5.05323	0.0194614	0.280945
FLCN	-0.556096	-0.55704	4.73832	0.019518	0.281076
LMAN1	-0.357776	-0.357803	9.06435	0.0195185	0.281076
MAP4K4	0.373047	0.373079	8.43766	0.0195808	0.281628
KANK1	0.480906	0.481157	5.40858	0.0196595	0.282413
CDH11	-0.447545	-0.447915	6.86238	0.0197015	0.282669
SARM1	1.2444	1.25637	1.81436	0.0197689	0.28313
MT2A	0.363289	0.363293	10.7894	0.0197819	0.28313
KLF6	0.390025	0.390056	7.88351	0.0198705	0.283895
ALDH3A2	-0.510382	-0.511277	6.0584	0.0198838	0.283895
STK32C	0.972694	0.977358	2.52237	0.0199516	0.284516
HNRNPA1P48	1.26624	1.2761	2.01338	0.0200478	0.285301
RGS17	0.996506	1.00073	2.53997	0.0200553	0.285301
DBT	-0.514388	-0.514955	5.16151	0.0200814	0.285326
CUEDC2	-0.4719	-0.47221	5.507	0.0201727	0.286277
CSPP1	-0.599627	-0.600548	4.12725	0.0202423	0.286917
ME3	-0.604598	-0.605563	4.43268	0.0202852	0.287177
USP9Y	-0.454581	-0.45483	5.91109	0.0203138	0.287207
ARHGAP31	-0.488024	-0.488261	5.42093	0.0203363	0.287207
ZNF215	0.784218	0.786771	3.16144	0.0203632	0.287242
MVD	-0.446082	-0.446254	5.71784	0.0205408	0.288375
NIPBL	-0.407265	-0.407386	6.69664	0.0205463	0.288375
C8orf34	1.8902	1.9449	0.780025	0.0205543	0.288375
CHRNB1	1.79527	1.84853	1.38497	0.0205788	0.288375
MUC1	1.87443	1.92864	1.27185	0.0205817	0.288375
IGF2BP3	-0.474991	-0.475308	5.41573	0.0205927	0.288375
PABPC1L	-0.493006	-0.493482	5.44391	0.0206158	0.288375
TUT1	-0.965754	-0.971001	2.89105	0.0207975	0.290571
PA2G4	0.403714	0.403802	6.82561	0.0208413	0.290835
SESN2	-0.491074	-0.491723	6.30887	0.0209465	0.291945
PERM1	1.19821	1.20678	1.86441	0.0209771	0.291945
NFIC	0.373361	0.37341	7.64452	0.0209955	0.291945
FAM81A	1.94621	2.01221	0.980541	0.0210656	0.292572
P4HA2	-0.387372	-0.387462	7.46471	0.021126	0.293063
RFWD3	0.445682	0.445866	5.71612	0.0211889	0.293589
POLE	0.496069	0.496287	5.32432	0.0212333	0.293856
SATB1	-0.50858	-0.509181	5.66808	0.0213557	0.294874
SLC8A1	0.471124	0.47138	5.1211	0.0213571	0.294874
SUSD1	-0.546966	-0.547655	4.56105	0.0214063	0.295206
SNN	1.36887	1.3887	1.6937	0.0215999	0.297255
KIAA0895L	-0.590243	-0.591284	4.22189	0.0216057	0.297255
PLEKHN1	0.679484	0.680863	3.7471	0.021638	0.297352
ABCA6	1.67828	1.71277	0.622977	0.0216736	0.297491
TIGD5	0.675555	0.677176	3.83688	0.0217419	0.297851
SH3BP5	-1.33053	-1.34803	1.95437	0.0217506	0.297851
LBH	-1.56265	-1.60566	2.37173	0.0219287	0.29994
HIP1	0.391724	0.391788	7.24009	0.0222222	0.3036
TOX	1.44459	1.46061	1.13825	0.0222523	0.303657
CCR10	0.921096	0.926906	3.19559	0.0222908	0.303829
KIF13B	-0.52352	-0.524125	4.98656	0.0223276	0.303977
EXPH5	-1.19137	-1.20547	2.22903	0.0224101	0.304578
ZDBF2	-0.510645	-0.511271	5.13524	0.0224286	0.304578
ARMC7	0.780931	0.783292	3.54836	0.0224497	0.304578
SERPINA9	1.304	1.31441	1.33727	0.0224776	0.304604
NHLRC2	-0.469662	-0.469924	5.73662	0.0225238	0.304877
ARNT2	1.3443	1.35809	1.0456	0.0226023	0.305587
SLC1A4	-0.527804	-0.528613	5.48219	0.0227135	0.306738
ST20	-1.39479	-1.41392	1.42223	0.0228304	0.307961
SP110	0.513798	0.514327	4.76774	0.0228626	0.308041
ADAMTSL5	-0.521873	-0.52267	4.86932	0.023027	0.309899
PXK	-0.476186	-0.47657	5.50235	0.0230684	0.3101
CRELD2	-0.450565	-0.450738	5.9538	0.0231656	0.311051
CPEB2	0.388781	0.388845	7.41453	0.0233578	0.313273
PTCSC3	-1.16926	-1.17868	1.50097	0.0234251	0.313815
NYAP1	1.77878	1.83195	1.57817	0.023675	0.316802
UAP1L1	0.641688	0.643364	3.95059	0.0238235	0.318426
CHST7	0.528461	0.529163	5.11081	0.0238997	0.318904
PLCG1	0.398371	0.398476	6.6868	0.0239137	0.318904
EMILIN1	-0.405407	-0.405472	7.40124	0.0240292	0.320079
NPIPA5	1.31988	1.3408	2.08383	0.0241453	0.320949
LONRF1	-0.650992	-0.652714	4.58719	0.0241634	0.320949
LAGE3	0.681554	0.683239	3.84506	0.0241766	0.320949
ABTB2	1.30983	1.32924	2.38108	0.0243212	0.322504
NRM	-1.13835	-1.14612	1.93096	0.0243727	0.322821
CCDC191	-1.91815	-1.98184	0.983205	0.0244156	0.323024
CHST2	-0.359122	-0.359149	8.81908	0.0246695	0.325416
CLSTN1	-0.358811	-0.358844	8.36821	0.0246776	0.325416
TMEM39B	-0.568862	-0.569687	4.14273	0.0246796	0.325416
WASH7P	1.32097	1.33614	2.00286	0.0247513	0.325994
RNASEL	-0.678315	-0.680131	3.71921	0.0247993	0.32626
SSX2IP	-0.752165	-0.755191	3.52795	0.0249835	0.328217
LMBRD2	-0.47334	-0.473736	5.26447	0.0250607	0.328217
BEND6	-0.706953	-0.708921	3.51593	0.0250802	0.328217
RGS10	-0.496683	-0.497229	5.27419	0.0250937	0.328217
RBMXL1	0.558753	0.559387	4.56827	0.0251004	0.328217
ALDH5A1	0.679268	0.68197	4.59622	0.0251431	0.328217
KLF7	0.421459	0.42161	6.12542	0.025144	0.328217
CLEC3B	-0.807857	-0.810087	2.85339	0.0253271	0.330038
PAQR7	0.514452	0.51505	4.89844	0.0253399	0.330038
OTUD1	-1.05816	-1.06868	2.75324	0.0254687	0.331348
FDFT1	-0.365498	-0.365545	7.65001	0.025506	0.331464
AK4	0.448464	0.448667	5.90249	0.025723	0.33321
TNK2	-0.445642	-0.445871	5.91534	0.0257231	0.33321
ZNF555	-2.67334	-2.88112	0.763138	0.0257255	0.33321
RNF122	-2.00271	-2.09891	2.30244	0.0260182	0.336628
EEPD1	1.92397	1.98981	0.81309	0.0260586	0.33678
HEATR5A	-0.448755	-0.449132	5.95684	0.0261518	0.337612
PPIB	-0.382103	-0.382202	7.10135	0.0262422	0.337846
RPL15P3	-1.6184	-1.64769	1.20302	0.0262423	0.337846
PCDHB6	-1.48941	-1.51757	1.53633	0.0262564	0.337846
NDNF	0.499403	0.499815	4.8206	0.0264481	0.339939
B3GALNT1	-0.559382	-0.560098	4.31569	0.0264962	0.33994
RRAS2	0.42144	0.421612	6.01977	0.0265061	0.33994
CDHR3	-1.31724	-1.33301	1.15401	0.0266625	0.341433
HSPA13	-0.392789	-0.39291	7.2289	0.026693	0.341433
TEAD4	0.596136	0.597081	4.02715	0.0267102	0.341433
FGFR1OP2	-0.420404	-0.420624	6.30123	0.0267612	0.341433
AP1S3	-0.87188	-0.875879	2.72229	0.0268075	0.341433
ACVR1C	0.842154	0.845572	2.89641	0.0268128	0.341433
2020-03-04	0.394034	0.394137	6.54392	0.0268412	0.341433
CRYL1	-0.779385	-0.782784	3.64625	0.0268634	0.341433
GNAI1	-0.432405	-0.432661	5.9071	0.0268847	0.341433
PDE3A	-0.918872	-0.924182	2.82218	0.0272327	0.345368
BMP1	-0.411049	-0.411254	6.39438	0.0272535	0.345368
METTL9	0.386133	0.386235	6.85454	0.0273958	0.346381
PAM	-0.349028	-0.349056	8.91519	0.0274203	0.346381
MCM7	0.385738	0.3858	6.72064	0.0274221	0.346381
ENPP2	-1.51854	-1.54682	1.70277	0.0277061	0.349274
PLA2G4A	-0.720359	-0.722757	3.5406	0.0277107	0.349274
GNG4	-1.50857	-1.52851	1.74214	0.0277549	0.349455
RIBC2	1.38456	1.40107	0.912606	0.0278341	0.350077
CDC42EP5	0.743449	0.746339	4.31196	0.0278729	0.350189
LCMT2	0.588923	0.589812	3.98169	0.0279248	0.350465
KCMF1	0.398746	0.398881	6.50927	0.0281806	0.353297
ZNF790	-1.43188	-1.45949	1.97328	0.0284709	0.356556
COL9A2	-1.45042	-1.48074	1.91872	0.028615	0.357977
TENT5A	-0.492245	-0.493002	5.35367	0.0286662	0.358235
MILR1	-1.78936	-1.85088	1.36298	0.0288737	0.360168
USP13	0.416952	0.417098	6.03282	0.0288843	0.360168
TMEM231	-0.807722	-0.812248	3.41401	0.028913	0.360168
ARRB1	-1.79968	-1.87334	1.77607	0.0291234	0.362404
THEM4	0.830504	0.833772	3.22812	0.0291674	0.362567
TFPI2	0.382151	0.382219	6.79018	0.0292039	0.362636
PM20D2	-0.42589	-0.42605	5.61922	0.0293106	0.363546
RAB32	-0.403081	-0.403235	6.42208	0.0293392	0.363546
PHACTR1	-1.12613	-1.13667	1.92093	0.0293895	0.363785
DENND1A	-0.512011	-0.5126	4.72923	0.0296219	0.365663
BCAS4	0.889613	0.894303	2.90464	0.0296228	0.365663
NEXN-AS1	0.947565	0.951784	2.30127	0.0296349	0.365663
STAP2	-1.70921	-1.75419	1.72559	0.0296925	0.365942
C2CD2	0.413322	0.413422	6.67319	0.02973	0.365942
DENND5B	-0.473306	-0.473767	5.36797	0.0297511	0.365942
MIR4527HG	-0.69937	-0.701569	3.62268	0.0297892	0.366026
DPY19L2P2	1.36875	1.38614	0.88121	0.0298548	0.366449
PATZ1	0.53544	0.536138	4.24661	0.030018	0.368066
HNRNPCP2	1.09949	1.10848	2.08166	0.0301181	0.368908
SDHB	0.420218	0.420412	6.1295	0.030163	0.369072
FKBP7	-0.493338	-0.493948	5.29311	0.0301945	0.369072
GGT7	-0.467912	-0.46842	5.45492	0.0303065	0.370055
FBLIM1	-0.387484	-0.387595	6.77677	0.0304226	0.370445
VIM-AS1	-1.82407	-1.87712	0.767146	0.0304371	0.370445
ELOF1	0.53035	0.530949	4.72055	0.0304457	0.370445
CMTM3	-0.545879	-0.546585	4.50767	0.0304648	0.370445
NR3C1	0.378731	0.378816	6.89279	0.0305137	0.370654
PHGDH	-0.427583	-0.427948	7.25979	0.0305475	0.370682
TBC1D19	-0.501461	-0.501939	4.66339	0.0306668	0.371688
MT1L	0.386735	0.38681	6.53356	0.0306939	0.371688
C16orf58	-0.433815	-0.434087	5.95028	0.0307323	0.371769
NR2C2AP	0.782656	0.785045	2.91271	0.0308469	0.372771
ISL1	-1.11269	-1.12248	1.61672	0.0309781	0.373971
ZFAND2A	-0.695769	-0.697591	3.34919	0.0310764	0.374771
SLC45A1	1.50398	1.54055	1.56875	0.0311611	0.375406
STOML1	-0.526952	-0.527519	4.61149	0.0314262	0.378211
BICD1	-0.445796	-0.446137	5.36428	0.0315068	0.378792
DNALI1	0.838688	0.844455	3.57331	0.0316594	0.380237
DET1	-0.943614	-0.948804	2.6794	0.0318654	0.382319
CARMIL1	0.483207	0.483545	4.95472	0.0319788	0.383288
VAMP2	0.447416	0.447766	5.53006	0.0320449	0.383688
SYTL4	-0.487975	-0.488456	4.84833	0.0322136	0.385314
DNAJB11	-0.389441	-0.389563	6.55572	0.0322721	0.385621
HLA-DPA1	1.58059	1.64019	2.57205	0.0323163	0.385755
ZNF221	-1.23273	-1.2471	1.52778	0.0324131	0.386517
FAM136A	0.450411	0.450724	5.38581	0.0324499	0.386563
ZBTB11	-0.454733	-0.455116	5.24541	0.032501	0.386779
NLGN4Y	-0.519277	-0.519935	4.5915	0.0328713	0.389769
ZNF587B	0.774046	0.776645	2.98241	0.0328991	0.389769
OSR1	0.492881	0.493255	4.56382	0.0329033	0.389769
DKK3	-0.338635	-0.338652	9.18193	0.0329113	0.389769
HAUS5	0.614333	0.615519	3.75263	0.0329186	0.389769
DUSP22	0.646058	0.647998	3.67224	0.0329756	0.390051
HINT3	-0.46365	-0.464166	5.3519	0.0330778	0.390865
GLO1	0.362748	0.362798	7.46009	0.0331417	0.391225
ERMP1	-0.454927	-0.455319	5.35347	0.0333393	0.393162
DNAH8	1.1941	1.2048	1.31164	0.0333878	0.393176
CMTM7	0.638171	0.639789	4.24274	0.0334076	0.393176
ZNF512B	0.440654	0.440929	5.65219	0.0334859	0.393703
ZNF789	0.761117	0.763225	3.16509	0.0335539	0.394107
ELMO3	-1.2768	-1.29737	1.63087	0.0336508	0.39485
BCL7A	0.489022	0.489598	4.97685	0.0337064	0.394885
LPP-AS2	1.27754	1.28969	1.19176	0.0337212	0.394885
FAIM	0.516555	0.517256	4.43458	0.0337707	0.394895
METTL17	0.543162	0.544004	4.19344	0.0338087	0.394895
MMAB	-0.518776	-0.519508	4.29139	0.0338578	0.394895
ZNF324	-0.825529	-0.829047	2.68488	0.0338752	0.394895
LRP1	-0.336667	-0.336675	10.5203	0.0338905	0.394895
RSBN1L	0.461641	0.462048	4.976	0.0339356	0.39502
MSRA	1.24136	1.25786	2.44674	0.0339843	0.39502
ULK1	-0.442072	-0.442481	5.72934	0.0340023	0.39502
JAG1	-0.56574	-0.566561	4.21041	0.0341498	0.396325
P3H3	-0.395264	-0.395357	7.23065	0.0341823	0.396325
GJA1	1.3117	1.33109	1.16329	0.0344274	0.398393
RNASET2	-0.670987	-0.673169	3.68661	0.0344286	0.398393
MAP4K3-DT	-0.925015	-0.931075	2.96659	0.0346817	0.400926
IDS	-0.380414	-0.380538	7.00646	0.0348189	0.402116
SPATA2L	-0.658826	-0.660908	3.69764	0.0350366	0.404231
ACSS3	-0.766288	-0.769539	4.58754	0.0352397	0.405587
PTPRU	1.24563	1.26441	1.83301	0.0352539	0.405587
PHYKPL	0.521327	0.52232	4.50901	0.0352579	0.405587
FICD	-0.591975	-0.593103	4.10611	0.0353033	0.405711
ZNF264	-0.809216	-0.812431	2.93024	0.0353683	0.405805
TPM1	-0.344421	-0.344444	9.23361	0.0353888	0.405805
RXRB	-0.512864	-0.513654	4.49462	0.0354716	0.405805
CFLAR	0.378504	0.378596	6.96501	0.0354891	0.405805
ROBO1	-0.380036	-0.380161	7.30384	0.0355092	0.405805
GOLGA4	-0.353566	-0.35361	8.22438	0.0355498	0.405805
PLEKHA5	-0.439752	-0.440198	5.76141	0.0355538	0.405805
ZBTB7B	-0.448644	-0.449138	5.69679	0.035594	0.405868
FBXO41	0.486661	0.487251	5.0621	0.0356686	0.406324
TCAF1	-0.432329	-0.432674	5.77468	0.0357787	0.406509
PSMB8	-0.549302	-0.55043	5.002	0.0357804	0.406509
PEX11B	0.500191	0.500831	4.53062	0.0358077	0.406509
FBLN5	0.461872	0.462332	5.14651	0.0358308	0.406509
ROBO4	-0.452486	-0.452803	5.00683	0.0359077	0.406509
DEDD2	-0.552217	-0.553433	4.54555	0.0359169	0.406509
SLC25A16	0.519845	0.520568	4.45339	0.0359591	0.406509
MIF4GD	1.38499	1.41299	1.95552	0.0359623	0.406509
UBA2	0.372401	0.372479	7.08673	0.0361454	0.408185
PMS2	0.649147	0.651326	3.65021	0.0362488	0.408959
COQ5	-0.509143	-0.509837	4.64083	0.0363124	0.40897
SSBP2	-0.648626	-0.650465	3.99632	0.0363195	0.40897
CDK5R1	0.761021	0.763693	3.01117	0.0365603	0.411004
CDT1	0.481193	0.481539	4.47945	0.0365703	0.411004
PKIG	-0.458746	-0.459094	4.8974	0.0367296	0.412399
SGK1	0.506057	0.506504	4.54942	0.0367656	0.412408
ZNF567	-1.15669	-1.16747	1.9131	0.036915	0.413688
MRPL20-AS1	-0.629336	-0.630808	3.63257	0.0369668	0.413873
LINC02609	-1.71147	-1.78327	1.73306	0.0370371	0.414264
RAB3IL1	3.87544	1.44269e+08	0.760974	0.0371409	0.41448
OSBP	-0.377771	-0.377887	6.81708	0.0371668	0.41448
CCDC58	0.684462	0.686214	3.42137	0.0371743	0.41448
ULK3	0.523246	0.524093	4.49226	0.0372213	0.41448
SWI5	0.530415	0.531307	4.35204	0.0372332	0.41448
TLCD2	-1.67305	-1.72398	1.13332	0.0375924	0.417807
AGA	-0.490245	-0.490896	4.74669	0.0376318	0.417807
C8orf48	1.20504	1.2179	1.23932	0.037639	0.417807
MFAP5	-0.531908	-0.532591	4.02804	0.0378332	0.419566
RPS3AP6	-1.37133	-1.39276	1.89892	0.0380084	0.421111
CBR3	0.615938	0.617394	3.44639	0.0381874	0.422694
RP2	-0.419182	-0.419384	5.56389	0.0382258	0.422719
TRIQK	-0.793345	-0.796631	3.32591	0.0383491	0.423331
ST3GAL3	-0.47451	-0.474977	5.1543	0.0383533	0.423331
C11orf54	-0.577179	-0.578486	3.87699	0.0384273	0.423497
CRYZ	-0.396469	-0.39663	5.97466	0.0384406	0.423497
PPARA	-0.447609	-0.448004	5.59329	0.0385185	0.423957
ETNK1	-0.391342	-0.391496	6.51165	0.0387086	0.42565
FGF1	0.413226	0.413462	6.08632	0.0387748	0.425977
ZFP36L2	0.411546	0.411683	5.95983	0.0388621	0.426537
GOLT1B	-0.379496	-0.379621	6.94535	0.0389765	0.427188
POLR1B	0.484868	0.485419	4.94186	0.0389943	0.427188
ARSD	-0.531151	-0.53232	4.57769	0.0394786	0.43209
R3HCC1L	-0.528479	-0.529516	4.9094	0.0397109	0.434227
MZF1	-0.482017	-0.482774	5.09729	0.0399676	0.436541
IFI27	1.95307	2.11337	4.4787	0.039997	0.436541
PCDHGA2	-1.26384	-1.2792	1.80738	0.0401205	0.437481
STMN1	0.347698	0.347723	7.97026	0.0402901	0.438856
ZNF462	-0.639791	-0.641357	3.80671	0.0403214	0.438856
CALML4	0.723587	0.726055	3.12631	0.0404108	0.439421
PSMB9	-0.631395	-0.633632	4.65411	0.0405169	0.440051
BRWD3	-0.498822	-0.499449	5.18251	0.0405765	0.440051
ENTR1	0.427295	0.427582	5.50743	0.0405854	0.440051
SPSB1	-0.516011	-0.516668	4.22281	0.040619	0.440051
MYEOV	0.465757	0.466108	4.54799	0.0407839	0.44143
TBX3	0.33692	0.336946	8.73143	0.040923	0.442527
ZNF197	-0.530392	-0.531307	4.34471	0.0410579	0.442874
DCAF6	0.384509	0.384641	6.25039	0.0410972	0.442874
ZNF525	-0.921854	-0.92747	2.24795	0.0410977	0.442874
TBC1D8B	-0.425268	-0.425641	5.7138	0.0411062	0.442874
ADGRB2	-1.32421	-1.35553	2.95007	0.0411651	0.443102
RAD18	0.47504	0.475383	4.78012	0.0412872	0.444008
LIMD2	0.738577	0.74103	3.27125	0.0413494	0.444269
APOLD1	-0.502156	-0.502851	4.42306	0.0415845	0.446386
SCAI	-0.617277	-0.618505	3.71108	0.041806	0.448353
TRAPPC12	0.417343	0.417557	5.83741	0.0419188	0.449151
MFAP2	-0.482988	-0.4837	4.78845	0.0420194	0.449545
WNT5A	-0.328464	-0.328469	10.5291	0.0420322	0.449545
OBSL1	-0.421619	-0.421864	5.94432	0.0424152	0.453227
PPDPF	0.357146	0.357228	7.21519	0.0425394	0.454141
MLLT3	-0.430805	-0.431193	5.54866	0.0425995	0.454369
PROX2	-2.83138	-3.22585	0.692655	0.0426569	0.454567
EZH2	0.506016	0.506526	4.14197	0.0428852	0.456585
FSIP2	-3.38745	-1.44269e+08	4.18828	0.0429438	0.456794
ABHD6	-0.720159	-0.723265	3.23208	0.0431152	0.457475
TRIB2	-0.651595	-0.654485	3.98129	0.043119	0.457475
MOSPD2	-0.454064	-0.454483	5.09179	0.0431249	0.457475
EIF1AD	0.545683	0.546574	4.14422	0.0432048	0.457908
PIGK	-0.371114	-0.371229	6.45542	0.0432819	0.458311
LIF	-0.41279	-0.412989	5.50188	0.0433341	0.458449
CHMP2B	-0.407184	-0.407408	5.91624	0.0435074	0.459703
SRRM3	-0.680358	-0.683024	3.63289	0.043531	0.459703
SLC25A44	0.456469	0.456951	4.84475	0.0436092	0.460114
HAND2-AS1	0.398122	0.398271	6.26915	0.0437162	0.460829
ARID2	-0.428999	-0.429407	5.44138	0.0438113	0.461158
GBAP1	1.00939	1.01761	1.98359	0.0438261	0.461158
PRPF4	0.413315	0.413547	5.55632	0.0439099	0.461625
ADAM1A	1.03255	1.04151	1.79889	0.0440416	0.462595
FDPS	-0.373403	-0.373498	6.57064	0.0441003	0.462797
BPGM	-0.556963	-0.558035	4.1741	0.0444292	0.465699
SERTAD1	0.501185	0.50188	4.65553	0.0444956	0.465699
SLC46A3	-0.590715	-0.592003	3.57442	0.0444961	0.465699
ACAT2	-0.410792	-0.410962	5.3391	0.0447464	0.467738
FHOD3	0.829784	0.834332	2.519	0.0448406	0.467738
HLA-A	-0.454147	-0.454809	6.43097	0.0448927	0.467738
VLDLR	1.30032	1.33009	2.89406	0.0449085	0.467738
CACNA2D4	-1.67989	-1.73891	1.52372	0.0449341	0.467738
CDADC1	-0.822255	-0.82701	2.83623	0.0449599	0.467738
GPR63	0.698195	0.701196	3.49447	0.0450077	0.467738
ZNF85	-1.1711	-1.17993	1.82071	0.0450101	0.467738
PARN	0.440108	0.440478	5.03072	0.0451683	0.468933
BRMS1L	0.596793	0.59832	3.84196	0.0452051	0.468933
NPHP3	0.388538	0.388744	6.15	0.0452734	0.468998
ING2	0.662295	0.664249	3.13634	0.0452914	0.468998
TLN2	0.863917	0.869626	2.50138	0.0454032	0.469383
PLOD3	-0.349986	-0.350044	7.6775	0.0454086	0.469383
PPP3CB-AS1	1.12221	1.13665	1.64807	0.0454853	0.469761
RPL27	0.347483	0.347512	8.45322	0.0455322	0.469831
TSPAN12	-0.680738	-0.682832	3.22571	0.0456056	0.470175
PLA2G16	-0.771285	-0.774473	3.40489	0.0456906	0.470423
CALM2	-0.328999	-0.32901	9.58286	0.0457099	0.470423
ITGAE	-0.586549	-0.587715	3.6211	0.0460138	0.473135
ADAMTS5	-0.797838	-0.801589	2.60193	0.0462483	0.475129
ZNF688	-0.819577	-0.824126	2.98071	0.04639	0.475761
MRPS18C	0.657841	0.659651	3.40211	0.046391	0.475761
SIN3B	-0.371833	-0.371971	6.58592	0.0464558	0.47601
ACAA2	0.500224	0.500908	4.38441	0.0466288	0.477365
TUBE1	-0.541605	-0.543213	4.6	0.0467698	0.478259
SHPRH	-0.546553	-0.547762	3.97144	0.0468743	0.478259
FEM1A	1.60665	1.65702	1.11913	0.0468755	0.478259
MICALL2	0.480732	0.481371	4.88095	0.0469132	0.478259
SMPD1	-0.361392	-0.361481	7.20081	0.0469201	0.478259
HLA-C	-0.577262	-0.579778	5.48386	0.0472184	0.480633
LINC01583	-0.96671	-0.972683	2.05508	0.0472781	0.480633
APOL1	-0.431077	-0.431539	5.39594	0.0473124	0.480633
EPAS1	-0.410144	-0.410497	6.554	0.0473253	0.480633
ALG13	-0.456771	-0.457215	5.10132	0.0473581	0.480633
SLC25A1	-0.350046	-0.350096	7.43667	0.0474637	0.481289
TTYH3	-0.354167	-0.35423	7.91933	0.0477176	0.483445
ZBTB20	-0.923337	-0.929915	2.44665	0.0478059	0.483761
NETO1	-0.554096	-0.555591	3.94696	0.0478924	0.483761
WDR3	0.401686	0.401933	5.7859	0.0479221	0.483761
PNISR	-0.359434	-0.359534	7.02831	0.0479248	0.483761
PSG9	1.00942	1.01732	1.49971	0.0479551	0.483761
MCM4	0.364101	0.364156	6.7512	0.0482005	0.485818
GDNF	0.675806	0.677451	3.05023	0.0483084	0.48582
HS3ST3A1	-0.441129	-0.441522	4.8407	0.0483187	0.48582
SLC25A20	-0.512831	-0.513646	4.36578	0.048325	0.48582
FCRLB	1.03228	1.04676	2.78284	0.0485532	0.487559
TMPO-AS1	1.27128	1.28908	0.750158	0.0485812	0.487559
MOSPD1	0.546823	0.547897	4.038	0.0487384	0.488718
MFAP4	-1.97527	-2.10064	1.73992	0.0489058	0.489978
AREG	3.57037	1.44269e+08	2.98097	0.0490622	0.491124
ERAP2	-0.358564	-0.358664	6.8423	0.0492473	0.492557
ACADSB	0.447721	0.448124	4.9728	0.0493283	0.492947
ENDOD1	0.346036	0.346087	7.64223	0.0494363	0.493605
ACAD10	-0.505039	-0.506044	4.12259	0.04955	0.493725
ADM2	-2.41068	-2.78679	3.48672	0.0496365	0.493725
MOV10	-0.385029	-0.38523	6.02792	0.0496485	0.493725
CETN3	-0.488714	-0.489431	4.37979	0.0496587	0.493725
POU2F2	-1.06651	-1.07953	2.53391	0.0496589	0.493725
KIAA1549	-0.513446	-0.51436	4.56944	0.0497358	0.494071
MFSD13A	2.20244	2.37122	1.03723	0.0498725	0.494095
HS3ST3B1	0.413774	0.414042	5.79612	0.0498875	0.494095
SLC2A12	-1.26727	-1.28927	1.34442	0.0499038	0.494095
HNRNPD	0.338258	0.338294	7.84399	0.049935	0.494095
HIRIP3	0.493684	0.494287	3.87878	0.0499491	0.494095
SMARCC1	0.360352	0.360444	6.7333	0.0500563	0.494488
ATP5MF	0.438308	0.438696	5.06125	0.0500905	0.494488
ATAT1	-0.800313	-0.804648	2.66356	0.0501154	0.494488
MGMT	0.916778	0.924406	2.64538	0.0502534	0.495433
SOX13	0.761734	0.76533	3.3037	0.0504312	0.496229
IFT80	-0.491628	-0.492422	4.31788	0.0504476	0.496229
ALDH1L2	-0.348467	-0.348556	8.05728	0.0504611	0.496229
STARD8	-0.806398	-0.809903	2.66643	0.0505167	0.496359
ZBTB1	-0.409916	-0.410204	5.56569	0.0506426	0.49718
LRRC49	-0.784726	-0.789632	2.8333	0.0507139	0.497463
C1orf54	-0.745915	-0.749689	2.98366	0.0507638	0.497537
NBEAL2	-0.571898	-0.573282	4.01546	0.0508452	0.49784
KIAA0355	0.392878	0.393104	5.77534	0.0508797	0.49784
KRT14	1.33326	1.34944	1.01496	0.0509252	0.497869
LRRC37A2	-1.59969	-1.64943	0.862882	0.0510007	0.497883
PYROXD1	0.583554	0.585113	3.73672	0.0510115	0.497883
GRAMD1C	-0.818886	-0.823111	2.42425	0.0510929	0.498262
ASTE1	0.845394	0.85216	2.83577	0.0511567	0.498412
TRIM16	-0.594889	-0.596279	3.57567	0.0512185	0.498412
KARS	0.359621	0.359709	6.93284	0.0512358	0.498412
DUSP6	0.491908	0.49255	4.13923	0.0513153	0.498771
PTER	0.54475	0.545963	4.12555	0.0515414	0.5002
KIAA1586	0.609626	0.611097	3.68616	0.0515535	0.5002
SLC25A42	0.673596	0.676241	3.43786	0.0515903	0.5002
NEAT1	0.332329	0.332368	8.67279	0.0518792	0.502276
CD40	1.19466	1.21069	2.28556	0.0518901	0.502276
PIGF	-0.571421	-0.572864	3.6469	0.0521431	0.50423
PCBD2	0.999454	1.00939	2.07889	0.052178	0.50423
BAK1	0.491417	0.492216	4.48783	0.0522309	0.504325
SNX16	-0.632735	-0.634766	3.81294	0.0524335	0.505865
WDR20	0.458635	0.459223	4.60146	0.0525909	0.506879
PCYOX1L	-0.817762	-0.823241	2.83934	0.0526251	0.506879
ATP11A	-0.511352	-0.512289	4.14155	0.0527907	0.506897
MAPK8	-0.392178	-0.392379	5.6546	0.0528005	0.506897
FNDC3B	-0.339343	-0.339382	7.99631	0.0528197	0.506897
PYCR1	-0.386655	-0.386902	6.23836	0.0528257	0.506897
SSR1	-0.341762	-0.3418	8.07474	0.0528809	0.506897
FAM133B	0.571697	0.573012	3.59768	0.0528864	0.506897
NET1	0.491808	0.49233	4.18668	0.0530664	0.508206
TESPA1	0.942682	0.950025	2.40457	0.053123	0.508333
PCDHGB2	0.643841	0.646257	3.57172	0.0532334	0.508974
CCZ1	0.647759	0.650018	3.3239	0.0533671	0.509836
HR	-2.32199	-2.51961	1.05031	0.0535212	0.510893
TSHZ3	0.410918	0.411177	5.35691	0.0535874	0.510898
WASHC3	-0.486006	-0.486718	4.24868	0.0536089	0.510898
WDR12	0.409222	0.409529	5.35271	0.0537369	0.511701
DKC1	0.380867	0.381003	6.21513	0.0537841	0.511735
ZNF432	-0.577516	-0.579152	3.69917	0.0538614	0.512054
VSTM5	1.33518	1.35633	1.38749	0.054012	0.51307
FLOT1	0.363067	0.363141	7.08082	0.0541752	0.514203
RABIF	0.554707	0.555678	3.74016	0.0542352	0.514357
ZNF267	-0.643442	-0.645407	3.4243	0.0542929	0.514488
GREB1L	0.792914	0.797526	2.8164	0.0544137	0.515216
NETO2	0.386918	0.387091	5.57416	0.0546113	0.516669
PEX5L	-1.57133	-1.62858	2.49046	0.0546754	0.516859
UBAP2L	0.358492	0.358552	7.39776	0.0547215	0.516878
IFITM10	1.29116	1.3209	1.98902	0.054825	0.517439
GOPC	-0.353239	-0.353324	6.87369	0.0548819	0.517559
BTRC	-0.423648	-0.424068	5.1876	0.0551696	0.519698
RAB33B	-0.520608	-0.521769	4.1463	0.0551974	0.519698
VCPKMT	-0.764638	-0.768477	2.63095	0.0553477	0.520695
DCAF15	0.471837	0.472406	4.33575	0.0555586	0.521734
DLL1	-0.825361	-0.830369	2.95876	0.055635	0.521734
DENND4A	-0.390504	-0.39076	5.76307	0.0556543	0.521734
SNCAIP	-0.789445	-0.79245	2.36367	0.055671	0.521734
ZNF721	-0.533471	-0.534507	3.97213	0.0557023	0.521734
GALM	0.704045	0.706643	3.02532	0.0557253	0.521734
PCSK5	3.86151	1.44269e+08	0.724715	0.055811	0.52212
GNG2	-0.506199	-0.506926	3.99329	0.0561163	0.524386
KCNMA1	-0.364782	-0.364887	6.1944	0.0561708	0.524386
RIN3	-0.385302	-0.385538	5.94258	0.0561874	0.524386
RNF227	0.89309	0.899129	2.5494	0.0562652	0.524392
EBNA1BP2	0.380669	0.380813	6.1357	0.0562775	0.524392
KRT18	0.338067	0.338111	7.42519	0.0563751	0.524884
AMH	-2.61408	-3.00047	0.844529	0.0564433	0.525102
ITFG1	-0.370774	-0.370916	6.45941	0.0565103	0.525308
ANKRD10	-0.405925	-0.406235	5.39584	0.0566031	0.52551
PUS10	-0.89217	-0.898548	2.39437	0.0566216	0.52551
METTL21A	-0.835599	-0.840965	2.86586	0.0567138	0.525743
SMIM10L2B	0.84465	0.851414	3.16014	0.05677	0.525743
CTHRC1	-0.350956	-0.351018	7.06156	0.0567813	0.525743
PARP8	-0.478001	-0.478659	4.82404	0.0569185	0.526597
CHPF2	-0.347321	-0.347396	7.16905	0.0571104	0.527955
FAM20C	1.52546	1.59819	7.60723	0.0571889	0.528265
RAD54B	1.0565	1.06635	1.43494	0.0572748	0.528642
TRIM2	-0.412147	-0.412426	5.19764	0.0573857	0.528869
FAM234A	-0.433196	-0.433574	5.62016	0.0575156	0.528869
MCTP1	-1.44414	-1.481	1.51273	0.0575181	0.528869
CAV2	0.340509	0.340568	7.37707	0.0575255	0.528869
CRCP	-0.399984	-0.400235	5.40756	0.0575656	0.528869
SOCS2	0.553297	0.554706	3.79485	0.0576113	0.528869
KIAA1522	-0.579689	-0.581406	3.67666	0.0576557	0.528869
TIPARP	0.348471	0.348522	7.60964	0.0577219	0.528869
CREBRF	-0.497082	-0.498086	4.47537	0.0577233	0.528869
ATXN2	0.364528	0.364648	6.61567	0.0577505	0.528869
ISG20L2	0.444069	0.444587	4.83643	0.0579656	0.530141
ZNF579	0.469015	0.469692	4.76752	0.0580268	0.530141
ZC3H11A	-0.336683	-0.33674	7.63316	0.0580635	0.530141
MRAS	0.414581	0.414966	5.5556	0.0580704	0.530141
TNFRSF25	-0.467819	-0.468501	4.67511	0.0581608	0.530553
BTN3A2	-0.387696	-0.387926	6.48941	0.0585148	0.533367
ZNF529	0.661482	0.663575	3.51931	0.0586675	0.534157
RLF	-0.458402	-0.458921	4.64254	0.0586985	0.534157
ZP3	1.29786	1.32473	2.06983	0.0587381	0.534157
SMIM8	0.974297	0.982263	1.91845	0.0588046	0.534347
NPL	1.29418	1.32105	1.43785	0.0588722	0.534547
GAB2	-0.396777	-0.39708	5.74006	0.0589945	0.535243
IRF2BPL	-0.408705	-0.408934	5.45622	0.0590436	0.535274
MIA3	-0.351732	-0.351841	6.9652	0.059134	0.535679
SSPN	-1.51488	-1.56326	1.32921	0.0594392	0.537791
AASDH	-0.584856	-0.586728	3.98571	0.0594986	0.537791
CEP89	0.435724	0.436063	4.88028	0.0595048	0.537791
CEP97	-0.435984	-0.436362	4.90701	0.0595753	0.538014
FNIP1	-0.406444	-0.40681	5.55855	0.059693	0.538662
TMSB15A	0.886531	0.891088	1.76468	0.0598084	0.539288
THEM6	0.552069	0.553357	3.56065	0.059951	0.540158
LAMA2	-0.330563	-0.330608	8.41318	0.0600879	0.540788
MTHFD1	0.370991	0.371092	6.25479	0.0601132	0.540788
SLC9A3-AS1	-0.469481	-0.470193	4.4804	0.0602027	0.541178
TDRD6	-2.63793	-3.02451	1.13017	0.0603372	0.541972
NRG1	-0.598307	-0.599718	3.22301	0.060441	0.542173
ERVK3-1	0.6787	0.681355	3.18224	0.0604521	0.542173
ATAD3B	0.435554	0.435905	4.96388	0.0605016	0.542202
PDF	0.80152	0.806383	2.88005	0.060591	0.542301
SRSF6	0.337228	0.337273	7.5303	0.0606052	0.542301
SERPINH1	-0.327417	-0.327455	8.23313	0.0607796	0.543447
ALKBH2	0.72647	0.728898	3.04604	0.061047	0.545422
MAP1LC3A	0.414317	0.414613	5.497	0.0613319	0.54755
TTC3	-0.322959	-0.32299	8.63973	0.0614063	0.547797
ATP7B	-1.04728	-1.06083	1.91455	0.0615495	0.548478
KAZALD1	1.47442	1.52246	1.83802	0.0615763	0.548478
PRPF38A	-0.441036	-0.441458	4.96088	0.0617221	0.549345
C3orf62	0.662417	0.664938	3.01896	0.0617673	0.549345
TMEM218	-0.517616	-0.518435	3.94112	0.0620231	0.551202
S100A3	-0.605148	-0.606958	3.13724	0.0620746	0.551241
CLIP4	-0.359491	-0.359611	6.89525	0.0622719	0.552472
PPP1R10	-0.41215	-0.412497	5.22024	0.0623074	0.552472
PLS1	-0.895762	-0.902521	2.10643	0.0624875	0.55365
NMT2	0.40029	0.400593	5.36477	0.0626912	0.555035
MANBA	-0.443581	-0.444365	5.27145	0.0628441	0.555969
EXT2	-0.341796	-0.341871	7.29112	0.0629298	0.556307
GLRB	-0.529049	-0.53027	4.40807	0.0631818	0.558114
NDUFA4L2	2.46427	2.79688	1.24525	0.0632565	0.558176
TGS1	0.410976	0.411348	5.03587	0.0633133	0.558176
GLS	-0.335943	-0.335988	7.73668	0.063334	0.558176
PPM1J	2.45088	2.78338	0.842404	0.0633793	0.558176
NUAK2	0.573294	0.574778	3.35049	0.0635554	0.559307
PIGX	-0.436928	-0.437433	4.56837	0.0636432	0.559659
TCEAL7	-1.02841	-1.03715	2.36439	0.0637353	0.560049
KCTD16	-0.526004	-0.527093	3.94903	0.0638145	0.560325
THNSL1	-0.952551	-0.959218	1.81161	0.0639709	0.561277
UBR7	0.397828	0.398065	5.16444	0.0641119	0.562094
SLC25A25	-0.452604	-0.453321	4.80693	0.0642519	0.562264
ATRX	-0.337041	-0.337101	7.46365	0.0643261	0.562264
TOR1A	0.368542	0.368696	6.05439	0.0643805	0.562264
ZFAND1	-0.407096	-0.407546	5.22864	0.0644082	0.562264
RELL2	-0.929958	-0.938439	2.75034	0.064427	0.562264
WASH3P	0.598073	0.600225	3.3989	0.0644337	0.562264
DECR1	-0.392767	-0.393047	5.37446	0.0644671	0.562264
HCFC2	-0.421087	-0.421537	4.76693	0.064557	0.56263
ZNF565	-1.1689	-1.18725	1.89839	0.0646342	0.562884
TMCC1	-0.478843	-0.479845	4.37499	0.0646859	0.562917
TGM2	0.315807	0.315818	9.31547	0.0647679	0.563211
ACTR1B	-0.353475	-0.353568	6.89089	0.0648854	0.563815
LINC01137	-1.48701	-1.52891	1.01274	0.0649453	0.563917
PSME2	0.364036	0.364159	6.55197	0.0650331	0.564262
CASP7	-0.424801	-0.42529	4.85585	0.0651059	0.564476
LINC00662	-0.596803	-0.599169	3.84451	0.0652024	0.564894
USP19	-0.370312	-0.370514	5.87117	0.0654517	0.566287
LINC00888	-0.576482	-0.578083	3.65884	0.0654597	0.566287
PAIP2	0.424794	0.425201	5.04451	0.0656031	0.56633
SLC25A45	-1.42398	-1.46476	0.924	0.0656142	0.56633
ZNF112	-0.928482	-0.935025	2.30618	0.0656379	0.56633
PCK2	-0.391677	-0.3921	6.49109	0.0656724	0.56633
COLGALT1	-0.322377	-0.32241	8.44885	0.0657398	0.56633
NAV3	-0.363942	-0.364053	6.2929	0.0657545	0.56633
NID1	-0.335747	-0.335805	7.21363	0.0658599	0.566676
NMNAT2	0.418163	0.418434	4.76498	0.0658914	0.566676
MATN2	-0.935736	-0.945369	2.27338	0.0659516	0.566778
NLK	0.551814	0.553132	3.79374	0.0660058	0.566827
ARAP2	-0.473495	-0.474239	4.95406	0.0661708	0.567714
METTL23	-0.523413	-0.524637	3.90955	0.0662059	0.567714
CRISPLD2	-0.349666	-0.349787	7.40492	0.0662601	0.567764
PRTFDC1	0.414099	0.414426	4.74719	0.0663582	0.568189
CDR2L	-0.354036	-0.354182	6.62154	0.0665808	0.568993
QPCTL	-0.455938	-0.456763	4.72899	0.0666041	0.568993
TMEM268	0.548781	0.550529	3.91477	0.0666062	0.568993
EDEM3	-0.342719	-0.342805	7.32067	0.0666462	0.568993
LTO1	0.46554	0.466158	4.33292	0.0667985	0.569844
CLP1	0.569367	0.57075	3.55882	0.0668432	0.569844
PMS1	-0.425426	-0.425912	4.78479	0.0671592	0.57186
KHSRP	0.33796	0.338003	7.55823	0.0672159	0.57186
LTBP3	0.3575	0.357607	7.30471	0.067226	0.57186
SERINC5	-0.76846	-0.773129	2.75614	0.0673449	0.572456
GABPA	-0.396578	-0.396832	5.61192	0.0674138	0.572627
NRXN1	-2.41289	-2.78898	1.13298	0.0675852	0.573666
PTPN18	0.406879	0.407198	5.02933	0.0676749	0.574013
EPOR	-0.610069	-0.612634	3.64831	0.0677801	0.574469
TLR6	0.746301	0.748786	2.75276	0.0678632	0.574469
METTL22	0.453369	0.454132	4.6575	0.0678757	0.574469
NUTF2	0.336984	0.33706	7.23341	0.067968	0.574584
ZNF585A	-1.19138	-1.21245	1.60079	0.0679873	0.574584
TESK2	-1.13169	-1.14858	1.51502	0.0680918	0.575052
GFOD1	0.686241	0.690251	3.18833	0.0683431	0.576759
MSANTD4	-0.387482	-0.387788	5.5519	0.0683982	0.576808
BNIP3P4	1.02006	1.03057	1.69305	0.0684691	0.576849
SH3YL1	-0.480233	-0.48109	4.57741	0.0685014	0.576849
PTPN1	0.336238	0.336304	7.09014	0.068605	0.577306
ARG2	-0.858295	-0.865936	2.31221	0.0687905	0.578198
TMEM147-AS1	0.928127	0.936824	2.1253	0.0688096	0.578198
ZNF804A	-0.373692	-0.373876	5.9419	0.0689372	0.578855
BET1	-0.401316	-0.401656	5.36414	0.0690544	0.579144
C17orf51	-0.395776	-0.396134	5.52035	0.0690704	0.579144
HIST1H2BK	0.551066	0.552976	4.21491	0.0691972	0.579573
IDH1	-0.339745	-0.33982	7.25418	0.0692772	0.579573
ZHX3	0.335442	0.335508	7.0943	0.0693493	0.579573
FBXO48	-1.07326	-1.08526	1.41326	0.0693855	0.579573
KLHL7	-0.412645	-0.413076	4.87612	0.0694255	0.579573
CHFR	0.3934	0.393705	5.48042	0.0694666	0.579573
PPM1K	-0.368442	-0.36866	6.34004	0.0694677	0.579573
AQP11	-1.32126	-1.35256	1.23832	0.0695603	0.579933
BATF3	0.69022	0.692604	2.80691	0.0696337	0.580133
SNORC	-1.62317	-1.6929	1.09411	0.0697204	0.580442
SPAG16	-0.497863	-0.498892	4.15226	0.0698849	0.581399
USP25	-0.370781	-0.370996	5.96282	0.0700038	0.581975
TOR4A	0.356748	0.356881	6.37044	0.0702214	0.58337
TMEM117	0.585652	0.587863	3.46889	0.070511	0.585216
TSNAXIP1	-1.82601	-1.94725	1.24622	0.0705434	0.585216
SHANK2	-1.10912	-1.12569	1.29978	0.0706412	0.585613
F2R	0.349139	0.349238	6.35137	0.0707406	0.58573
KCNQ1OT1	-0.453275	-0.453975	4.51048	0.0707553	0.58573
GMNC	1.04197	1.05652	2.21963	0.0708524	0.585784
CADPS2	-0.418786	-0.419202	5.00641	0.0709069	0.585784
SERP1	-0.32625	-0.326296	8.07164	0.070916	0.585784
ETV6	0.48373	0.484486	4.1263	0.0709945	0.585784
CYREN	0.526745	0.527909	3.73996	0.0710358	0.585784
THAP8	-0.912866	-0.920151	2.16988	0.0711066	0.585784
FBXO32	-0.944287	-0.954944	2.70274	0.0711116	0.585784
KIAA1143	0.393119	0.393414	5.22484	0.0711736	0.585883
AASS	-0.376689	-0.376891	6.19891	0.071351	0.586931
TMEM186	-0.840139	-0.846998	2.59207	0.0716828	0.589247
SPOUT1	0.412653	0.413064	4.94331	0.0719573	0.590403
KLHDC8B	0.680541	0.68366	2.93564	0.0719846	0.590403
SRA1	-0.374338	-0.374623	5.73705	0.072015	0.590403
BEND3	0.771808	0.775333	2.60164	0.0720249	0.590403
ARHGAP18	0.358537	0.358661	6.01867	0.0721915	0.591173
MOSMO	0.464514	0.4653	4.14609	0.0722198	0.591173
ZBTB39	0.691996	0.695174	2.97581	0.0722946	0.591373
TTLL12	0.385892	0.386173	5.53152	0.0724437	0.592179
GNB1L	0.723554	0.726285	2.7301	0.0725604	0.59272
VAMP4	-0.371755	-0.371995	5.7261	0.0726699	0.593059
CHST3	-0.403496	-0.403952	5.44169	0.0727031	0.593059
FOXM1	0.362218	0.362325	5.78047	0.0728291	0.593673
NICN1	0.624866	0.626772	3.27956	0.0729279	0.594066
BGN	3.19763	1.44269e+08	2.41865	0.0730737	0.59484
DTNBP1	0.553335	0.554931	3.39735	0.0731504	0.595051
AKAP6	-1.7105	-1.79937	1.07989	0.0734514	0.597085
MTMR12	0.388332	0.388616	5.29869	0.0735541	0.597506
ARHGAP42	-0.745556	-0.749514	2.8379	0.0737067	0.598331
SHISA2	0.368064	0.368194	5.53716	0.0738302	0.598556
CA5B	0.770578	0.776117	2.56259	0.0738365	0.598556
SZRD1	0.331752	0.331815	7.0744	0.0740344	0.599637
TMEM67	-0.641428	-0.643908	3.6134	0.0740722	0.599637
MSH3	0.447548	0.448156	4.5842	0.0742506	0.600666
POP5	0.5173	0.518176	3.48097	0.0743268	0.600868
FN3K	0.929426	0.942202	3.17427	0.0744363	0.601339
DNAH1	0.763205	0.770372	3.88393	0.0747543	0.602995
FRA10AC1	-0.435646	-0.436321	4.8917	0.0747711	0.602995
CDC14B	0.416769	0.417365	4.83867	0.0747957	0.602995
ZNF738	0.942715	0.948654	1.87345	0.0748756	0.603224
IGIP	-0.525894	-0.527164	4.27155	0.0755251	0.60804
ERN1	-0.43335	-0.434207	4.92547	0.0756712	0.608798
MOGS	-0.342439	-0.342569	6.9416	0.0763724	0.614018
MPDZ	-0.366535	-0.366748	5.89923	0.0765762	0.615234
DIPK1A	-0.418202	-0.418746	4.65901	0.0769351	0.617347
WDR89	-0.581047	-0.583036	3.29994	0.0771327	0.617347
EML2	-0.365155	-0.365359	6.16058	0.0771659	0.617347
EIF2S2P4	-2.16731	-2.35993	0.523855	0.0774036	0.617347
C22orf39	-0.488979	-0.490222	3.98757	0.0774227	0.617347
CDC25A	0.474076	0.474632	3.87241	0.0774332	0.617347
ARFGAP1	-0.342154	-0.342249	7.17056	0.0774336	0.617347
PLPP4	0.689816	0.69271	2.53606	0.0774493	0.617347
HIPK2	0.316629	0.316641	9.48534	0.0774993	0.617347
FBXL17	-0.368629	-0.368832	5.85332	0.0775098	0.617347
BNC2	-0.382264	-0.382536	5.37196	0.0775358	0.617347
ILKAP	0.433927	0.434454	4.42697	0.0775492	0.617347
DNAJC3-DT	-1.37637	-1.40852	0.798993	0.0775601	0.617347
RPS6KA2	0.340755	0.340849	7.47508	0.0776111	0.617347
HIST2H2BE	-1.14328	-1.16373	2.58881	0.0776538	0.617347
PLSCR4	-0.547831	-0.549317	3.74046	0.0776819	0.617347
DCTN3	0.368193	0.368375	5.63834	0.0777387	0.61738
CBX4	-0.371607	-0.371866	5.82282	0.0778148	0.617566
KIAA0825	1.25061	1.2746	1.58878	0.0779333	0.618088
CCDC91	-0.416708	-0.417252	4.95305	0.0781241	0.619183
SETBP1	1.42068	1.49058	2.64283	0.0781935	0.619314
COL10A1	3.20296	1.44269e+08	2.06224	0.0782616	0.619435
FUCA1	0.436107	0.437252	6.70972	0.0786543	0.622123
COL6A2	-0.318715	-0.318721	10.3077	0.0787395	0.622377
AVIL	-1.12881	-1.14788	1.28584	0.0788855	0.623111
TEX30	0.486054	0.48692	3.73341	0.0790194	0.623748
PTPN4	-0.484968	-0.486195	4.02111	0.0791592	0.623812
LTV1	0.397002	0.397314	5.11635	0.0791817	0.623812
PARP16	0.763729	0.767627	2.72146	0.0792191	0.623812
HAGH	0.433465	0.434126	4.70687	0.0792404	0.623812
PATL1	0.356301	0.356473	6.2132	0.0794935	0.625384
CLGN	-1.46848	-1.52378	1.65337	0.0795861	0.625693
FKBP11	-0.363733	-0.363956	6.09445	0.0797047	0.626206
ZMYND8	0.340256	0.340363	6.40657	0.0798974	0.627112
MRPL22	0.426714	0.427291	4.26142	0.0799271	0.627112
GMIP	-0.505986	-0.507063	4.06853	0.0803515	0.63002
TRMT44	-0.762744	-0.767017	2.87696	0.0806152	0.631666
SUCLG2-AS1	1.06507	1.0791	1.4942	0.080761	0.632094
NPR2	-0.388748	-0.38911	5.46147	0.0807777	0.632094
RIPK2	-0.372823	-0.373082	5.92845	0.0809525	0.633039
CPOX	-0.364115	-0.36432	5.80687	0.081062	0.633472
ZNF385A	-0.605392	-0.608085	3.70503	0.0811803	0.633899
PWAR6	-1.68971	-1.77843	1.09387	0.0812248	0.633899
TGFBR3	0.402621	0.403038	4.63498	0.0814712	0.635399
ZC3HAV1L	0.466288	0.467159	3.91684	0.0815821	0.635842
RANBP6	0.381729	0.381962	5.27006	0.0817903	0.63704
USP12	0.361687	0.36186	5.95101	0.0818715	0.63725
SLC9A9	-0.80695	-0.813779	2.52876	0.0820294	0.638055
CYFIP2	1.80646	1.9611	2.74235	0.0823266	0.639902
TAF1B	0.408689	0.40909	4.71308	0.0823773	0.639902
BCHE	-0.325088	-0.32517	7.86334	0.0824475	0.639902
HCN2	0.721058	0.723953	2.78785	0.0824853	0.639902
GPR160	1.18761	1.21311	1.66337	0.0826796	0.640985
ARID4B	-0.354547	-0.354735	6.10895	0.0827588	0.641176
CEP126	-0.639713	-0.642862	3.0379	0.082879	0.641494
PHLPP2	0.383677	0.383926	5.16972	0.0829093	0.641494
PBX3	0.397512	0.397982	4.88472	0.0830292	0.641599
SNRPGP15	1.38421	1.41193	1.06814	0.083122	0.641599
TOMM5	0.513952	0.51532	3.56207	0.0831968	0.641599
RASSF8-AS1	0.629056	0.631719	3.58185	0.083211	0.641599
TNKS	-0.360134	-0.360285	6.34814	0.0832171	0.641599
ACO1	-0.326401	-0.326464	7.19808	0.0832811	0.641599
SIAH1	0.690565	0.694117	2.90447	0.083306	0.641599
PLEKHG4	-0.352617	-0.352757	5.95737	0.0833832	0.641771
FBXL7	-0.42493	-0.425444	4.47257	0.0836944	0.643744
CDC7	0.474423	0.475143	3.62533	0.0837585	0.643815
ZNF613	-1.20332	-1.22603	1.09818	0.0838444	0.643872
FCF1P2	1.10703	1.12139	1.33253	0.0838758	0.643872
NPM1P29	-1.80947	-1.93059	1.1708	0.0843502	0.64709
DAB2	-0.35257	-0.352712	6.56043	0.084469	0.647502
GLI2	-0.380695	-0.380926	4.96607	0.0845558	0.647502
SEC14L1	0.333397	0.333449	7.23859	0.0845696	0.647502
ATP5F1E	-0.335614	-0.335695	7.00079	0.0846804	0.647536
PIMREG	0.390564	0.390828	4.63134	0.0846846	0.647536
MDM1	0.527884	0.529323	3.42929	0.0850271	0.649025
FBXL15	-0.564113	-0.565727	3.62609	0.0850673	0.649025
FER	-0.377078	-0.377289	5.53056	0.0851459	0.649025
AKAP11	-0.329005	-0.329079	7.192	0.0851802	0.649025
TMEM243	-0.457635	-0.458551	4.32033	0.0852054	0.649025
SLC25A37	-0.32964	-0.329715	6.84606	0.0852115	0.649025
CDC42EP2	-0.368117	-0.368457	5.79377	0.085458	0.65048
ZFP90	0.428088	0.428766	4.53775	0.0855151	0.650492
PSPC1	0.406174	0.406564	4.72257	0.0857634	0.651958
SLC39A10	-0.352155	-0.352292	6.04125	0.0859705	0.653108
TRIM3	0.407473	0.407967	4.72447	0.0860702	0.653443
ZNF546	-1.05769	-1.07011	1.81368	0.0861446	0.653584
UBXN11	-0.647351	-0.649458	3.24902	0.086317	0.654468
TATDN3	0.608795	0.610966	3.33145	0.0864961	0.654718
PCDHGA4	-0.82933	-0.837906	2.80563	0.0865067	0.654718
AHSA2P	0.346657	0.346835	6.33982	0.0865175	0.654718
APBB1	0.361703	0.361931	5.70297	0.0866814	0.655109
NCAPH	0.382564	0.382783	4.81735	0.0867216	0.655109
SDHD	0.393534	0.393806	5.47313	0.0867368	0.655109
HYI	-0.531503	-0.532319	3.6888	0.0868244	0.655348
ZNF91	-0.559386	-0.561435	3.42834	0.0869587	0.655578
ZNF44	0.884709	0.891861	2.0959	0.0870092	0.655578
ZNF501	-1.02493	-1.03822	1.24144	0.0870226	0.655578
IFT43	-0.652366	-0.656014	3.48822	0.0871539	0.656056
OPN3	-0.395618	-0.395976	4.88364	0.0872148	0.656056
KLHL24	0.583626	0.586408	4.30121	0.0872936	0.656056
ZNF805	-0.918142	-0.928038	1.83168	0.0873173	0.656056
LPCAT1	-0.349115	-0.349234	6.23634	0.0873659	0.656056
RELA	0.338409	0.338517	6.55719	0.0874918	0.656233
KLF15	-1.37948	-1.43272	2.63607	0.0875014	0.656233
TXNL4B	0.574921	0.576863	3.2406	0.0877	0.657302
FZD1	0.390863	0.391286	5.02758	0.0878108	0.657711
PANX2	-0.80135	-0.806723	2.19746	0.0878924	0.657902
PIAS2	0.443914	0.444684	4.50101	0.0881252	0.658624
C9orf72	-0.636713	-0.639288	3.40658	0.088158	0.658624
SUGCT	0.493163	0.494433	3.87798	0.0881621	0.658624
MTMR3	-0.356966	-0.357228	5.82753	0.0882135	0.658624
CHMP2A	-0.348238	-0.348411	6.07462	0.0889032	0.66335
TTLL4	0.415271	0.415852	4.46644	0.0889631	0.663375
BANP	-0.448534	-0.44945	4.02346	0.089079	0.663556
RNF145	-0.333712	-0.333799	6.63628	0.0891007	0.663556
CDYL	-0.389509	-0.38998	5.26771	0.0892506	0.664251
SNRPD3	0.348785	0.348933	5.85782	0.0894367	0.665024
RMND1	0.395165	0.39558	5.07665	0.0894679	0.665024
DPY19L2	-0.823657	-0.827973	1.95019	0.0895637	0.665314
MIATNB	-1.30819	-1.34296	1.21127	0.0896743	0.665602
ELL	0.435717	0.436333	4.61287	0.089716	0.665602
B3GALNT2	-0.420475	-0.421201	4.57751	0.0900043	0.666797
GOLPH3L	-0.397622	-0.398082	4.99393	0.0900453	0.666797
MEGF9	-0.438333	-0.438848	4.64528	0.0900477	0.666797
RFT1	0.417761	0.418341	4.45367	0.0901929	0.666999
INHBE	-1.45927	-1.54075	2.43873	0.0902273	0.666999
HSD3BP5	-1.03136	-1.04625	1.28775	0.0902458	0.666999
C2CD5	-0.373075	-0.37333	5.36863	0.090444	0.667724
FAM107B	0.313942	0.313969	7.80005	0.0904577	0.667724
DSG2	-0.333722	-0.333809	6.70227	0.0905601	0.66788
SUFU	-0.441896	-0.442703	4.41204	0.0906884	0.66788
ZNF22	0.41487	0.41544	4.23776	0.0907223	0.66788
FAM214B	0.357497	0.357752	5.69082	0.0907491	0.66788
MAN1A2	-0.337876	-0.337979	6.61975	0.0907638	0.66788
COL1A1	-0.311854	-0.311857	10.6417	0.09089	0.66839
TBP	0.480785	0.481691	4.01476	0.0909517	0.668396
TDRKH	1.48065	1.52873	0.728872	0.0910049	0.668396
TDRP	-0.756758	-0.763925	3.52112	0.0910938	0.668629
ADPRM	-0.73269	-0.737964	2.79066	0.0914779	0.67101
SELENOM	-0.359254	-0.359507	6.0689	0.0915326	0.67101
RTL5	0.501394	0.502769	3.83882	0.0916705	0.671601
SCNM1	0.421313	0.421944	4.38993	0.0920755	0.674147
MYEF2	-0.732851	-0.737722	3.02631	0.0923075	0.675424
RRP1B	0.345921	0.346085	5.91167	0.0927131	0.677968
ERCC6L2	-0.386791	-0.387155	4.95549	0.0928107	0.678134
ZNF415	0.720937	0.72476	2.64457	0.0928515	0.678134
FDXR	0.449111	0.450327	5.13012	0.0931961	0.680227
GCSH	0.809668	0.814977	2.25092	0.0933836	0.681171
FAM177A1	-0.336744	-0.33686	6.34181	0.0934477	0.681215
SFT2D1	0.358629	0.358884	5.49261	0.0936107	0.681979
GLIPR2	0.916739	0.927452	2.27494	0.0937369	0.682065
MRPL21	0.421909	0.422491	4.35623	0.0937388	0.682065
SMPD2	-0.773358	-0.778362	2.41079	0.0939268	0.683009
UQCC2	0.394984	0.395379	4.90086	0.0942191	0.684709
TGFBR1	-0.362186	-0.362446	5.40567	0.0945375	0.686344
KLHL17	0.42422	0.424775	4.48794	0.0945612	0.686344
SORD	0.415775	0.416335	4.49534	0.0947373	0.687197
CEMIP	0.452976	0.453574	3.61925	0.0950306	0.688898
SLC45A3	-0.650111	-0.653023	2.54577	0.0951618	0.689377
PHIP	-0.321072	-0.321137	7.05628	0.0952655	0.689377
KCND1	-1.20227	-1.22727	1.32862	0.0952731	0.689377
OSMR	-0.314838	-0.314874	8.40687	0.0953734	0.689482
ELOB	0.336988	0.3371	6.57535	0.0954052	0.689482
ZCCHC17	0.422871	0.423507	4.32402	0.0955434	0.690056
MIR29B2CHG	-0.558726	-0.561044	3.52662	0.0958385	0.691019
TRIM45	0.744445	0.748807	2.46416	0.0958392	0.691019
ZNF646	0.435622	0.436263	4.34842	0.0958537	0.691019
SMYD3	-0.445468	-0.446203	4.344	0.0960764	0.692199
ANKS1A	-0.368208	-0.36853	5.33348	0.0961512	0.692312
CLUH	0.331596	0.331711	6.43733	0.0963196	0.692778
BMPER	-0.475826	-0.476638	3.62317	0.0963391	0.692778
TMTC1	0.342704	0.342804	6.88478	0.0963932	0.692778
ADCY10P1	-0.844609	-0.851556	1.91006	0.0964627	0.692853
SGK3	-0.673539	-0.676582	2.58506	0.0968243	0.695024
SCAF4	0.387496	0.387755	5.40997	0.0970838	0.695967
C8orf58	0.482644	0.483526	3.6334	0.097161	0.695967
AHR	0.327185	0.327254	7.02591	0.0971618	0.695967
MED18	0.457722	0.458741	3.99968	0.0972106	0.695967
NAT1	0.847031	0.852395	2.13962	0.0972525	0.695967
FGF2	-0.329357	-0.329446	6.8817	0.0973353	0.696135
CDKN3	0.408733	0.409089	4.24659	0.0974302	0.696388
TBC1D32	-0.657375	-0.661582	3.36177	0.0975973	0.696831
SAMD1	0.387147	0.387502	4.94678	0.0976111	0.696831
BCAM	-0.482162	-0.484241	5.28578	0.0977983	0.697661
SENP7	-0.427106	-0.427824	4.21329	0.0978685	0.697661
ANKRD42	-0.527732	-0.529471	3.79859	0.0979059	0.697661
ABCA8	0.366435	0.36676	5.40854	0.0981514	0.698537
PLEKHF2	-0.419877	-0.42047	4.13176	0.0981561	0.698537
PEX10	0.480508	0.481593	3.69897	0.0982075	0.698537
YARS2	-0.384886	-0.385359	4.97353	0.0986713	0.700994
MFSD5	0.377968	0.378322	4.93367	0.0986727	0.700994
CRIM1-DT	0.984184	0.995447	1.81038	0.09874	0.701048
NT5C2	0.386628	0.387014	4.85077	0.0989805	0.702031
TSPAN6	0.436296	0.437061	4.27438	0.0990292	0.702031
SLC25A26	0.462431	0.463526	4.04839	0.0990581	0.702031
DERA	0.361115	0.361327	5.37865	0.0991646	0.702361
TAF11	-0.448196	-0.449099	4.05393	0.0993239	0.702554
TRAM2-AS1	0.653846	0.657171	2.90978	0.0993433	0.702554
ESCO1	-0.423938	-0.424744	4.18301	0.099416	0.702554
MIF-AS1	-1.17004	-1.19442	0.985251	0.0994315	0.702554
UPP1	-0.409153	-0.409613	4.23287	0.0996425	0.70362
SEPSECS	-0.566771	-0.568924	3.56078	0.0998728	0.70395
MRVI1	1.13109	1.15001	0.894143	0.0998824	0.70395
POLD1	0.358207	0.358414	5.09065	0.0999796	0.70395
SH3RF1	0.320794	0.320857	7.08064	0.0999869	0.70395
KDM7A	-0.614252	-0.617958	4.09541	0.0999895	0.70395
TNS4	-1.06798	-1.09077	1.60889	0.100344	0.705358
NTM	0.452753	0.453817	4.1833	0.100345	0.705358
GBGT1	-0.864831	-0.873284	2.31944	0.10037	0.705358
UBE2D1	-0.417508	-0.418097	4.31468	0.100461	0.705576
OPLAH	0.678311	0.682685	2.93389	0.100571	0.705927
DHCR24	-0.308076	-0.308102	7.86833	0.100937	0.70797
STX12	-0.328099	-0.328213	6.49098	0.101099	0.70797
RBBP9	0.414966	0.415429	4.48041	0.101134	0.70797
CREB3L4	1.06464	1.07786	1.31932	0.101235	0.70797
SC5D	-0.34675	-0.346949	5.4975	0.101241	0.70797
ZNF699	-0.742479	-0.746985	2.24268	0.101333	0.70797
RFFL	0.425835	0.426546	4.10146	0.101333	0.70797
TMSB15B	0.99437	1.0085	1.08351	0.101361	0.70797
OTULINL	0.327537	0.327615	6.26437	0.10145	0.70797
UBN2	-0.401154	-0.401742	4.63211	0.101466	0.70797
TTC39B	-0.345399	-0.345646	6.71309	0.101748	0.709515
FKBP15	0.344023	0.34422	5.67961	0.102028	0.71104
RARG	0.35313	0.353426	5.72576	0.102268	0.711462
HECTD4	-0.334383	-0.334515	6.46693	0.102273	0.711462
HMGB1P5	0.704174	0.707569	2.15499	0.102367	0.711462
TCTEX1D4	0.981463	0.994649	1.88865	0.102373	0.711462
BLVRB	-0.364423	-0.364734	5.07335	0.102392	0.711462
WDR19	-0.377508	-0.377901	4.91071	0.102461	0.711521
XRRA1	-0.531025	-0.533087	3.69274	0.102678	0.712605
C19orf54	0.697253	0.700866	3.19751	0.102868	0.713503
CLCN5	0.529935	0.533205	4.96615	0.102947	0.713596
INTU	-0.426052	-0.427088	4.55107	0.103003	0.713596
ARMCX2	-0.329006	-0.329132	6.40089	0.103395	0.715685
GCNA	0.914703	0.930012	2.41709	0.103427	0.715685
ECHDC2	-1.67677	-1.79309	0.969052	0.10352	0.715905
ETFB	-0.406791	-0.407345	4.50653	0.103665	0.716192
ARMH4	1.07475	1.09189	1.53188	0.103683	0.716192
SAMM50	0.36791	0.368171	5.16501	0.103805	0.716607
RAB4B	-0.710285	-0.715131	2.4522	0.10393	0.717049
SLC27A5	-0.97717	-0.988988	1.45492	0.104231	0.718702
KCNS3	0.623444	0.625481	3.18004	0.10434	0.719031
OSGEP	0.418644	0.41935	4.00067	0.104784	0.721671
HCG11	1.13338	1.15814	1.42726	0.105176	0.722778
EEA1	-0.328792	-0.328884	6.7114	0.105197	0.722778
GATA2	0.498394	0.499388	3.80197	0.105199	0.722778
IPMK	-0.488671	-0.489746	3.62004	0.105203	0.722778
AARSD1	1.41571	1.46246	0.796429	0.105254	0.722778
ZKSCAN3	-0.746452	-0.750788	2.43498	0.105432	0.723359
ZNF680	0.905826	0.916376	1.70307	0.105462	0.723359
RUNDC3B	1.34187	1.38083	1.16004	0.105596	0.723861
VPS8	-0.34774	-0.348004	5.75367	0.105662	0.723889
CYBA	-0.318829	-0.318882	7.51204	0.105812	0.72408
PTGR2	0.716628	0.721319	2.43345	0.105897	0.72408
ZNF143	-0.453135	-0.4542	3.77583	0.105947	0.72408
USPL1	-0.407181	-0.407803	4.25572	0.105979	0.72408
SYDE2	0.658747	0.662649	2.77958	0.105999	0.72408
ZNF557	0.651237	0.654556	2.73634	0.106266	0.72535
IFT27	-0.521804	-0.523572	3.64433	0.106309	0.72535
PPIC	-0.377496	-0.377987	4.91566	0.106777	0.728001
CD81	-0.306481	-0.306513	8.37476	0.106822	0.728001
TOX2	0.391261	0.391626	4.43135	0.107148	0.729803
USP21	-0.428198	-0.429014	4.31001	0.107225	0.729905
BANK1	0.942191	0.954278	1.66551	0.107366	0.730438
LINC02001	0.984685	0.996022	1.32154	0.10748	0.730787
ARID1A	-0.316876	-0.316953	6.89813	0.107842	0.732824
ADK	-0.347162	-0.347384	5.46994	0.108176	0.734672
ATG10	0.670987	0.67461	2.6423	0.108345	0.735353
ZXDB	0.403927	0.404578	4.32099	0.108412	0.735353
ARHGAP39	0.80608	0.811636	1.96375	0.108468	0.735353
THAP1	-0.465073	-0.466166	3.63213	0.108528	0.735353
TAF5L	0.361014	0.36131	5.05489	0.10861	0.735485
STX1A	0.406873	0.407373	4.28883	0.109002	0.737711
CD109	0.322192	0.32225	7.05832	0.109066	0.737721
TTF1	0.436911	0.437689	4.08994	0.109159	0.737926
BRIX1	0.375482	0.375831	4.83898	0.109406	0.739167
TMX4	-0.327936	-0.328057	6.56055	0.109845	0.741707
BORCS7	-0.501649	-0.503062	3.95755	0.110336	0.743354
POLR2D	0.367323	0.367682	4.77957	0.110337	0.743354
ZNF621	0.393222	0.393792	4.57209	0.110365	0.743354
SLC27A4	0.346867	0.347097	5.31214	0.110373	0.743354
YJU2	0.496771	0.498033	3.54204	0.110529	0.743354
NOTCH1	-0.32347	-0.323581	6.45622	0.110538	0.743354
RPS23P8	1.60851	1.6836	0.965924	0.110551	0.743354
CSRNP1	-0.373013	-0.373465	5.30375	0.110596	0.743354
MEX3B	-0.950474	-0.961415	1.31311	0.110665	0.743359
MOB2	0.440977	0.441839	3.95299	0.110763	0.743359
POMK	-0.732292	-0.736735	2.30065	0.110787	0.743359
DARS2	0.349394	0.349591	5.271	0.110934	0.743919
RNA5SP283	1.01297	1.02736	0.92622	0.111044	0.744227
PSMD3	0.314126	0.314191	6.90649	0.111199	0.744488
MBNL3	-0.690746	-0.694011	2.25914	0.11121	0.744488
SREK1	-0.321821	-0.321917	6.72512	0.111289	0.744596
ADAT1	0.390361	0.390825	4.6666	0.111381	0.744787
LIMS2	-0.345951	-0.346239	5.75117	0.111803	0.747184
LIPT1	-0.924172	-0.935421	1.32424	0.11194	0.747248
SRI	0.327413	0.327539	6.13638	0.111945	0.747248
ZCCHC2	-0.455235	-0.456168	3.93429	0.11206	0.747248
ZNF300	-0.507274	-0.508683	3.15375	0.112118	0.747248
XYLT2	-0.32701	-0.327173	6.44964	0.112132	0.747248
FAM111A-DT	0.5674	0.569587	3.0657	0.112315	0.747859
CHORDC1	-0.344084	-0.344262	5.70202	0.112386	0.747859
RBPJ	-0.312925	-0.313001	7.33001	0.112467	0.747859
DCAF16	0.347006	0.347244	5.33008	0.112479	0.747859
ZNF358	-0.380586	-0.381076	4.67321	0.11273	0.748523
MCM5	0.339256	0.339351	5.85878	0.11279	0.748523
HOXB7	0.404711	0.405302	4.1689	0.112816	0.748523
MGAT4C	3.19991	1.44269e+08	0.8086	0.112837	0.748523
FBXL19-AS1	0.78942	0.79633	2.27664	0.112898	0.748523
FAT4	-0.324931	-0.325048	6.36984	0.113304	0.750794
TMEM102	0.91717	0.926532	1.67708	0.113508	0.751465
HDAC11	0.881155	0.890263	1.78169	0.113534	0.751465
RRM2	0.312831	0.312866	7.13217	0.114084	0.754316
SAP130	0.348962	0.349217	5.34858	0.114093	0.754316
UBA7	-0.351399	-0.35169	5.31847	0.114438	0.756027
IBTK	-0.31806	-0.31817	6.73282	0.114481	0.756027
PRR3	1.1382	1.16299	1.3643	0.114767	0.757101
FOXP4	0.396453	0.397093	4.66239	0.114773	0.757101
SLITRK5	2.05869	2.37031	2.44184	0.114951	0.75771
UQCRHL	0.795267	0.80149	2.04624	0.114994	0.75771
TENM1	-0.877182	-0.889159	2.15091	0.115078	0.757835
TMPRSS11E	2.69139	1.44269e+08	6.1701	0.115214	0.758304
EFCAB7	0.716584	0.720582	2.66795	0.115337	0.75841
PEAK1	-0.306247	-0.306289	7.49231	0.1155	0.75841
COPRS	0.354641	0.354879	5.0403	0.115514	0.75841
GAR1	0.393138	0.393677	4.237	0.115536	0.75841
HAND2	0.319885	0.319965	6.6461	0.115554	0.75841
SEMA4G	-1.19516	-1.2316	1.8863	0.115657	0.758665
SIDT2	-0.327979	-0.328144	6.33228	0.115829	0.759365
SDCBP2-AS1	0.977304	0.990457	1.43243	0.115918	0.759522
ARMCX4	-0.367933	-0.368258	5.23067	0.116023	0.759791
SIN3A	0.332467	0.332627	5.76541	0.116361	0.761573
P3H2	0.664664	0.669794	3.1466	0.11648	0.761928
LINC00707	0.43754	0.438294	4.29129	0.116583	0.762157
TUBG1	0.339505	0.339672	5.44948	0.116728	0.762157
FOXO4	0.614709	0.617582	3.46986	0.116841	0.762157
FBXO36	0.709651	0.714439	2.41978	0.116845	0.762157
REC8	0.674777	0.679935	3.2691	0.116893	0.762157
RICTOR	-0.338695	-0.33891	6.00512	0.116905	0.762157
HSPA12A	-0.35096	-0.351297	5.52138	0.117252	0.763998
GMNN	-0.376823	-0.377137	4.42258	0.117469	0.764702
TNFSF13B	-1.04066	-1.05759	0.957705	0.117491	0.764702
DUSP19	-0.903172	-0.913894	1.17808	0.117595	0.764953
DYNLRB1	0.319803	0.319903	6.44026	0.11791	0.766068
MT-CYB	0.352086	0.352092	10.5607	0.117914	0.766068
CHD6	0.322113	0.322229	6.55412	0.11799	0.766068
RABEP2	0.388654	0.389104	4.54982	0.118028	0.766068
RPL29P19	1.05477	1.073	1.43057	0.118303	0.767433
RAPH1	0.408335	0.4095	6.50099	0.118657	0.7693
BCAT2	-0.350902	-0.351219	5.44766	0.118834	0.769986
P4HA1	-0.304764	-0.304819	7.76479	0.118894	0.769986
ZNF33A	-0.418885	-0.419493	4.04719	0.119142	0.770945
BCOR	0.368727	0.369038	5.05535	0.11921	0.770945
NDUFAF6	0.628943	0.631989	2.7625	0.119379	0.770945
BBS9	-0.416413	-0.417132	4.21703	0.119419	0.770945
BCL11A	1.03693	1.05144	0.833331	0.119455	0.770945
MRPS24	-0.941877	-0.952929	1.26313	0.119476	0.770945
ERCC6	0.366692	0.366942	5.09725	0.119551	0.770945
ZFP28	0.466661	0.467859	3.81042	0.119599	0.770945
DNAJC21	-0.325002	-0.325135	6.16625	0.119761	0.770945
DNAJC16	-0.345215	-0.345495	5.39595	0.119768	0.770945
GSTM2	-0.536487	-0.538187	3.03757	0.11983	0.770945
CALHM5	-0.345778	-0.346023	5.21842	0.119831	0.770945
FGFR1	-0.329186	-0.329381	5.88649	0.119949	0.77128
PCBP1-AS1	-0.698086	-0.703731	2.74514	0.120199	0.772465
LIG4	-0.358972	-0.35936	5.01917	0.120332	0.772894
ZBTB2	0.384051	0.384551	4.37326	0.120457	0.773119
NUP50	0.317452	0.317544	6.3356	0.120499	0.773119
TMEM45A	-0.366581	-0.36698	5.12452	0.120636	0.773576
ARSE	0.512431	0.513661	3.60949	0.12073	0.773757
CYP51A1	-0.396027	-0.396614	3.93167	0.120936	0.773923
TMEM256	-0.579236	-0.581698	2.7913	0.120941	0.773923
SWT1	-0.709008	-0.714142	2.65319	0.121011	0.773923
E2F1	0.371559	0.371836	4.38379	0.121091	0.773923
ZNF300P1	-0.772745	-0.779365	1.85625	0.121132	0.773923
TMEM106B	-0.31619	-0.316262	7.28831	0.121186	0.773923
NR3C2	0.758809	0.764432	2.25479	0.121219	0.773923
HTRA1	-0.299043	-0.29907	8.22379	0.121447	0.774614
ADAMTSL1	-0.312439	-0.312496	6.71746	0.121459	0.774614
XXYLT1	-0.404613	-0.405304	3.9632	0.121624	0.774922
DHRS4L2	-0.522658	-0.524377	3.17692	0.121639	0.774922
HSD17B1	-0.659597	-0.663806	3.01013	0.121793	0.775478
UQCR10	0.345689	0.345925	5.36252	0.122522	0.779695
SLC37A2	-0.438002	-0.438999	4.02254	0.122686	0.780315
MEX3A	1.14201	1.17305	2.05826	0.122942	0.781524
CROCCP3	0.626948	0.629886	2.85919	0.123183	0.782606
KATNAL1	-0.318077	-0.318159	6.44341	0.123246	0.782606
CCDC18	-0.434727	-0.435421	3.47217	0.123418	0.783006
GPT2	-0.373301	-0.37394	5.4896	0.123499	0.783006
LACC1	-0.361717	-0.362155	5.41793	0.123714	0.783006
TIMELESS	0.336894	0.337023	5.67022	0.123951	0.783006
APBB1IP	-0.373364	-0.373848	4.62023	0.123973	0.783006
CERCAM	-0.304226	-0.304279	7.95866	0.124051	0.783006
C3orf33	-0.98019	-0.996516	2.15532	0.124067	0.783006
DMXL1	-0.327193	-0.327367	6.09562	0.124078	0.783006
ZNF816	-0.900271	-0.911872	1.82343	0.124123	0.783006
DISC1	-0.672954	-0.676685	2.58587	0.124152	0.783006
PDE5A	-0.446205	-0.44688	3.78334	0.124159	0.783006
UFD1	0.34438	0.344585	5.27309	0.124172	0.783006
EPS8L2	0.355513	0.355903	5.08175	0.124177	0.783006
MRPL24	0.348527	0.348759	5.43361	0.12446	0.784141
TCAIM	-0.37641	-0.376976	4.55533	0.124491	0.784141
TSEN2	0.523922	0.525542	3.34	0.124571	0.78422
ABI3	-0.720964	-0.727609	2.51989	0.124734	0.784487
DMXL2	-0.33317	-0.333351	5.66528	0.124747	0.784487
PARL	0.379187	0.379668	4.5141	0.124892	0.784977
NOC4L	0.421153	0.421949	4.02215	0.125025	0.785393
AP1M1	0.303963	0.304016	7.4961	0.12519	0.785484
ABCD1	0.407134	0.407997	3.9957	0.125282	0.785484
WLS	-0.314919	-0.315032	6.60927	0.125335	0.785484
POLG2	-0.531929	-0.533857	3.11365	0.125381	0.785484
CCDC39	-0.501308	-0.50483	5.77051	0.125398	0.785484
TRABD2A	0.388554	0.389156	4.52101	0.125441	0.785484
HEATR5B	-0.331549	-0.331735	5.57989	0.125601	0.786061
TFPT	0.501276	0.503035	3.45534	0.125756	0.786611
DTX2	-0.399269	-0.399959	4.29133	0.126105	0.788372
RBM22	0.349072	0.349394	4.96207	0.126172	0.788372
RHOB	-0.312096	-0.31218	6.62636	0.126245	0.788406
C17orf53	-0.582431	-0.584157	2.59015	0.126479	0.789447
MRPL50	0.408283	0.408891	4.17391	0.126788	0.79049
PHKA2	0.366772	0.367257	4.68775	0.126803	0.79049
EMC3-AS1	0.77892	0.78456	1.71683	0.126848	0.79049
SVIL	0.464163	0.465461	3.53909	0.12708	0.791516
WFS1	-0.322124	-0.3223	5.97569	0.127409	0.793143
BRF1	0.360298	0.360709	4.78294	0.127494	0.793251
MIS18BP1	-0.326093	-0.326221	5.71963	0.127751	0.794227
ZNF706	0.36249	0.362867	4.7567	0.127811	0.794227
SLC44A1	0.301455	0.301499	7.60167	0.127885	0.794227
RAB20	-0.85744	-0.866512	1.42446	0.127977	0.794227
PISD	0.325939	0.326135	6.21149	0.128147	0.794227
NUDT13	0.759003	0.76503	1.58694	0.128153	0.794227
RPL14P1	-0.744966	-0.750849	1.9054	0.128206	0.794227
TST	-0.564535	-0.567534	3.21347	0.128245	0.794227
FGFRL1	0.382827	0.383488	4.44564	0.128261	0.794227
FBXO33	0.342955	0.343243	5.08145	0.128579	0.794917
OTUB2	-0.822045	-0.829559	1.84007	0.128585	0.794917
HDAC3	0.338953	0.339216	5.36865	0.128747	0.794917
ST7	0.356302	0.35672	4.85775	0.128786	0.794917
SELENOH	-0.389805	-0.390438	4.72103	0.128791	0.794917
ZNF528	-0.390614	-0.391279	4.28577	0.1288	0.794917
PRKD2	0.354095	0.354474	5.21793	0.128918	0.794917
DDI2	-0.356805	-0.357109	4.99382	0.128923	0.794917
C6orf132	0.396174	0.396732	4.33749	0.128982	0.794917
TRNT1	0.395909	0.396518	4.46701	0.129332	0.796656
NUP107	-0.331948	-0.332136	5.28814	0.129437	0.796882
IL17D	1.27682	1.31458	1.23367	0.129963	0.799485
TMEM81	1.25266	1.29024	1.23458	0.129996	0.799485
NUDT19	0.364932	0.365369	4.71919	0.130105	0.799735
PHF11	0.37599	0.376465	4.57152	0.130253	0.80007
NUDT14	-1.1119	-1.14291	1.84065	0.130296	0.80007
SELENOI	-0.314702	-0.314812	6.2107	0.130435	0.800504
TXNDC9	0.348329	0.348601	5.01164	0.130596	0.800968
SREBF2-AS1	-1.06706	-1.0882	1.16228	0.130671	0.800968
ISOC1	-0.363541	-0.364074	4.6456	0.130716	0.800968
PIK3C2A	-0.311526	-0.311596	7.19203	0.130878	0.801455
URGCP	-0.34189	-0.342172	5.24447	0.130932	0.801455
RPL7AP6	-0.836779	-0.84609	1.73925	0.13107	0.80163
CLDND1	-0.312484	-0.312587	6.49833	0.131097	0.80163
MYO10	0.315424	0.315525	6.32891	0.131338	0.802317
SMIM19	0.537462	0.539165	3.47932	0.131347	0.802317
LRPAP1	-0.312872	-0.312972	6.91895	0.131446	0.802504
DNAJC30	0.598696	0.601155	2.8205	0.131579	0.80284
ERP29	-0.312833	-0.312958	6.66808	0.131638	0.80284
ZBTB8A	0.64366	0.646302	2.63733	0.131904	0.803658
EAPP	0.394205	0.394961	4.15183	0.131909	0.803658
MRTO4	0.327873	0.328032	5.55779	0.131984	0.803698
XRCC2	0.483922	0.4848	3.17505	0.132433	0.805804
SNRPG	0.351289	0.351561	5.05687	0.132467	0.805804
SLC10A7	-0.474962	-0.476177	3.62473	0.132569	0.805878
CCL26	2.69208	1.44269e+08	3.51269	0.132617	0.805878
HTR7P1	0.812738	0.818181	1.79884	0.132894	0.807144
ATG3	0.321353	0.321511	5.79377	0.133094	0.807938
PDIK1L	-0.761044	-0.768219	2.0434	0.133175	0.808011
DCLRE1B	0.463748	0.464524	3.39559	0.133381	0.808843
RRP36	0.347866	0.348158	4.82195	0.133457	0.808887
CHMP1B	-0.330145	-0.330411	5.60141	0.133595	0.809304
SNRPB2	0.327089	0.327294	5.57665	0.133666	0.809314
MSH6	0.30797	0.308048	6.44719	0.133799	0.809519
HNRNPH2	-0.318777	-0.318909	5.95724	0.133838	0.809519
GCLC	0.354616	0.354921	5.12735	0.134132	0.81048
ZNF180	-0.670183	-0.672972	2.4869	0.13416	0.81048
CLHC1	0.670276	0.674098	2.71683	0.134204	0.81048
HOXA3	-0.617545	-0.620438	2.38334	0.134425	0.811394
ZNF774	-1.65614	-1.77231	0.860379	0.134526	0.811557
PRKCE	-0.403316	-0.404132	4.31982	0.134658	0.811557
MED29	0.331865	0.332112	5.24897	0.13466	0.811557
LRP12	-0.319881	-0.32004	5.80883	0.134766	0.811779
RRP7BP	0.62692	0.630413	2.61432	0.13487	0.811991
SNUPN	0.472115	0.473583	3.48129	0.134959	0.812107
POLR3A	0.328532	0.328719	5.74304	0.135171	0.812967
HEXD	0.5306	0.533125	3.38891	0.135382	0.813817
SLC39A7	-0.312345	-0.312477	6.3709	0.135618	0.81387
ARMCX6	0.423257	0.424266	3.78163	0.135676	0.81387
TEPSIN	0.610063	0.612433	2.7376	0.135753	0.81387
AFDN	-0.30337	-0.303446	6.81509	0.135782	0.81387
ZXDA	0.781666	0.789957	2.17895	0.135805	0.81387
PSMA1	0.360519	0.360943	4.48942	0.135807	0.81387
ZNF23	1.31133	1.36509	1.00883	0.135885	0.813922
MICA	-0.351243	-0.351668	4.81517	0.13608	0.814674
CREB1	-0.326399	-0.326615	5.41781	0.136326	0.815412
ZNF487	0.98172	0.996571	1.12145	0.13635	0.815412
EIF4A3	0.314094	0.314232	5.93316	0.136412	0.815412
NEMP1	0.332279	0.33248	5.08193	0.136799	0.816823
TRAPPC6B	0.341571	0.341839	5.3895	0.13685	0.816823
RPL23AP7	-0.791547	-0.798417	2.02839	0.136901	0.816823
GLB1	-0.312712	-0.312873	6.35153	0.136927	0.816823
ZCCHC14	-0.349794	-0.350162	4.64849	0.137047	0.817122
SH2B2	1.56068	1.65824	0.859283	0.137133	0.817218
RPL39L	-0.929454	-0.944072	1.07073	0.137487	0.81786
RAB40B	0.58627	0.588721	2.67022	0.137516	0.81786
WDR81	0.331329	0.331566	5.27316	0.137523	0.81786
NOM1	0.330118	0.330332	5.4763	0.137569	0.81786
KLF11	0.587133	0.589651	3.27144	0.137589	0.81786
TSC22D3	-0.305585	-0.305659	6.6389	0.137737	0.818322
CKMT2-AS1	0.715071	0.721407	2.63044	0.137907	0.818757
CUTALP	-0.445142	-0.446314	4.15409	0.138158	0.818757
C4orf48	-0.431015	-0.431931	4.08661	0.138158	0.818757
SLC29A1	0.406958	0.407581	3.86403	0.138205	0.818757
RBM12	0.307257	0.307349	6.44983	0.138215	0.818757
NSFL1C	0.310607	0.310721	6.16001	0.138292	0.818757
ZSCAN32	0.501247	0.503167	3.1635	0.138299	0.818757
FAM120AOS	0.358751	0.35926	4.5242	0.138716	0.818813
NME7	-0.385094	-0.385661	4.12841	0.138753	0.818813
ARID4A	-0.357772	-0.35822	4.67749	0.138805	0.818813
BRI3BP	0.344338	0.344602	4.8153	0.138808	0.818813
EIF4BP6	0.773348	0.781254	1.79814	0.13889	0.818813
NOCT	0.42558	0.426541	3.67802	0.138929	0.818813
ITGA2	-0.313598	-0.313692	6.13332	0.138986	0.818813
SERAC1	0.415844	0.416589	4.63979	0.138993	0.818813
TRPV3	-2.86914	-1.44269e+08	0.844576	0.139038	0.818813
ITGB3	-0.694147	-0.698266	2.04832	0.139066	0.818813
NSMF	0.311937	0.312077	6.65703	0.139077	0.818813
CCDC36	0.4787	0.479984	3.15091	0.139227	0.819286
SACS	-0.297509	-0.297535	8.05841	0.139688	0.821178
HSDL2	-0.321772	-0.321968	5.75487	0.139691	0.821178
RNASEH1-AS1	0.672969	0.676103	2.17445	0.139759	0.821178
DNAJC10	-0.293274	-0.293308	8.21818	0.139874	0.821442
DUSP18	-0.659678	-0.663439	2.24343	0.140028	0.821923
TAP1	-0.351422	-0.351964	5.97559	0.14029	0.821923
TMEM199	0.623501	0.626663	2.63012	0.140352	0.821923
[truncated: 9,723 more rows]

## Sheet: ARID1A_KO_clone11_vs_WT_KRAS
Gene	logFC	unshrunk.logFC	logCPM	PValue	FDR
SULF1	3.50534	3.50703	7.72561	9.21168e-44	1.10181e-39
ALDH1A1	3.07382	3.07526	7.74158	2.73486e-41	1.63558e-37
IGFBP5	4.52065	4.53837	5.6778	8.35759e-30	3.33217e-26
MYO18B	7.29672	7.42938	4.02452	2.14344e-28	6.40944e-25
POSTN	4.90189	4.92867	4.02941	1.14796e-23	2.52392e-20
TERT	1.1029	1.10295	10.1059	1.26608e-23	2.52392e-20
SERPING1	1.43755	1.43795	7.02762	3.90634e-23	6.67483e-20
PLAT	0.885694	0.885707	10.8651	2.69908e-21	4.03546e-18
IGFBP6	1.67003	1.67075	6.82248	5.34535e-21	7.10397e-18
ERRFI1	1.24927	1.24943	7.442	9.11531e-21	1.09028e-17
TAGLN	1.1223	1.12249	8.04125	5.10671e-20	5.47473e-17
ADARB1	-2.78357	-2.79	5.35646	5.55295e-20	5.47473e-17
SYNPO2	1.28561	1.28583	7.08665	5.95029e-20	5.47473e-17
CXCL8	-1.17784	-1.17798	7.0924	1.90648e-19	1.62882e-16
VCAN	1.48879	1.48959	7.6335	5.94007e-19	4.73661e-16
NAA16	0.839639	0.839662	10.28	2.33468e-18	1.69994e-15
ITPR1	1.21899	1.21919	6.92823	2.4161e-18	1.69994e-15
MAGEA3	-7.71031	-8.18	2.89051	5.29596e-18	3.51917e-15
CD248	1.11874	1.11893	7.73424	1.15801e-17	7.28998e-15
TGM2	0.844057	0.844116	9.41707	1.26988e-17	7.59451e-15
CXCL5	-1.25529	-1.25552	6.84158	1.07166e-16	6.10386e-14
BEX1	-2.92224	-2.9343	5.37674	1.59089e-16	8.46077e-14
NRK	-6.17189	-6.42363	3.55319	1.62694e-16	8.46077e-14
PTX3	-1.82721	-1.83013	7.04301	3.05849e-16	1.51527e-13
NES	2.37361	2.38111	5.50056	3.16711e-16	1.51527e-13
MMP1	-2.17604	-2.1847	8.46911	5.40224e-16	2.48524e-13
PPIF	-0.903174	-0.903257	7.82031	1.14062e-15	5.05295e-13
NPTX1	1.54268	1.54579	9.28176	2.96394e-15	1.26613e-12
AKAP12	0.740648	0.740675	9.8944	1.71352e-14	7.0674e-12
PKP2	-1.6977	-1.69866	5.34842	2.25626e-14	8.99572e-12
COL1A1	0.792078	0.792114	11.115	1.10029e-13	4.24536e-11
PPP1R14A	2.26017	2.26468	4.56257	9.30105e-13	3.47656e-10
TIMP1	0.791084	0.79113	8.50244	1.19329e-12	4.32512e-10
SERPINE1	-0.538486	-0.538488	13.85	2.51593e-12	8.8509e-10
ID1	-1.5367	-1.53903	5.39996	8.18533e-12	2.79728e-09
CSF1	0.897673	0.897805	6.86305	1.10585e-11	3.67418e-09
OAS3	-1.77165	-1.77359	4.22482	1.18445e-11	3.82898e-09
IFI6	-0.819375	-0.81945	7.34375	1.70551e-11	5.35977e-09
FAM133A	-2.88961	-2.90164	3.37258	1.74761e-11	5.35977e-09
TOP2A	-1.01943	-1.02004	7.83784	1.88514e-11	5.63703e-09
QSOX1	-0.67619	-0.676206	9.95827	1.94311e-11	5.66867e-09
APCDD1L	-3.79807	-3.84439	3.08986	2.60882e-11	7.42954e-09
EGR1	0.811337	0.811427	7.39968	2.83842e-11	7.89544e-09
LTBP3	0.898231	0.898385	7.40896	2.98375e-11	8.11105e-09
AXL	-0.653336	-0.653363	9.7631	3.83396e-11	1.01907e-08
LIF	1.15366	1.15444	5.99545	5.28189e-11	1.37341e-08
DUSP5	-0.810081	-0.810248	7.3226	7.4455e-11	1.8948e-08
GRIA3	0.886183	0.886349	6.50168	1.06544e-10	2.65494e-08
PAGE1	-4.27804	-4.40459	4.27912	1.09896e-10	2.68259e-08
LMCD1-AS1	4.09427	4.14134	1.91158	1.39167e-10	3.32915e-08
FRG1BP	-1.63128	-1.63324	4.16994	3.25648e-10	7.6374e-08
MAPK10	-3.11026	-3.1272	2.74916	4.98845e-10	1.14744e-07
HAS2	-1.16679	-1.16808	6.14946	5.26914e-10	1.18914e-07
COL6A3	0.569237	0.569246	11.853	5.72402e-10	1.26787e-07
THSD4	1.07166	1.07234	5.81317	6.15054e-10	1.33758e-07
TGFBI	0.538491	0.538498	11.9594	6.30066e-10	1.34575e-07
MGMT	-7.41902	-1.44269e+08	2.11092	8.05503e-10	1.69029e-07
COL3A1	0.621956	0.621979	9.77991	1.34431e-09	2.77229e-07
CREB5	1.57466	1.57616	4.21709	1.55742e-09	3.15733e-07
COL16A1	1.49455	1.49642	4.66469	2.92218e-09	5.80168e-07
SSTR1	0.726776	0.726878	7.09033	2.95881e-09	5.80168e-07
C1orf115	1.88705	1.89054	3.89595	3.85086e-09	7.42905e-07
MYOM2	-2.40134	-2.41035	2.64864	5.18951e-09	9.85266e-07
FN1	0.493509	0.49351	14.3481	7.53524e-09	1.40827e-06
C1S	1.58651	1.58811	4.37261	9.44344e-09	1.73774e-06
FUCA1	0.760468	0.760575	6.90625	1.07852e-08	1.95457e-06
WNT5A	0.548917	0.54893	10.7484	1.58894e-08	2.83662e-06
BIRC3	-1.35837	-1.35979	4.63804	1.84113e-08	3.22749e-06
COL1A2	0.571006	0.571016	11.0599	1.86186e-08	3.22749e-06
MYEF2	-2.78263	-2.80321	2.60384	2.86051e-08	4.8878e-06
RPS6KA3	-0.819617	-0.819947	6.31163	3.42044e-08	5.76224e-06
FBLN2	-2.1119	-2.11862	2.87383	4.23174e-08	7.02998e-06
IL7R	-2.31562	-2.33334	3.74752	4.48309e-08	7.34552e-06
NMNAT2	1.61024	1.61584	4.87801	6.34244e-08	1.02516e-05
KCNJ8	-2.49398	-2.51152	2.72775	7.76452e-08	1.23829e-05
MKI67	-0.834056	-0.834438	7.81407	9.5388e-08	1.48858e-05
UBXN2B	1.51192	1.51413	3.77524	9.58286e-08	1.48858e-05
RNF207	1.46569	1.46916	4.14949	1.06235e-07	1.62014e-05
NRP1	0.679667	0.679818	8.0671	1.07007e-07	1.62014e-05
EBF2	-1.35015	-1.35254	4.52292	1.30546e-07	1.95182e-05
OLAH	0.841141	0.841466	5.74493	1.49714e-07	2.21077e-05
CNN1	1.97877	1.98782	3.3809	1.57915e-07	2.30344e-05
IGFBP3	3.9608	4.12547	4.37204	1.91253e-07	2.75612e-05
PLAU	1.1461	1.14777	4.96135	2.06527e-07	2.93046e-05
CNTN1	-5.47061	-5.93308	1.29217	2.08251e-07	2.93046e-05
FBXL13	-4.20156	-4.3675	1.50785	2.44798e-07	3.36813e-05
SQSTM1	-0.606888	-0.606947	7.9435	2.44985e-07	3.36813e-05
THBS1	0.528562	0.528595	10.4944	2.59836e-07	3.5317e-05
RELN	-1.80884	-1.81558	3.65734	2.65691e-07	3.57071e-05
G0S2	2.61886	2.65734	3.57018	2.68692e-07	3.57091e-05
FAM238B	2.50227	2.51806	2.1601	2.84056e-07	3.73362e-05
CDH13	-1.00929	-1.01009	5.05021	3.1764e-07	4.12967e-05
FTL	-0.519454	-0.519464	10.386	3.22145e-07	4.1432e-05
MYEOV	1.72692	1.73596	4.46273	3.45703e-07	4.39889e-05
ACSL1	0.682945	0.683078	6.9213	4.38159e-07	5.51665e-05
GABBR2	1.51816	1.52588	5.45871	4.90091e-07	6.08452e-05
NR3C2	-4.15736	-4.32298	1.79136	4.93435e-07	6.08452e-05
DHRS3	2.20762	2.22171	2.89519	5.55172e-07	6.76661e-05
RNU6-1	0.837482	0.837887	5.86695	5.60065e-07	6.76661e-05
PCDH7	-1.08443	-1.08569	5.48856	5.66087e-07	6.77097e-05
ADAMTS1	-0.533931	-0.533962	8.85413	5.94153e-07	7.0363e-05
NTM	1.12515	1.12644	4.51634	7.36508e-07	8.63664e-05
SOCS2	1.31004	1.31224	4.00043	7.51866e-07	8.73114e-05
NSD2	-0.656142	-0.656341	7.75459	7.92402e-07	9.11339e-05
ZNF804A	-0.893813	-0.894367	5.77582	8.86504e-07	0.000100985
BTK	1.71651	1.72088	3.00826	9.08132e-07	0.000102473
CDK1	-1.40109	-1.4061	5.35551	9.61141e-07	0.000107441
GAS2L3	-1.21839	-1.22084	5.07138	9.83765e-07	0.000108952
MN1	1.88984	1.91012	4.99354	1.28918e-06	0.000141467
SLC6A15	-2.21283	-2.22836	2.81446	1.33093e-06	0.000144721
HHIP	1.04186	1.04414	7.03408	1.3922e-06	0.000150019
ITGA10	1.26492	1.26815	5.08801	1.42497e-06	0.000152179
PCLAF	-2.66704	-2.72462	4.11265	1.76354e-06	0.00018667
MYH10	0.880521	0.881289	5.6466	2.09117e-06	0.000218418
LIPC	-3.7358	-3.85934	1.24294	2.1e-06	0.000218418
PAGE3	-3.596	-3.66727	1.73218	2.27768e-06	0.000234856
RSPO4	0.728476	0.72862	6.20337	2.39879e-06	0.000245231
ANLN	-0.710204	-0.710738	7.93565	2.66944e-06	0.000270586
STX3	-1.01033	-1.01131	4.77576	3.60741e-06	0.00036259
NTN4	0.507686	0.507736	8.88802	4.19325e-06	0.000417962
CIT	-1.16277	-1.16632	5.5394	4.42666e-06	0.000437581
CD4	0.838317	0.838701	5.38693	4.47857e-06	0.000439083
ETV4	-0.843567	-0.844145	5.36167	5.08782e-06	0.000494759
MAGEC2	-0.989016	-0.990314	4.71827	5.72955e-06	0.000552671
PRC1	-0.903435	-0.90513	6.60332	5.83636e-06	0.00055847
FAP	0.729166	0.729471	6.53606	6.1723e-06	0.000584108
LMOD1	2.03802	2.05255	2.75311	6.23571e-06	0.000584108
NRCAM	0.640996	0.641171	6.49405	6.29684e-06	0.000584108
SLCO3A1	3.36742	3.46508	1.97664	6.29964e-06	0.000584108
MYLK	-0.946912	-0.948108	5.15557	6.86414e-06	0.000624804
PTPRE	1.52998	1.53353	3.02478	6.89016e-06	0.000624804
ZNF185	-1.6111	-1.6161	3.23669	6.89525e-06	0.000624804
MYO18A	1.45369	1.45796	3.78866	7.1242e-06	0.000640696
MAGEA1	-4.67803	-5.13377	1.4152	7.18931e-06	0.000641727
BDKRB2	6.38103	1.44269e+08	0.36486	7.26773e-06	0.000643921
GGT5	1.46057	1.46704	4.62426	7.62184e-06	0.00067033
ADAMTS14	2.3381	2.35596	1.99726	9.03229e-06	0.000788578
GHR	3.07448	3.1432	1.39593	1.00578e-05	0.000871745
LINC00520	-3.75864	-3.88234	0.681078	1.01588e-05	0.000874169
VSIR	0.78509	0.785512	5.52237	1.075e-05	0.00091763
AHNAK2	-1.23187	-1.23456	4.38982	1.08173e-05	0.00091763
PDP1	0.707807	0.708065	6.14011	1.09423e-05	0.000921696
WAS	-4.78661	-5.24358	0.680123	1.10458e-05	0.000923906
NRXN2	-2.37391	-2.39522	1.71479	1.69196e-05	0.00140539
LINC00511	1.7749	1.78161	2.43762	1.76565e-05	0.00145584
ECHDC2	1.70631	1.71288	2.5175	1.77704e-05	0.00145584
TM4SF1	-0.512383	-0.512433	8.19874	1.82824e-05	0.00148759
CCND2	0.759891	0.760159	5.46554	1.90582e-05	0.00154024
IFI44L	-0.990953	-0.991646	4.14972	2.07252e-05	0.00166372
KIF26B	2.72106	2.7792	2.06884	2.14681e-05	0.00171187
DNAJB4	-0.481719	-0.481749	8.84969	2.18723e-05	0.00173255
SH2D5	-1.75339	-1.76642	3.47596	2.37948e-05	0.0018622
SLC39A8	-0.959332	-0.960428	4.5704	2.38205e-05	0.0018622
GALNT5	0.521136	0.521212	8.08034	2.43914e-05	0.00189445
CCDC39	0.635818	0.635976	5.96621	2.71547e-05	0.00209546
KNL1	-1.26038	-1.26714	5.57059	2.92748e-05	0.00224459
KHDRBS2	1.53691	1.5437	3.27046	3.10332e-05	0.00236426
TP53I3	1.02006	1.0221	4.50127	3.48544e-05	0.00263857
CDH10	-2.06535	-2.07857	2.08309	3.56976e-05	0.0026854
WWC1	-2.13639	-2.16014	2.12499	3.72361e-05	0.00277563
RBM24	-0.96967	-0.971162	4.54509	3.73611e-05	0.00277563
FLNA	0.435409	0.435415	11.6983	3.94688e-05	0.00291411
CST3	-0.521482	-0.521502	9.08312	3.99048e-05	0.00292823
YOD1	2.4288	2.46626	2.36354	4.03091e-05	0.00293986
RRM2	-0.96993	-0.972607	6.81485	4.29048e-05	0.00311021
DKK1	-0.997751	-0.999874	4.67878	4.36774e-05	0.00314714
PIK3R1	0.741062	0.741587	5.68692	4.82979e-05	0.00345923
HMGB2	-0.764437	-0.765379	6.02261	5.58441e-05	0.0039759
GEM	-0.640943	-0.641147	5.87983	6.04074e-05	0.00426711
PALLD	0.450739	0.450761	9.33656	6.06479e-05	0.00426711
FLNB	0.462866	0.462884	9.13367	6.11799e-05	0.00427937
CPE	-0.933901	-0.934805	4.19517	6.30544e-05	0.00438485
UBE2C	-1.68813	-1.70935	4.65722	6.56994e-05	0.00454237
LDLRAP1	-0.771643	-0.772228	5.17768	6.79478e-05	0.00467083
TNFRSF11B	5.58055	1.44269e+08	1.97874	6.96909e-05	0.00476327
PTPRB	2.80893	2.87583	1.15132	7.27309e-05	0.00494281
FOXL2	2.4805	2.52169	1.56952	7.33498e-05	0.0049567
H1FX	-0.635131	-0.635456	6.21833	7.44931e-05	0.00500569
COL7A1	0.620324	0.620456	6.86267	7.49762e-05	0.00501
BUB1B	-1.36337	-1.37335	4.76628	7.77982e-05	0.00516969
LCE2A	-0.814269	-0.815266	6.04119	8.04161e-05	0.00531412
PCDHB7	1.82224	1.83304	2.32544	8.1969e-05	0.00538699
MAPK8	-0.735738	-0.73635	5.51286	8.26086e-05	0.00539935
LAPTM4B	-0.728648	-0.729167	5.59373	8.88127e-05	0.00577331
SLC4A3	2.15016	2.17878	2.09228	8.957e-05	0.00578565
CEMIP	1.37083	1.3815	6.24107	8.997e-05	0.00578565
MME	-0.835095	-0.836338	5.09674	9.39188e-05	0.00600729
C1R	0.896669	0.898033	4.45998	9.55418e-05	0.00607859
SEC14L2	0.983399	0.985557	4.36803	9.67945e-05	0.00612571
GRAMD1B	-0.82396	-0.824659	5.14888	0.00010012	0.00630282
SEMA3B	-1.91298	-1.92498	2.03917	0.000102075	0.00639223
MTTP	-0.525112	-0.525169	7.1865	0.000103105	0.00642312
KLHL1	-2.27868	-2.30308	1.53366	0.00010517	0.00651316
NOG	0.9087	0.909857	4.77909	0.000105639	0.00651316
PSD3	0.58244	0.582574	6.46913	0.00011368	0.00697295
AREG	1.21283	1.21516	3.25914	0.000128488	0.00784104
TRIM9	-2.81879	-2.87746	0.505108	0.000134275	0.00815262
NEDD4	-0.504145	-0.504231	7.59262	0.000139563	0.00839871
FZD1	0.783861	0.784479	5.10981	0.000139733	0.00839871
CENPA	-1.99333	-2.0251	3.28103	0.00014436	0.00863345
CDCA2	-1.54676	-1.56136	4.57938	0.000147441	0.00877384
IL11	-0.695714	-0.696059	5.32342	0.000151335	0.00896096
RTN1	-2.18477	-2.2382	3.66318	0.000160177	0.00943781
IQGAP3	-0.923115	-0.925974	5.94345	0.000164706	0.00965707
CDH11	0.507817	0.507884	7.02853	0.000177454	0.0103538
OSBPL3	0.661816	0.662189	5.79818	0.000186799	0.0108462
NRIP3	-0.539862	-0.54001	6.68023	0.000192954	0.0111494
MAP2K3	-0.582993	-0.583214	6.22986	0.000199826	0.011491
FBXO44	-2.50195	-2.54716	1.37464	0.000206916	0.0118417
LMO4	-0.565321	-0.565496	6.36061	0.000210322	0.0119793
NUPR1	0.732601	0.732953	5.22431	0.000221562	0.0124858
ABCA6	3.57678	3.81262	0.975913	0.000222148	0.0124858
GPX3	-0.859831	-0.860809	4.16496	0.000222346	0.0124858
RELB	-0.588205	-0.588354	6.25179	0.000229347	0.0128188
SOAT1	-0.605467	-0.605781	6.11353	0.000232062	0.0129102
CLDN12	-0.667532	-0.667871	5.7674	0.000233255	0.0129165
CYR61	-0.431416	-0.431432	9.83194	0.000245872	0.0135524
OSR1	1.0327	1.03603	4.64718	0.000249348	0.013681
ELFN2	3.04914	3.16715	0.985351	0.000281584	0.0153791
CEP55	-1.13066	-1.13697	5.51465	0.000304339	0.016494
GGH	-0.601367	-0.601682	6.53328	0.000304755	0.016494
FOS	3.31036	3.46894	0.971732	0.000306304	0.0165032
JHY	3.73425	3.97209	0.634553	0.000309417	0.0165223
CYP1B1	1.53949	1.5509	3.78738	0.000309421	0.0165223
NPC1	-0.511442	-0.511522	7.07366	0.000334389	0.0177761
QPCT	-2.22395	-2.2481	1.23151	0.000336473	0.0178078
PLAUR	-0.524448	-0.524557	6.94565	0.000346422	0.0182438
TRIP13	-1.00301	-1.0065	4.98198	0.000347762	0.0182438
CD33	0.694447	0.694877	5.11586	0.000375215	0.019598
SRSF6	0.492078	0.492179	7.51276	0.000392768	0.020281
SETBP1	1.23531	1.23918	2.82386	0.000395168	0.020281
FOSL1	-0.476639	-0.476721	7.85579	0.000395301	0.020281
BDKRB1	3.46896	3.70329	0.598866	0.000395565	0.020281
LTBP2	0.624713	0.625103	6.1713	0.000396769	0.020281
LRRC15	-1.94525	-1.96477	1.68098	0.000402757	0.0204995
WARS	0.502795	0.502851	7.47726	0.000407485	0.0206522
AR	-0.872357	-0.87397	4.4039	0.000413755	0.0208815
ZNF37BP	0.9967	0.99914	4.2155	0.000420764	0.021146
MEIS1	0.618522	0.618905	5.83102	0.00042685	0.0213621
OPHN1	-0.891978	-0.893524	4.57129	0.000444439	0.0221497
AURKA	-1.06465	-1.06913	5.28407	0.000468467	0.0232504
SLITRK5	-3.35076	-3.58262	1.9298	0.000473581	0.0233482
SPOCK1	1.195	1.19857	3.03089	0.000474343	0.0233482
HSPA2	0.834951	0.836368	4.67584	0.000485152	0.0237824
KIF21A	-0.699006	-0.699446	5.00777	0.000487376	0.0237939
CLSPN	-1.76096	-1.79088	4.82855	0.000498369	0.0242317
PRRX1	0.567149	0.567456	6.35543	0.000500702	0.0242465
RCAN1	0.49321	0.493313	7.16489	0.000514378	0.0248084
CRISP3	0.553622	0.553786	6.30017	0.000519595	0.0249494
KLF10	0.714101	0.715032	5.23659	0.000521474	0.0249494
CTSF	0.894799	0.896605	4.10589	0.000526083	0.0250697
PTPRN2	-5.57794	-1.44269e+08	0.49487	0.000536696	0.0254739
CYFIP2	1.11185	1.11425	3.05391	0.000543466	0.0256933
RAD51AP1	-1.87214	-1.90303	3.42516	0.000551019	0.0259288
EBF4	-2.65489	-2.72037	0.693656	0.000553459	0.0259288
NRXN3	-0.789957	-0.790698	4.31901	0.000556772	0.0259288
LDHA	0.413584	0.413606	10.3255	0.000557118	0.0259288
LAMA5	0.567193	0.567313	6.26968	0.000564931	0.0261904
KIF20A	-1.40948	-1.42454	5.14139	0.000567803	0.0262219
FKBP11	-0.573374	-0.573583	5.9918	0.000569995	0.0262219
TIGD5	-1.02036	-1.02307	3.71179	0.000585724	0.0268423
MFAP4	1.45224	1.45869	2.38688	0.000595855	0.0272024
ASAP3	1.20377	1.20772	3.03304	0.000609283	0.0277096
ARHGEF28	-0.545197	-0.54538	6.74237	0.000611799	0.0277187
DTL	-1.73653	-1.76232	4.63846	0.000618996	0.0279389
PISD	0.557589	0.557767	6.26588	0.000634743	0.028382
NPC2	-0.613489	-0.613811	5.71982	0.000634781	0.028382
PDZD7	1.00534	1.00689	3.33381	0.00063593	0.028382
RAP1GAP2	-0.484301	-0.484429	7.46502	0.000660517	0.0291413
NEDD9	0.758407	0.759908	5.58006	0.000661101	0.0291413
SPAG5	-1.06684	-1.07303	5.22506	0.000662587	0.0291413
DEPDC1	-0.964845	-0.968718	5.48093	0.000662689	0.0291413
SESTD1	-0.589464	-0.589794	5.88668	0.000675104	0.0295785
MARCKSL1	2.2983	2.36063	2.4206	0.000708888	0.0309453
CDT1	-1.8529	-1.88915	4.16645	0.000713735	0.0310436
IRX2	-1.03418	-1.03718	3.69115	0.000743578	0.0321875
FAM198B	0.815542	0.81654	4.09654	0.000745418	0.0321875
PIK3CD	-0.544887	-0.54514	6.30757	0.000756057	0.0325295
ETS1	-0.497393	-0.497522	7.17661	0.000761381	0.0326411
QPRT	-1.14405	-1.14848	3.13364	0.000773481	0.0330414
UBE2S	-0.527038	-0.527256	7.01948	0.000797373	0.0339409
FPR1	1.07426	1.07716	3.33607	0.000802034	0.0340182
MAP3K7CL	1.24449	1.25346	3.71757	0.000805313	0.0340366
RPS6KA6	-1.67913	-1.69918	2.25227	0.000813573	0.0342646
PKIA	-0.826611	-0.827919	4.72473	0.000824397	0.0345987
KIRREL3	-0.80373	-0.805621	4.93434	0.000828277	0.03464
BUB1	-0.941079	-0.945054	5.46	0.000859848	0.035835
PTTG1	-0.734908	-0.736344	5.58859	0.00086856	0.0360724
FHL1	-0.92158	-0.92342	3.83277	0.000878284	0.03635
FKBP7	-0.653674	-0.654046	5.22421	0.000882021	0.0363788
NCAPG	-0.865157	-0.868221	5.75278	0.000888182	0.0364707
ZNF883	-1.6173	-1.63512	2.91442	0.000890347	0.0364707
ARNTL2	-0.665393	-0.666005	5.29489	0.000897741	0.0366481
TNFRSF19	0.844192	0.845355	4.31084	0.000999292	0.0406549
TK1	-0.761662	-0.763797	6.20691	0.00102416	0.0415254
SLC22A17	1.56569	1.57597	2.1405	0.00104217	0.0419039
GLIPR1	0.534974	0.535202	7.04837	0.00104228	0.0419039
POPDC3	-0.737592	-0.738555	4.64836	0.00104401	0.0419039
KIF2C	-1.07104	-1.07782	5.25729	0.0010688	0.0427558
SIM2	-0.494604	-0.494718	7.04185	0.00107795	0.0429778
MRTFB	0.811976	0.813424	4.36988	0.0011039	0.0438661
HBEGF	-0.685428	-0.686088	4.84431	0.00112144	0.0444158
ARRB1	-1.85545	-1.87452	1.46876	0.00114662	0.0452631
ANGPTL2	2.80148	2.89425	0.598456	0.00116855	0.0459772
MFSD6	-0.641032	-0.641429	5.24876	0.00117334	0.0460141
NPY2R	3.22279	3.45321	0.670801	0.0011861	0.0463625
SPATA18	0.962889	0.964627	3.62344	0.00120782	0.0470578
RGS10	-0.640959	-0.64139	5.16409	0.00122091	0.0473846
GNL3L	0.809433	0.810707	4.33457	0.00122413	0.0473846
RFX8	1.37895	1.39078	3.53843	0.0012468	0.0479754
NEK2	-1.26748	-1.27831	4.2225	0.00125051	0.0479754
KITLG	0.626481	0.626997	5.39361	0.00125143	0.0479754
CTXN1	2.25328	2.32514	2.03969	0.00125883	0.0481049
E2F7	-0.561118	-0.561487	6.22852	0.00127373	0.0485195
SH3RF3	0.847387	0.848569	4.19304	0.0012821	0.048683
OCIAD2	-0.849474	-0.850832	4.02999	0.0013316	0.0504029
CENPF	-0.527648	-0.528043	7.27254	0.00135873	0.0512676
FBLN5	0.597776	0.598161	5.41914	0.00138875	0.0522353
ZNF688	-1.28439	-1.29123	2.8105	0.00141537	0.0530697
TTC39B	0.484244	0.484331	6.78305	0.00143418	0.0536068
LINC01060	-1.31082	-1.31687	2.58458	0.00145214	0.0541093
BRI3	-0.47268	-0.472779	7.10343	0.00148399	0.0550891
AFAP1L1	-0.798889	-0.800027	4.32099	0.00148765	0.0550891
GPR160	-2.20965	-2.25273	1.33168	0.00149643	0.0552432
MAGEB6	-1.56963	-1.57751	1.84522	0.00150123	0.0552501
RORA	1.0874	1.09188	3.371	0.00153682	0.0563863
RCCD1	0.862363	0.864834	4.27546	0.00155114	0.0567374
PBK	-1.15283	-1.15981	5.02709	0.00156541	0.0570412
WNT5A-AS1	0.709142	0.710128	4.98236	0.00156898	0.0570412
EPB41L3	-0.458542	-0.458648	7.38415	0.00158362	0.057294
IRF7	-0.734841	-0.735536	4.11331	0.00158837	0.057294
BCYRN1	0.492398	0.492519	7.41577	0.0015903	0.057294
FOXQ1	1.80342	1.8392	2.53604	0.00161355	0.0578163
CRISPLD2	0.445286	0.445341	7.59745	0.00161447	0.0578163
PHF1	-0.625147	-0.625538	5.22508	0.00162723	0.0580994
SLC4A4	-0.598523	-0.598922	5.59833	0.00163703	0.0582755
GJB5	-1.58087	-1.59175	1.57332	0.00167257	0.0593637
MAP3K21	-1.12694	-1.1312	3.12221	0.00169561	0.0597203
PRUNE2	-0.968105	-0.970603	3.37251	0.00169816	0.0597203
CBR4	0.829483	0.831114	4.09087	0.00169946	0.0597203
ZNF669	-2.61973	-2.7103	0.864142	0.00170405	0.0597203
MYO7B	-2.17348	-2.21237	1.50534	0.00170758	0.0597203
ACP7	-2.22585	-2.27376	1.13708	0.0017359	0.0605338
DVL2	-0.600394	-0.600867	5.39683	0.00174735	0.0607561
NFKB2	-0.540795	-0.540959	6.40652	0.00176408	0.06116
ARHGDIB	-0.795334	-0.797141	4.93151	0.00180393	0.0623606
HECA	-0.565216	-0.56548	5.74493	0.00182475	0.0628988
TUBA1A	0.455148	0.455312	7.9177	0.00183474	0.0630613
CDK18	-1.95928	-1.98491	1.02892	0.00184085	0.0630899
APLP1	0.629164	0.629643	5.35774	0.0018471	0.0631234
BMPER	1.02849	1.03293	3.79619	0.00187216	0.0637975
LCE4A	-2.77917	-2.8937	0.992932	0.0018786	0.0638351
MTCO3P12	0.672525	0.6731	5.26067	0.00193914	0.0657056
ALS2CL	0.870149	0.871895	3.73008	0.00199534	0.0674188
CDR2	-0.62763	-0.628103	5.13006	0.00201863	0.0679409
DLGAP5	-0.914754	-0.919416	5.42031	0.00202215	0.0679409
TMEM132B	1.68655	1.71043	2.19525	0.00207644	0.0694919
MATN2	-1.33544	-1.34344	2.34007	0.00207993	0.0694919
TNC	-0.493191	-0.493298	6.1021	0.00209249	0.0697167
PIK3R3	1.0801	1.08444	3.32472	0.00216234	0.0718437
MCM2	-0.682563	-0.683785	5.49604	0.00217343	0.0719461
NPFFR2	-2.43274	-2.50654	0.762805	0.00217745	0.0719461
FER1L4	0.796042	0.797723	4.06787	0.00218669	0.0720522
CTSC	-0.470421	-0.470554	7.19529	0.00220292	0.0723877
FLCN	-0.664196	-0.664845	4.64912	0.00227895	0.0746808
NDC80	-1.50364	-1.51994	4.41106	0.002286	0.0747072
PRICKLE3	-2.36662	-2.42946	0.335243	0.00248718	0.0808634
CACNA1C	0.594139	0.594545	5.31449	0.0024879	0.0808634
SAMD9	0.462451	0.462532	6.90404	0.00251189	0.081264
DENND2A	-2.25956	-2.33122	1.77288	0.00251381	0.081264
TTK	-1.12044	-1.12833	4.45196	0.00252837	0.0815144
PDE10A	-1.26018	-1.27029	2.94605	0.00257334	0.0827411
MGAM	1.15788	1.16338	2.68693	0.00261836	0.083963
ERCC6L	-2.04559	-2.11434	3.34527	0.0026303	0.0841203
HMGA2	-0.483495	-0.483726	7.44675	0.00264006	0.0842073
LFNG	1.90412	1.93121	1.10993	0.002658	0.0844683
SLC20A1	0.406318	0.406351	8.48173	0.00266236	0.0844683
ANKS1A	-0.608881	-0.609368	5.21937	0.00267324	0.0845891
FAM171A1	0.667481	0.668292	5.18295	0.00268332	0.084684
CORIN	1.46536	1.48896	3.72279	0.00271049	0.0853164
SLC25A12	0.728995	0.730265	4.49177	0.00273193	0.0857655
PHF14	0.679118	0.680155	4.72492	0.00277717	0.0865543
FOXL2NB	1.97633	2.01065	1.63805	0.0027779	0.0865543
PDGFRA	0.497764	0.498046	6.7418	0.00277877	0.0865543
LMLN	0.756517	0.757909	3.96712	0.00279615	0.0868696
SYNGR2	-0.52636	-0.526507	5.96282	0.00282505	0.08754
GLRX	-0.468672	-0.468799	6.69271	0.00283509	0.087624
MAFF	-0.426749	-0.426807	7.39176	0.00284295	0.0876406
KCND2	1.12812	1.13221	2.6797	0.00285621	0.0878228
HJURP	-1.00281	-1.00902	4.99572	0.00287009	0.0880236
TLR6	1.43485	1.44584	2.8213	0.00290705	0.0887929
AK5	-0.613675	-0.614483	5.5592	0.00291702	0.0887929
AGAP2	1.1628	1.16697	2.46051	0.00291745	0.0887929
SLC43A2	1.46419	1.48031	2.43665	0.00293747	0.0891753
P4HA2	-0.423968	-0.424026	7.4782	0.00297416	0.0900605
TREM1	1.833	1.84963	1.24631	0.0030216	0.091266
LGR4	-0.665445	-0.666379	4.87896	0.00304569	0.0917621
GABRB1	2.43383	2.50787	0.595534	0.00305563	0.0918301
GPRC5A	0.80786	0.809623	4.19015	0.00306914	0.0918814
FST	-1.10681	-1.11223	3.10702	0.0030727	0.0918814
OGG1	0.913193	0.91593	3.52436	0.00309733	0.0923871
AURKB	-1.52954	-1.55214	4.22981	0.00311304	0.0926247
COL11A2	1.85387	1.88058	1.1872	0.00313648	0.0928868
ASIC1	1.63764	1.6556	1.68609	0.00313738	0.0928868
STYK1	-1.93643	-1.97037	1.80442	0.0031834	0.0940163
KDELR3	-0.476723	-0.476834	6.85538	0.00321892	0.0948313
CENPK	-1.52435	-1.54447	3.84643	0.00324152	0.0952626
E2F1	-1.48075	-1.508	4.1011	0.00326221	0.0956356
NT5M	-2.83917	-2.99091	0.596374	0.00327061	0.0956474
TJP2	-0.546351	-0.546906	6.66641	0.00331824	0.0967354
TBX2	-0.511415	-0.511623	6.79552	0.00332399	0.0967354
PRKAR2B	-4.74578	-1.44269e+08	0.997128	0.00338232	0.0981939
SH3PXD2A	0.419137	0.419192	7.92356	0.00342188	0.099102
MEGF6	-0.974185	-0.976507	3.05409	0.00354415	0.102164
STRIP2	-1.18241	-1.18904	2.50738	0.00354471	0.102164
CCDC188	1.3747	1.3861	2.41651	0.00356916	0.102622
H2AFZ	-0.433136	-0.433242	7.52754	0.0036069	0.103458
ZNF573	1.68177	1.69913	1.6889	0.0036705	0.104708
SLC35E1	-0.44827	-0.448372	6.87399	0.0036731	0.104708
GPR176	-0.441267	-0.44134	7.49595	0.00367698	0.104708
SERINC2	-0.632002	-0.632666	5.20976	0.0036855	0.104708
GCAT	-0.780544	-0.782409	3.93772	0.00375565	0.106449
SLC9A3R1	-0.687536	-0.688681	4.51517	0.0037706	0.10662
ITGA7	-0.878743	-0.880228	3.24563	0.00379286	0.106996
PLXNB3	0.871379	0.873768	3.4429	0.00390056	0.109776
PRORSD1P	2.60259	2.71482	0.70791	0.00395186	0.11091
MGLL	-0.397559	-0.397598	8.36039	0.00395942	0.11091
PAPPA	0.398728	0.398765	8.72249	0.00398688	0.111193
OTUD1	-1.14836	-1.15354	2.6151	0.00398951	0.111193
GAB2	-0.523402	-0.523668	5.72017	0.00399741	0.111193
NUSAP1	-0.799885	-0.802739	5.2195	0.00402028	0.11157
SLC35D1	-0.407476	-0.407516	7.49998	0.00409128	0.113277
HAS1	1.28287	1.29089	2.06705	0.00428073	0.118249
FN3K	-0.961706	-0.964422	3.05991	0.00437681	0.120625
GMFG	0.706934	0.708159	4.12989	0.00439005	0.120711
ATP8B1	-0.486773	-0.48698	6.75912	0.00443281	0.121607
RNLS	1.08567	1.09002	2.79571	0.00451676	0.123627
ZNF232	-1.80809	-1.84392	1.96874	0.00455776	0.124464
JARID2	0.600724	0.601187	5.23758	0.00464771	0.126632
PHLDB1	0.438012	0.438114	7.25036	0.00474063	0.12887
ASPM	-0.651222	-0.652701	6.87293	0.00475246	0.128898
MYPN	0.568167	0.568836	5.71669	0.00477559	0.129
FOXE1	0.701912	0.703097	4.2279	0.00477832	0.129
NOTCH1	-0.474861	-0.475041	6.3092	0.00478858	0.129
TMEM131	0.442885	0.442987	6.91207	0.00482483	0.129685
TRABD2A	-0.685718	-0.686713	4.3186	0.00486277	0.130279
DPH1	-0.646468	-0.647245	4.5462	0.00486873	0.130279
MGAT4C	-4.749	-1.44269e+08	0.405015	0.00490941	0.131075
CDH9	-1.70509	-1.72529	1.04845	0.00495721	0.131902
DIAPH3	-0.648723	-0.650178	6.11236	0.00496247	0.131902
RAB32	-0.474773	-0.474951	6.30966	0.00500251	0.132515
CAMK2N1	0.557437	0.558109	6.07013	0.00500766	0.132515
B3GNT5	-0.942556	-0.946071	3.33708	0.00503759	0.133012
ZNF629	0.669445	0.670521	4.38772	0.00510745	0.13456
DNAH10OS	-1.99022	-2.02765	1.319	0.00516086	0.135668
LAMA1	-0.733427	-0.734699	3.91134	0.00519342	0.136225
SYTL3	-0.721761	-0.722972	4.21328	0.00526284	0.13755
CXCL3	-0.869055	-0.871138	3.10025	0.00526695	0.13755
S100A10	-0.491334	-0.491693	6.51244	0.00533056	0.138643
ADAMTSL1	-0.511971	-0.512392	6.49246	0.00533198	0.138643
CARD6	0.69129	0.692636	4.6263	0.00537647	0.139497
AP1G2	0.734611	0.735969	3.89755	0.00539565	0.139691
CD109	0.453741	0.453875	7.14709	0.00575006	0.148545
MTRF1	0.879973	0.883246	3.44104	0.00578483	0.149122
FAM43A	1.38761	1.39991	2.87707	0.00584836	0.150435
SOD2	-0.422857	-0.42295	7.01222	0.00587707	0.150849
HIRA	-0.958549	-0.961805	3.23351	0.00590873	0.151337
PDLIM7	0.432864	0.432966	7.23507	0.00592347	0.15139
PMP22	-0.981245	-0.987507	3.72012	0.00597856	0.152472
HOXB-AS3	1.25283	1.26205	2.68317	0.00600445	0.152664
ARRDC1	-0.582742	-0.583194	4.87626	0.0060116	0.152664
TMEM159	-0.676898	-0.677798	4.1718	0.00605093	0.153079
OR2A1-AS1	1.67276	1.69517	1.04168	0.00605355	0.153079
ARID1A	-0.438099	-0.438215	6.83033	0.00611174	0.154225
ABCC5	0.550848	0.551362	5.33188	0.00612697	0.154284
LRRCC1	-0.802403	-0.804332	3.61791	0.00617958	0.155007
PCED1A	0.405382	0.405417	7.51497	0.00618163	0.155007
B4GALT2	-0.441631	-0.44177	6.68229	0.00620225	0.155199
SAPCD2	-1.50846	-1.54093	3.49423	0.00628108	0.156843
ARHGEF9	0.555379	0.55576	5.352	0.00637366	0.15788
MYDGF	-0.409736	-0.409791	7.68563	0.00638065	0.15788
FARS2	0.927603	0.931796	3.35387	0.00638344	0.15788
RPLP0P2	-1.32292	-1.33022	1.72444	0.00640194	0.15788
EGFL7	-1.10117	-1.10488	2.47775	0.00640619	0.15788
ZNF562	0.604401	0.605203	4.75203	0.00641182	0.15788
ENO2	-0.527326	-0.527688	5.64123	0.00641963	0.15788
MSRA	1.11222	1.11663	2.69111	0.00642817	0.15788
EMC10	-0.553712	-0.554087	5.05685	0.00646264	0.158201
TEK	0.598188	0.599042	5.21651	0.00646772	0.158201
CNTN5	-1.40792	-1.42175	1.78983	0.00653027	0.159169
RHBDL2	-1.37261	-1.38399	2.1384	0.00653389	0.159169
CCDC149	-0.622201	-0.622864	4.6274	0.00659405	0.160308
DLG3	1.08541	1.0912	2.89897	0.00663783	0.161045
ZNF605	0.678674	0.679791	4.01358	0.00665408	0.161112
ZDHHC18	-0.526255	-0.526554	5.53895	0.00667952	0.161401
HEXB	-0.401422	-0.401467	7.72343	0.00673269	0.162358
LITAF	0.658024	0.658719	4.33537	0.00686664	0.165255
PPFIBP2	0.789744	0.791885	3.52685	0.00689955	0.165714
NAV2	-0.519566	-0.520103	6.05845	0.00694666	0.166511
TTLL5	-0.568226	-0.568747	5.23784	0.00696851	0.166701
TCEAL9	-0.439939	-0.440074	6.77674	0.00703343	0.167823
AKAP6	1.47212	1.48483	1.47034	0.00704347	0.167823
ALDH5A1	0.593911	0.594436	4.68606	0.00710967	0.169063
ZNF300P1	1.33781	1.35129	2.13326	0.0071902	0.170639
RGMB	-0.406927	-0.407027	7.77127	0.0073372	0.17366
ASS1	-1.18764	-1.19175	2.1296	0.00734653	0.17366
CLIC4	0.357184	0.357192	10.249	0.00737164	0.173675
CHAC2	1.28711	1.3008	2.48137	0.00737623	0.173675
PIK3C3	0.480343	0.480546	6.0198	0.0074262	0.17422
FLRT2	-0.419331	-0.419387	7.41675	0.00742849	0.17422
ATP9A	0.518559	0.518932	5.75875	0.00751084	0.175807
PBX1	0.653994	0.655114	4.66442	0.00754355	0.176227
C20orf96	1.12451	1.13156	2.75522	0.00762494	0.177781
OAS1	-1.01168	-1.01427	2.49997	0.00776772	0.180758
BCKDHB	0.61972	0.620243	4.80062	0.00792972	0.183075
TBC1D19	0.596608	0.597347	4.85484	0.00794129	0.183075
TMEM136	-0.544555	-0.544984	5.08072	0.00794493	0.183075
ADM	-0.408151	-0.408235	7.56215	0.00794962	0.183075
FBXO17	-0.637746	-0.638687	4.65596	0.00795491	0.183075
CCNA2	-0.602106	-0.603524	5.67617	0.00795913	0.183075
ZNF528	0.606704	0.607457	4.51451	0.00806085	0.185059
NR2F1-AS1	0.867752	0.870985	3.43115	0.00808867	0.185342
NEDD4L	-0.449311	-0.449458	6.36901	0.00817907	0.187055
C7orf50	-0.493488	-0.493707	5.97063	0.008218	0.18709
P3H2	0.90172	0.904448	3.16944	0.00823067	0.18709
FBXO9	0.509412	0.509808	5.49609	0.00823686	0.18709
IFI27	-0.597701	-0.59804	4.51919	0.00824317	0.18709
MAGI2	-0.870269	-0.873241	3.18648	0.00834562	0.189057
HTR1B	1.80992	1.85357	1.22452	0.00838696	0.189634
SIGLEC22P	1.79577	1.8239	1.17285	0.00842082	0.189744
NR2C2AP	-1.39923	-1.41736	2.62722	0.00845937	0.189744
PPP1R13L	1.51363	1.54364	2.37861	0.00846301	0.189744
FBXL19-AS1	1.18835	1.19461	2.44174	0.00846719	0.189744
SIAH2	-0.521958	-0.522261	5.41877	0.00847112	0.189744
DHFR2	1.23487	1.24456	2.70241	0.00851017	0.190171
PTGFR	-0.861129	-0.864114	3.25105	0.00853458	0.190171
OASL	-1.7305	-1.75204	0.728438	0.00853789	0.190171
FIGN	-0.754469	-0.756295	3.71105	0.00860285	0.191219
SFXN5	1.00321	1.00849	2.97118	0.00863077	0.191219
TAP1	-0.490405	-0.490551	5.88404	0.00863289	0.191219
OPN1SW	-0.794553	-0.796868	3.33477	0.0087046	0.192451
TRNP1	-0.427461	-0.427569	7.14946	0.00873938	0.192863
TTLL7	-0.508921	-0.509267	5.72181	0.0088134	0.194138
APOD	1.77792	1.80591	0.693678	0.00886781	0.194978
POFUT2	-0.423283	-0.423385	6.75246	0.00898576	0.197209
TMPRSS11E	-0.44454	-0.444631	6.11319	0.00903973	0.197499
BHLHE40	0.461359	0.461571	6.28185	0.00904207	0.197499
HSPB1	0.375904	0.375938	8.76947	0.00904855	0.197499
MOXD1	-0.564282	-0.564801	4.95441	0.00908562	0.197683
BGN	0.869911	0.871832	2.80862	0.00909001	0.197683
CAT	0.59698	0.59793	4.8124	0.00910948	0.197747
MAFG	-0.446665	-0.446792	6.43319	0.00915071	0.198189
ARL4C	1.30095	1.30905	2.14111	0.00916298	0.198189
PHLDB2	-1.03999	-1.0456	2.68029	0.00929325	0.200644
TCF7L1	1.27257	1.28138	2.31736	0.00931081	0.200661
ATP6V0B	-0.449862	-0.450005	6.32012	0.0093472	0.200769
C2orf16	1.73923	1.77784	1.19104	0.00934941	0.200769
MCTS2P	1.99496	2.0536	0.765836	0.00939682	0.200804
LBH	0.939413	0.942308	2.85923	0.00940135	0.200804
TMEM198B	0.759423	0.761809	3.64842	0.00940141	0.200804
PTCH1	-1.14143	-1.14987	2.5181	0.00947621	0.201751
GAR1	-0.678131	-0.679729	4.0665	0.00949768	0.201751
CIAO2B	-0.488671	-0.488928	5.73855	0.00950236	0.201751
CSTA	0.656673	0.657539	3.8037	0.00951754	0.201751
PIK3IP1	0.876806	0.881202	3.7344	0.00954519	0.201751
GSTM2	0.948706	0.953771	3.15491	0.00954696	0.201751
SLC46A1	1.5072	1.52108	1.63275	0.00961818	0.202898
FOXM1	-0.76767	-0.770932	5.52678	0.00965461	0.203308
ASH1L-AS1	-2.15134	-2.22165	0.558051	0.0096718	0.203312
HOXA-AS2	2.18028	2.26495	1.49584	0.0097377	0.204338
ZMIZ1-AS1	1.41194	1.42768	1.68749	0.00976116	0.204472
EXD2	-0.59889	-0.599693	4.71715	0.00983428	0.205643
EBF1	-0.51226	-0.512722	5.39182	0.00985272	0.205669
C1QTNF6	1.28199	1.29161	2.20112	0.0099164	0.206638
CCDC85B	-0.419875	-0.419958	7.60817	0.00993609	0.206688
RPL26P6	-1.11462	-1.12006	2.00518	0.00998227	0.207182
NUAK2	-0.922475	-0.927438	3.26075	0.00999449	0.207182
KAT2A	0.495158	0.495423	5.60021	0.0100339	0.207639
MINDY2	0.43025	0.430372	6.75772	0.0101256	0.208959
ZNF561	0.611864	0.612756	4.57664	0.0101326	0.208959
UAP1L1	-0.693511	-0.695032	3.7595	0.0101638	0.209241
VEGFA	0.419898	0.419986	6.654	0.0102065	0.209368
VMP1	-0.428628	-0.428744	6.68239	0.0102072	0.209368
PKN3	-1.31325	-1.3316	2.41019	0.010224	0.209368
PLEKHO1	-0.534682	-0.53515	5.39245	0.01024	0.209368
ARHGEF34P	1.61395	1.63887	1.28134	0.0102602	0.209424
PCDHB2	1.90283	1.95318	0.635357	0.0105373	0.214148
NDRG1	0.429773	0.429885	6.6526	0.0105418	0.214148
DUSP7	-0.509116	-0.509529	5.38999	0.0105563	0.214148
RNF128	-0.997884	-1.00101	2.45392	0.0105633	0.214148
SHB	-0.990888	-0.995931	3.09851	0.0105838	0.214202
KIFC3	-0.430562	-0.430684	6.90966	0.0107064	0.216293
ZNF749	1.31094	1.32423	2.08977	0.0107233	0.216293
COG4	0.465061	0.465307	6.02981	0.0107608	0.216684
GPR180	-0.461097	-0.461312	5.8292	0.0107873	0.216801
KCNQ1OT1	-0.595587	-0.596386	4.59073	0.0108029	0.216801
DGKI	0.710682	0.712413	3.93613	0.0109982	0.220107
TMEFF2	-0.816424	-0.818576	3.24275	0.0110044	0.220107
ZNF34	-1.89867	-1.94883	1.48898	0.0110412	0.220474
DNAJC6	-0.466649	-0.466868	5.94818	0.01109	0.220925
IRAK3	-1.12796	-1.13411	3.14866	0.0111158	0.220925
CLIP3	-0.480695	-0.480932	5.84895	0.0111192	0.220925
GIT1	-0.472604	-0.47285	5.62046	0.0111491	0.221151
MAPRE3	0.63472	0.635462	4.21839	0.0113105	0.223981
FANCE	0.493269	0.493532	5.43437	0.0113447	0.224288
ALKBH8	0.734168	0.736276	3.7636	0.0114192	0.225387
MMP2	0.369518	0.369553	8.27051	0.0114686	0.225989
PBLD	0.780262	0.782973	3.34472	0.011521	0.226417
METTL4	0.647457	0.648752	4.09235	0.0115386	0.226417
HNMT	0.628973	0.629937	3.961	0.011547	0.226417
CAP1	0.367202	0.367229	8.90661	0.0115919	0.226782
GPD1	0.576577	0.576959	4.37566	0.011612	0.226782
H2AFY2	1.11035	1.116	1.97661	0.0116373	0.226782
PIM3	-0.494451	-0.494764	5.50633	0.0116578	0.226782
DBH	1.56232	1.58169	1.207	0.0116605	0.226782
RAPH1	0.423979	0.424055	6.55958	0.0117791	0.228657
SLC8A1	0.593721	0.59513	5.14128	0.0117951	0.228657
DUSP28	1.57324	1.59776	1.51478	0.0118449	0.229251
HOMEZ	0.860094	0.86324	2.95639	0.0118769	0.229401
LYRM7	0.522983	0.523371	5.28051	0.0118911	0.229401
SARM1	1.2228	1.2334	2.15041	0.0119317	0.229815
EFEMP1	-1.44081	-1.45538	1.9946	0.0120127	0.231003
ZNF585A	1.13537	1.14198	2.09953	0.0120569	0.231267
HS1BP3	-0.560366	-0.561	4.60397	0.0120651	0.231267
HS3ST5	-1.80974	-1.84903	1.04982	0.0122375	0.234196
CEP41	0.633181	0.634372	4.42975	0.0122702	0.234447
TRIM58	-0.430937	-0.431064	6.77119	0.0122927	0.234502
TMEM225B	-1.83499	-1.87107	0.608671	0.0123136	0.234526
VASN	-0.36589	-0.365905	8.95529	0.0123466	0.234561
CLTC	-0.358463	-0.358484	8.98809	0.0123546	0.234561
TRMU	-0.575359	-0.576246	4.81569	0.012437	0.235751
C2CD2L	-0.586597	-0.587296	4.51812	0.0124579	0.235773
ABTB1	-0.601097	-0.601965	4.43838	0.0125474	0.237092
KLHL24	-0.591679	-0.592295	4.41816	0.012669	0.239012
SLC16A14	0.952758	0.957858	3.65585	0.0128371	0.241802
APCDD1L-DT	-2.51536	-2.66113	1.22199	0.0129054	0.242708
CDCA7L	-0.584802	-0.585853	4.94211	0.0130512	0.244719
ZNF75A	0.780468	0.783014	3.51665	0.0130533	0.244719
SDC3	0.592836	0.593579	4.5118	0.013124	0.24547
LEMD2	-0.42188	-0.421994	6.62507	0.0131344	0.24547
KIF18B	-1.02452	-1.03432	4.55184	0.0131844	0.245794
CXCL2	-0.529601	-0.529854	5.05969	0.0132035	0.245794
FAM207A	-0.696141	-0.698174	3.93548	0.0132134	0.245794
ABHD11	0.95263	0.956905	3.06045	0.013243	0.245961
CDKN2B	0.562136	0.562673	4.84592	0.0133426	0.24674
RBSN	-0.467581	-0.467789	5.81482	0.013352	0.24674
GCNT2	-0.568819	-0.569582	5.14749	0.0133581	0.24674
CAND2	0.706253	0.70788	3.69424	0.0133674	0.24674
LXN	0.675167	0.676815	3.89	0.0135369	0.249483
ICAM5	0.510559	0.510833	5.27285	0.0138235	0.254374
CCNB1	-0.520961	-0.521967	6.17311	0.0138608	0.254668
NBPF3	-0.556523	-0.557288	4.72984	0.0138978	0.254957
C2CD2	-0.450904	-0.451094	6.60313	0.0140601	0.257538
HLA-F	-1.36355	-1.3757	1.41608	0.0141773	0.259289
CEP135	0.628171	0.629616	4.44897	0.0142248	0.259761
ALDH3B1	0.460394	0.460635	6.02971	0.0142611	0.260026
RCAN3	0.722981	0.724922	4.23644	0.0143638	0.2615
POLR3GL	0.530403	0.530939	4.91861	0.0144255	0.262223
IL1B	0.696314	0.697397	3.89179	0.0144795	0.262585
ZNF582	1.42464	1.44205	1.20864	0.0144892	0.262585
ZWINT	-0.881176	-0.888445	4.92339	0.0145396	0.262964
KIAA1841	0.701222	0.703387	4.05956	0.0145542	0.262964
ISOC1	-0.553445	-0.554069	4.50463	0.0146467	0.264238
SMPDL3A	-0.624413	-0.625562	4.068	0.0147338	0.265408
ATP8A1	-0.815927	-0.818075	3.01039	0.0147751	0.265752
P2RX4	-1.33271	-1.34229	1.7051	0.0148557	0.2668
ARMC9	0.499724	0.500182	5.13858	0.0149247	0.2672
FANCD2	-0.83729	-0.843561	4.12377	0.0149258	0.2672
RPH3AL	1.3685	1.38561	1.70157	0.014945	0.2672
KLF9	0.420119	0.420257	6.49174	0.0149711	0.267268
ENPP7P4	-2.78699	-3.00753	0.494409	0.0151131	0.269304
VPS45	0.490193	0.490543	5.3121	0.0151302	0.269304
DHFR	0.620151	0.62221	4.97738	0.0151634	0.269494
UBE2Q2P1	1.11393	1.12329	2.18919	0.0155303	0.275605
COL21A1	-1.49498	-1.51385	0.94155	0.0157057	0.278306
ZNF579	-0.557242	-0.557896	4.6496	0.0157859	0.279312
CCDC96	2.20833	2.3141	1.05198	0.0159168	0.280776
SLC1A5	-0.355861	-0.355879	8.69582	0.0159206	0.280776
ABHD17C	-0.798598	-0.80213	3.54516	0.0159391	0.280776
RNF145	-0.422559	-0.422722	6.60287	0.0159903	0.281264
PPIC	-0.508093	-0.508536	4.88922	0.0160446	0.28145
ANKRD12	-0.451876	-0.452126	6.09853	0.0160701	0.28145
PRKY	0.554748	0.555607	4.63128	0.0160714	0.28145
MAGEH1	-0.546297	-0.54694	4.58136	0.0161092	0.281451
TCTEX1D1	-2.66616	-2.88418	1.46123	0.0161186	0.281451
MFSD2A	-0.844355	-0.847839	3.08669	0.0161722	0.281585
MXD3	-1.4419	-1.47677	2.99388	0.0161733	0.281585
RNF182	-0.675748	-0.677466	4.19439	0.0165873	0.28828
MIR4477B	1.45134	1.47648	1.50104	0.016606	0.28828
NFKBIA	-0.486987	-0.487397	5.2702	0.0167101	0.289665
SLC25A37	-0.40293	-0.403066	6.72927	0.0167641	0.290182
PSCA	-1.74784	-1.79606	2.02795	0.0167957	0.290309
RMI2	-1.22017	-1.23597	3.0911	0.0168619	0.291031
CSRNP3	0.766415	0.768896	3.09168	0.0169726	0.29252
VWA8	0.513181	0.513677	4.98317	0.017003	0.292622
CHURC1	0.530123	0.530766	4.7321	0.0170692	0.293339
LINC00517	0.528209	0.528571	4.70853	0.0171037	0.293457
PGM2L1	0.741277	0.74363	3.74527	0.0171772	0.293457
BBS10	0.64635	0.647891	4.04127	0.0171924	0.293457
PROS1	-0.456763	-0.456978	5.47549	0.0171952	0.293457
HEYL	1.23226	1.24169	1.94295	0.0172016	0.293457
HACD1	0.770284	0.773215	3.54595	0.0172232	0.293457
ACVR2A	0.884906	0.888641	2.95489	0.0173031	0.294398
POLR1E	0.53053	0.531222	4.89281	0.0173383	0.294579
KRT7	1.26795	1.28826	3.04797	0.0173972	0.294995
RARB	1.47491	1.49854	1.53587	0.0174121	0.294995
GGT1	-0.891874	-0.894342	2.64203	0.0174466	0.295133
ZSCAN26	-0.670779	-0.672458	3.85554	0.0174696	0.295133
LINC02407	-0.865273	-0.868294	3.10005	0.0175341	0.295805
MED6	0.703611	0.705617	3.53387	0.0176053	0.296451
COL11A1	0.552161	0.552558	4.862	0.017622	0.296451
SLC5A12	1.07823	1.08492	2.17272	0.0177684	0.298495
SMIM10	0.652697	0.654701	4.42668	0.0178144	0.298847
MCTP2	-0.730737	-0.732954	3.3299	0.0178513	0.299047
MAST4	0.545324	0.546122	4.5058	0.0179091	0.299596
MARK4	-0.422821	-0.422964	6.07466	0.0179513	0.299881
MYRF	-0.915655	-0.918565	2.84609	0.018003	0.300326
PTCSC3	-4.04256	-1.44269e+08	1.06294	0.0180301	0.300345
CD163L1	-0.506149	-0.506452	5.22611	0.0180739	0.300345
PSMA3-AS1	0.549773	0.550401	4.84384	0.0180795	0.300345
HOXB4	-0.440972	-0.441161	5.81438	0.0181086	0.300412
CDC42EP4	0.483145	0.48352	5.59445	0.0182646	0.30258
ZMAT5	0.888477	0.892363	2.99742	0.0184153	0.304018
ENY2	-0.464109	-0.464453	5.56866	0.0184383	0.304018
TIMP4	0.790952	0.793787	3.26861	0.0184591	0.304018
STXBP4	0.832281	0.836449	3.03082	0.0184627	0.304018
CFAP126	0.890306	0.894456	2.71086	0.0184784	0.304018
IFT46	0.610411	0.611519	4.04987	0.018719	0.307552
ADAM19	0.559296	0.560244	4.89855	0.0188424	0.309155
MCM6	0.489698	0.490333	5.47198	0.0188965	0.309617
ADIRF-AS1	1.52551	1.55137	1.61741	0.0189438	0.309968
ZNF275	-0.504497	-0.504901	5.03145	0.0190017	0.310491
ARLNC1	-1.33961	-1.35254	1.15748	0.0190284	0.310502
MAPK8IP1	1.71517	1.75764	0.573431	0.0190583	0.310567
BMP6	1.26609	1.29554	4.91557	0.0192557	0.313282
CUBN	1.37181	1.38664	1.38238	0.0192773	0.313282
ZNF772	0.950781	0.956087	2.65653	0.0193746	0.313525
OSER1	-0.510471	-0.510976	4.91399	0.0193772	0.313525
USP18	-0.940898	-0.94433	2.3313	0.0193972	0.313525
PAM	-0.347339	-0.347357	8.9215	0.0194221	0.313525
ZNF471	1.73117	1.76973	0.964774	0.0194258	0.313525
BNIP3P4	1.39549	1.41704	1.55699	0.0194495	0.313525
RARRES1	1.94354	2.01086	0.984989	0.0195168	0.314149
IP6K3	1.35138	1.36609	1.00211	0.0195609	0.314149
C6orf132	-0.608874	-0.609991	4.28639	0.019567	0.314149
CDCA8	-0.749601	-0.754518	4.72977	0.0196236	0.314631
SPECC1	0.708184	0.710405	3.33323	0.0197158	0.314631
MFAP5	0.54485	0.545887	5.08277	0.0197249	0.314631
JADE3	-0.878149	-0.881891	3.08245	0.0197257	0.314631
KCNN4	1.00264	1.00675	2.237	0.0197285	0.314631
FSD1	3.03456	3.45737	0.754055	0.0197961	0.315288
PDE3A	0.810328	0.814149	3.28944	0.0198849	0.316281
SIX4	-0.511327	-0.511772	4.75896	0.0199141	0.316324
CDK2	-0.477695	-0.478158	5.82924	0.0199976	0.316875
C9orf72	-0.807129	-0.809395	3.21182	0.0200172	0.316875
LINC02057	-1.05674	-1.0633	2.29495	0.0200293	0.316875
KIAA0825	1.22074	1.22985	1.92186	0.0200547	0.316875
INPP5B	0.531082	0.5317	4.6996	0.0200853	0.31694
EXT1	-0.392433	-0.392561	7.10229	0.020327	0.320331
REEP4	-0.542707	-0.543635	4.88743	0.0203983	0.321031
ZNF699	-1.32379	-1.34229	2.03522	0.0204732	0.321787
ANKRD35	1.80335	1.85909	1.64494	0.0205528	0.322614
STK38L	0.524394	0.524928	4.56838	0.0205851	0.322692
SPAG4	0.77913	0.781976	3.12023	0.0206117	0.322692
SUCO	-0.39703	-0.397157	6.58962	0.020796	0.325152
NRIP1	0.426391	0.426602	6.12053	0.0208512	0.325589
C9orf3	0.634186	0.635666	4.29193	0.0209521	0.326231
P3H1	-0.370627	-0.370673	7.56238	0.0209542	0.326231
KIAA1147	-0.69375	-0.695535	3.46343	0.0209741	0.326231
NR1H3	0.985704	0.991117	2.39694	0.0211738	0.328909
LINC00665	1.56277	1.59324	0.895837	0.0214025	0.33203
ZNF717	1.25996	1.27292	1.67153	0.0215292	0.333563
LSM14B	-0.486517	-0.48686	5.40894	0.0215821	0.33395
ECI1	0.488575	0.489085	5.0864	0.021663	0.334512
GPAA1P2	1.68279	1.72081	0.785109	0.0216743	0.334512
SAMHD1	-0.410914	-0.411045	6.017	0.0217635	0.335455
ACVR2B	-0.916349	-0.921108	2.53461	0.0218399	0.3362
SLC2A6	0.772726	0.775778	3.34687	0.0219861	0.337425
TDRD6	1.30238	1.31466	1.33751	0.0219865	0.337425
PLEKHG4	0.437281	0.43756	5.93401	0.0220133	0.337425
SMTN	-0.371072	-0.371139	7.73454	0.0220324	0.337425
RNF13	-0.620638	-0.622403	4.37888	0.0221585	0.338924
SH3BGR	1.18221	1.19086	1.54168	0.0222042	0.339188
CCDC159	1.84672	1.90324	1.16625	0.0222917	0.34009
NR4A2	-1.38888	-1.41729	1.71028	0.0223932	0.341162
TPCN1	-0.409709	-0.409834	6.37863	0.0224506	0.341162
NRBP2	0.462609	0.463017	5.5671	0.0224594	0.341162
MSRB1	1.015	1.02156	2.48255	0.0225108	0.341162
ARHGEF5	0.966671	0.971473	2.3147	0.0225286	0.341162
WDR73	0.525466	0.52614	4.50145	0.02256	0.341162
BNIP3	-0.370591	-0.370657	7.4487	0.0225616	0.341162
PLCB4	-0.530102	-0.530852	4.65188	0.0227564	0.343673
CSMD1	-1.11286	-1.11966	1.64723	0.022826	0.344068
ATP5PO	0.533383	0.534088	4.62367	0.0228401	0.344068
CEP152	-0.566209	-0.56704	4.61756	0.0229901	0.345707
SPATA24	1.83295	1.88939	0.872609	0.0230067	0.345707
EPB41L1	0.476449	0.476829	5.13963	0.0230531	0.34597
CCL26	0.606145	0.606969	3.6301	0.0232175	0.347106
INTS12	-0.585441	-0.586597	4.01266	0.023219	0.347106
KIAA1958	-1.3327	-1.34939	1.22374	0.023236	0.347106
SLC25A23	0.845453	0.847505	3.21217	0.0232449	0.347106
C22orf46	0.862414	0.866092	2.99967	0.0233378	0.347528
LSM2	-0.810682	-0.814803	3.29021	0.0233397	0.347528
COQ3	-1.08107	-1.09236	2.45442	0.0233603	0.347528
FAM131A	-0.515962	-0.516516	4.86656	0.0233945	0.347605
TTC12	1.00447	1.01245	2.43803	0.0236123	0.35003
PHYHD1	-1.23919	-1.2531	1.99185	0.0236325	0.35003
ADGRG6	-0.441118	-0.441316	5.84163	0.0236455	0.35003
MX2	-0.894958	-0.897724	2.31515	0.0237262	0.350789
C15orf62	1.34486	1.36176	1.28782	0.023807	0.351551
EFHD1	0.565094	0.56599	4.06799	0.0238569	0.351715
ZNF503	0.502433	0.503243	5.37011	0.023877	0.351715
DSTNP1	1.55762	1.59406	1.02206	0.0239868	0.352898
CES1P1	-0.944387	-0.951051	2.73813	0.0240857	0.353811
ABCB1	-0.583437	-0.584341	4.03192	0.0241104	0.353811
HERC6	-0.473056	-0.473338	4.94165	0.0241376	0.353811
RAB40C	-0.546962	-0.547779	4.33359	0.0241733	0.353901
LPIN2	-0.394454	-0.394558	6.54756	0.024373	0.355808
TVP23B	-0.441165	-0.441418	5.45713	0.0243825	0.355808
MFHAS1	-0.570567	-0.571247	4.12725	0.0244423	0.355808
SPRY1	0.991696	0.997134	2.19549	0.0244463	0.355808
RARG	0.423493	0.423691	5.80152	0.0244637	0.355808
LGMN	-0.414872	-0.415083	6.38659	0.0244889	0.355808
ARRB2	0.588256	0.589404	3.95485	0.0245374	0.355808
CCDC86	0.521434	0.522247	4.77051	0.0245416	0.355808
L3MBTL1	1.12251	1.13226	2.19671	0.0246072	0.356328
SMG1	0.372891	0.372954	7.51673	0.024813	0.358739
MYOSLID	1.33395	1.36419	2.78227	0.0248337	0.358739
SIRPA	0.514236	0.514722	4.41435	0.0249764	0.359921
RMC1	-0.496487	-0.497009	4.69427	0.0249985	0.359921
ABCC3	0.46463	0.464966	5.0612	0.0250427	0.359921
DSCC1	-1.37094	-1.40166	2.95468	0.025059	0.359921
SNAI2	0.387905	0.388035	7.16409	0.025066	0.359921
LOXL4	0.345395	0.345404	9.14856	0.0252581	0.362245
ANTXR1	0.362569	0.362621	7.42936	0.0252967	0.362363
LPIN3	0.522908	0.52372	4.48346	0.025331	0.36242
LYSMD3	-0.416829	-0.417006	6.0599	0.0254211	0.363174
SLC9A3	1.19783	1.21147	1.8039	0.0254556	0.363174
PRR5L	0.763738	0.767128	3.98052	0.0254864	0.363174
BSN	-1.59406	-1.63493	1.36226	0.0255051	0.363174
LYSMD2	-0.557528	-0.558382	4.25462	0.02567	0.364768
NXT2	1.01047	1.02018	2.72909	0.025678	0.364768
ZSCAN30	0.453383	0.453676	5.25729	0.025722	0.364959
MANSC1	1.5536	1.57798	0.807084	0.0258133	0.36582
TESK1	-0.468274	-0.468655	5.02207	0.0258836	0.366199
ZNF236	0.577932	0.578959	4.20351	0.0259077	0.366199
PRSS12	0.421423	0.421748	6.58019	0.0259318	0.366199
CALD1	0.328917	0.328923	10.8206	0.0260127	0.366908
LINC00607	1.21195	1.22374	1.26061	0.0260972	0.367634
LMAN1	-0.337025	-0.337039	9.05116	0.0261257	0.367634
SETX	0.387167	0.387266	6.82391	0.0262094	0.368379
SYT1	0.626269	0.628411	4.1735	0.0262982	0.369194
F3	-0.489825	-0.490408	5.36107	0.02648	0.37131
CD40	0.885938	0.889408	2.79962	0.0265793	0.372266
LINC01560	1.86964	1.93588	0.671967	0.0266193	0.372389
LINC01089	0.798378	0.801421	3.12909	0.0267596	0.373916
HDHD3	-0.842427	-0.846471	2.78854	0.0271605	0.378736
RASSF2	1.23743	1.24816	1.13875	0.0271679	0.378736
SLC24A1	0.628474	0.629859	3.76612	0.02726	0.379577
OR7E12P	1.13117	1.14162	2.04045	0.0274047	0.380897
SAMD12	-0.893766	-0.897844	2.67066	0.0274477	0.380897
KIF4A	-0.816685	-0.822154	4.94742	0.0274503	0.380897
TNFRSF1B	-0.377333	-0.377401	6.88304	0.0277662	0.384834
PCDHGA4	0.694551	0.696202	3.20614	0.0278806	0.385972
SERPINB7	-0.538564	-0.539776	4.83569	0.0281358	0.388929
AMACR	1.31793	1.3375	1.49906	0.0281652	0.388929
PLK1	-0.548481	-0.550127	5.78607	0.0281917	0.388929
DNAJC25	-0.578932	-0.579961	4.12317	0.0283154	0.390185
KCND1	1.3457	1.3645	1.61472	0.0284989	0.392262
PPP1R3G	-0.815336	-0.818451	2.85843	0.0286412	0.393768
AVL9	-0.391284	-0.391423	6.46321	0.0288566	0.395411
DACT1	2.0771	2.17995	0.611414	0.0289258	0.395411
AFF3	-0.449364	-0.449708	5.84805	0.0289329	0.395411
VCPKMT	0.900308	0.904833	2.72626	0.0289484	0.395411
SKA1	-1.02399	-1.03804	4.07441	0.0289586	0.395411
BAIAP2L1	0.483524	0.484116	4.88492	0.0289591	0.395411
PARM1	-1.72207	-1.76976	0.79692	0.0290723	0.396438
HFE	0.497675	0.498278	4.84788	0.0291265	0.396438
LBX2-AS1	-1.6119	-1.65289	1.22651	0.0291713	0.396438
PWP2	0.483785	0.484329	4.89651	0.0291943	0.396438
ICAM1	-0.655274	-0.656453	3.32388	0.029204	0.396438
ZBED8	-1.08311	-1.0948	2.52002	0.0292363	0.396438
DAAM2	-0.392131	-0.392289	6.76534	0.02928	0.396438
GTPBP3	-0.549436	-0.550452	4.28913	0.0292995	0.396438
SYNPO	0.41877	0.418961	6.2086	0.0294572	0.398122
SOX13	-0.774656	-0.777656	3.08274	0.029734	0.401409
AGAP3	-0.391794	-0.391902	6.58434	0.029883	0.402587
TACC1	-0.334752	-0.334767	9.33715	0.0298886	0.402587
SERPINB8	0.421854	0.422092	5.78304	0.0299442	0.402883
HIP1R	-0.41574	-0.415968	5.70263	0.0301516	0.405217
LINC01772	1.716	1.7585	1.08894	0.0303281	0.406981
C1RL-AS1	0.637461	0.638812	3.54343	0.0303509	0.406981
POLDIP3	0.400493	0.400661	6.22194	0.0304156	0.407392
STK36	0.477443	0.477876	4.88837	0.0305079	0.407418
SPTSSB	-1.69363	-1.73583	0.529323	0.0305231	0.407418
TMEM243	-0.525536	-0.526261	4.30054	0.0305604	0.407418
SNHG11	1.13007	1.1417	1.87304	0.0305644	0.407418
RECQL	0.393292	0.393438	6.34108	0.0306096	0.407418
NT5E	-0.333812	-0.333824	9.71082	0.0306219	0.407418
OSTC	-0.363171	-0.36323	7.35378	0.0306879	0.407689
IL24	-0.951326	-0.955522	2.20807	0.0307105	0.407689
RINT1	-0.491801	-0.492251	4.93065	0.0309126	0.409918
DMXL2	0.429293	0.429566	5.72689	0.0309519	0.409984
FRMD3	0.38811	0.38821	6.60328	0.0310457	0.410772
CCDC57	0.540602	0.541423	4.49459	0.0311127	0.411203
ARHGEF26	-0.911852	-0.91706	2.52944	0.0314125	0.414464
ZNF672	-0.46345	-0.463837	5.01932	0.0314287	0.414464
PDZRN3	1.06301	1.07209	1.85691	0.0314958	0.414892
TSNAXIP1	1.04786	1.05471	1.56273	0.0316087	0.41592
GAB3	1.25619	1.26973	1.4546	0.0318211	0.418047
PCDHGA2	0.949075	0.953797	2.40394	0.0318661	0.418047
RIPK2	-0.412742	-0.412909	5.83311	0.0319018	0.418047
LSM7	-0.460821	-0.461283	5.01198	0.0319101	0.418047
BORA	-0.896056	-0.902159	3.0167	0.0319878	0.418564
EME2	0.859105	0.863343	2.8087	0.0320196	0.418564
EGFR	-0.350049	-0.350083	8.3568	0.0320559	0.418582
INSC	0.522281	0.523219	4.67782	0.0322161	0.419889
SUSD1	-0.50782	-0.508533	4.47045	0.0322721	0.419889
JUNB	0.411501	0.411632	6.02112	0.0322903	0.419889
SCD5	-0.436377	-0.436677	5.54072	0.0323146	0.419889
TMEM19	0.542515	0.543553	4.72307	0.0323497	0.419889
FKBP4	-0.386572	-0.386713	6.48635	0.0323666	0.419889
ZC3H8	0.676621	0.678355	3.46171	0.0324347	0.420316
POLL	-0.543099	-0.543866	4.13341	0.032658	0.422751
STXBP6	-0.481374	-0.481993	5.11376	0.0329566	0.426156
COL18A1	0.41639	0.416586	6.29374	0.0330082	0.426362
CTSH	-1.65221	-1.69898	0.850365	0.0331269	0.427017
PARP15	0.903115	0.90784	2.33842	0.0331303	0.427017
ACOT8	0.517211	0.518018	4.25347	0.0333001	0.428744
RNF149	-0.433166	-0.433441	5.60585	0.0335151	0.43018
BCL2L12	-0.567836	-0.569257	4.06102	0.0335244	0.43018
APBA1	-0.52794	-0.528747	4.17576	0.0335405	0.43018
FAIM	0.511317	0.512108	4.43545	0.0335555	0.43018
PHLDA2	-0.402349	-0.402559	5.98214	0.0336847	0.431373
PTGES3P1	-1.59319	-1.63906	1.22665	0.0337894	0.432251
RAPGEF3	-0.484267	-0.484662	4.73697	0.0340932	0.435672
ZC3H12C	-0.470507	-0.470987	4.75278	0.0341786	0.436296
ZNF33B	0.758946	0.76253	3.40298	0.0343265	0.437718
MALAT1	-0.336522	-0.336524	11.6202	0.0347916	0.443176
ICK	0.617825	0.620022	3.94001	0.034854	0.443369
TMEM201	-0.568923	-0.569975	4.26419	0.0348809	0.443369
TRMT10B	0.823724	0.828478	2.87666	0.0349712	0.444045
LIPT1	-1.64721	-1.70054	1.08023	0.0351024	0.444925
HOMER3	-0.455799	-0.456248	5.22766	0.0351149	0.444925
ARAP3	0.421026	0.421264	5.87931	0.035253	0.445746
CMTM7	-0.550692	-0.551498	4.08863	0.0352857	0.445746
ZNF91	0.595411	0.596738	3.51046	0.0353011	0.445746
EHD3	0.414429	0.414665	5.56667	0.0354331	0.445746
CHFR	-0.433791	-0.43408	5.36906	0.035447	0.445746
HAGH	-0.484599	-0.485165	4.59741	0.0354511	0.445746
STBD1	-1.9922	-2.09288	1.07898	0.0354524	0.445746
GPR89A	-1.00375	-1.01196	2.11911	0.0354779	0.445746
GSN-AS1	1.31136	1.33496	1.53376	0.0355277	0.445746
ZNF574	-0.552607	-0.553479	4.10126	0.0355654	0.445746
USP46-AS1	-1.96512	-2.06554	0.976675	0.0356271	0.445746
TTC13	-0.53657	-0.537492	4.09701	0.0356639	0.445746
FILIP1L	0.614411	0.615859	3.35865	0.0356641	0.445746
LY96	-0.874404	-0.878251	2.41771	0.0357198	0.445975
ADAMTS13	1.42032	1.44698	0.656988	0.0358622	0.447039
DENND5B	-0.436339	-0.436627	5.38218	0.0359052	0.447039
PIF1	-0.854556	-0.861874	3.3482	0.0359171	0.447039
DNAAF2	-0.60314	-0.604603	3.60419	0.0359973	0.447571
FAM13B	0.435895	0.43626	5.29784	0.0361018	0.448405
KRT15	-1.76211	-1.83877	1.29949	0.0362999	0.45009
PMAIP1	-0.388617	-0.388747	5.97402	0.0363128	0.45009
PRMT3	0.469356	0.469804	4.74861	0.0364429	0.450877
MSS51	-0.432844	-0.433088	4.92347	0.0364719	0.450877
DNAH11	-1.29033	-1.31081	1.47363	0.0364893	0.450877
C1orf21	-0.520561	-0.521454	4.48364	0.0366349	0.452054
JRK	0.50516	0.50621	4.86732	0.036663	0.452054
ZDHHC12	-0.538623	-0.539528	4.4295	0.0366979	0.452054
CYP39A1	1.20193	1.21316	1.14835	0.0367971	0.452571
XBP1	-0.353838	-0.353878	7.62201	0.0368156	0.452571
DPP9	0.361982	0.362073	7.07216	0.0368577	0.452623
JMJD7-PLA2G4B	-1.41398	-1.44047	1.00033	0.0368994	0.45267
ATP2B4	0.339135	0.339179	8.41859	0.0370995	0.454659
F8	1.00588	1.01239	1.96769	0.0372384	0.455894
FAM86DP	0.567721	0.568885	3.82811	0.0373655	0.456983
HSPA4L	-0.513014	-0.513574	4.4179	0.0375116	0.458211
CUEDC1	-0.448793	-0.449259	5.59184	0.0375426	0.458211
AKR1A1	-0.383431	-0.383563	6.22396	0.0376222	0.458669
SLC44A2	-0.335337	-0.335365	8.29978	0.0376568	0.458669
ISG15	-0.387341	-0.387411	6.50661	0.0378108	0.459818
TMEM17	-0.911513	-0.917734	2.17251	0.037828	0.459818
LUZP2	-1.48858	-1.52406	0.838943	0.0378957	0.460174
TNS1	1.11081	1.12187	1.38858	0.037978	0.460704
SPEF2	1.21133	1.22993	1.4659	0.0381557	0.462272
LPAR1	-0.368841	-0.368955	7.25672	0.0381948	0.462272
LINC01204	3.80532	1.44269e+08	0.536362	0.0382231	0.462272
NEU1	-0.508943	-0.509543	4.24305	0.0382716	0.46239
ZNF525	0.916735	0.923313	2.3971	0.0384366	0.463915
B4GALT4	-0.421908	-0.422232	5.62005	0.0386645	0.466116
DOP1A	0.497903	0.498547	4.39555	0.0387335	0.466116
IMPA2	2.76205	3.17407	0.789121	0.0387416	0.466116
REPS1	-0.40995	-0.410211	5.64477	0.0387752	0.466116
RPL41P1	0.626526	0.628232	3.55176	0.0388434	0.466116
MPG	-0.421483	-0.421752	5.54524	0.038892	0.466116
ATOH8	-1.25409	-1.28958	3.54564	0.0389165	0.466116
SERP2	-1.39115	-1.41749	0.841003	0.0389307	0.466116
CCNG2	-0.463778	-0.464233	4.96535	0.0390358	0.466907
MAML3	1.37282	1.39917	1.4573	0.0390839	0.467015
ANXA5	-0.3277	-0.327718	9.40773	0.0391891	0.467805
ABAT	0.579515	0.580626	3.41392	0.0392765	0.468381
TRAF5	0.538078	0.539167	4.0474	0.0393589	0.468896
APOBEC3B	-1.59584	-1.66873	2.57766	0.0394667	0.469713
ZC4H2	0.971819	0.980919	2.47341	0.0395174	0.469849
FOXF1	-0.752275	-0.754391	3.05775	0.0397254	0.471293
LEPR	-0.429075	-0.429415	5.3898	0.0397552	0.471293
ZNF69	0.97913	0.989743	2.2076	0.0397571	0.471293
TMEM69	-0.556879	-0.558075	4.18014	0.0398681	0.471545
SAA1	-0.728566	-0.730875	3.00282	0.0398718	0.471545
AMD1	0.359313	0.35941	7.06832	0.0398966	0.471545
SCN2A	2.2635	2.46935	0.721356	0.0400431	0.472809
FLI1	-0.665133	-0.667458	3.56582	0.0401281	0.473345
EFS	1.61541	1.66813	1.09293	0.0402907	0.474796
B2M	-0.321419	-0.321422	10.9586	0.0404078	0.475707
LRRC37A4P	-1.59262	-1.64496	1.22778	0.0404571	0.475819
CCDC9B	0.370458	0.370597	6.91344	0.0407277	0.478306
ABI3	-0.879258	-0.883885	2.28867	0.0407666	0.478306
DUSP10	-0.506265	-0.507203	4.43118	0.0408174	0.478306
LYPD1	1.36147	1.41735	4.12175	0.0408285	0.478306
GMCL1	-0.456981	-0.457342	5.06606	0.0410321	0.479551
FNIP1	-0.409749	-0.409963	5.52377	0.0410828	0.479551
SAMD14	-0.505234	-0.505947	4.25969	0.0411245	0.479551
ITGB3	-1.25608	-1.27904	1.88835	0.0411696	0.479551
PC	0.4738	0.474456	4.75308	0.0411717	0.479551
PLEC	0.336173	0.336177	11.3839	0.0411837	0.479551
SLC15A4	-0.423604	-0.423926	5.4402	0.0412155	0.479551
GLI2	0.476906	0.47777	5.08177	0.0413304	0.480026
UBALD2	-0.402812	-0.40298	5.98654	0.0413365	0.480026
C1RL	0.417883	0.418113	5.3231	0.0415343	0.480983
TENM1	0.823728	0.827575	2.33925	0.0415626	0.480983
ZNF598	-0.392443	-0.392615	5.95676	0.0415792	0.480983
ALDH1B1	0.429574	0.429932	5.37011	0.041608	0.480983
ZNF829	0.975311	0.982308	1.98959	0.0416201	0.480983
TIRAP	-0.886084	-0.891191	2.74153	0.0416633	0.481018
TTC30B	1.75036	1.82725	0.863885	0.0418356	0.482245
SHC4	1.32254	1.34641	0.979619	0.0419211	0.482245
SLC18B1	0.588837	0.589949	3.30865	0.041953	0.482245
SH3PXD2B	-0.446604	-0.446897	4.94546	0.0419679	0.482245
SENP7	0.497279	0.498106	4.35201	0.0419711	0.482245
ABR	-0.372783	-0.372913	6.62476	0.04203	0.482338
MRPL14	-0.464203	-0.464765	4.74042	0.0420599	0.482338
ARL6	0.85507	0.860512	2.60086	0.0421329	0.482712
SLC2A13	0.35306	0.3531	7.17007	0.0422624	0.483344
DCLRE1A	0.780078	0.784042	2.98536	0.0423262	0.483344
CTU2	-0.510798	-0.511648	4.17296	0.0423426	0.483344
SLC41A2	-0.548506	-0.54937	3.86679	0.0423497	0.483344
SEMA4A	-1.43346	-1.46239	0.740714	0.0424692	0.484246
ZNF578	1.58141	1.61828	0.808597	0.0425198	0.484361
FAM19A2	-1.2452	-1.263	0.807377	0.0426664	0.485569
ZNF33A	0.579708	0.581283	4.11741	0.0427925	0.486347
SCAND2P	0.657187	0.659422	3.21503	0.0428161	0.486347
ZRSR2	-0.627754	-0.629482	3.38485	0.0428884	0.486474
SLC25A27	0.537604	0.538373	3.64031	0.0429086	0.486474
LRIG1	0.436357	0.436875	5.34976	0.0429914	0.486951
MICAL2	0.340953	0.341002	8.21844	0.0432133	0.489002
C1orf131	0.702003	0.704588	3.17464	0.043405	0.490654
VAV2	-0.452433	-0.452999	4.95595	0.0434414	0.490654
RCN3	-0.352283	-0.352324	7.82008	0.0438102	0.493649
HSPBAP1	0.876423	0.882225	2.37039	0.0438188	0.493649
BCAM	-0.421375	-0.421593	5.14471	0.0438304	0.493649
CD47	-0.35548	-0.355553	6.98863	0.0439799	0.494224
MT-CO3	0.37877	0.378775	11.1611	0.0439876	0.494224
NALCN	1.16021	1.18069	2.88167	0.0440054	0.494224
KIF14	-0.624072	-0.627489	4.88843	0.0440729	0.494518
GPRIN1	-0.776879	-0.781599	2.96472	0.0442395	0.495692
DDX58	-0.430407	-0.430707	4.97087	0.0442938	0.495692
VPS52	0.515615	0.516608	4.28485	0.0443019	0.495692
POLR3C	0.477637	0.478343	4.58462	0.0443712	0.496003
ZNF417	-0.797372	-0.8016	2.78092	0.0444967	0.496942
C8orf34	1.53969	1.59117	1.20045	0.0446033	0.497668
ITGA4	0.370391	0.370505	6.95497	0.0446846	0.498111
ZSCAN22	0.788607	0.792259	2.96175	0.0447866	0.498782
IFIT1	-0.509651	-0.510085	4.15315	0.0452538	0.502734
STRADA	0.960259	0.967174	2.23413	0.045266	0.502734
CARD10	-0.430475	-0.430809	5.14941	0.0452675	0.502734
MAP6D1	-1.21884	-1.23861	1.70451	0.0453742	0.502817
ZNF462	0.563987	0.565033	3.91864	0.0453945	0.502817
CYP26B1	2.59821	3.00281	0.87695	0.0454011	0.502817
LRRC2	1.32009	1.34395	1.13188	0.0454572	0.502969
GALE	-0.387185	-0.387339	5.64156	0.0454989	0.502969
MYO1B	0.330788	0.33082	8.30879	0.0455591	0.503169
TADA1	-0.732542	-0.735944	3.14015	0.0456403	0.503601
MAFG-DT	-0.943255	-0.951121	2.14808	0.0458459	0.505404
CDH2	0.343827	0.343877	7.35605	0.0459659	0.506001
MCTP1	-1.11885	-1.12825	1.42947	0.0459847	0.506001
UGCG	-0.336826	-0.336859	8.18144	0.0461268	0.507098
C12orf4	0.469463	0.470093	4.6509	0.046205	0.507491
LINC01432	1.98949	2.12259	0.863724	0.0464264	0.509241
SYNE2	-0.558627	-0.560703	4.97123	0.046512	0.509241
NUF2	-0.973776	-0.990841	4.60958	0.0465322	0.509241
HSD17B10	0.480471	0.481163	4.77878	0.0465534	0.509241
PSMG4	0.547451	0.548747	3.73689	0.0466249	0.509241
TUBA1C	-0.353345	-0.35345	7.40727	0.0466347	0.509241
MMAA	0.794731	0.798376	2.57557	0.0467025	0.509241
MBLAC2	0.598601	0.599797	3.77468	0.0467129	0.509241
SLC39A10	0.384439	0.384635	6.29174	0.0467541	0.509241
GAA	0.385774	0.385902	5.83178	0.04679	0.509241
TCTN1	0.451793	0.452192	4.80815	0.0470371	0.510211
CEP131	-0.503852	-0.504695	4.38064	0.0470536	0.510211
PTHLH	-1.44389	-1.4731	0.449418	0.0470838	0.510211
SH3BGRL2	0.443496	0.443965	4.88179	0.0470968	0.510211
ZNF470	0.666309	0.668499	3.48324	0.0471101	0.510211
WDR77	0.494413	0.495247	4.47568	0.0471351	0.510211
LDHAP4	2.12613	2.32703	0.955872	0.0474078	0.512366
PUS7	-0.527081	-0.528281	4.33211	0.0474263	0.512366
TPP2	0.377323	0.377518	6.0943	0.0474771	0.512366
TPM3P9	0.882869	0.888963	2.35933	0.0475139	0.512366
MMP11	-0.921634	-0.926889	2.31726	0.0475505	0.512366
SWI5	-0.484923	-0.485725	4.27347	0.0475912	0.512366
TMEM45A	-0.432189	-0.432515	5.20088	0.0477506	0.51362
PDSS1	0.961496	0.97279	2.39792	0.0477991	0.513679
ABCA1	0.416695	0.416994	5.34479	0.0478459	0.513721
CCDC36	0.686363	0.689712	3.20831	0.047932	0.514183
CD320	-0.405688	-0.405924	5.68426	0.0479827	0.514204
LPCAT1	-0.389953	-0.390154	6.18838	0.0480199	0.514204
FAM126A	0.352133	0.352204	7.13901	0.0481897	0.514764
ZNF213-AS1	0.891639	0.897734	2.37948	0.0482009	0.514764
PTK2B	0.966175	0.973359	1.51699	0.0482013	0.514764
MFGE8	0.32799	0.328015	8.45951	0.0483444	0.515831
GDF15	-0.343016	-0.343048	7.28262	0.048453	0.51653
IRF2BP2	-0.361029	-0.361124	6.66483	0.0485567	0.516698
DNER	0.396031	0.39626	6.5313	0.0485804	0.516698
CD274	-0.616477	-0.617842	3.24485	0.0485984	0.516698
ACTR8	0.43694	0.437365	4.95533	0.048653	0.516726
ADAMTS3	-1.20683	-1.22521	1.83732	0.0486874	0.516726
ADD3	0.347278	0.347353	7.52119	0.0488122	0.517591
FAM222B	-0.43123	-0.43162	4.85259	0.0489605	0.518519
ZNF649	1.05598	1.068	2.01401	0.0489864	0.518519
MRPL35	0.421554	0.42198	5.10975	0.0492614	0.520968
SLC43A3	-0.428579	-0.428999	5.08753	0.0493485	0.521429
PTGER3	-1.02368	-1.03495	2.19921	0.0494698	0.522249
KLHL25	-0.837689	-0.842001	2.65545	0.0496069	0.523235
UBE2T	-0.650017	-0.653751	4.08246	0.0497257	0.524004
PEX13	0.437656	0.438167	4.84272	0.0497675	0.524004
IL12A	-0.964839	-0.970494	1.80891	0.0499728	0.525703
IPMK	-0.649781	-0.651958	3.62959	0.0502828	0.5285
PPIB	-0.34311	-0.343174	7.06858	0.0503604	0.528528
NXF1	0.394559	0.394766	5.89405	0.0504023	0.528528
SREBF2-AS1	1.24176	1.26176	1.30412	0.0504705	0.528528
FOSB	-1.21155	-1.23125	1.03078	0.0504924	0.528528
SLC7A11	-0.34388	-0.343948	7.17721	0.0505065	0.528528
LINC00942	-1.81369	-1.91007	1.02579	0.0507549	0.530664
HAUS3	-0.56622	-0.56789	4.12388	0.0509414	0.531353
RTKN2	-2.08804	-2.22355	0.743724	0.0509425	0.531353
ZHX2	-0.611217	-0.612687	3.27681	0.0509956	0.531353
ALKBH7	-0.464706	-0.465371	4.62127	0.0510039	0.531353
MIR155HG	2.61085	3.01558	0.66142	0.051043	0.531353
ZNF141	0.92214	0.928939	2.40995	0.0511294	0.531683
RWDD2B	0.489521	0.490252	4.33904	0.0511756	0.531683
ZNF395	-0.445263	-0.445879	4.85461	0.051208	0.531683
CAPN5	0.431764	0.432168	4.74802	0.0513428	0.53262
TMEM18	-0.493587	-0.494432	4.46788	0.0514728	0.533506
GPN3	-0.463066	-0.463727	4.67881	0.0515202	0.533535
SLFN13	1.08972	1.10067	1.58285	0.0517389	0.535336
SCFD2	0.451381	0.451926	4.70016	0.0518355	0.535872
ABCA5	-0.459269	-0.45981	4.55883	0.0519299	0.536385
GOLGA3	-0.336851	-0.33688	8.30443	0.0521633	0.538331
BMP2	-0.468144	-0.468523	4.40133	0.0522533	0.538794
ZNF419	0.695573	0.697901	2.90125	0.0523359	0.538861
ALAD	0.408228	0.408566	5.57949	0.0523498	0.538861
FKTN	0.381999	0.382198	5.8319	0.0525302	0.540253
GMNN	-0.588076	-0.590698	4.1992	0.0525828	0.540317
RPSAP52	-1.03035	-1.05051	3.42878	0.0526268	0.540317
FSCN1	-0.326103	-0.326128	8.84309	0.0527738	0.54104
SH3BP2	-0.404683	-0.404898	5.49117	0.0527877	0.54104
TSPAN13	-0.425816	-0.426144	4.85705	0.052833	0.541041
NOP14-AS1	-0.735822	-0.739348	2.96128	0.0529046	0.54131
FRS3	-0.773063	-0.775944	2.67776	0.053143	0.543285
COPS6	0.344184	0.344276	7.23763	0.0532785	0.543642
TMEM126A	-0.487122	-0.487929	4.27777	0.053284	0.543642
SEPHS2	0.377933	0.378076	6.00779	0.0533143	0.543642
ID3	-0.371786	-0.371942	6.50117	0.0535451	0.545531
PROB1	-1.12495	-1.13799	1.17817	0.0537724	0.547195
PNPLA3	0.367026	0.367201	6.32629	0.0538	0.547195
MRVI1	1.42298	1.46613	1.63307	0.0538596	0.547336
RAB4A	0.525081	0.526363	4.01137	0.0540029	0.548326
HRCT1	2.59105	2.99559	0.720136	0.0541494	0.549348
FTO	0.397015	0.397281	5.53478	0.0543854	0.551205
ITGAX	-1.34542	-1.36641	0.64481	0.0544612	0.551205
MIR3648-2	1.23729	1.25508	1.3608	0.0544881	0.551205
ZNF441	0.719085	0.722457	2.74793	0.0546095	0.551205
VAMP1	0.578995	0.580746	3.46917	0.0546147	0.551205
SGCA	-0.980246	-0.986344	1.52834	0.0546318	0.551205
FIBIN	0.905843	0.910341	1.95394	0.0547372	0.551205
LRIG2	0.480456	0.481228	4.28076	0.0547833	0.551205
TP53	0.373416	0.373572	6.03482	0.054785	0.551205
SPC25	-1.51269	-1.58334	3.1189	0.0548161	0.551205
DBNDD1	-1.74593	-1.80969	0.953859	0.0548394	0.551205
DEDD2	-0.446281	-0.446715	4.51864	0.0553596	0.555966
CROT	0.497149	0.498022	4.16164	0.0556319	0.558233
CIR1	-0.411143	-0.411453	5.04793	0.0557074	0.558521
ZNF430	0.859863	0.86614	2.50774	0.0557588	0.558568
SCLY	1.23232	1.25683	1.27319	0.05581	0.558614
NAPEPLD	0.470889	0.471495	4.34867	0.0559459	0.559506
STS	-0.385518	-0.385682	5.7071	0.0562301	0.56155
QTRT1	0.472755	0.473605	4.34099	0.0562879	0.56155
PUS10	0.784906	0.788762	2.5621	0.0562911	0.56155
TTC39C	0.446053	0.446398	4.58301	0.0564505	0.562531
MFAP3L	0.528476	0.52964	3.82589	0.0564836	0.562531
LINC00847	0.506815	0.507797	3.90506	0.0565459	0.562683
SARDH	0.453225	0.453803	4.50751	0.0566847	0.563596
HTRA1	0.32478	0.324821	8.28035	0.0571095	0.566875
ZFP69	0.818382	0.823301	2.41969	0.0571632	0.566875
ZMYM5	0.545231	0.546463	3.65497	0.0572383	0.566875
PDE7B	1.6945	1.76981	1.52306	0.057256	0.566875
RPS6KB2	-0.432235	-0.432743	4.82401	0.0572606	0.566875
PYROXD2	0.513812	0.514554	4.13709	0.0572988	0.566875
SIDT1	1.52799	1.57936	0.491319	0.057396	0.567367
PCDHB8	1.21037	1.22789	0.94583	0.0575158	0.568082
CDCA7	0.879659	0.890189	3.45388	0.0580114	0.572504
FDXACB1	1.69342	1.76871	0.560361	0.058172	0.573595
RBM43	-0.573998	-0.575575	3.35273	0.0582428	0.573595
ZBTB46	1.07091	1.08145	1.88247	0.058267	0.573595
KLHL18	0.427836	0.428292	4.82396	0.0583138	0.573595
SAMD9L	0.329323	0.329352	7.60131	0.058438	0.57426
ANXA11	0.33203	0.332085	7.81507	0.0585146	0.57426
DACT3	0.696738	0.698467	2.85599	0.0585255	0.57426
NAALAD2	-0.440819	-0.441379	4.63496	0.0590375	0.578593
WBP2	-0.340641	-0.340715	6.90611	0.0590774	0.578593
TMEM100	1.28151	1.3033	1.15629	0.0591463	0.578593
PDK1	0.425067	0.425658	4.99011	0.0591605	0.578593
ERAP1	-0.364149	-0.364287	6.04224	0.0594128	0.580273
APBB1	0.37987	0.380086	5.79907	0.0594733	0.580273
ZCCHC9	-0.425071	-0.425519	4.83519	0.0594778	0.580273
METTL21A	-0.703434	-0.706025	2.79534	0.059574	0.580374
NBEAL2	0.495133	0.495999	4.08222	0.0596508	0.580374
ING1	-0.494545	-0.495552	3.9472	0.0596723	0.580374
PIGCP1	0.518201	0.519334	3.69584	0.0596823	0.580374
KIF20B	-0.475009	-0.476363	5.39772	0.0597528	0.580587
PRRX2	1.41196	1.48037	3.36908	0.0599895	0.582124
KHDRBS3	-0.453624	-0.454184	4.58526	0.0600083	0.582124
OGT	0.320974	0.320993	8.56169	0.0602152	0.583658
FBXO3	0.407114	0.40749	5.10562	0.0602889	0.583899
ATP10A	1.40473	1.4535	1.61441	0.0603431	0.583951
KMT5B	0.422308	0.422617	5.32823	0.0604815	0.584818
MRPL16	0.446506	0.447106	4.71011	0.0605866	0.584918
WEE1	-0.408507	-0.408977	5.50838	0.0605897	0.584918
NEK7	0.334704	0.334774	7.71981	0.0606542	0.585068
CAMK1G	-0.581998	-0.583541	3.57895	0.0607517	0.585536
UTP20	0.383207	0.383431	6.01936	0.0610938	0.587971
CISD2	-0.416211	-0.416616	5.17595	0.0611026	0.587971
ROGDI	0.8684	0.875606	2.44912	0.0613267	0.588775
CLP1	0.577722	0.579356	3.54457	0.0613271	0.588775
ZFP36	-0.399659	-0.399954	5.3782	0.0613338	0.588775
TEKT4P2	-1.20879	-1.22622	1.19093	0.0615114	0.589544
TSPAN12	-0.649694	-0.65213	3.11058	0.0615815	0.589544
ENTPD5	0.425897	0.426339	4.82442	0.0615827	0.589544
FLAD1	0.446718	0.447333	4.42176	0.0616111	0.589544
ARL2BP	-0.37314	-0.373303	5.92114	0.0616735	0.589669
LDOC1	-0.380494	-0.380751	5.6489	0.0618918	0.590374
FAR1	0.356404	0.356517	6.78561	0.0618994	0.590374
HPSE	-0.869793	-0.875041	1.73351	0.0619	0.590374
PQLC1	-0.418928	-0.419318	5.08028	0.0619446	0.590374
MRPS22	0.418012	0.418514	4.74851	0.0623779	0.59403
ATXN7L2	0.879937	0.886994	2.28357	0.062475	0.594103
MYL9	0.328965	0.329011	7.81855	0.0624849	0.594103
OLMALINC	0.879118	0.886226	2.07919	0.0627824	0.596146
C20orf27	0.405101	0.405526	5.20834	0.0627994	0.596146
ZBTB33	-0.412484	-0.412874	4.83915	0.0628849	0.596484
ARHGAP25	0.584105	0.585588	3.16177	0.0631314	0.598348
WDR24	-0.575234	-0.576559	3.57048	0.0633154	0.599352
ZNF486	0.94951	0.959806	1.97734	0.0633421	0.599352
STAT4	-1.06397	-1.0771	1.08527	0.0634322	0.599352
LRFN4	-0.446206	-0.446872	4.62594	0.0634395	0.599352
PLPBP	-0.391188	-0.391478	5.23566	0.0634879	0.599352
NUDCD1	-0.377236	-0.377458	5.71892	0.0636271	0.599777
CTF1	0.606509	0.60842	3.29912	0.0636332	0.599777
ZNF460	0.960288	0.967061	1.99554	0.0638138	0.600424
TARSL2	-0.477742	-0.478625	4.04966	0.0638355	0.600424
C14orf132	0.407601	0.408156	5.34146	0.0638525	0.600424
WDR66	-0.342426	-0.342519	6.7742	0.0640237	0.601561
KDSR	-0.335675	-0.335736	7.16131	0.0641284	0.601786
AMT	0.764825	0.768217	2.68064	0.0641498	0.601786
NRG1	-0.728152	-0.73301	3.15585	0.0641986	0.601786
GAS1	1.21217	1.25138	3.19813	0.0642903	0.602174
ABCA13	1.1381	1.16343	3.39123	0.0643454	0.602218
ZNF823	1.60083	1.67407	1.39169	0.0644647	0.602864
TWIST2	0.665273	0.668142	3.30527	0.0646008	0.60366
PXDC1	-0.37246	-0.372667	5.69675	0.0647141	0.60366
ZNF41	0.572985	0.574589	3.54064	0.0647511	0.60366
GEMIN2	0.817302	0.823219	2.35123	0.0647518	0.60366
ABHD5	-0.423574	-0.424216	5.16869	0.0648429	0.604039
SOX4	1.05238	1.06612	1.95783	0.0649192	0.604279
TPM1	0.31501	0.315023	9.39044	0.0650228	0.604656
PAAF1	-0.464423	-0.465207	4.07759	0.0650608	0.604656
ZNF652	-0.470593	-0.471394	4.25811	0.0656124	0.609309
PRR11	-0.439873	-0.440948	5.87133	0.0658543	0.61108
ARHGAP31	0.404063	0.404479	5.62693	0.0660563	0.61248
PABPC1L	0.383335	0.383586	5.39976	0.0662935	0.614203
ARHGAP19	0.497627	0.498662	4.18358	0.06635	0.614251
PMEPA1	0.431663	0.432257	5.02309	0.0667308	0.6172
ALPL	1.59797	1.67118	1.25005	0.0667717	0.6172
SVIL	0.518647	0.520127	3.79831	0.0668914	0.617828
THUMPD2	-0.519551	-0.520802	3.5144	0.0669583	0.617969
XRCC3	-0.472681	-0.473891	4.57934	0.067224	0.619943
MED27	0.499434	0.500678	3.98229	0.067287	0.620046
GBP2	-0.490492	-0.490936	4.34374	0.0675267	0.621479
SORT1	0.397947	0.398325	6.00886	0.0675642	0.621479
DYNLT1	-0.356438	-0.35659	6.16114	0.0675983	0.621479
TAF3	-0.423016	-0.423435	4.76632	0.0678351	0.62287
CRLS1	-0.383727	-0.383981	5.35116	0.0679082	0.62287
EMP2	0.40279	0.403254	5.80301	0.0679691	0.62287
MINOS1	0.644264	0.646946	3.05769	0.0680018	0.62287
PQLC2	-0.467128	-0.467958	4.23381	0.0680253	0.62287
KIF1BP	-0.372238	-0.372535	5.84808	0.0681132	0.62287
SEC13	-0.332183	-0.332249	7.28019	0.0681142	0.62287
RGS7	-3.5038	-1.44269e+08	0.467862	0.0684845	0.624459
ACOT13	-0.487814	-0.4888	3.88946	0.0684947	0.624459
ATP6V1E2	1.35484	1.39679	1.55491	0.0685491	0.624459
CTNNBIP1	-0.574291	-0.575557	3.99631	0.0685949	0.624459
KCNIP4	1.34936	1.38293	0.861367	0.0686164	0.624459
GPR3	-0.88626	-0.892342	2.1661	0.0686363	0.624459
RPAP2	0.46002	0.460825	4.43868	0.0686622	0.624459
PDE2A	-0.876275	-0.88088	1.76113	0.0687056	0.624459
FOXK2	-0.346625	-0.346727	6.45849	0.0688451	0.625251
2020-09-05	0.402289	0.402703	4.98342	0.0689287	0.625535
MRPL50	0.468643	0.469461	4.23499	0.0691072	0.626681
GCLC	-0.42647	-0.426874	5.03665	0.0691668	0.626693
DRD4	-1.58855	-1.6494	0.719888	0.0692589	0.626693
ZNF710	-0.447454	-0.44816	4.59921	0.0692657	0.626693
MIR181A2HG	0.989889	0.999441	1.70481	0.0694635	0.627885
ZDHHC4	-0.431515	-0.432033	4.50507	0.0695025	0.627885
MTFR2	-1.74254	-1.86745	1.77701	0.0696011	0.628301
APOBEC3G	1.02138	1.03149	1.4637	0.0698296	0.629654
PPARG	-0.633554	-0.63576	3.09736	0.069889	0.629654
ACVRL1	1.04685	1.05936	0.953244	0.0699089	0.629654
CDH24	-0.445194	-0.445862	4.32163	0.0699687	0.629718
ZNF112	0.80878	0.812706	2.50206	0.0702269	0.631567
HDAC9	-0.443273	-0.443739	4.28276	0.0704574	0.633164
IFITM10	0.817413	0.822027	2.07637	0.0706173	0.634124
AQP11	-1.09922	-1.11564	1.08709	0.0707568	0.634901
C19orf48	-0.468491	-0.469424	4.6754	0.0709158	0.635044
NBEAL1	0.365282	0.365436	6.15121	0.0709209	0.635044
SLC15A3	-0.462989	-0.463513	4.08812	0.070964	0.635044
DLGAP1-AS1	0.882029	0.889339	1.97197	0.0710674	0.635044
KCNJ2	-0.584209	-0.586352	3.2362	0.0711423	0.635044
POLR1B	0.401097	0.401438	4.97583	0.0711825	0.635044
ENC1	0.383072	0.38332	5.25657	0.0711856	0.635044
NOD1	0.842528	0.848658	2.38587	0.0712314	0.635044
ARL15	0.461	0.461858	4.11751	0.0712909	0.635044
KREMEN1	0.569271	0.570973	3.66431	0.0713117	0.635044
COX7A2L	-0.337235	-0.337317	6.75549	0.0713569	0.635044
PCDHGB3	0.951388	0.959335	1.83951	0.0717713	0.637814
ZC3H10	-1.13744	-1.15425	1.59099	0.0718131	0.637814
FAM86GP	1.08609	1.1025	1.31964	0.0718281	0.637814
SPOCD1	0.459807	0.460438	4.53862	0.0720696	0.639199
TMEM246	-0.448404	-0.449148	4.22154	0.072121	0.639199
SAE1	-0.336232	-0.336333	7.0534	0.0721659	0.639199
IER3	-0.525344	-0.526823	3.48631	0.072255	0.639199
MKLN1	0.350521	0.350635	6.25116	0.0722841	0.639199
SDF2	-0.388621	-0.388882	5.26001	0.0723051	0.639199
SRP14-AS1	1.06755	1.08207	1.1905	0.0723889	0.639199
FGF2	0.335952	0.33603	7.13131	0.0724375	0.639199
SLC29A4	0.897992	0.904453	1.65499	0.072576	0.639199
NDNF	-0.44504	-0.44585	4.69014	0.0725802	0.639199
MAPKAPK5	-0.41143	-0.4119	4.68635	0.0726271	0.639199
ABLIM1	-0.822516	-0.828706	2.25063	0.0726518	0.639199
ZNF224	-0.953701	-0.96265	1.67681	0.0726788	0.639199
FANCF	0.69789	0.701582	2.88974	0.0728084	0.639868
CDC6	-0.785495	-0.795632	4.70339	0.0730436	0.641465
LUC7L	0.377394	0.377656	5.35565	0.0731219	0.641681
KRT34	-0.377117	-0.377384	5.42089	0.073192	0.641825
IER3IP1	-0.394798	-0.395075	5.39076	0.0733717	0.64293
NPIPB3	-0.750959	-0.75484	2.37123	0.0734581	0.643215
CDA	0.524204	0.525667	3.58968	0.0735907	0.643332
IRF2BP1	-0.398053	-0.398382	4.9596	0.0736291	0.643332
DNAJB6	0.337257	0.337373	6.89137	0.0736328	0.643332
ARL5B	-0.362366	-0.362507	5.80211	0.0738781	0.645005
LONRF1	-0.432129	-0.43255	4.52366	0.0739495	0.645157
GRAMD1A	-0.34427	-0.344363	6.45877	0.07428	0.646833
TIMM10B	0.418344	0.418842	4.64105	0.0743373	0.646833
SHCBP1	-0.573215	-0.577204	5.60691	0.0743627	0.646833
CRIM1-DT	-1.10907	-1.12476	1.65794	0.0744025	0.646833
IL23R	0.860417	0.864507	1.86332	0.074412	0.646833
FIBP	0.394368	0.394708	5.34999	0.074613	0.648109
SEPHS1	0.399237	0.399816	5.1764	0.0747776	0.648358
TCTN2	-0.554055	-0.55591	3.7655	0.0748014	0.648358
MTSS1L	-0.436873	-0.437506	4.16485	0.0748469	0.648358
ZNF254	0.677671	0.680452	2.91048	0.0748585	0.648358
ZNF532	0.338967	0.339066	6.56498	0.0750077	0.648533
PSME1	-0.345255	-0.345357	6.49387	0.0750115	0.648533
POC5	0.610221	0.612473	3.1307	0.0751018	0.648533
ABCB8	0.379506	0.379731	5.70875	0.0751227	0.648533
GSTA4	0.496923	0.498027	3.66852	0.0751498	0.648533
SEMA6C	0.783382	0.787239	2.49212	0.0754327	0.650317
TMEM43	0.330187	0.330273	6.98869	0.0755726	0.650317
IFT20	-0.429215	-0.429737	4.35653	0.075614	0.650317
ZWILCH	-0.487977	-0.489635	4.70857	0.0756608	0.650317
CTBP1-DT	0.564791	0.566996	3.5901	0.075681	0.650317
SLC1A3	-0.997902	-1.00818	1.71324	0.0758924	0.650317
RIOK2	-0.404365	-0.404768	4.84315	0.075902	0.650317
HNRNPA1P48	1.00002	1.0121	1.9395	0.0759598	0.650317
CHEK1	0.405137	0.405567	5.20443	0.075966	0.650317
SHTN1	-0.415566	-0.416218	4.68835	0.0760067	0.650317
MAGEF1	0.472119	0.472943	3.79883	0.076048	0.650317
ZBTB5	-0.518711	-0.520103	3.47609	0.076087	0.650317
LIFR	-0.448544	-0.449155	4.56109	0.0760881	0.650317
NPIPA5	-0.858097	-0.86468	1.95126	0.0761177	0.650317
ARHGAP44	1.4267	1.48442	1.12368	0.0764297	0.65182
TRPC5	-1.29385	-1.32646	0.530129	0.076457	0.65182
TBC1D12	-0.443495	-0.444158	4.42797	0.0764859	0.65182
GTSE1	-0.644002	-0.650088	5.17134	0.0766035	0.65182
SRGN	-0.310294	-0.310308	9.1265	0.0766159	0.65182
TPRN	-0.460216	-0.460812	4.39258	0.0766206	0.65182
CNPY2	0.684106	0.687499	2.52668	0.0767993	0.652876
SRSF2	0.342098	0.342228	6.90411	0.0769372	0.653583
TREX1	-0.674545	-0.678132	2.96158	0.07704	0.653988
TRNAU1AP	-0.519521	-0.52101	3.83831	0.0771291	0.653988
C11orf74	-0.684736	-0.687891	2.75735	0.0772282	0.653988
POT1-AS1	1.61938	1.71061	0.812032	0.0773192	0.653988
AGL	0.370755	0.370969	5.54698	0.0773535	0.653988
CHMP6	0.552727	0.554221	3.67765	0.077379	0.653988
DNAJC11	0.392523	0.392904	5.26033	0.0774152	0.653988
ORC1	-1.48876	-1.57598	2.75049	0.0774791	0.653988
EDNRB	-1.16093	-1.18862	2.06263	0.0774849	0.653988
NPR2	-0.373939	-0.374169	5.42333	0.0775531	0.653988
ENOX1	-0.433167	-0.433568	4.41638	0.0775862	0.653988
NRXN1	-1.02985	-1.04076	1.07607	0.077755	0.654949
TRMT5	-0.51358	-0.514971	4.14145	0.0778719	0.655349
TNFRSF10D	0.32207	0.322116	7.83978	0.0779521	0.655349
PCDHB9	1.01764	1.02892	1.45878	0.0779668	0.655349
C11orf91	1.70408	1.79814	0.895424	0.0782469	0.657241
PLA2G16	-0.589584	-0.591337	3.30233	0.0784969	0.658878
CDC123	0.371631	0.371857	5.67249	0.0787255	0.660333
PDGFA	-0.339318	-0.339406	6.28397	0.0788179	0.660645
DEPP1	0.518365	0.519982	3.67208	0.0789117	0.660969
CYP2U1	-0.377938	-0.378215	5.237	0.0790594	0.661742
SERTAD4	-3.12456	-1.44269e+08	0.85976	0.0791988	0.662299
TMEM200A	-0.379466	-0.37981	5.77033	0.0792366	0.662299
TAF6L	0.570933	0.573146	3.33825	0.0793684	0.66281
UBA6-AS1	0.783083	0.788053	2.23805	0.0794086	0.66281
COBLL1	-0.373373	-0.37369	5.39673	0.0796236	0.664141
EHBP1L1	0.337854	0.337956	6.89907	0.0797789	0.6646
TGFBR3L	-1.0125	-1.02652	1.8775	0.0798429	0.6646
PHF19	-0.395927	-0.396485	5.2719	0.0798453	0.6646
CAMLG	-0.362831	-0.363056	5.55729	0.0800217	0.665296
IFIH1	-0.385801	-0.386022	4.75448	0.0800803	0.665296
SLC25A45	1.20945	1.23807	1.03153	0.0800959	0.665296
NOL10	0.398699	0.399132	4.92167	0.0801811	0.665542
CASP4	-0.328508	-0.328562	6.89856	0.0804537	0.667193
BAIAP2-DT	0.469484	0.470439	3.83295	0.0804915	0.667193
STAC	-0.427136	-0.427576	4.42871	0.0805806	0.667227
ALDH4A1	0.718692	0.723555	2.67382	0.0806072	0.667227
EXO1	-0.921986	-0.940711	3.41219	0.0807755	0.668157
CDKL5	0.749092	0.754026	2.22891	0.0808347	0.668186
C3orf62	0.596857	0.599288	3.07934	0.080984	0.668957
EPHA2	-0.317954	-0.317988	7.8301	0.0811281	0.669541
PIK3CB	-0.37637	-0.376637	5.47369	0.0812427	0.669541
AKR1C1	-1.1569	-1.17598	1.00477	0.0812674	0.669541
RRP9	-0.445994	-0.446755	4.27728	0.0812786	0.669541
ZNF137P	-1.58875	-1.66157	0.885937	0.0814489	0.670341
KBTBD4	0.950014	0.96347	2.1525	0.0814878	0.670341
KRT18	0.326911	0.32701	7.29069	0.081676	0.671427
KRT86	1.71608	1.81024	0.811139	0.0817949	0.671943
ERLEC1	-0.32528	-0.325338	7.15217	0.0818671	0.672074
C8orf48	1.49527	1.5547	1.15767	0.0822028	0.674367
OFCC1	3.13148	1.44269e+08	1.44507	0.0822981	0.674564
NUDT17	1.09746	1.11306	1.59247	0.0823882	0.674564
INTS4	-0.429587	-0.430247	4.48606	0.0824336	0.674564
PLAC9	0.61515	0.617221	2.79945	0.0824653	0.674564
LRP6	0.345525	0.345663	6.2869	0.0825088	0.674564
MACROD2	-1.37291	-1.41047	0.480375	0.082748	0.675448
ZNF613	1.05398	1.06919	1.35897	0.0827612	0.675448
KLHDC8B	-0.647599	-0.650547	2.8757	0.0827863	0.675448
ZNF746	-0.408289	-0.4088	4.6752	0.0831666	0.6778
CARD8	0.429468	0.43011	4.42282	0.0831878	0.6778
ABCB6	1.08734	1.10995	1.29682	0.0832613	0.677863
TEX2	0.372254	0.372563	5.44407	0.0833502	0.677863
TMEM79	0.793827	0.799896	2.09679	0.0835204	0.677863
C17orf75	-0.459231	-0.460193	3.99114	0.0835374	0.677863
ANKS6	-0.365213	-0.365445	5.57902	0.0835549	0.677863
HIRIP3	-0.631524	-0.636605	3.63946	0.083639	0.677863
NUDT13	1.13442	1.1597	1.54794	0.0836421	0.677863
DNASE2	-0.364174	-0.364385	5.28938	0.083649	0.677863
SECTM1	-0.352257	-0.352424	6.12853	0.0838191	0.67872
RANBP1	-0.351708	-0.351894	6.53266	0.0838723	0.67872
SURF1	-0.428677	-0.429345	4.3082	0.083925	0.67872
TLE3	-0.435216	-0.43608	4.45946	0.0843701	0.68167
GKAP1	-1.04132	-1.05431	0.982667	0.0844038	0.68167
DECR2	0.474972	0.4762	3.69567	0.0846423	0.683135
FAM50B	0.658556	0.661306	2.77364	0.0848027	0.683894
MAT2A	0.314845	0.314885	7.9112	0.0848507	0.683894
CDKN1B	-0.350581	-0.3508	5.77513	0.0853097	0.686631
NEURL1B	-1.2685	-1.3218	2.55856	0.0853551	0.686631
ANKRD36C	0.665454	0.668749	3.20011	0.0854951	0.686631
DPF1	-0.879572	-0.890638	2.38604	0.0855381	0.686631
SPTB	0.874302	0.880663	1.59439	0.0855692	0.686631
MIR29B2CHG	0.495844	0.497001	3.54037	0.0856061	0.686631
NEXN-AS1	0.951555	0.9657	2.19364	0.0856288	0.686631
PLXNB1	0.483479	0.48423	3.91658	0.0857128	0.686631
TRAPPC10	-0.342305	-0.342436	6.19624	0.0857667	0.686631
ALDH1A3	1.2761	1.30873	0.672483	0.0857843	0.686631
DDX55	0.440163	0.440996	4.28722	0.0858217	0.686631
PLEKHA7	0.362835	0.363162	6.00473	0.0858955	0.686762
PTOV1-AS1	0.594413	0.596752	3.06126	0.0859598	0.686817
GULP1	-0.391764	-0.392223	4.96786	0.0861898	0.687898
SMCO4	-0.634384	-0.637019	2.68832	0.0862645	0.687898
LGALS3BP	-0.310675	-0.31069	8.66041	0.0863219	0.687898
MYNN	-0.462063	-0.463161	3.86172	0.0863251	0.687898
PDIA5	-0.358495	-0.358673	5.55886	0.0864184	0.688183
NFKBIE	-0.467774	-0.46857	3.77811	0.0866658	0.689216
ZNF383	0.804559	0.810096	1.96021	0.0867192	0.689216
ATR	0.346304	0.346455	6.02816	0.086721	0.689216
TRIM35	0.3997	0.400089	4.84724	0.0867817	0.68924
MMD	-0.414019	-0.41457	4.44571	0.0868565	0.689376
TOP1MT	-0.468258	-0.469254	3.96772	0.0869168	0.689398
PDE6D	-0.419901	-0.420473	4.4987	0.0871592	0.690855
ZNF776	0.668784	0.672306	3.00886	0.0872161	0.690855
ADAMTS2	0.338232	0.338365	6.48885	0.087367	0.691415
LINC00370	1.62449	1.71576	1.18669	0.0874023	0.691415
RPS3AP38	-0.919938	-0.92961	1.68507	0.0875896	0.692438
CCDC97	0.501886	0.503396	4.06077	0.0876795	0.692456
CYB561D2	-0.499819	-0.501016	3.44688	0.0877076	0.692456
PDCL	-0.380437	-0.380821	5.011	0.0878141	0.692545
YEATS4	0.518981	0.520668	3.57114	0.0878507	0.692545
ZNF75D	-0.520801	-0.522408	3.45837	0.0878926	0.692545
HSPD1P6	-0.540015	-0.541034	3.18353	0.0881163	0.69385
CTSS	-0.43406	-0.434568	3.94133	0.088437	0.695791
PTRH2	-0.561906	-0.563919	3.19884	0.0884836	0.695791
SULT1B1	-3.13092	-1.44269e+08	0.659154	0.0885372	0.695791
DPY19L2P2	2.42866	2.82392	0.721007	0.0886006	0.695832
CAPN15	-0.33819	-0.338317	6.17213	0.0886884	0.696064
PRKCE	-0.421314	-0.421915	4.21609	0.0889011	0.697132
EMC8	-0.387192	-0.387668	4.83248	0.088941	0.697132
CHTF18	-0.6251	-0.629466	4.02689	0.089283	0.699354
PFKFB3	-0.387451	-0.388038	5.54773	0.0894209	0.699976
FSTL3	-0.30946	-0.309479	8.64969	0.0896506	0.700938
SEZ6L2	0.877567	0.884636	1.45287	0.089661	0.700938
SLC2A3	-0.337114	-0.337221	6.25389	0.0897478	0.701158
PPWD1	0.382385	0.382783	4.87613	0.0898443	0.701267
GLYCTK	0.978341	0.99209	1.69223	0.0898952	0.701267
BIRC5	-0.720716	-0.728843	4.1259	0.0899376	0.701267
ASTN2	0.954004	0.961972	1.63135	0.0901202	0.702233
FITM2	0.386517	0.386946	4.81697	0.0901848	0.702279
FRY	0.729513	0.734228	2.32298	0.0902744	0.702519
ARHGEF18	-0.384507	-0.384904	5.02667	0.09045	0.702905
PEX11B	0.394665	0.395167	4.65695	0.0905035	0.702905
TPD52L1	0.651914	0.654713	2.56765	0.0905908	0.702905
CHMP5	-0.329862	-0.329953	6.50087	0.0906825	0.702905
FAAP24	1.40657	1.45536	1.17685	0.0907213	0.702905
ARHGEF37	1.15311	1.17356	0.786179	0.0907273	0.702905
NCOA5	0.377001	0.377392	5.20793	0.0907353	0.702905
DISP1	0.60275	0.604666	3.01056	0.0909302	0.703959
MSANTD2	-0.463722	-0.464709	4.15532	0.0910059	0.704089
NEIL3	-1.23096	-1.276	2.96977	0.0915249	0.706989
2020-03-04	-0.337672	-0.337848	6.49918	0.0915961	0.706989
PSG5	0.318033	0.318097	7.93259	0.0916702	0.706989
ELP3	0.379129	0.379485	4.94394	0.0916811	0.706989
C1orf54	0.55104	0.55278	3.18254	0.0916974	0.706989
LINC00702	3.13747	1.44269e+08	0.274376	0.0917354	0.706989
PYCR3	0.541709	0.543699	3.56204	0.0918431	0.707363
MUC19	-0.85742	-0.864732	1.74078	0.0919477	0.707544
DPY30	-0.378092	-0.378483	5.05592	0.0919848	0.707544
ZNF248	0.45745	0.458406	3.75339	0.092076	0.70779
ZNF134	0.438485	0.439283	4.01808	0.0922111	0.707971
ZNF674	0.762227	0.767236	2.35695	0.0922304	0.707971
CHMP4C	0.587827	0.589705	3.08426	0.0922771	0.707971
MFSD10	-0.341756	-0.34191	6.20669	0.0925884	0.709306
RPL13AP20	-1.51278	-1.58345	1.07888	0.0926738	0.709306
ZBTB43	0.42753	0.428161	4.31802	0.0926809	0.709306
CKB	-1.08596	-1.1054	1.67581	0.0927166	0.709306
CRLF1	-0.762265	-0.766023	1.94627	0.0927476	0.709306
ALDH18A1	-0.322941	-0.323013	6.88728	0.0928162	0.709376
EHHADH	0.400812	0.401171	4.67452	0.0929088	0.709607
GATC	0.419684	0.420343	4.40228	0.092965	0.709607
ZNF25	-0.414839	-0.415369	4.5154	0.0930987	0.710175
CPLANE1	0.347469	0.347645	5.80245	0.0931672	0.710244
B3GLCT	0.507445	0.509138	3.76969	0.093294	0.710529
NLRP3	-0.726811	-0.732931	2.6858	0.0933234	0.710529
RBM48	0.457763	0.458674	3.84035	0.0935321	0.711515
ZNF544	0.449743	0.450773	4.11717	0.0935873	0.711515
C22orf23	-0.371884	-0.37219	4.95084	0.0936313	0.711515
S100A4	1.13595	1.1519	1.51855	0.094053	0.714266
MID1	-0.422756	-0.423713	4.7355	0.0941239	0.71435
LINC00667	0.495775	0.496912	3.75808	0.0942031	0.714498
TRIM26	0.590863	0.593222	3.22692	0.0942821	0.714568
SIRT7	0.424145	0.424724	4.45259	0.0943319	0.714568
TMEM240	-1.18884	-1.21474	1.33619	0.0944153	0.714606
LIN9	-0.985878	-1.00412	2.19058	0.0944564	0.714606
RRNAD1	-0.443107	-0.44389	3.89071	0.0948149	0.714619
TLNRD1	-0.353782	-0.354044	5.45985	0.0948338	0.714619
C4orf46	0.554102	0.556588	3.90375	0.0948526	0.714619
STON1	0.676257	0.680396	3.352	0.0949984	0.714619
PRDM15	0.600091	0.602704	3.23244	0.0950138	0.714619
PTPN22	1.2531	1.28244	0.807921	0.0950227	0.714619
BIN3	0.461303	0.46224	3.94659	0.0950787	0.714619
PIGH	-0.751455	-0.756185	2.25581	0.0951294	0.714619
TGFBR3	-0.412051	-0.412899	4.51407	0.0952524	0.714619
ACSL5	0.973508	0.984959	1.0962	0.0952682	0.714619
MINDY3	0.358369	0.358596	5.43366	0.0953384	0.714619
COG8	0.421983	0.422692	4.01202	0.0953851	0.714619
ZEB1	0.337403	0.337539	6.23213	0.095405	0.714619
PPIL2	0.364629	0.364943	5.36619	0.0954684	0.714619
MTMR11	0.345212	0.34535	5.54156	0.0955217	0.714619
RAP1GAP	-1.00598	-1.01629	0.860688	0.0955287	0.714619
PRELID2	-0.75293	-0.757848	2.04796	0.0955692	0.714619
CRBN	0.39792	0.398432	4.38947	0.0956111	0.714619
ACCS	0.425507	0.426148	4.2148	0.0956855	0.714619
KYAT1	-0.549673	-0.551736	3.33447	0.0956925	0.714619
ANK2	-0.456439	-0.457162	3.72557	0.0957127	0.714619
WWOX	-1.44675	-1.50434	0.894316	0.0960249	0.716284
THAP7	-0.478432	-0.479529	3.86033	0.0960555	0.716284
TMEM11	-0.397893	-0.398493	4.53638	0.0963862	0.718253
ZNF529	0.49898	0.500106	3.68839	0.0964396	0.718253
PET100	-0.837623	-0.846716	1.94866	0.0965233	0.718429
LRRK2	0.3177	0.317743	7.10864	0.0965884	0.718467
CBWD2	0.526505	0.528114	3.32858	0.0967122	0.71894
GSTP1	-0.311738	-0.311798	7.61063	0.0968453	0.719192
JTB	-0.328802	-0.328892	6.53497	0.0968663	0.719192
CCR10	0.55335	0.555029	3.20249	0.0970702	0.72007
ITSN2	-0.326864	-0.326969	6.36445	0.097105	0.72007
TASP1	0.60818	0.611048	2.95178	0.0973752	0.721626
C9orf85	0.535015	0.536671	3.23176	0.0974927	0.72205
RAI14	0.304421	0.304451	8.57891	0.0977297	0.723357
ZNF205	-0.544083	-0.545768	3.30162	0.097858	0.723858
MON1B	0.345524	0.345713	5.74719	0.0981463	0.725543
GOLGA8A	0.366795	0.367148	5.16263	0.0983721	0.726763
GLCE	-0.366683	-0.366939	5.34669	0.0986158	0.728113
SNN	-0.897252	-0.907549	1.8639	0.0987166	0.728408
CIAPIN1	0.36523	0.365556	5.12476	0.0988172	0.728701
TEFM	-0.652272	-0.656685	2.8366	0.0990144	0.729705
SUMF1	0.359245	0.359526	5.22204	0.0992127	0.730492
ERMN	3.13137	1.44269e+08	0.242316	0.0992433	0.730492
YPEL3	-0.369398	-0.369725	5.17341	0.0994169	0.730825
PITPNC1	0.528279	0.529702	3.84274	0.0995189	0.730825
CLUAP1	0.424977	0.425756	3.96861	0.0995212	0.730825
RXYLT1	0.396901	0.397416	4.50819	0.0995329	0.730825
FAM174A	-0.384648	-0.384978	4.69136	0.099717	0.731087
CADPS2	-0.377872	-0.37821	4.93539	0.0997225	0.731087
CLHC1	0.694068	0.697345	2.86994	0.0997872	0.731087
PLPP4	-0.70995	-0.715664	2.6329	0.0998355	0.731087
CBX7	-0.444699	-0.445313	4.06889	0.0999336	0.731087
RCBTB2	0.503502	0.504891	3.54016	0.100059	0.731087
KLHL28	-0.390151	-0.390538	4.49868	0.100101	0.731087
EXOSC1	-0.388914	-0.389342	4.5237	0.10011	0.731087
DAGLA	-0.4276	-0.428258	4.04869	0.100119	0.731087
LCORL	-0.421375	-0.422119	4.12984	0.100259	0.731379
RPL39L	-1.30748	-1.35426	0.731266	0.100337	0.731379
HARS	0.327853	0.327969	6.49992	0.100343	0.731379
KCNK2	0.327364	0.327477	6.34879	0.100406	0.731379
ILF3-DT	0.789432	0.796547	2.31759	0.100464	0.731379
CD27-AS1	0.44198	0.442793	3.85803	0.100714	0.732751
ADM2	-0.453801	-0.454361	3.50195	0.100893	0.732831
IPP	0.388757	0.389299	4.41398	0.100918	0.732831
MYOCD	1.49515	1.58283	2.67008	0.101051	0.732831
HLTF	-0.326275	-0.32636	6.67459	0.101056	0.732831
CRYL1	-0.467437	-0.468432	3.57179	0.101109	0.732831
PTGS2	-0.371579	-0.371802	4.85221	0.101184	0.732831
TRIM7	0.544571	0.546849	3.59795	0.101259	0.732831
TARS2	0.436591	0.437277	4.39464	0.101263	0.732831
FAM110A	-0.721928	-0.728033	2.50042	0.101295	0.732831
RGS19	-0.449384	-0.450441	3.92194	0.101338	0.732831
POLE	-0.45662	-0.457914	5.06289	0.101468	0.733328
DYNC2H1	0.324157	0.324255	6.4855	0.101669	0.733769
BBS12	0.561167	0.563313	2.94079	0.101705	0.733769
GTF2B	-0.396309	-0.396837	4.37813	0.101713	0.733769
ZNF358	-0.387778	-0.388276	4.61245	0.101895	0.73464
ZNF862	0.589626	0.591797	2.90267	0.102478	0.738399
PARL	0.389379	0.389902	4.59642	0.102548	0.738458
C11orf80	-0.824202	-0.832285	1.99051	0.102748	0.739452
GPAT3	-0.435131	-0.435865	3.78931	0.102889	0.740019
LINC02056	-1.01739	-1.03302	2.41134	0.103002	0.740388
PGM3	-0.317349	-0.317414	7.03907	0.103086	0.74055
SH3RF1	-0.318093	-0.318179	7.0627	0.103302	0.740844
SCPEP1	-0.336867	-0.337046	5.76357	0.103346	0.740844
CTTNBP2NL	0.328801	0.328909	6.59053	0.103368	0.740844
TNFSF4	-0.473547	-0.474985	4.28856	0.103405	0.740844
DGUOK	-0.376572	-0.376969	4.80913	0.103469	0.740844
KDELR2	-0.301787	-0.301806	8.81628	0.103499	0.740844
SNX16	-0.452498	-0.453282	3.72389	0.103586	0.741022
ACTR5	0.643646	0.646849	2.89543	0.103648	0.741022
PCSK7	0.329089	0.329211	6.58199	0.104115	0.743294
CEP250	-0.363032	-0.363342	5.44148	0.104146	0.743294
BTBD19	0.362334	0.362651	5.10612	0.104165	0.743294
TRPC6	0.973468	0.989612	1.4239	0.104214	0.743294
ABI1	0.33313	0.333315	6.03875	0.104318	0.743592
TTC5	0.398558	0.399237	4.40099	0.10443	0.743946
ASB8	0.404895	0.405597	4.46136	0.104538	0.744272
CLMP	0.349393	0.349623	5.50574	0.104603	0.744295
MYO10	0.330538	0.330687	6.38071	0.104898	0.74578
TCTEX1D4	0.889661	0.897967	2.0242	0.104986	0.74578
RNF227	0.675421	0.678741	2.66564	0.105035	0.74578
HOXB-AS1	1.1173	1.14433	1.08587	0.10507	0.74578
PAX8	0.565406	0.56763	2.96614	0.105165	0.74578
TMEM9	-0.349537	-0.349776	5.28876	0.105242	0.74578
UNC5B	0.366266	0.366486	4.71362	0.105248	0.74578
CEP57L1	0.373384	0.373791	4.67607	0.105557	0.747524
GM2A	-0.356218	-0.356472	5.34756	0.106001	0.747584
ILK	1.14826	1.17601	1.21695	0.106059	0.747584
A4GALT	0.371922	0.372234	4.80823	0.106171	0.747584
TMED1	-0.480771	-0.481871	3.68309	0.106172	0.747584
LIMK2	0.348813	0.349061	5.35084	0.106198	0.747584
TIAM2	-0.769999	-0.777189	2.3501	0.106198	0.747584
EXOG	0.418278	0.419165	4.22285	0.106202	0.747584
CBARP	-0.405271	-0.405849	4.09331	0.106229	0.747584
WIPI1	-0.325937	-0.326042	6.31759	0.106265	0.747584
B9D2	1.00478	1.02208	1.53578	0.106295	0.747584
GALNT3	-0.508985	-0.510113	3.75463	0.106401	0.747584
CA5B	0.618164	0.621452	2.60331	0.106516	0.747584
DNAAF5	-0.368256	-0.368706	5.05506	0.106657	0.747584
ATAD5	-0.725151	-0.732476	2.86434	0.106759	0.747584
ENPEP	-0.344885	-0.345095	5.14519	0.10681	0.747584
GATAD2B	0.354416	0.354699	5.26054	0.106819	0.747584
PHPT1	-0.329796	-0.329947	5.8774	0.106891	0.747584
NCDN	0.333725	0.333857	5.9061	0.106986	0.747584
TMEM208	-0.40237	-0.402934	4.37586	0.107119	0.747584
PRKRA	-0.349675	-0.349893	5.30956	0.107121	0.747584
IL1R1	0.367223	0.367692	5.26342	0.107137	0.747584
BST2	-0.457446	-0.458015	3.42547	0.107141	0.747584
ZNF501	0.924173	0.935768	1.48091	0.107189	0.747584
NPM1P27	-0.903072	-0.911658	2.16733	0.107191	0.747584
KDELC1	-0.417283	-0.418019	3.98737	0.107198	0.747584
FANCL	-0.408247	-0.408836	4.16724	0.107255	0.747584
RNF44	-0.37662	-0.376978	4.58309	0.107278	0.747584
CLCF1	0.937468	0.951306	2.57218	0.107483	0.747584
TCF4	0.313326	0.313387	6.88429	0.107534	0.747584
FBXL20	0.512817	0.514164	3.23416	0.107552	0.747584
TMEM183A	-0.364559	-0.364878	5.03396	0.107558	0.747584
TM6SF2	1.11355	1.13228	0.796116	0.107566	0.747584
ZNF600	0.591169	0.593569	2.91279	0.107838	0.749044
TEDC1	-0.895004	-0.90929	2.92876	0.108055	0.749324
FMNL1	0.8131	0.81893	1.49707	0.108067	0.749324
ZSWIM4	-0.459454	-0.460406	3.73577	0.108183	0.749324
ALG14	0.429609	0.430391	3.80939	0.10833	0.749324
FAM234A	-0.350812	-0.351007	5.58136	0.108366	0.749324
CAPRIN2	0.383842	0.384361	4.59403	0.108401	0.749324
TRIQK	0.465409	0.466334	3.68312	0.108466	0.749324
GATA6	1.00841	1.02602	1.54817	0.108587	0.749324
BCLAF3	0.50566	0.507245	3.37216	0.108606	0.749324
KIF24	0.979612	1.00446	2.62048	0.108616	0.749324
SCML2	-0.687258	-0.691663	2.45175	0.108638	0.749324
TNS2	0.32878	0.32894	6.54235	0.108658	0.749324
CYP51A1	0.486995	0.488987	3.8623	0.108693	0.749324
NIPAL2	0.332801	0.332961	5.81826	0.108915	0.750372
COMMD9	0.436051	0.436987	4.21453	0.109026	0.750372
RAD51B	-1.11817	-1.14119	1.31364	0.109033	0.750372
RPRD1A	-0.318594	-0.318673	6.73905	0.109135	0.750643
REPS2	-1.06982	-1.09216	0.732014	0.109211	0.750728
FAM107B	-0.310856	-0.310962	7.73852	0.109395	0.751562
NYAP1	-0.88483	-0.89505	1.64548	0.109534	0.751803
CHORDC1	0.342725	0.342943	5.68249	0.109586	0.751803
THAP8	-0.824937	-0.833579	2.08822	0.109701	0.751803
HSF4	0.734648	0.740185	2.27003	0.10976	0.751803
TRAPPC2	0.505233	0.506764	3.53914	0.10977	0.751803
SPRN	0.947972	0.960795	1.56272	0.109807	0.751803
BCAT2	-0.345515	-0.345745	5.34732	0.110028	0.752885
AARS2	-0.392345	-0.392822	4.61297	0.110416	0.755107
KLHL26	-0.593009	-0.595047	3.11163	0.110577	0.755776
GATD1	0.342843	0.343121	5.76359	0.110671	0.75599
PSMC3IP	-0.890107	-0.906046	2.99792	0.110767	0.756196
TMEM80	0.410569	0.411353	4.12538	0.110879	0.756196
ACSS1	-0.490733	-0.492186	3.39879	0.110891	0.756196
ERVK13-1	0.845987	0.857273	2.24931	0.111195	0.757718
ZNRF1	-0.611989	-0.61428	2.7635	0.111248	0.757718
OTUD6B	0.371236	0.371659	4.77126	0.111304	0.757718
CTIF	-0.311258	-0.311322	7.34717	0.111403	0.757959
AP3S1	-0.318706	-0.318798	6.7071	0.111641	0.759144
KLF16	-0.342086	-0.342316	5.45298	0.111736	0.759237
MINDY1	0.399357	0.400009	4.18361	0.111781	0.759237
VASH1-AS1	-1.08746	-1.10695	0.741149	0.111935	0.75985
PPP1R35	-0.500808	-0.502602	3.28352	0.112061	0.760276
ATAD3B	-0.404956	-0.405562	4.82621	0.112139	0.760368
NEK3	0.452564	0.453644	3.69833	0.112512	0.762467
WDR92	0.631263	0.634457	2.93433	0.112628	0.762791
TEX30	-0.489127	-0.490863	3.56912	0.112687	0.762791
PTGS1	0.313047	0.313139	7.21749	0.112858	0.763517
SSBP4	0.35571	0.356013	5.29702	0.11304	0.764312
DZIP1L	0.547212	0.549441	3.28317	0.113402	0.765698
VLDLR	-0.617693	-0.620421	2.61781	0.113427	0.765698
ASAH1	-0.311028	-0.311092	6.67846	0.113479	0.765698
CEP126	0.486038	0.487451	3.35414	0.113501	0.765698
NRAV	1.17016	1.20095	1.57384	0.113827	0.767318
SRRD	0.486201	0.487521	3.466	0.113869	0.767318
NR2F1	0.407758	0.408489	4.44906	0.114134	0.768565
WDR62	-0.736135	-0.746231	3.98951	0.114198	0.768565
RALGDS	-0.354995	-0.355232	5.11048	0.114347	0.768565
DBF4	-0.462896	-0.464132	4.0927	0.114453	0.768565
DRP2	1.25301	1.29844	1.37651	0.114458	0.768565
CAVIN3	0.330516	0.330729	6.82519	0.114507	0.768565
ATP6V0E2	0.858873	0.867183	1.56199	0.114523	0.768565
IL6	1.43223	1.50077	0.698299	0.114568	0.768565
GRK5	0.357765	0.358157	5.10565	0.114852	0.770039
FYN	-0.331038	-0.331199	6.24302	0.115104	0.771295
DHX9	0.306081	0.306152	7.43465	0.115264	0.771936
IGF2BP2	-0.30327	-0.303313	7.69712	0.115348	0.771949
HIF1A	0.295667	0.295685	8.97445	0.115395	0.771949
RBKS	1.47676	1.53488	0.584946	0.115521	0.772242
KIF17	-1.32107	-1.36797	0.917328	0.115568	0.772242
MOGS	-0.309106	-0.309164	6.90838	0.11584	0.773623
RPUSD2	-0.533759	-0.535488	3.29045	0.116053	0.774615
DDIT4	0.327727	0.327865	5.79014	0.116139	0.774758
DDHD1	0.381257	0.381695	4.56223	0.11629	0.775334
PTPN13	0.315404	0.315497	6.57123	0.116432	0.775842
SMURF2	-0.299978	-0.300017	8.24751	0.116643	0.776406
PLSCR1	-0.328166	-0.328274	5.90717	0.116646	0.776406
TTC30A	0.786915	0.793424	2.37262	0.116895	0.777348
RNF19B	-0.385882	-0.386389	4.17584	0.116917	0.777348
MAD2L2	-0.357473	-0.357822	4.88214	0.117168	0.778293
HSF2	-0.39712	-0.397811	4.12408	0.1172	0.778293
FAM102A	-0.368963	-0.369326	4.46452	0.117255	0.778293
IL32	-0.403014	-0.403619	3.84503	0.11755	0.779284
MTHFSD	-0.439178	-0.440263	3.74218	0.117555	0.779284
ZNF37A	0.374229	0.374611	4.87721	0.117723	0.779284
NEK11	1.04975	1.07173	1.02114	0.117756	0.779284
L2HGDH	-0.670056	-0.673633	2.64027	0.117763	0.779284
MRPS17	-0.98289	-1.00239	1.78604	0.117832	0.779284
MED28	-0.340525	-0.340745	5.49475	0.117929	0.779284
SYNM	0.337189	0.33735	5.4511	0.118051	0.779284
CEP68	-0.419043	-0.419987	3.87613	0.118081	0.779284
SIPA1L1	0.304928	0.304998	7.45044	0.11811	0.779284
PTPN21	-0.333505	-0.3337	6.06846	0.118165	0.779284
ZNF100	1.06849	1.09458	1.79251	0.118186	0.779284
MCL1	0.296751	0.296772	8.73749	0.118426	0.78012
IGDCC4	0.680305	0.683438	1.93795	0.118443	0.78012
AGGF1	0.341409	0.34164	5.38665	0.118543	0.780171
NUPL2	0.392435	0.393115	4.21855	0.118583	0.780171
PTMS	0.309216	0.309248	8.66461	0.118646	0.780171
SPATA7	0.638991	0.642264	2.4595	0.118724	0.780254
PLA2R1	0.485854	0.487315	3.39555	0.118951	0.780934
PLEKHM2	-0.309732	-0.309795	6.97802	0.119	0.780934
PELI1	-0.385888	-0.38628	4.1564	0.119024	0.780934
PTCHD4	0.422376	0.423004	3.78319	0.11917	0.78114
TMED9	-0.29973	-0.299759	8.14963	0.119238	0.78114
SPAG1	-0.597764	-0.601057	2.90146	0.119251	0.78114
LAMTOR2	-0.365465	-0.365872	4.73063	0.119459	0.781567
IRF2	-0.379323	-0.379763	4.46229	0.119459	0.781567
WASHC1	-0.815403	-0.825849	2.10515	0.119586	0.781567
ERBB4	-1.01828	-1.03583	1.17453	0.119658	0.781567
EFNA4	-1.07691	-1.09933	0.934827	0.119701	0.781567
TCHP	0.366843	0.36736	5.08846	0.119739	0.781567
NREP	0.369465	0.370297	5.61606	0.119837	0.781567
RFTN2	-0.554476	-0.556618	2.952	0.119896	0.781567
FOXO3	-0.310721	-0.310796	7.37858	0.119904	0.781567
WNT3	-0.491457	-0.492907	3.38293	0.120069	0.781999
DAB2	-0.31663	-0.316714	6.60342	0.120186	0.781999
DUS2	0.55168	0.553971	3.3206	0.120299	0.781999
RBP5	0.678675	0.682543	2.33582	0.120315	0.781999
PRDM5	-0.498693	-0.500643	3.30959	0.120316	0.781999
SCML1	-0.378787	-0.379315	4.58652	0.120363	0.781999
RADX	0.800859	0.808289	1.90558	0.120507	0.782317
BMPR1B	-1.20082	-1.23973	1.27248	0.120543	0.782317
PTGES	0.656007	0.659372	2.57165	0.120763	0.78304
SAT1	-0.311827	-0.311904	6.46351	0.120809	0.78304
TXNL4A	-0.323889	-0.324049	5.94219	0.12085	0.78304
DDX5	0.290648	0.290659	9.58738	0.121073	0.784054
ERFE	0.855168	0.86345	1.80961	0.121225	0.784615
GSKIP	0.33612	0.33632	5.26078	0.121339	0.784933
FAM173A	0.369819	0.370329	4.63737	0.121423	0.78505
MFSD8	0.414425	0.415314	3.94405	0.121509	0.785182
SETD6	-0.592068	-0.595467	2.90962	0.121647	0.785649
RELT	-0.523507	-0.525192	3.08861	0.121793	0.786162
DPH2	-0.406042	-0.406694	4.17838	0.121858	0.786162
TNK2	-0.331335	-0.33152	5.83608	0.122028	0.786421
CENPM	-1.37899	-1.46217	2.56838	0.122094	0.786421
MALSU1	-0.38071	-0.381299	4.47284	0.12213	0.786421
AJUBA	-0.302507	-0.302558	7.2052	0.122219	0.786421
TMEM38B	-0.368047	-0.368479	4.36187	0.122227	0.786421
MTMR1	-0.315175	-0.315293	6.48652	0.122334	0.786687
NCAPG2	-0.354865	-0.355446	6.05322	0.122407	0.78673
S100A6	0.291277	0.291288	9.51313	0.122562	0.786889
SCAPER	-0.387431	-0.388011	4.16738	0.122605	0.786889
PSTK	0.719868	0.725527	2.41571	0.122629	0.786889
EEF2K	0.426517	0.427456	4.08109	0.122697	0.786906
SPAG7	0.337364	0.33761	5.26875	0.12302	0.788553
MIER1	-0.303911	-0.303939	7.64974	0.123232	0.788932
TAX1BP3	-0.406548	-0.407341	3.96068	0.123329	0.788932
BCORL1	-0.452143	-0.453128	3.63937	0.123344	0.788932
CLN8	0.33602	0.336268	5.31288	0.123388	0.788932
ZNF514	0.414058	0.414865	4.13963	0.123409	0.788932
IFI35	-0.367871	-0.368215	4.4628	0.123536	0.789035
CDKN2D	-0.480388	-0.481998	3.68217	0.123557	0.789035
PIGL	-0.496541	-0.497923	3.19531	0.123634	0.789104
TPRG1L	-0.32132	-0.321469	6.11652	0.123748	0.789414
SYNGAP1	-0.395606	-0.396124	4.00089	0.124046	0.790666
SNX8	-0.336441	-0.336649	5.6653	0.124128	0.790666
KRTAP2-3	-1.17345	-1.22417	2.4973	0.124183	0.790666
HS6ST3	-2.20181	-2.5831	0.348135	0.124209	0.790666
UCP2	-1.02768	-1.0494	1.12304	0.124674	0.793204
PRDM10	-0.421779	-0.422582	4.06471	0.125007	0.794898
RTN4RL2	0.351992	0.352208	4.79659	0.125214	0.795793
RRS1	0.396205	0.396795	4.622	0.125394	0.796516
ZC3H3	-0.367937	-0.368452	4.51386	0.125497	0.796746
MAP3K10	-0.351295	-0.351588	4.82178	0.125612	0.796819
MLLT3	-0.32667	-0.326844	5.47531	0.125766	0.796819
YIPF2	-0.317603	-0.317719	6.02991	0.125808	0.796819
DGCR6L	-0.404217	-0.40501	4.29003	0.125836	0.796819
CROCC	0.36698	0.367379	4.88092	0.126062	0.796819
LINC00205	0.602325	0.605822	2.9151	0.126081	0.796819
CYP4V2	0.69049	0.695096	2.34919	0.126118	0.796819
CYTOR	-0.331267	-0.331485	5.66992	0.126193	0.796819
LINS1	-0.542545	-0.544708	3.1318	0.126247	0.796819
FAXDC2	0.570657	0.572706	2.80419	0.126254	0.796819
TSEN2	0.513436	0.515218	3.30568	0.126309	0.796819
SIK1	0.529105	0.530653	2.65585	0.126348	0.796819
INCA1	0.78041	0.787675	1.98883	0.12652	0.796819
IFI27L1	-0.645324	-0.649528	3.07387	0.126556	0.796819
TBC1D4	-0.310251	-0.310378	6.59973	0.126713	0.796819
RENBP	-0.644099	-0.646644	2.13365	0.126718	0.796819
RNF219	-0.4704	-0.47198	3.51476	0.12674	0.796819
SHKBP1	-0.307447	-0.307536	6.69509	0.126767	0.796819
GPX4	-0.321693	-0.321826	6.38729	0.126816	0.796819
YIPF1	0.370467	0.370965	4.40523	0.126874	0.796819
B9D1	-0.519194	-0.520868	3.11574	0.126907	0.796819
TMEM170A	-0.366154	-0.366536	4.50303	0.127097	0.797592
SH3D21	0.547233	0.549683	3.10221	0.127202	0.797833
ENDOG	-0.719398	-0.728833	3.17863	0.127394	0.798614
WDR47	0.360329	0.360763	4.73159	0.127476	0.798714
HAUS1	-0.437303	-0.438383	4.05242	0.127687	0.799287
KRT80	0.540991	0.543225	3.14438	0.127727	0.799287
STEAP2	-0.442089	-0.442924	4.01053	0.127952	0.799287
PLK4	-0.642832	-0.649964	4.1191	0.127957	0.799287
CRELD1	-0.341568	-0.341839	4.82148	0.128023	0.799287
NCAM2	-0.453195	-0.454207	3.52213	0.128169	0.799287
CEP295	0.41592	0.416837	4.26335	0.128239	0.799287
AFF1	-0.306964	-0.307024	7.03845	0.12825	0.799287
RAB3D	0.564552	0.566231	3.07833	0.128263	0.799287
IRF3	0.323163	0.323335	5.68754	0.12835	0.799287
SGPP1	-0.325307	-0.32548	5.89083	0.128355	0.799287
DIS3L2	0.387332	0.388077	4.14965	0.12837	0.799287
CHST14	-0.328098	-0.328317	5.4544	0.128536	0.799688
CDC45	-0.877631	-0.894504	3.45117	0.128568	0.799688
PROSER2	1.02837	1.04415	0.682191	0.128637	0.799702
NKRF	0.400844	0.401411	4.1348	0.128754	0.800011
RC3H1	0.346134	0.346452	5.1632	0.128949	0.800807
TMEM234	0.716483	0.721102	2.31577	0.129205	0.801982
ASB7	0.381641	0.382215	4.12695	0.129319	0.802273
PLEKHH2	-0.419374	-0.419957	3.56988	0.129438	0.802558
STRADB	-0.336331	-0.336549	5.14515	0.129499	0.802558
SLC4A2	0.30316	0.303218	7.25613	0.129759	0.803747
SPIN3	0.585649	0.587581	2.6819	0.129825	0.803747
GOT1	0.313295	0.313411	6.06549	0.130035	0.804547
ERV3-1	0.831615	0.839542	1.62986	0.130089	0.804547
PRR16	0.352708	0.353258	5.13115	0.130255	0.804832
ZNF215	0.517649	0.519565	3.15937	0.13027	0.804832
AEN	-0.308551	-0.308642	6.37933	0.130747	0.806282
CRNKL1	0.343024	0.343362	5.13586	0.130793	0.806282
USP39	-0.32215	-0.322357	5.68752	0.130814	0.806282
ZNF268	0.467472	0.468712	3.75687	0.130844	0.806282
EMILIN2	-0.398517	-0.399187	3.91556	0.130889	0.806282
GABBR1	0.396443	0.397184	4.26846	0.130955	0.806282
REC8	-0.512107	-0.51327	3.21804	0.130976	0.806282
CIRBP	0.304658	0.304722	7.1394	0.131203	0.807262
CSPG4	-0.313084	-0.313258	6.79301	0.131479	0.808544
ARHGAP20	-0.748543	-0.755845	2.00401	0.131691	0.809435
SLC43A1	-0.46111	-0.462283	3.51945	0.131844	0.809958
PLEKHG3	0.662139	0.667421	2.51098	0.131987	0.810025
DMAP1	0.345771	0.346129	4.88708	0.132076	0.810025
NLE1	-0.386703	-0.387391	4.25807	0.132111	0.810025
APEX1	0.318182	0.318354	6.27676	0.132165	0.810025
TNIP2	-0.328392	-0.328567	5.68094	0.132194	0.810025
ZNF674-AS1	-0.772776	-0.777977	2.08209	0.132398	0.810861
TSR2	-0.361313	-0.361805	4.69494	0.132998	0.814122
NEMP1	-0.366842	-0.367517	4.94168	0.133081	0.81421
RFK	-0.324749	-0.32492	5.60041	0.133357	0.815143
PCDHGA11	0.481181	0.482578	3.64786	0.13337	0.815143
GMDS-DT	-0.805407	-0.814576	1.49146	0.133555	0.815858
HEMK1	0.363238	0.363763	4.42358	0.133707	0.816074
AAAS	0.340483	0.340828	5.12154	0.133799	0.816074
HSPB8	-0.294673	-0.29472	7.76955	0.133931	0.816074
PGAP2	-0.435118	-0.43616	3.59275	0.133996	0.816074
DPH5	-0.400254	-0.401021	3.97717	0.134097	0.816074
PPCDC	-0.788925	-0.796484	2.09466	0.134149	0.816074
CARF	0.56157	0.563526	2.86076	0.134303	0.816074
ARMH3	0.358946	0.359461	4.58437	0.13435	0.816074
FKBP15	0.318793	0.318978	5.70041	0.1344	0.816074
PLEKHG2	0.331454	0.331728	5.38925	0.134452	0.816074
MT-TP	-0.517327	-0.519214	2.90675	0.134489	0.816074
ZNF616	0.511038	0.513043	2.97599	0.134697	0.816074
APOL1	-0.31899	-0.319137	5.4644	0.134724	0.816074
FABP4	-1.80269	-1.98933	1.08223	0.134757	0.816074
S100A13	0.332348	0.332561	5.21561	0.134768	0.816074
ECT2	-0.316158	-0.316357	6.2636	0.134872	0.816074
PROCR	-0.329364	-0.329557	5.22672	0.134902	0.816074
CCDC137	0.350215	0.350697	4.88003	0.134903	0.816074
UBN1	-0.311464	-0.311579	6.19706	0.134953	0.816074
LZTS2	-0.303149	-0.30322	6.79283	0.134955	0.816074
SNX18	0.314977	0.315135	6.54578	0.135035	0.816113
RNF152	0.491894	0.493456	3.15188	0.135139	0.816113
JMJD6	-0.334872	-0.335172	5.21194	0.135216	0.816113
GSDMD	-0.332595	-0.332844	5.52413	0.135365	0.816113
ACTN1	0.287366	0.287378	9.80515	0.135387	0.816113
HMGN3-AS1	1.09162	1.12123	0.891878	0.135408	0.816113
METTL27	-0.9659	-0.985287	1.5676	0.135479	0.816113
NAA60	0.848977	0.858865	1.35726	0.135661	0.816113
RNASEH2A	-0.475062	-0.477425	4.80431	0.135681	0.816113
SH3KBP1	0.302452	0.302533	6.84956	0.135747	0.816113
NSUN5	-0.591229	-0.593603	2.4895	0.135788	0.816113
ZNF81	0.471495	0.472861	3.14301	0.135878	0.816113
VPS37D	-0.708524	-0.713094	2.06433	0.135942	0.816113
GRIA1	1.19702	1.23611	0.572765	0.135966	0.816113
CDK5	0.439396	0.440692	3.64127	0.136035	0.816113
SUSD5	-0.767064	-0.775638	2.47566	0.136053	0.816113
LIMS2	-0.316571	-0.316729	5.77621	0.136182	0.816476
ZDHHC1	-0.403044	-0.403775	3.52906	0.136301	0.816782
CCDC28A	-0.41235	-0.413165	3.59827	0.136427	0.816805
ALKBH5	-0.304343	-0.304428	6.58321	0.136466	0.816805
SERPINB2	0.297657	0.297702	7.54077	0.13651	0.816805
[truncated: 9,962 more rows]

## Sheet: ARID1A_KO_clone11_vs_WT_NonKRAS
Name	logFC	unshrunk.logFC	logCPM	PValue	FDR
SULF1	4.13601	4.13712	7.72561	4.90525e-50	5.86716e-46
ALDH1A1	4.2653	4.26708	7.74158	1.50117e-49	8.97778e-46
CEMIP	4.40482	4.40696	6.24107	3.94887e-42	1.57441e-38
MMP1	-2.04628	-2.04642	8.46911	4.42995e-38	1.32466e-34
PLAT	1.60097	1.60101	10.8651	7.66538e-38	1.83371e-34
IGFBP5	4.91826	4.92682	5.6778	1.84258e-36	3.67319e-33
SERPING1	2.71373	2.71497	7.02762	5.06517e-36	8.65493e-33
FN1	1.20717	1.20717	14.3481	7.90302e-35	1.1816e-31
COL8A1	1.38709	1.38711	10.599	4.97848e-34	6.6164e-31
LOX	1.81335	1.81353	8.2641	1.58459e-32	1.89533e-29
TAGLN	1.65892	1.6591	8.04125	5.27655e-31	5.73753e-28
CTGF	1.35589	1.35593	9.42133	2.85737e-30	2.84808e-27
NTN4	1.35185	1.35192	8.88802	3.56286e-30	3.27811e-27
ANKRD1	1.84957	1.84987	7.0317	1.09816e-29	9.38218e-27
NRCAM	2.9066	2.91011	6.49405	5.10644e-29	3.90434e-26
MFGE8	1.47181	1.47195	8.45951	5.22275e-29	3.90434e-26
TGFBI	1.03849	1.0385	11.9594	1.44371e-28	1.01578e-25
SYNPO2	2.1397	2.14064	7.08665	7.81251e-28	5.19142e-25
DCN	1.24654	1.24657	9.62022	1.03132e-27	6.49246e-25
GALNT5	1.40232	1.40244	8.08034	4.18146e-27	2.50073e-24
THBS1	1.11059	1.11061	10.4944	1.67389e-26	9.53398e-24
ADARB1	-4.16804	-4.18154	5.35646	1.90121e-26	1.03366e-23
IGF2	1.3086	1.30866	9.7418	4.67588e-26	2.43166e-23
IGFBP3	5.01178	5.0253	4.37204	8.66125e-26	4.31655e-23
ERRFI1	1.76834	1.76889	7.442	1.06698e-25	5.10488e-23
NRK	-7.7161	-7.87393	3.55319	1.76776e-25	8.13238e-23
MYO18B	6.35366	6.44216	4.02452	6.85074e-25	3.03488e-22
DSP	1.14166	1.14174	8.54386	9.91492e-24	4.23544e-21
BEX1	-2.68631	-2.68845	5.37674	3.7317e-23	1.53913e-20
COL1A1	1.11443	1.11444	11.115	4.17162e-23	1.66322e-20
COL1A2	1.04219	1.0422	11.0599	4.73283e-23	1.82611e-20
BMP6	2.84705	2.84981	4.91557	8.32282e-23	3.11091e-20
CXCL5	-2.40317	-2.40574	6.84158	1.31992e-22	4.7841e-20
POSTN	7.02701	7.23975	4.02941	8.51802e-22	2.99659e-19
CALD1	0.910343	0.910356	10.8206	1.09914e-21	3.75623e-19
MFAP5	2.13424	2.13544	5.08277	6.18556e-20	2.05515e-17
NAA16	0.883203	0.883228	10.28	1.3517e-19	4.35957e-17
SORT1	1.8892	1.89001	6.00886	1.38503e-19	4.35957e-17
PPP1R14A	3.74075	3.75195	4.56257	1.84166e-19	5.64824e-17
NUPR1	4.1974	4.22826	5.22431	9.84479e-19	2.94384e-16
DMD	1.63452	1.63547	6.10385	1.25362e-18	3.65721e-16
GALNT15	2.52611	2.53106	6.16472	1.64483e-18	4.68424e-16
RPS6KA2	1.2441	1.24436	7.61905	1.76982e-18	4.92299e-16
GFPT2	-2.87528	-2.88156	4.41195	3.0226e-18	8.12761e-16
SERPINB2	1.23045	1.23076	7.54077	3.05779e-18	8.12761e-16
CORIN	3.19133	3.19736	3.72279	3.27486e-18	8.51536e-16
GREM1	0.798964	0.798972	10.9925	3.42149e-18	8.70733e-16
C1S	4.2026	4.22542	4.37261	1.12781e-17	2.81036e-15
PALLD	0.842357	0.842391	9.33656	1.39076e-17	3.39489e-15
STC2	0.812531	0.812548	10.2267	1.46784e-17	3.51137e-15
APCDD1L	-5.015	-5.05504	3.08986	2.39304e-17	5.61238e-15
IFI6	1.63841	1.64	7.34375	4.17179e-17	9.59592e-15
LMCD1	1.16162	1.16187	6.84062	4.73474e-17	1.06853e-14
VSIR	2.17189	2.17541	5.52237	6.86253e-17	1.52005e-14
MN1	1.83413	1.8353	4.99354	8.0089e-17	1.74172e-14
FAM198B	3.47271	3.49088	4.09654	9.89515e-17	2.1135e-14
IGFBP6	1.3226	1.323	6.82248	1.28037e-16	2.68675e-14
LRP1	0.777242	0.777256	10.6898	2.37332e-16	4.89437e-14
CREB5	5.00814	5.09501	4.21709	4.55921e-16	9.24283e-14
NPTX1	0.820569	0.820592	9.28176	4.73576e-16	9.44073e-14
MAGEA3	-6.57052	-6.8	2.89051	5.10589e-16	1.00117e-13
CRISPLD2	1.07763	1.07786	7.59745	6.95578e-16	1.3419e-13
IGFBP7	0.817084	0.817113	9.33291	1.11271e-15	2.11256e-13
PSG4	0.919155	0.919219	8.24382	1.15403e-15	2.15677e-13
COL5A1	0.915243	0.915287	8.83574	1.38452e-15	2.54773e-13
SEMA5A	0.960405	0.960471	7.95446	2.2349e-15	4.05025e-13
ALS2CL	3.22067	3.23312	3.73008	3.1405e-15	5.6065e-13
SH2B3	-0.864259	-0.864338	8.53491	5.39397e-15	9.48784e-13
IL11	-2.00894	-2.0124	5.32342	6.56711e-15	1.13839e-12
MICAL2	0.871895	0.871962	8.21844	8.45081e-15	1.444e-12
CD4	1.72828	1.72969	5.38693	8.69929e-15	1.46552e-12
FAM133A	-4.10703	-4.13633	3.37258	1.32931e-14	2.20832e-12
C1orf198	1.27984	1.28039	6.1361	1.4802e-14	2.42529e-12
PSG5	0.903621	0.903699	7.93259	2.23341e-14	3.60998e-12
CDC20	-1.17632	-1.17674	6.33864	3.04841e-14	4.80345e-12
EPAS1	1.2658	1.26644	6.74907	3.05211e-14	4.80345e-12
ZNF185	-4.31942	-4.3664	3.23669	4.16535e-14	6.39154e-12
SSH1	0.809776	0.809839	8.19988	4.16804e-14	6.39154e-12
GABBR2	1.47452	1.47544	5.45871	5.59507e-14	8.47122e-12
HHIP	1.0187	1.01888	7.03408	8.09905e-14	1.21091e-11
TPM1	0.768434	0.76847	9.39044	9.4988e-14	1.40266e-11
CORO2B	-1.51264	-1.51387	5.30173	1.16697e-13	1.70221e-11
COL3A1	0.743451	0.743471	9.77991	1.65001e-13	2.37781e-11
H2AFZ	-0.885742	-0.885872	7.52754	1.7998e-13	2.56278e-11
RSPO4	1.37194	1.37275	6.20337	2.90076e-13	4.08187e-11
KCNK6	1.37505	1.37586	5.55504	4.68904e-13	6.52159e-11
RGS4	-1.52211	-1.52306	4.9886	5.33242e-13	7.33115e-11
RRM2	-1.01815	-1.01834	6.81485	5.76026e-13	7.82937e-11
ANTXR1	0.901578	0.901761	7.42936	5.85542e-13	7.86929e-11
COL16A1	1.90072	1.90263	4.66469	9.00893e-13	1.19729e-10
DEPTOR	4.78685	4.87326	2.99995	9.38169e-13	1.23313e-10
MYL9	0.844045	0.844153	7.81855	1.02703e-12	1.33526e-10
CERCAM	0.836942	0.837044	8.1175	1.32055e-12	1.6984e-10
LMO4	-1.13114	-1.1317	6.36061	1.52914e-12	1.94575e-10
KCNK2	1.12773	1.12825	6.34879	1.61553e-12	2.03404e-10
KLHL24	2.33888	2.34561	4.41816	1.96518e-12	2.4485e-10
STC1	-0.774288	-0.774363	8.42394	2.56578e-12	3.16385e-10
ITGA3	-0.744094	-0.744137	9.23464	2.67911e-12	3.26988e-10
PLEKHA7	1.14093	1.14133	6.00473	2.81716e-12	3.40364e-10
CFH	0.850274	0.850454	7.54058	3.76317e-12	4.50113e-10
SEMA6D	1.08382	1.08417	6.2246	3.89886e-12	4.61726e-10
FAM171A1	1.57764	1.57898	5.18295	4.19086e-12	4.9144e-10
AK4	1.18576	1.18619	6.14205	4.25934e-12	4.94621e-10
THSD4	1.24764	1.24839	5.81317	4.50799e-12	5.18462e-10
GRIA3	2.73179	2.75469	6.50168	5.14919e-12	5.86566e-10
SMC4	-0.806183	-0.806279	7.61529	5.79163e-12	6.53525e-10
TNC	-2.90938	-2.94019	6.1021	6.40699e-12	7.16206e-10
MAGEC2	-1.58283	-1.58456	4.71827	6.62254e-12	7.33043e-10
NQO1	-0.79165	-0.791734	7.5218	6.68019e-12	7.33043e-10
OLAH	1.29206	1.2931	5.74493	7.17974e-12	7.80699e-10
SERPINA9	3.51967	3.53585	2.64923	8.53922e-12	9.20159e-10
FGF2	0.905301	0.905464	7.13131	9.48365e-12	1.0128e-09
SMTN	-0.811264	-0.811372	7.73454	9.90067e-12	1.04798e-09
COL4A2	0.667743	0.667759	9.97697	1.08901e-11	1.1426e-09
FAP	1.05529	1.05557	6.53606	1.10457e-11	1.14885e-09
ANLN	-0.755564	-0.755623	7.93565	1.1486e-11	1.18434e-09
2020-09-11	0.685817	0.685838	9.27437	1.37281e-11	1.40344e-09
ADAM10	0.72512	0.725174	8.29455	1.46687e-11	1.48407e-09
FST	-2.69043	-2.69858	3.10702	1.4765e-11	1.48407e-09
C1R	1.67005	1.67219	4.45998	1.68674e-11	1.68126e-09
KCNJ6	2.07168	2.0756	3.9635	1.71996e-11	1.70021e-09
FBXO32	2.80443	2.81407	3.41085	1.73984e-11	1.70576e-09
IL7R	-2.09032	-2.09317	3.74752	2.09291e-11	2.03523e-09
CAMK2N1	1.04793	1.04825	6.07013	2.16089e-11	2.08439e-09
TFRC	-0.793164	-0.793263	7.51539	2.24427e-11	2.1475e-09
DHRS3	4.93833	5.08012	2.89519	2.40098e-11	2.27921e-09
CNN1	2.95594	2.97261	3.3809	2.50164e-11	2.35607e-09
SDC3	1.91554	1.91907	4.5118	2.77149e-11	2.58982e-09
ZNF469	2.24749	2.25203	3.57831	2.79502e-11	2.59157e-09
PDIA4	-0.725916	-0.725979	7.94047	2.92701e-11	2.69308e-09
CTHRC1	0.827262	0.827361	7.32798	3.28042e-11	2.9952e-09
MEG3	0.647896	0.647913	10.3477	3.82215e-11	3.46339e-09
C1orf115	2.33214	2.33722	3.89595	4.27068e-11	3.84073e-09
PAGE1	-7.55557	-1.44269e+08	4.27912	4.34666e-11	3.87988e-09
CDKN1A	0.627463	0.627491	10.0674	5.99049e-11	5.30757e-09
UBE2S	-0.872838	-0.873009	7.01948	6.46806e-11	5.68856e-09
ADAMTSL1	-0.929836	-0.930049	6.49246	6.90015e-11	6.02428e-09
CTSF	1.9707	1.97528	4.10589	7.44184e-11	6.45014e-09
MX1	1.83677	1.8425	5.79581	9.71518e-11	8.35995e-09
FER1L4	1.8482	1.8515	4.06787	1.05008e-10	8.97143e-09
RTN1	-3.83275	-3.90864	3.66318	1.09763e-10	9.31118e-09
H2AFX	-0.969426	-0.969708	6.30221	1.21016e-10	1.01935e-08
RPS6KA3	-1.00053	-1.001	6.31163	1.45317e-10	1.21548e-08
PRSS12	0.869871	0.870036	6.58019	1.57893e-10	1.3115e-08
BST1	2.35447	2.3622	3.33883	1.73805e-10	1.43371e-08
SLC5A12	7.87092	1.44269e+08	2.17272	1.94995e-10	1.59749e-08
LMNB2	-0.721645	-0.721717	7.92759	2.03623e-10	1.65682e-08
CALCOCO1	0.867191	0.867465	7.11572	2.3485e-10	1.898e-08
SHROOM3	4.15141	4.19431	1.95771	2.37197e-10	1.9041e-08
APLP1	1.32566	1.3267	5.35774	2.40901e-10	1.92094e-08
C1RL	1.35612	1.3576	5.3231	2.86248e-10	2.26743e-08
C5AR1	1.52378	1.52567	4.65652	2.90932e-10	2.28937e-08
TERT	0.636532	0.63655	10.1059	3.06565e-10	2.39661e-08
FBLN5	1.2194	1.22037	5.41914	3.36754e-10	2.61553e-08
CDH13	-1.44544	-1.4475	5.05021	3.92366e-10	3.0278e-08
COL11A1	2.03369	2.03873	4.862	4.16216e-10	3.19125e-08
NREP	1.04471	1.04506	5.61606	4.39543e-10	3.34865e-08
ECHDC2	3.64954	3.69603	2.5175	4.795e-10	3.62994e-08
ASAP3	3.35594	3.39335	3.03304	4.86835e-10	3.64125e-08
LMOD1	3.19592	3.21996	2.75311	4.87083e-10	3.64125e-08
TOP2A	-0.735146	-0.735204	7.83784	4.92857e-10	3.65398e-08
ZWINT	-1.30884	-1.30973	4.92339	4.94895e-10	3.65398e-08
IGF1R	0.803822	0.803994	6.89574	5.04711e-10	3.70359e-08
PPP1R3C	1.34813	1.34956	5.25659	5.31553e-10	3.86546e-08
ATP9A	1.09013	1.09063	5.75875	5.33234e-10	3.86546e-08
NSD2	-0.729463	-0.729539	7.75459	6.0649e-10	4.37001e-08
KITLG	-1.233	-1.23412	5.39361	7.52999e-10	5.39319e-08
ITGA11	0.642742	0.642775	8.70673	7.69472e-10	5.47837e-08
HLA-B	1.00862	1.00943	8.09753	8.23278e-10	5.82676e-08
RAI14	0.653396	0.653441	8.57891	8.50304e-10	5.98264e-08
NES	1.15529	1.15613	5.50056	9.47942e-10	6.6306e-08
CENPF	-0.728379	-0.728468	7.27254	1.08337e-09	7.5338e-08
ITGA6	-0.676496	-0.676556	7.74206	1.10245e-09	7.62222e-08
MT-RNR1	0.782366	0.782436	9.15823	1.16505e-09	8.00872e-08
GRIK2	1.54819	1.55062	4.82612	1.20589e-09	8.24209e-08
RNF150	1.22684	1.22765	5.14295	1.21391e-09	8.24975e-08
LTBP1	0.604816	0.604842	9.16792	1.32394e-09	8.94671e-08
NALCN	2.63813	2.64632	2.88167	1.41338e-09	9.49746e-08
VCAN	0.742401	0.742462	7.6335	1.64278e-09	1.09773e-07
LDHA	0.580798	0.580807	10.3255	1.86583e-09	1.23984e-07
GPAT3	-2.26358	-2.27491	3.78931	2.02838e-09	1.34041e-07
GGT5	1.41516	1.41621	4.62426	2.15778e-09	1.41809e-07
SPARC	0.568622	0.568634	10.3993	2.2562e-09	1.47467e-07
HMGA1	-0.596113	-0.59613	9.97046	2.35723e-09	1.5312e-07
PHLDA2	-0.951366	-0.951782	5.98214	2.3683e-09	1.5312e-07
SERPINE2	1.38757	1.38917	4.96161	2.43476e-09	1.56571e-07
HMGB2	-0.923924	-0.92424	6.02261	2.56809e-09	1.63465e-07
LIF	0.944096	0.944387	5.99545	2.5693e-09	1.63465e-07
BNIP3L	0.711845	0.711941	7.54684	2.7548e-09	1.7434e-07
KIF2C	-1.13147	-1.13205	5.25729	3.14025e-09	1.97687e-07
EDIL3	0.842586	0.842751	6.80723	3.22145e-09	2.01737e-07
MXI1	1.63505	1.63743	4.43929	3.28311e-09	2.04527e-07
DOCK4	-1.37474	-1.37774	5.79541	3.47656e-09	2.15457e-07
RECK	0.981844	0.982292	5.76176	3.50384e-09	2.16028e-07
KIAA0355	0.971309	0.97178	5.90211	4.13729e-09	2.52659e-07
GPR155	1.53217	1.53455	4.51393	4.15267e-09	2.52659e-07
COL4A1	0.614703	0.614732	8.94142	4.16134e-09	2.52659e-07
AHNAK2	-1.94841	-1.95441	4.38982	4.44209e-09	2.67914e-07
MT-RNR2	0.620418	0.620424	12.1043	4.4574e-09	2.67914e-07
FAM129A	-1.01552	-1.01632	6.94969	4.99646e-09	2.97968e-07
NCAPG	-0.978004	-0.978354	5.75278	5.00724e-09	2.97968e-07
CPM	1.20278	1.20367	5.41912	5.22774e-09	3.09549e-07
ZMAT3	0.667822	0.667915	8.39678	7.06442e-09	4.16244e-07
SH3PXD2A	0.682471	0.682549	7.92356	7.22819e-09	4.23806e-07
RORA	2.19905	2.20762	3.371	7.55058e-09	4.40548e-07
ITM2C	0.691021	0.691125	7.72248	8.45021e-09	4.90646e-07
MAST3	1.32666	1.32873	5.16093	8.53418e-09	4.93127e-07
CACNA1C	1.24409	1.24554	5.31449	9.18118e-09	5.27962e-07
LIMCH1	0.725616	0.725712	7.12961	9.88468e-09	5.65697e-07
CYP1B1	1.80867	1.81091	3.78738	1.03577e-08	5.89946e-07
SLC6A15	-3.40527	-3.455	2.81446	1.07257e-08	6.08012e-07
STAT1	0.634716	0.634778	8.40287	1.25065e-08	7.05615e-07
IFITM3	0.661415	0.661506	9.01423	1.27332e-08	7.15033e-07
SERTAD4	-4.90312	-5.05662	0.85976	1.30549e-08	7.29674e-07
WNT5A	0.54652	0.546526	10.7484	1.51028e-08	8.40209e-07
C16orf74	-2.5639	-2.5812	3.15707	1.57024e-08	8.69522e-07
PTTG1	-0.976803	-0.977267	5.58859	1.83847e-08	1.01336e-06
PRRX2	1.92745	1.93231	3.36908	2.04881e-08	1.12412e-06
HSPA2	1.29214	1.29341	4.67584	2.07109e-08	1.13115e-06
TNFRSF11B	3.07031	3.08955	1.97874	2.1643e-08	1.17669e-06
MAPRE3	1.99034	1.99817	4.21839	2.17874e-08	1.17918e-06
ATP8A1	-2.99929	-3.03548	3.01039	2.19954e-08	1.18508e-06
CYP26B1	5.84422	6.2389	0.87695	2.41427e-08	1.29494e-06
TP53INP1	1.20461	1.20601	5.30492	2.45456e-08	1.31067e-06
EREG	-0.794557	-0.794889	8.22109	2.48077e-08	1.31878e-06
PLXNB1	2.2035	2.21324	3.91658	2.92133e-08	1.54611e-06
PDGFRA	0.72853	0.728652	6.7418	2.94673e-08	1.55268e-06
FGD4	0.774284	0.77447	6.46644	3.1027e-08	1.62769e-06
SNX18	0.813361	0.813544	6.54578	3.18414e-08	1.66312e-06
HSPB7	3.27262	3.3	1.96656	3.27222e-08	1.7017e-06
SOX9	-4.40497	-4.49776	1.49916	3.94744e-08	2.04396e-06
PCDHB7	3.1537	3.18489	2.32544	4.10886e-08	2.11837e-06
MKI67	-0.717201	-0.717267	7.81407	4.24961e-08	2.18153e-06
PKD2	0.66908	0.669177	7.4123	4.40201e-08	2.2501e-06
MCM2	-0.98602	-0.986517	5.49604	4.73826e-08	2.41167e-06
KIF22	-1.26825	-1.26917	4.95968	5.00709e-08	2.5377e-06
EPB41L1	1.15157	1.15275	5.13963	5.37457e-08	2.71246e-06
DOCK6	1.03044	1.0315	5.89315	5.94816e-08	2.98932e-06
BUB1	-0.975662	-0.976081	5.46	6.02557e-08	3.01556e-06
LTBP3	0.78377	0.783974	7.40896	6.09974e-08	3.03996e-06
TNFRSF21	0.935735	0.936354	6.19434	6.31207e-08	3.13272e-06
ENC1	-1.1109	-1.112	5.25657	6.53552e-08	3.23022e-06
DEPP1	1.66276	1.66647	3.67208	6.70184e-08	3.29879e-06
PMEPA1	1.19348	1.19456	5.02309	6.80426e-08	3.33548e-06
TCF7L1	3.60221	3.65422	2.31736	7.07621e-08	3.45463e-06
IFI27	4.28665	4.49069	4.51919	7.20217e-08	3.50131e-06
ROBO4	-1.13189	-1.13293	4.85441	7.23037e-08	3.50131e-06
PIK3IP1	1.55868	1.56098	3.7344	7.5253e-08	3.62944e-06
ETV4	-1.11624	-1.11757	5.36167	9.62905e-08	4.62542e-06
CD40	2.88079	2.90553	2.79962	9.71076e-08	4.64602e-06
PLK1	-0.888384	-0.888709	5.78607	9.85e-08	4.69386e-06
CDK1	-1.01786	-1.01836	5.35551	9.89527e-08	4.69672e-06
CYBRD1	0.620593	0.620664	7.75745	1.15643e-07	5.46721e-06
FUCA1	1.21299	1.21549	6.90625	1.16191e-07	5.47148e-06
PCNA	-0.758841	-0.759085	6.45265	1.18534e-07	5.55996e-06
PTPRS	1.22182	1.22371	5.17383	1.21158e-07	5.66084e-06
ASPM	-0.738515	-0.738625	6.87293	1.23044e-07	5.72656e-06
DIAPH3	-0.8293	-0.829529	6.11236	1.29739e-07	6.01474e-06
SLC22A17	3.79305	3.87634	2.1405	1.43703e-07	6.63639e-06
PLA2R1	1.8953	1.90191	3.39555	1.46673e-07	6.74754e-06
CBS	2.29673	2.3182	5.1485	1.49375e-07	6.84549e-06
HSPA8	-0.513514	-0.513524	10.2984	1.52282e-07	6.93992e-06
MCM4	-0.768718	-0.768895	6.50157	1.52596e-07	6.93992e-06
SMAD9	1.35275	1.35434	4.77941	1.74314e-07	7.89762e-06
TGFB2	0.988204	0.989349	6.73771	1.7511e-07	7.90373e-06
MCM7	-0.756039	-0.756222	6.46193	1.86651e-07	8.393e-06
EGR1	0.798163	0.798585	7.39968	1.88817e-07	8.45857e-06
SPAG5	-0.974759	-0.975265	5.22506	2.15929e-07	9.63703e-06
FOSL1	-0.616703	-0.616776	7.85579	2.28479e-07	1.01592e-05
FILIP1L	1.85804	1.86545	3.35865	2.53595e-07	1.12343e-05
STMN1	-0.617002	-0.617064	7.7533	2.63438e-07	1.16272e-05
FAXDC2	2.37552	2.3893	2.80419	2.6872e-07	1.1799e-05
FKBP4	-0.768104	-0.768391	6.48635	2.69303e-07	1.1799e-05
CENPE	-0.815495	-0.815753	5.93524	2.73497e-07	1.1939e-05
LY6E	0.708807	0.709044	7.31514	2.75539e-07	1.19844e-05
PLAUR	-0.740456	-0.740677	6.94565	2.78437e-07	1.20666e-05
THBS2	0.843329	0.8437	5.90344	2.83239e-07	1.22304e-05
ZER1	0.836252	0.836687	6.15006	3.03273e-07	1.30441e-05
YOD1	3.66248	3.74519	2.36354	3.04265e-07	1.30441e-05
SLC39A8	-1.31623	-1.31864	4.5704	3.0596e-07	1.307e-05
SHCBP1	-0.865638	-0.865961	5.60691	3.18078e-07	1.35392e-05
ACTA2	1.18231	1.18397	5.09347	3.33839e-07	1.41598e-05
TRIM28	-0.6036	-0.60366	8.2956	3.40157e-07	1.43767e-05
SLC43A3	-1.06106	-1.06211	5.08753	3.53561e-07	1.48906e-05
GAS1	1.69504	1.69808	3.19813	3.59207e-07	1.50754e-05
GDF6	1.70265	1.70619	3.37927	3.67905e-07	1.53752e-05
CHPF	0.626909	0.627021	7.97485	3.68922e-07	1.53752e-05
SLC7A11	-0.653475	-0.653607	7.17721	3.88488e-07	1.61344e-05
HSPD1	-0.574198	-0.574252	8.27087	4.00713e-07	1.65845e-05
SVEP1	1.23407	1.23547	4.53795	4.70224e-07	1.93943e-05
PTK7	0.727015	0.727274	6.55045	4.73596e-07	1.94663e-05
ZNF486	2.8919	2.92235	1.97734	5.21661e-07	2.13685e-05
RAB6B	2.42829	2.44698	2.99366	5.2637e-07	2.14878e-05
MT-ND1	0.807875	0.807897	10.2761	5.36871e-07	2.18419e-05
NPAS1	1.73469	1.742	4.10665	5.83469e-07	2.36572e-05
KIF11	-0.908392	-0.908717	5.70301	5.95519e-07	2.40642e-05
SVIL	1.44466	1.44767	3.79831	6.03711e-07	2.43131e-05
NEDD9	0.862887	0.863257	5.58006	6.0649e-07	2.4343e-05
ZBTB16	1.99497	2.00201	2.99578	6.54568e-07	2.61849e-05
ICAM5	1.20088	1.20267	5.27285	6.73989e-07	2.6872e-05
GTSE1	-0.924212	-0.924687	5.17134	6.77439e-07	2.69198e-05
TSPAN9	0.962151	0.963012	5.69517	6.82251e-07	2.70212e-05
KNTC1	-0.896211	-0.896602	5.44009	6.99232e-07	2.76024e-05
MT-ND6	0.719397	0.719443	8.75639	7.01759e-07	2.7611e-05
FOXE1	1.34763	1.35033	4.2279	7.1401e-07	2.79688e-05
CD33	1.08777	1.08909	5.11586	7.15529e-07	2.79688e-05
CCNB1	-0.721421	-0.721625	6.17311	7.33445e-07	2.85757e-05
DTYMK	-0.905634	-0.9061	5.4691	7.41329e-07	2.87891e-05
KPNA2	-0.608053	-0.608132	7.46184	7.53791e-07	2.91783e-05
JMY	1.15263	1.15452	5.02789	7.84247e-07	3.02593e-05
RMDN2	1.62575	1.62955	3.4248	8.11622e-07	3.12148e-05
MMP16	-1.33005	-1.33264	4.61962	8.34427e-07	3.19891e-05
FCGRT	1.60068	1.60602	4.02574	8.62961e-07	3.2967e-05
FANCA	-1.20879	-1.21026	4.09688	8.65449e-07	3.2967e-05
ITGAV	0.539571	0.539608	8.5837	8.74801e-07	3.32175e-05
POLA1	-1.1062	-1.10781	5.02305	8.80218e-07	3.33174e-05
LTBP2	0.777096	0.777333	6.1713	8.90271e-07	3.35916e-05
NEAT1	0.550232	0.550294	8.67141	9.29708e-07	3.49693e-05
STAT2	0.635968	0.636121	7.46577	1.00655e-06	3.77409e-05
MAGEA1	-6.6738	-1.44269e+08	1.4152	1.03519e-06	3.86934e-05
EFEMP2	0.621354	0.621438	7.68683	1.06607e-06	3.97235e-05
ARHGEF34P	4.53474	4.74039	1.28134	1.10638e-06	4.10975e-05
FAM83D	-1.02767	-1.02841	4.6778	1.13404e-06	4.19946e-05
TNS1	3.77993	3.88324	1.38858	1.1569e-06	4.27088e-05
TMPO	-0.7197	-0.719853	6.7163	1.17261e-06	4.31558e-05
CITED2	0.580736	0.580809	8.05208	1.30607e-06	4.77416e-05
TK1	-0.718635	-0.718821	6.20691	1.311e-06	4.77416e-05
PDE1C	1.1233	1.12431	4.45392	1.31519e-06	4.77416e-05
MT-ND5	0.661068	0.66108	10.6356	1.31619e-06	4.77416e-05
TIMP1	0.590381	0.59045	8.50244	1.31718e-06	4.77416e-05
MGMT	-6.46842	-1.44269e+08	2.11092	1.33043e-06	4.80764e-05
CNTN1	-4.27149	-4.42225	1.29217	1.33731e-06	4.81796e-05
UBE2C	-1.01819	-1.01894	4.65722	1.42885e-06	5.13226e-05
WWC1	-3.09614	-3.15818	2.12499	1.52534e-06	5.45435e-05
DLGAP5	-0.864556	-0.864944	5.42031	1.52764e-06	5.45435e-05
BCL7A	1.01734	1.01837	5.06916	1.55518e-06	5.53618e-05
NETO2	-0.92183	-0.922497	5.34249	1.57376e-06	5.58568e-05
PDE3A	1.59889	1.60286	3.28944	1.66142e-06	5.86717e-05
AXL	-0.506901	-0.506916	9.7631	1.66288e-06	5.86717e-05
CCDC80	0.506951	0.506962	10.0871	1.67326e-06	5.88643e-05
ABCA2	0.662385	0.662577	6.98606	1.7596e-06	6.17202e-05
FEN1	-0.870289	-0.870749	5.33206	1.78171e-06	6.2313e-05
CLSPN	-1.03696	-1.03767	4.82855	1.83148e-06	6.38668e-05
FKBP10	0.522197	0.522225	9.45225	1.84775e-06	6.4247e-05
AURKB	-1.30938	-1.31094	4.22981	1.98786e-06	6.89181e-05
TBX2	-0.719682	-0.719844	6.79552	2.15174e-06	7.43843e-05
PTCSC3	-3.92724	-4.04012	1.06294	2.1598e-06	7.44477e-05
TGFBR2	0.535781	0.535813	8.81266	2.18605e-06	7.51362e-05
APCDD1L-DT	-3.58772	-3.64422	1.22199	2.19478e-06	7.52201e-05
GHR	3.53009	3.61212	1.39593	2.2325e-06	7.62942e-05
E2F7	-0.71417	-0.714383	6.22852	2.24925e-06	7.66474e-05
GAA	1.0005	1.0019	5.83178	2.36055e-06	8.02118e-05
SLC39A10	0.716757	0.71695	6.29174	2.42256e-06	8.20857e-05
IFITM1	1.58046	1.58793	5.28119	2.43522e-06	8.22816e-05
MCM5	-0.862089	-0.86246	5.5916	2.45934e-06	8.28626e-05
SLC6A8	1.36186	1.36477	4.26	2.4698e-06	8.29811e-05
KNL1	-0.808626	-0.808946	5.57059	2.56075e-06	8.5796e-05
NIN	-0.638678	-0.63879	7.32024	2.61039e-06	8.72146e-05
FHL1	-1.48312	-1.48726	3.83277	2.66089e-06	8.86543e-05
SSTR1	1.00032	1.0025	7.09033	2.69158e-06	8.94277e-05
MCM3	-0.778429	-0.778724	5.83117	2.73114e-06	9.04909e-05
ARID5B	0.722201	0.722453	6.1252	2.78825e-06	9.21279e-05
PAGE3	-3.21867	-3.25561	1.73218	2.87131e-06	9.46108e-05
IL32	1.7305	1.74054	3.84503	2.90732e-06	9.55342e-05
HIF1A	0.516184	0.516211	8.97445	2.94371e-06	9.64651e-05
MRVI1	2.89608	2.92657	1.63307	3.0512e-06	9.97142e-05
PRC1	-0.642466	-0.642595	6.60332	3.13671e-06	0.000102227
TACC3	-0.861372	-0.861691	5.80785	3.14519e-06	0.000102227
ESM1	-1.08134	-1.08336	5.4016	3.16279e-06	0.00010236
BRCA2	-1.11554	-1.11678	4.19531	3.16639e-06	0.00010236
DKK2	3.36459	3.41579	1.19485	3.38788e-06	0.000109225
GDPD5	2.49428	2.5194	2.5027	3.49295e-06	0.000112091
GATA6	3.21197	3.26258	1.54817	3.49552e-06	0.000112091
CCND2	2.44984	2.49117	5.46554	3.56031e-06	0.000113863
ALDH5A1	1.37025	1.37473	4.68606	3.69073e-06	0.000117719
FANCD2	-1.10503	-1.1064	4.12377	3.80922e-06	0.000121176
LRP8	-1.00991	-1.01088	4.76683	3.84532e-06	0.000122
NDC1	-0.817939	-0.818367	5.54777	3.87678e-06	0.000122672
USP1	-0.793017	-0.793346	5.83687	3.95434e-06	0.000124796
BRCA1	-1.04743	-1.0484	4.34816	4.01664e-06	0.000126429
ITPR1	0.977657	0.97942	6.92823	4.03467e-06	0.000126663
TEX2	0.875792	0.876414	5.44407	4.05567e-06	0.000126989
ALDH1L2	0.580374	0.580483	8.14581	4.08335e-06	0.000127522
PCLAF	-1.16788	-1.16921	4.11265	4.09702e-06	0.000127616
MT1E	-0.59377	-0.593869	7.12736	4.13204e-06	0.00012819
PROS1	-0.954325	-0.95556	5.47549	4.13687e-06	0.00012819
LAMB2	0.5158	0.515818	9.80146	4.16867e-06	0.000128841
PCSK7	0.699193	0.69938	6.58199	4.18727e-06	0.000128859
CHRM2	2.72019	2.74183	1.51282	4.19079e-06	0.000128859
FAM111B	-1.20741	-1.2091	3.86541	4.20523e-06	0.000128971
NTM	1.16894	1.17114	4.51634	4.26492e-06	0.000130467
HEXB	-0.58926	-0.589358	7.72343	4.27944e-06	0.000130577
LINC00665	4.36676	4.57138	0.895837	4.41367e-06	0.000134331
ST3GAL5	-1.6902	-1.70069	3.73134	4.44998e-06	0.000134756
MEIS1	0.760088	0.760418	5.83102	4.45017e-06	0.000134756
ARL6IP1	-0.646625	-0.646789	6.46798	4.57137e-06	0.000138076
SLC25A23	2.2653	2.2793	3.21217	4.95172e-06	0.000149188
CSPG4	-0.620839	-0.620939	6.79301	5.02171e-06	0.000150916
MYLK	-0.874806	-0.875329	5.15557	5.03467e-06	0.000150927
ARNTL2	-0.883884	-0.884524	5.29489	5.12422e-06	0.000153227
KCNT2	2.2105	2.23445	3.47575	5.15474e-06	0.000153412
SERTAD4-AS1	-6.77157	-1.44269e+08	0.0152621	5.15606e-06	0.000153412
PFAS	-0.848714	-0.849304	5.23455	5.41044e-06	0.000160581
CKAP2L	-0.863391	-0.863821	5.25727	5.66557e-06	0.000167737
WSB1	0.567926	0.568031	7.9458	5.79613e-06	0.000171179
A4GALT	1.10743	1.10912	4.80823	5.90542e-06	0.000173576
MGAM	2.07121	2.08644	2.68693	5.90631e-06	0.000173576
NYNRIN	0.920435	0.921214	4.99639	5.9945e-06	0.000175335
MINDY2	0.664477	0.664659	6.75772	5.99549e-06	0.000175335
WDR62	-1.21622	-1.2178	3.98951	6.01247e-06	0.000175403
MTCO3P12	0.958909	0.959554	5.26067	6.0618e-06	0.000176412
PRKAR2B	-3.78798	-3.90017	0.997128	6.09259e-06	0.000176841
LIMA1	0.540835	0.540899	8.10659	6.10611e-06	0.000176841
CHD6	0.678843	0.679062	6.63299	6.23969e-06	0.000180199
CDCA2	-1.02869	-1.0295	4.57938	6.26311e-06	0.000180199
KIF26B	2.24356	2.25753	2.06884	6.26725e-06	0.000180199
CDC6	-0.978193	-0.978888	4.70339	6.73304e-06	0.000193127
PAICS	-0.57751	-0.577605	7.35844	6.89669e-06	0.000197348
RPS6KA6	-2.14466	-2.16076	2.25227	7.25057e-06	0.000206933
LBH	2.14268	2.15959	2.85923	7.26626e-06	0.000206933
HAS2	0.691519	0.691714	6.14946	7.30967e-06	0.000207675
PLAU	-0.897734	-0.898383	4.96135	7.32955e-06	0.000207746
NPR3	1.13793	1.13965	4.07784	7.3999e-06	0.000209244
DNAJA1	-0.578748	-0.578851	7.41238	7.8579e-06	0.000221671
SRSF3	-0.552067	-0.552128	7.75981	7.96191e-06	0.000224076
EPHB4	1.08438	1.08569	4.7048	8.0247e-06	0.000225313
STEAP2	-1.63198	-1.63806	4.01053	8.13091e-06	0.000227239
IFITM2	0.606906	0.607044	8.24118	8.13127e-06	0.000227239
MXD4	0.614856	0.615007	7.09695	8.46212e-06	0.000235933
CHTF18	-1.19455	-1.19625	4.02689	8.57654e-06	0.000238568
AURKA	-0.885338	-0.885787	5.28407	8.66702e-06	0.000240387
IDI1	-0.679135	-0.679321	6.27801	8.68214e-06	0.000240387
GAS2L3	-0.915564	-0.916147	5.07138	8.91921e-06	0.000246253
HMBS	-1.02792	-1.02927	4.63532	8.93519e-06	0.000246253
MYOCD	1.87279	1.87802	2.67008	9.09833e-06	0.000250173
HSD17B2	-3.3041	-3.37755	1.14407	9.14962e-06	0.000251006
YPEL3	0.915427	0.916151	5.17341	9.39153e-06	0.000257021
MYOF	0.482549	0.482565	9.77664	9.41697e-06	0.000257021
CIP2A	-0.951793	-0.95243	4.87605	9.43333e-06	0.000257021
PIK3R1	0.783694	0.784092	5.68692	9.48539e-06	0.000257852
CENPI	-1.19555	-1.19688	4.10601	9.51251e-06	0.000258003
PTMA	-0.567614	-0.567651	8.56047	9.59919e-06	0.000259764
MYADM	0.561856	0.561923	7.5918	9.62269e-06	0.000259813
KIF20B	-0.802144	-0.802512	5.39772	1.02085e-05	0.00027501
MT-CO3	0.682798	0.682806	11.1611	1.02328e-05	0.000275045
NFKBIZ	0.863866	0.86464	5.51645	1.04299e-05	0.000279713
SKA3	-1.16831	-1.16973	4.19554	1.05473e-05	0.000282229
CIT	-0.773381	-0.773718	5.5394	1.11898e-05	0.000298751
H2AFV	-0.649178	-0.649339	6.49505	1.14513e-05	0.000305054
SIDT2	0.672186	0.672431	6.48295	1.18453e-05	0.000314848
SERAC1	1.14216	1.1438	4.76172	1.20237e-05	0.000318881
NCOA3	0.688891	0.689115	6.62304	1.2392e-05	0.000327455
CDH24	-1.13673	-1.13889	4.32163	1.2403e-05	0.000327455
LOXL4	0.845988	0.847466	9.14856	1.24291e-05	0.000327455
EZH2	-1.2309	-1.23322	3.83383	1.2466e-05	0.000327706
NUSAP1	-0.860297	-0.860772	5.2195	1.2524e-05	0.000328508
ALDH3A2	-0.973281	-0.975337	5.99201	1.32834e-05	0.000347666
TMTC1	0.689975	0.690158	6.92275	1.353e-05	0.000353109
TMEM200A	-0.772239	-0.77259	5.77033	1.35505e-05	0.000353109
KIT	2.80587	2.83845	1.22103	1.36405e-05	0.000353498
MAPK10	-2.20626	-2.22259	2.74916	1.36411e-05	0.000353498
PAK4	-0.807354	-0.807892	5.52395	1.36986e-05	0.000353498
ARHGEF5	2.34451	2.36751	2.3147	1.3711e-05	0.000353498
RACGAP1	-0.701948	-0.702175	5.94004	1.37132e-05	0.000353498
HIST1H2BK	1.3013	1.30491	4.3436	1.42263e-05	0.000365937
GEMIN5	-0.896456	-0.897266	5.11059	1.42957e-05	0.000366934
C3orf18	1.31185	1.31579	4.22632	1.4482e-05	0.000370342
TPX2	-0.618045	-0.61814	6.958	1.44904e-05	0.000370342
TPD52L1	2.1282	2.14683	2.56765	1.54117e-05	0.000392714
CD83	1.66605	1.67623	3.57696	1.54314e-05	0.000392714
NOTCH1	-0.675867	-0.676133	6.3092	1.55974e-05	0.000396094
INCENP	-0.781747	-0.782145	5.64177	1.61084e-05	0.000408204
PPIF	-0.578419	-0.578592	7.82031	1.64079e-05	0.000414916
ARMC9	0.834608	0.835275	5.13858	1.67296e-05	0.000422159
MRC2	0.512164	0.51221	8.97091	1.68955e-05	0.000425447
PGD	-0.605925	-0.606061	6.81805	1.69905e-05	0.00042694
PNRC1	0.733533	0.733963	6.03079	1.73642e-05	0.000435415
CEP55	-0.771911	-0.772236	5.51465	1.74078e-05	0.000435596
RAB3D	2.28305	2.30449	3.07833	1.78494e-05	0.000445713
PHF19	-0.807361	-0.807862	5.2719	1.93e-05	0.000480932
FBXL13	-2.96164	-3.02291	1.50785	1.97321e-05	0.000490677
MT-CO1	0.559895	0.559898	12.5173	1.99094e-05	0.000494059
EXOSC9	-0.902911	-0.903711	4.88683	2.00554e-05	0.000496651
GMNN	-1.02288	-1.02399	4.1992	2.01159e-05	0.00049712
LCE2A	-0.735465	-0.735735	6.04119	2.02589e-05	0.000499623
PAMR1	0.557286	0.557389	7.36654	2.04146e-05	0.000502427
BBC3	1.41089	1.41642	3.67637	2.11303e-05	0.000518973
PRR11	-0.703117	-0.703354	5.87133	2.11983e-05	0.000519577
SPAG4	1.5717	1.57794	3.12023	2.14039e-05	0.000523542
TRAM1	0.520287	0.520333	8.25923	2.1761e-05	0.00053119
FAM43A	1.77895	1.78376	2.87707	2.20377e-05	0.000535904
LMNB1	-0.820432	-0.820855	5.2305	2.20437e-05	0.000535904
CDC25B	-0.703327	-0.703634	5.94947	2.22288e-05	0.000539307
POLA2	-1.02582	-1.02694	4.43316	2.27437e-05	0.000550684
HIP1	0.576818	0.576906	7.31459	2.32969e-05	0.000562937
SLC22A18	1.09291	1.09525	4.61807	2.34123e-05	0.000564587
CKS1B	-0.955	-0.955943	4.60195	2.36454e-05	0.00056906
PTX3	-0.583664	-0.583738	7.04301	2.39879e-05	0.000576143
PLXNB3	1.34085	1.3443	3.4429	2.4603e-05	0.000589035
SEMA3A	-1.90105	-1.9193	4.91277	2.46231e-05	0.000589035
NUF2	-0.921804	-0.922456	4.60958	2.53322e-05	0.000604543
AFAP1	0.515175	0.515226	7.93296	2.53725e-05	0.000604543
NUP205	-0.619088	-0.619275	6.57495	2.54297e-05	0.000604701
MEF2C	-1.14749	-1.15055	4.32014	2.59254e-05	0.000615266
GEM	-0.860307	-0.861534	5.87983	2.62683e-05	0.000622169
MT-CYB	0.789413	0.789426	10.7466	2.65152e-05	0.000626776
SGIP1	0.821762	0.822417	5.56165	2.7765e-05	0.000655025
HSPE1	-1.12496	-1.12689	4.11708	2.79619e-05	0.000657416
SYNE2	-0.85722	-0.857753	4.97123	2.79763e-05	0.000657416
MAP3K7CL	1.12705	1.12863	3.71757	2.82192e-05	0.000661824
TM4SF1	-0.511034	-0.51109	8.19874	2.90327e-05	0.000679571
ALDH1A3	4.1069	4.30956	0.672483	2.91876e-05	0.000681861
SLC19A1	-1.03781	-1.03946	4.20406	2.95764e-05	0.000689596
CHAC2	-1.89762	-1.90983	2.48137	3.02281e-05	0.000703421
LITAF	1.21411	1.21696	4.33537	3.05492e-05	0.000709513
NCAPG2	-0.683863	-0.684074	6.05322	3.06309e-05	0.000710032
SLC25A5	-0.556564	-0.556662	7.32558	3.08207e-05	0.000712488
TOMM40	-0.693645	-0.693975	5.95652	3.0856e-05	0.000712488
CKAP2	-0.613676	-0.613825	6.32333	3.17855e-05	0.000732537
GABARAPL1	0.682305	0.682601	6.26652	3.26925e-05	0.00075199
NFIL3	0.62146	0.621652	6.58768	3.27768e-05	0.000752482
LPXN	1.61402	1.62124	2.84579	3.30148e-05	0.000756495
SLC4A11	2.77905	2.87453	4.072	3.35059e-05	0.000766279
RSF1	0.609992	0.610169	6.8585	3.39522e-05	0.000775004
GCNT1	0.720929	0.721246	5.79595	3.60413e-05	0.000821125
EPS8L2	0.859768	0.860582	5.11995	3.62852e-05	0.000825109
CDC42EP5	1.32522	1.32956	4.33533	3.71015e-05	0.00084207
MOXD1	-0.920706	-0.9218	4.95441	3.74898e-05	0.000849272
RPL39L	-4.5195	-4.93446	0.731266	3.79887e-05	0.000858948
HJURP	-0.841852	-0.842345	4.99572	3.83476e-05	0.000865426
UBXN2B	1.47029	1.47684	3.77524	3.86731e-05	0.000871127
BRWD1	0.647198	0.647453	6.4547	3.91996e-05	0.000881328
POLQ	-1.02621	-1.02738	4.128	3.9542e-05	0.000887357
NID1	-0.55433	-0.554437	7.11153	3.99229e-05	0.000894229
LRRC8C	-0.689044	-0.689284	5.85239	4.0143e-05	0.000897478
ENPEP	-0.838643	-0.839637	5.14519	4.05517e-05	0.000904923
IQGAP3	-0.658082	-0.658272	5.94345	4.11483e-05	0.000916527
STIL	-1.03964	-1.04089	4.07719	4.20028e-05	0.000933822
PAPPA	0.482392	0.482415	8.72249	4.24493e-05	0.000941997
ANGPTL2	6.40354	1.44269e+08	0.598456	4.44777e-05	0.000985182
ESPL1	-1.06285	-1.06436	4.03523	4.58867e-05	0.00101451
HS3ST3A1	-0.8804	-0.881333	4.72999	4.68462e-05	0.00103283
CDCA5	-0.987089	-0.987812	4.69835	4.69324e-05	0.00103283
MFAP4	2.39513	2.42875	2.38688	4.69744e-05	0.00103283
RRM1	-0.576883	-0.577001	6.81794	4.91968e-05	0.00107971
MGAT5B	-3.06931	-3.14127	1.00668	4.97188e-05	0.00108917
HSPA4L	-1.40445	-1.4106	4.4179	4.987e-05	0.00109049
CSE1L	-0.567613	-0.567708	7.21941	5.01038e-05	0.0010936
GLRX5	-0.769342	-0.769946	5.26625	5.08744e-05	0.00110839
CAD	-0.587916	-0.588065	6.80238	5.1294e-05	0.00111422
OAS3	-1.56797	-1.57943	4.22482	5.13282e-05	0.00111422
LGR4	-0.841865	-0.842521	4.87896	5.1862e-05	0.00112377
APP	0.452805	0.452823	9.97723	5.27404e-05	0.00113896
GLS	0.51137	0.511423	7.86602	5.27533e-05	0.00113896
SPC24	-1.04993	-1.05137	3.88556	5.35679e-05	0.00115446
RNASEH2A	-0.890119	-0.890788	4.80431	5.4551e-05	0.00117353
MMP19	0.7118	0.712173	5.8548	5.54944e-05	0.00119168
PLOD1	0.464403	0.464431	9.32537	5.69012e-05	0.00121971
RIN1	-0.710582	-0.711023	5.76508	5.82689e-05	0.00124436
C8orf34	2.97578	3.04146	1.20045	5.82976e-05	0.00124436
MYO18A	1.28422	1.28746	3.78866	5.83633e-05	0.00124436
CD9	2.81346	2.85686	1.4935	5.95278e-05	0.00126693
SYNGR1	1.33291	1.33706	3.69315	5.97064e-05	0.00126847
SSRP1	-0.544586	-0.544683	7.30834	6.01942e-05	0.00127656
GMNC	2.13586	2.158	2.4586	6.04164e-05	0.00127901
ATP8B2	0.617371	0.617573	6.57405	6.06665e-05	0.00128204
PTGS1	0.535706	0.535773	7.21749	6.36561e-05	0.00134
EHD3	0.740326	0.740882	5.56667	6.37105e-05	0.00134
MT-ND3	0.584744	0.584795	8.74932	6.37456e-05	0.00134
APOL6	0.846197	0.847196	5.58792	6.40029e-05	0.00134242
ELL2	0.524884	0.524958	7.74928	6.40849e-05	0.00134242
CCNG2	0.860893	0.861627	4.96535	6.507e-05	0.00136067
HSPH1	-0.558961	-0.559084	6.96973	6.57579e-05	0.00137246
IKZF2	1.37997	1.38533	3.53993	6.58634e-05	0.00137246
ARHGAP11A	-0.657498	-0.657713	5.8641	6.72021e-05	0.00139792
C5AR2	1.4336	1.43879	3.4415	6.82507e-05	0.00141727
EBI3	3.43493	3.6307	4.97563	6.83912e-05	0.00141772
CCT2	-0.529758	-0.52984	7.49792	6.9818e-05	0.0014448
FOXL2	2.97364	3.05209	1.56952	7.06764e-05	0.00146004
CCT6A	-0.490493	-0.490551	7.92455	7.13564e-05	0.00147154
SLC17A5	0.572977	0.573173	7.36998	7.35061e-05	0.00151326
FOXL2NB	3.51789	3.65199	1.63805	7.48974e-05	0.00153926
PTPRE	2.55152	2.61402	3.02478	7.60619e-05	0.00156051
CUX1	0.595451	0.595619	7.02756	7.63946e-05	0.00156465
CPEB2	0.546525	0.546612	7.4682	7.69189e-05	0.0015727
SH2D5	-1.30393	-1.3073	3.47596	7.72223e-05	0.0015762
DDX39A	-0.703989	-0.70433	5.49592	7.81722e-05	0.00159051
CENPW	-1.10026	-1.10204	3.74854	7.81893e-05	0.00159051
TKT	-0.472803	-0.472836	8.36838	7.9177e-05	0.00160787
TGM2	0.440272	0.440288	9.41707	7.945e-05	0.00161068
APBB1	0.700577	0.700976	5.79907	7.98807e-05	0.00161667
MYEF2	-2.1738	-2.19975	2.60384	8.14096e-05	0.00164316
SHISA3	-6.20539	-1.44269e+08	0.411188	8.1464e-05	0.00164316
LPIN1	-0.523203	-0.523291	7.30555	8.21065e-05	0.00165333
SLC16A4	0.597636	0.597865	6.53611	8.23649e-05	0.00165574
DNMT1	-0.532504	-0.532593	7.09722	8.26978e-05	0.00165965
CFLAR	0.565188	0.565319	6.99669	8.37218e-05	0.00167738
DEK	-0.505152	-0.505203	7.78431	8.438e-05	0.00168774
PBK	-0.856277	-0.856784	5.02709	8.60154e-05	0.00171758
PCNT	-0.652098	-0.652337	6.04481	8.81071e-05	0.00175641
KHDRBS3	-0.98616	-0.987694	4.58526	8.82812e-05	0.00175696
HSPG2	0.451573	0.451584	11.3877	8.98467e-05	0.00178514
ZFP36L2	0.659271	0.659475	6.061	9.33112e-05	0.0018509
BRSK1	1.24493	1.25087	4.33791	9.45631e-05	0.00187263
MYRF	-1.90818	-1.92231	2.84609	9.69787e-05	0.00191729
HDAC5	0.787264	0.787888	5.44514	9.98298e-05	0.0019704
NYAP1	2.83615	2.90091	1.64548	0.000100032	0.00197114
GPX3	-1.04971	-1.05223	4.16496	0.000100947	0.0019859
RBMX	-0.531385	-0.531476	7.30266	0.000101274	0.00198866
RCAN1	0.53245	0.532542	7.16489	0.00010142	0.00198866
CARMIL1	0.795658	0.79617	5.08681	0.000103364	0.00202346
CLU	-1.60269	-1.61559	5.87024	0.000103555	0.00202389
CDC45	-1.28105	-1.28343	3.45117	0.000105157	0.00205185
ZEB1	0.639328	0.63958	6.23213	0.00010563	0.00205655
CSTA	3.75034	4.12491	3.8037	0.000105742	0.00205655
LRRC2	2.8639	2.91975	1.13188	0.00010611	0.00206035
KIF20A	-0.76275	-0.763146	5.14139	0.0001067	0.00206846
STEAP3	-0.533308	-0.533413	7.16589	0.000107022	0.00207134
ARNT2	2.17022	2.18809	1.51893	0.000108851	0.00210131
SLC4A3	1.90018	1.91364	2.09228	0.000108922	0.00210131
MRAS	0.750606	0.751235	5.60549	0.000110311	0.00212468
RUSC2	0.569214	0.569343	6.96163	0.00011072	0.00212913
HELLS	-0.912944	-0.913751	4.40891	0.000112502	0.00215992
TSPYL2	0.765244	0.76598	5.67781	0.000113333	0.0021724
MCM6	-0.687453	-0.687848	5.47198	0.000113949	0.00217658
CTSA	0.555588	0.555735	7.0856	0.000113952	0.00217658
ATP2B4	0.463116	0.463146	8.41859	0.000114225	0.00217658
PPDPF	0.538951	0.53907	7.24816	0.000114455	0.00217658
ZNF419	1.64505	1.65427	2.90125	0.000114461	0.00217658
YPEL2	1.52852	1.53468	3.29327	0.000116152	0.00220524
LY6K	-1.53473	-1.54202	3.03924	0.000117687	0.00223082
ADGRA3	-0.77883	-0.779454	5.26114	0.00011817	0.00223644
ODC1	-0.604313	-0.604544	6.72626	0.000119317	0.00225459
FHOD1	-0.68639	-0.686695	5.65983	0.000120402	0.0022715
CAMK4	-0.955604	-0.956782	4.40707	0.000122141	0.00230067
HSPA5	-0.434356	-0.434364	10.3289	0.000125684	0.00236369
BRI3BP	-0.877279	-0.878311	4.62116	0.000126514	0.00237225
RARG	0.699314	0.699845	5.80152	0.000126794	0.00237225
STEAP1	-1.11678	-1.1192	3.63079	0.000126881	0.00237225
ARMH4	2.32645	2.35259	1.86802	0.000126933	0.00237225
SKA1	-0.993442	-0.994639	4.07441	0.000129078	0.00240859
RAB29	1.04633	1.04927	4.35552	0.00012965	0.00241549
ABLIM3	-0.508076	-0.508163	7.6521	0.00013006	0.00241936
SNN	2.27008	2.29602	1.8639	0.000130952	0.00243217
TXNRD1	-0.467287	-0.467321	8.38542	0.000131725	0.00244273
TTI2	-1.44158	-1.44805	3.31113	0.000139231	0.00257793
THOP1	-0.679264	-0.679625	5.86145	0.000139853	0.00258545
STOM	0.605894	0.606118	6.36984	0.000143997	0.00265794
RNF182	-0.995263	-0.996665	4.19439	0.000147322	0.00271295
IRAK1	-0.495193	-0.495276	7.64378	0.000147431	0.00271295
KIF15	-1.05664	-1.05814	3.69205	0.000148152	0.00272203
KIF4A	-0.832319	-0.832843	4.94742	0.000150323	0.00275601
ZFP90	0.884236	0.88546	4.61279	0.000150462	0.00275601
BDKRB2	5.93926	1.44269e+08	0.36486	0.000150789	0.00275777
FAM214A	0.910353	0.91164	4.54062	0.000152964	0.00279329
AKR1C1	-3.28633	-3.39486	1.00477	0.000153413	0.00279722
MEIS3	0.609837	0.610106	6.40976	0.000156303	0.00284557
PLCB4	-0.828492	-0.829273	4.65188	0.000156721	0.00284885
PLD3	0.512825	0.512913	8.02365	0.000156965	0.00284896
DHCR24	-0.475773	-0.475816	7.77566	0.000157992	0.00286324
H3F3B	-0.465954	-0.465998	8.36187	0.000159495	0.00288612
MBD5	0.926387	0.927884	4.46043	0.000162512	0.00293627
PTCHD4	1.36636	1.37261	3.78319	0.000164848	0.00297111
CDK2	-0.6561	-0.656364	5.82924	0.000164937	0.00297111
CENPO	-0.994115	-0.995445	4.16765	0.000167005	0.00300383
ECT2	-0.587692	-0.587863	6.2636	0.000167337	0.00300528
PCDHGA4	1.45799	1.46497	3.20614	0.000167658	0.00300654
CTNNAL1	-0.569393	-0.569558	6.49283	0.000168582	0.00301859
CHAF1B	-0.99153	-0.993081	3.81376	0.000168897	0.0030197
NOG	0.916532	0.917796	4.77909	0.000170451	0.00304292
FJX1	-0.553607	-0.553722	6.7344	0.000177008	0.00315318
PIGZ	1.91814	1.93423	2.29391	0.000177154	0.00315318
TUBA1B	-0.487237	-0.487272	8.26693	0.000178372	0.00317015
RBM43	1.23987	1.24372	3.35273	0.000181083	0.00321348
FZD7	0.672111	0.672525	5.54724	0.000181348	0.00321348
ANKRD18B	-1.29722	-1.30316	3.95638	0.000182268	0.00322502
RAD54L	-1.3594	-1.36301	3.00332	0.000182632	0.00322668
NCAPD3	-0.669462	-0.66977	5.666	0.000184676	0.00325797
TAF1A	-1.50389	-1.51126	2.88835	0.000185437	0.00326658
HCG11	2.37515	2.41196	1.74108	0.00018993	0.00334081
DCAF6	0.588325	0.588516	6.32982	0.000192763	0.00338567
MTCO1P12	0.539451	0.53949	8.50334	0.000197091	0.00345661
CENPU	-0.997013	-0.998517	3.77987	0.000197997	0.00346741
PKMYT1	-0.999615	-1.001	3.83945	0.00020096	0.00351416
HNRNPA2B1	-0.435704	-0.43572	9.52509	0.000204706	0.00357444
SMC2	-0.605593	-0.605797	5.9482	0.000207563	0.00361905
XAF1	0.882383	0.883959	5.32593	0.000215364	0.00374321
SIRPA	0.95686	0.958803	4.41435	0.000215381	0.00374321
B3GALT2	3.20894	3.40151	4.11104	0.000215624	0.00374321
NISCH	0.547682	0.547852	7.01078	0.000221245	0.00383523
ACE	3.30615	3.43825	1.51262	0.00022188	0.00384068
AIG1	-0.607283	-0.607568	6.08641	0.000223849	0.00386807
ID3	0.594782	0.594978	6.50117	0.00022411	0.00386807
PTPRN2	-3.91534	-4.13274	0.49487	0.000224766	0.00387381
RFC4	-0.992599	-0.994175	3.9551	0.000227496	0.00391523
ADGRA2	0.924351	0.925911	4.14712	0.000233667	0.00401565
NEIL3	-1.35997	-1.36353	2.96977	0.000234884	0.00403078
MOV10	-0.638896	-0.639264	5.93747	0.000235481	0.00403179
NCAPH	-0.809063	-0.809778	4.54547	0.000235618	0.00403179
CACYBP	-0.594134	-0.594333	6.22339	0.000236231	0.00403652
ABCA1	0.698249	0.69862	5.34479	0.000237252	0.00404817
CCNA2	-0.617554	-0.61778	5.67617	0.000240639	0.00410011
AGPAT5	-0.734689	-0.735364	5.34307	0.000241004	0.00410049
HMGCS1	-0.584552	-0.584712	6.05594	0.000243935	0.00414447
FDXR	0.932572	0.934754	5.09682	0.000247224	0.00418882
HMGB1	-0.496222	-0.496296	7.33139	0.000247246	0.00418882
KREMEN1	1.32007	1.32511	3.66431	0.000249884	0.00422752
ID2	1.24152	1.24544	3.2647	0.000252368	0.00426352
HPRT1	-0.682788	-0.683196	5.57234	0.000253879	0.004283
REEP4	-0.76507	-0.7657	4.88743	0.000254955	0.00429509
MT-TN	1.20176	1.20524	3.34682	0.000255382	0.00429623
ASF1B	-1.01571	-1.01722	3.77829	0.000265287	0.0044566
ZNF621	0.830436	0.831499	4.70216	0.000266517	0.00447097
BARD1	-1.03842	-1.04011	3.78215	0.00027425	0.00459426
ANP32E	-0.56752	-0.567674	6.37449	0.000276225	0.00462088
TELO2	-0.710218	-0.710675	5.3001	0.000277924	0.00464281
PLA2G4A	-1.26708	-1.27233	3.45306	0.00027993	0.0046698
NCEH1	-0.519148	-0.519256	6.85597	0.0002861	0.00476608
MCM8	-0.767972	-0.76858	4.90696	0.000286555	0.00476701
OSBPL6	-1.11734	-1.12121	3.88948	0.00028789	0.00477665
PHACTR2	0.650004	0.650282	6.23877	0.000287933	0.00477665
POLD2	-0.612879	-0.613139	6.01842	0.000288583	0.0047808
SUV39H1	-1.42694	-1.43144	2.81745	0.000289784	0.00479394
CCNF	-0.888158	-0.88902	4.40994	0.000290177	0.00479394
RANGAP1	-0.49797	-0.498034	7.52303	0.000295093	0.00486842
RIBC2	-5.7547	-1.44269e+08	0.507876	0.000295638	0.00486901
NEK7	0.477258	0.477308	7.71981	0.000295943	0.00486901
CRYZ	-0.614588	-0.614861	5.89211	0.000301997	0.0049618
CCDC86	-0.788102	-0.788936	4.77051	0.000302584	0.00496463
PPFIA4	2.33898	2.36516	1.29124	0.000304817	0.0049944
BAIAP2-DT	1.03393	1.0364	3.83295	0.000308041	0.00504033
SNRNP40	-0.779607	-0.780362	5.02604	0.000309857	0.00506311
PPP1R3G	-1.82488	-1.84476	2.85843	0.000310646	0.00506693
AFDN	-0.530394	-0.530539	6.70909	0.000310938	0.00506693
SKA2	-0.652868	-0.653167	5.86754	0.000314102	0.00511154
PPP1R14B	-0.534435	-0.534543	7.12295	0.000315952	0.0051277
FN3K	1.77005	1.78914	3.05991	0.000315953	0.0051277
PMAIP1	-0.65629	-0.656831	5.97402	0.00031734	0.00514323
ISL1	-2.28072	-2.31364	1.37476	0.000319123	0.00516513
NCAPH2	-0.76778	-0.768416	4.8834	0.000324382	0.00523847
HLA-C	0.896199	0.898604	5.48744	0.00032453	0.00523847
DDX11	-0.880936	-0.881954	4.56133	0.000325518	0.00524733
TCF19	-1.36457	-1.36937	2.67332	0.000326325	0.00525326
TIPARP	0.506179	0.506249	7.6618	0.000335124	0.00538766
PCDHB14	1.78101	1.7946	2.15009	0.000335615	0.00538831
CENPM	-1.49745	-1.50303	2.56838	0.000338561	0.00542833
CMTM4	0.615629	0.615923	6.30845	0.000341301	0.00546011
GPD2	-0.550998	-0.551137	6.42848	0.000341647	0.00546011
TACC2	-0.908827	-0.910401	4.33272	0.000341913	0.00546011
FOXM1	-0.680092	-0.680384	5.52678	0.000344245	0.00549003
SLC1A3	-2.49173	-2.53696	1.71324	0.000351209	0.00559362
FASN	-0.431149	-0.431164	9.59001	0.000359346	0.00571561
NPC1	-0.559013	-0.559226	7.07366	0.000376356	0.00597821
EPHA5	0.609206	0.609513	6.63489	0.000377183	0.0059834
FRMPD4	0.710119	0.710536	5.29052	0.000381686	0.00604682
CYB561A3	0.642937	0.643232	5.68914	0.000386965	0.00612234
ABTB2	1.91808	1.94217	2.59884	0.000388107	0.00612773
POMGNT2	1.05164	1.05438	3.88203	0.00038833	0.00612773
ABCA8	0.700564	0.70113	5.49286	0.000392859	0.00619103
HASPIN	-1.52002	-1.52713	2.5347	0.000404471	0.00636562
BTG2	1.44562	1.45684	4.23344	0.000406111	0.00638304
KDM6B	0.724429	0.725283	5.44384	0.000408473	0.00640252
CACFD1	1.98235	2.00517	2.23374	0.000408886	0.00640252
DGKI	0.959382	0.960971	3.93613	0.000408956	0.00640252
TIMELESS	-0.691583	-0.691967	5.45135	0.000411724	0.00643743
KIF23	-0.603021	-0.603192	6.01946	0.00041471	0.00647565
PGK1	0.435507	0.435532	8.68179	0.000418946	0.00653326
VBP1	-0.628309	-0.628625	5.81852	0.000422533	0.00658062
ADAMTSL4	1.14182	1.1473	4.2957	0.000423799	0.00659176
DDAH1	0.447248	0.447279	8.34478	0.000424919	0.0066006
QTRT2	-0.832388	-0.833413	4.78096	0.000425892	0.00660713
HLA-E	0.541717	0.541934	7.18425	0.000433096	0.00671018
ORC1	-1.35293	-1.35742	2.75049	0.000441107	0.00682546
REEP2	1.66207	1.67519	3.6428	0.000447653	0.00691666
GLIPR2	1.80545	1.82184	2.4521	0.000448158	0.00691666
TCEA3	1.39108	1.39618	2.6575	0.000449814	0.00693328
TICRR	-1.02526	-1.027	3.73929	0.000455568	0.00701293
HMMR	-0.737004	-0.737459	4.89718	0.000459135	0.00705876
CCT5	-0.459883	-0.459937	7.85341	0.000463923	0.00712321
LPIN3	0.817692	0.818911	4.48346	0.00046887	0.00718707
KIAA1755	2.82998	2.90727	0.561043	0.000469284	0.00718707
HAND2-AS1	0.588944	0.589154	6.34123	0.000470184	0.00719164
ANXA1	0.416801	0.416813	9.83147	0.00047514	0.00725818
ABCE1	-0.496297	-0.496409	7.11637	0.000481923	0.00735239
RELT	-1.50548	-1.51626	3.08861	0.000485912	0.00740381
MRPL15	-0.675158	-0.675611	5.3415	0.000494584	0.00752149
PDLIM7	0.504322	0.504416	7.23507	0.000494893	0.00752149
MSH2	-0.673313	-0.673725	5.2446	0.000495718	0.00752447
OAS2	2.93732	3.12537	3.66697	0.00050272	0.00762108
TMEM173	0.707728	0.708293	4.9922	0.000512486	0.00775414
PIK3R4	-0.689103	-0.689655	5.23784	0.000512794	0.00775414
LBR	-0.564659	-0.564859	6.07496	0.000520648	0.00786297
TTLL12	-0.71642	-0.717189	5.40213	0.000525383	0.00792448
HAUS3	-0.925574	-0.927013	4.12388	0.000529188	0.00797182
PTGS2	0.999557	1.0025	4.85221	0.000531147	0.00799126
CDT1	-0.894547	-0.895615	4.16645	0.000533525	0.00801696
TMEM129	0.670353	0.670928	5.65099	0.000540129	0.008106
VRK1	-0.908785	-0.910083	3.97807	0.000548315	0.00821854
C4orf46	-0.954542	-0.955988	3.90375	0.000554564	0.0083018
DACH2	0.956168	0.957641	3.74494	0.000556078	0.00831405
CDCA8	-0.715567	-0.716073	4.72977	0.000557489	0.00832475
CEP126	1.10663	1.10968	3.35414	0.000562197	0.00838459
ZNF471	3.04929	3.14747	0.964774	0.000563555	0.00839438
ABAT	1.39601	1.40658	3.41392	0.0005727	0.00851998
PGRMC2	0.534517	0.53464	6.66917	0.000573807	0.00852585
AR	-0.822202	-0.823277	4.4039	0.000579612	0.00860141
PLSCR4	0.933866	0.935394	3.97807	0.000605801	0.00897892
MELK	-0.695384	-0.695794	5.09475	0.000610465	0.00903685
C3	5.4533	1.44269e+08	1.12028	0.000617509	0.00912982
CASP2	-0.684087	-0.684637	5.10426	0.000635776	0.00938829
MT-ND2	0.692229	0.692253	10.0826	0.000640049	0.00943973
LINC01583	-1.91604	-1.93352	1.84006	0.000640854	0.00943997
SLC27A1	0.697798	0.698438	5.09162	0.000643883	0.00947291
CENPH	-1.05642	-1.05839	3.6698	0.000656423	0.00964555
ECM2	2.01962	2.04428	1.83753	0.000657668	0.00965199
FLVCR1	-0.907047	-0.908553	3.95243	0.000664019	0.00973325
EXOSC8	-0.841985	-0.842999	4.5592	0.000670629	0.00981576
PKIA	-0.801724	-0.802544	4.72473	0.000671289	0.00981576
TYSND1	-1.05309	-1.05652	3.75136	0.000675479	0.00986496
LYAR	-0.76227	-0.763125	4.98827	0.000678856	0.0099022
COL13A1	-0.744307	-0.744971	4.85562	0.000680818	0.00991112
VAT1	0.460212	0.460263	7.98371	0.000681927	0.00991112
UTP20	-0.605604	-0.605862	6.01936	0.000682315	0.00991112
PTGFRN	0.472797	0.472868	7.48939	0.000682782	0.00991112
DTL	-0.797854	-0.798457	4.63846	0.000687079	0.0099614
DYSF	1.17507	1.18042	3.9366	0.000690309	0.0099961
POLE	-0.743677	-0.744196	5.06289	0.000699295	0.010114
ALPK2	0.531645	0.531768	6.86276	0.000707419	0.0102191
ORC6	-0.847006	-0.848175	3.90462	0.000710107	0.0102456
CAMK1G	-1.31154	-1.31851	3.57895	0.000711197	0.0102489
HPCAL1	-0.696587	-0.697264	5.31926	0.000713128	0.0102644
DUSP1	0.453909	0.453965	7.74615	0.000715295	0.0102832
CD109	0.507954	0.508042	7.14709	0.000721074	0.0103539
MT-ATP6	0.623555	0.623564	11.3584	0.000732761	0.0105091
CTSB	0.394682	0.39469	10.6204	0.000752837	0.0107836
DDX31	-0.918582	-0.920458	4.20132	0.000753705	0.0107836
SPC25	-1.1735	-1.17627	3.1189	0.000767445	0.0109492
DDB2	0.673445	0.673994	5.33909	0.000768135	0.0109492
CENPA	-1.07245	-1.07465	3.28103	0.000768751	0.0109492
LINC00654	1.30439	1.3092	2.79725	0.000768945	0.0109492
KIF13A	0.531531	0.531675	6.53257	0.000772966	0.0109934
GPR173	1.05773	1.06105	3.69749	0.000773927	0.010994
TNFAIP3	0.755536	0.756257	4.86255	0.00077502	0.0109965
SNRPD1	-0.642842	-0.643255	5.52073	0.000778118	0.0110273
RGMB	-0.446076	-0.446121	7.77127	0.000789127	0.0111701
GRK6	-0.701898	-0.702461	5.55762	0.00079407	0.0112195
CDH10	-1.91558	-1.93719	2.08309	0.000794492	0.0112195
E2F1	-0.829181	-0.830151	4.1011	0.000796535	0.0112351
DDIAS	-1.26079	-1.26369	3.07703	0.00080171	0.0112948
WDR34	-0.731994	-0.732631	4.80259	0.000804189	0.0113164
SELPLG	1.12053	1.12299	3.17831	0.00080601	0.0113275
TTC39C	1.0337	1.03722	4.58301	0.000806876	0.0113275
GMFG	0.871213	0.872915	4.12989	0.000809146	0.0113461
CREBRF	0.790896	0.791928	4.60392	0.000833496	0.0116738
POLRMT	-0.591315	-0.591648	6.01284	0.000838572	0.0117305
TRIM22	0.540508	0.540758	6.62917	0.000839507	0.0117305
MSRB3	0.494151	0.494246	7.19083	0.000840524	0.011731
CMC2	-0.815144	-0.816246	4.401	0.000847474	0.0118143
CCDC134	-2.10366	-2.13301	1.58047	0.000853908	0.0118901
ZNF506	1.45022	1.45963	2.47157	0.000857418	0.0119251
FLAD1	-0.813147	-0.814457	4.42176	0.000865833	0.0120281
PTPRM	0.494725	0.494855	6.9454	0.000867029	0.0120308
LGMN	0.527643	0.52778	6.38659	0.000873129	0.0121014
ALPL	2.14884	2.17616	1.25005	0.000878031	0.0121552
DUS3L	-0.864057	-0.865726	4.13885	0.000884344	0.0122285
TTTY14	-2.2439	-2.27949	1.62319	0.000891347	0.0123111
NCAPD2	-0.511416	-0.511527	6.55389	0.000914998	0.0126232
ACP7	-3.88241	-4.28829	1.13708	0.000925463	0.0127528
VEGFC	0.569454	0.56974	6.05423	0.000929132	0.0127887
NUP107	-0.701138	-0.701599	5.16767	0.000933553	0.0128283
LAMB1	-0.446223	-0.446275	8.1061	0.000934154	0.0128283
ME3	-0.887413	-0.889009	4.30275	0.000939009	0.0128801
HYOU1	-0.459059	-0.459118	7.77148	0.000943989	0.0129273
LIMS2	0.600537	0.600901	5.77621	0.000944607	0.0129273
SLC9A3R2	-0.486814	-0.486866	8.04372	0.000950546	0.0129937
NR2F2	-0.436056	-0.436096	8.21676	0.000960646	0.0131168
WDR91	-1.07901	-1.08213	3.39936	0.00096344	0.0131399
PCDHGB3	2.11591	2.14524	1.83951	0.00096585	0.0131578
ITGA10	0.695236	0.695737	5.08801	0.000971452	0.013219
SELENOM	0.588921	0.589225	6.11681	0.000983026	0.0133613
ITGB1	0.391525	0.39153	10.9929	0.000985111	0.0133745
TEDC2	-1.36594	-1.37134	2.48592	0.000993267	0.0134699
RSPH3	0.718985	0.719762	5.08424	0.00100188	0.0135713
PEG10	-0.421691	-0.421779	11.9217	0.00100521	0.013601
FIBCD1	-1.23584	-1.24066	3.33481	0.00101678	0.013742
PAOX	1.78398	1.80433	2.01787	0.00102492	0.0138365
PEX11B	0.740848	0.741736	4.65695	0.00103702	0.013984
PARP1	-0.462063	-0.462151	7.48491	0.00103897	0.0139945
TROAP	-0.870014	-0.87132	3.71401	0.00104322	0.0140359
RHOQ	0.521359	0.52154	6.58169	0.00106113	0.0142609
ARL4A	-1.0094	-1.0122	3.58173	0.00108357	0.0145461
ADCY6	0.552116	0.552353	6.65531	0.00109287	0.0146545
FBL	-0.570162	-0.570405	5.94389	0.00109986	0.0147317
LRRC15	-1.88896	-1.91036	1.68098	0.0011096	0.0148325
PSG2	0.957788	0.959563	3.49755	0.00110987	0.0148325
ZKSCAN8	0.635782	0.63619	5.6541	0.00112252	0.0149849
FGFRL1	0.767176	0.768365	4.53005	0.00112454	0.0149951
POLD1	-0.691051	-0.691638	4.86623	0.00113328	0.0150949
KIF18A	-0.85527	-0.856365	3.87856	0.00114092	0.0151796
BAHD1	0.717588	0.718438	4.72579	0.00115765	0.0153851
DEPDC1	-0.605669	-0.605898	5.48093	0.00116161	0.0154207
GGH	-0.518228	-0.518353	6.53328	0.00116429	0.0154391
PRKACB	-0.516814	-0.517058	6.81822	0.00122707	0.0162536
MDK	0.554913	0.555124	6.79935	0.00122902	0.0162614
NCL	-0.425061	-0.425082	9.19992	0.00124089	0.0164003
GINS1	-0.832224	-0.833211	3.98124	0.00124495	0.0164358
SARM1	1.65446	1.66872	2.15041	0.00125757	0.0165841
TRIP13	-0.670902	-0.671306	4.98198	0.00128182	0.0168853
ZDHHC12	-0.819666	-0.820783	4.4295	0.00128701	0.016935
ADSSL1	5.25987	1.44269e+08	0.633613	0.00131036	0.0172233
ARHGAP33	-1.19965	-1.20389	2.80332	0.00131566	0.017274
SPTLC3	-1.19863	-1.2028	3.21443	0.00132039	0.017317
FAM131C	3.43224	3.62796	1.1104	0.00133026	0.0174274
TRIQK	0.995341	0.997598	3.68312	0.00133384	0.0174552
STAT3	0.491406	0.491534	7.21877	0.0013366	0.0174722
ADAMTS3	-1.89508	-1.91539	1.83732	0.00135008	0.0176292
EXOSC6	-0.813054	-0.814241	4.86084	0.00135845	0.0177191
ETHE1	0.853214	0.854975	3.99397	0.00136422	0.017775
RAP2B	-0.700233	-0.70085	4.86663	0.00138461	0.018021
PADI1	2.48979	2.53651	0.811286	0.00139963	0.0181967
FERMT2	0.454493	0.454555	7.71196	0.00140581	0.0182572
ODR4	0.744466	0.745308	5.0569	0.00140775	0.0182625
GJA1	1.89189	1.9158	1.46023	0.00141328	0.0183144
CMIP	0.644658	0.645182	5.52584	0.00141604	0.0183153
ELFN2	2.24507	2.28503	0.985351	0.00141641	0.0183153
FANCG	-0.815156	-0.816122	4.04871	0.00142493	0.0184052
PUDP	-0.817364	-0.818684	4.16787	0.00142644	0.0184052
SGO2	-0.695963	-0.696451	4.63588	0.00143138	0.0184491
BUB3	-0.425469	-0.42551	7.97074	0.00144716	0.0186324
GDNF	1.06627	1.06859	3.23757	0.00145531	0.0187171
PLK4	-0.788188	-0.789033	4.1191	0.00146413	0.0188104
H2AFY2	1.66128	1.677	1.97661	0.00148565	0.0190664
MAD2L1	-0.675794	-0.676197	5.10513	0.00149682	0.0191687
SMC1A	-0.482723	-0.482822	6.89938	0.00149683	0.0191687
KIF14	-0.652443	-0.652828	4.88843	0.00150134	0.019206
GOLGA5	0.532941	0.533197	6.48257	0.00151181	0.0193192
PCDHB9	2.1242	2.1562	1.45878	0.00152553	0.0194737
S1PR1	0.63077	0.631452	6.69749	0.00154576	0.019711
AHR	0.483511	0.483608	7.0818	0.00155799	0.0198458
SH3BP1	-0.851205	-0.853236	4.28195	0.00157349	0.0200163
PIMREG	-0.722122	-0.722859	4.37959	0.00157473	0.0200163
BTBD19	0.66402	0.664602	5.10612	0.00157827	0.02004
SH3BGRL2	0.68267	0.683328	4.88179	0.0015874	0.0201346
CBLB	0.610672	0.611399	6.50965	0.00159457	0.0202041
SLC25A37	-0.476525	-0.47664	6.72927	0.00160842	0.0203579
NR3C2	-2.27755	-2.33359	1.79136	0.00162128	0.020499
TPM1-AS	1.25741	1.26299	3.10202	0.00162699	0.0205495
PGM2L1	0.894268	0.895663	3.74527	0.0016338	0.0206139
IRS2	0.523358	0.52358	6.4906	0.00164516	0.0207213
RAB11FIP1	0.877791	0.879512	4.28023	0.00164578	0.0207213
MT-ND4	0.555428	0.555432	12.0956	0.00168177	0.0211522
MR1	0.572173	0.572529	6.04426	0.00169197	0.021258
SYNGR2	0.678457	0.679295	5.96282	0.00171638	0.0215221
CHAF1A	-0.670818	-0.671273	4.90565	0.00171659	0.0215221
C18orf54	-0.826937	-0.827967	4.13368	0.00172085	0.021553
PGGHG	0.674153	0.674835	5.47225	0.0017369	0.0217312
ADK	-0.601962	-0.602391	5.3515	0.00173992	0.0217463
ZNF529	1.03017	1.03308	3.68839	0.00174325	0.0217651
CNTN5	-1.71955	-1.73784	1.78983	0.00174565	0.0217724
ATAD2	-0.535199	-0.535399	5.9051	0.00175473	0.0218629
IL1RAP	0.696745	0.697463	4.92696	0.00176104	0.0219187
CYB5R3	0.397546	0.397563	9.21283	0.00176694	0.0219643
IFRD2	-0.562625	-0.562933	5.91834	0.0017689	0.0219643
CCDC18	-0.924427	-0.926227	3.3145	0.00177022	0.0219643
TSC22D1	0.574636	0.574955	5.65615	0.00177653	0.0220197
NEK2	-0.762737	-0.763518	4.2225	0.00178895	0.0221507
TCF21	0.753688	0.755084	4.58032	0.00180244	0.0222874
PSAP	0.396827	0.396844	10.0763	0.00180372	0.0222874
TNFRSF10B	0.428052	0.428118	8.31841	0.0018167	0.0224247
ZNF680	1.66552	1.68126	1.90095	0.00182813	0.0225425
PM20D2	-0.574344	-0.574574	5.49975	0.00183757	0.0226356
NRGN	-1.15087	-1.15404	2.9592	0.001847	0.0227059
TEK	0.61712	0.617502	5.21651	0.00184707	0.0227059
SLC43A2	1.32018	1.32661	2.43665	0.00186469	0.0228989
GNAS	0.39376	0.393775	9.73495	0.00186932	0.0229323
RETREG3	0.534335	0.53457	6.08003	0.00187494	0.0229776
ARSA	0.631655	0.632246	5.28294	0.00189801	0.0232365
TP53INP2	0.493793	0.493919	6.68195	0.00191139	0.0233765
FANCI	-0.61016	-0.610468	5.27242	0.00191371	0.0233782
ALDH2	1.36963	1.38047	2.7814	0.00191614	0.0233782
ABHD4	0.553265	0.553525	5.81413	0.0019174	0.0233782
PPP1R13B	1.48989	1.50085	2.44923	0.00195007	0.0237523
TTC3	0.403528	0.403559	8.69393	0.00196484	0.0239078
SMARCA1	0.481342	0.481472	6.76579	0.00198511	0.0241299
OBSL1	0.556999	0.557228	6.05972	0.00199494	0.0242248
LATS2	0.487249	0.487388	6.94629	0.00202893	0.0246126
ACTL6A	-0.628488	-0.628925	5.30906	0.00204069	0.0247302
ERMN	2.78478	2.88026	0.242316	0.00205513	0.02488
FBXO44	-5.02778	-1.44269e+08	1.37464	0.00207819	0.0251248
HPS4	-0.666116	-0.666776	5.23833	0.00207956	0.0251248
C17orf53	-1.27522	-1.28022	2.35281	0.00208477	0.0251493
GSDMB	0.883665	0.88589	4.08592	0.00208579	0.0251493
TTLL3	0.735414	0.736491	4.62696	0.00209405	0.0251733
ATL1	2.20067	2.25136	1.14028	0.00209492	0.0251733
NME4	0.487793	0.487945	6.48859	0.00209507	0.0251733
NET1	-0.864943	-0.866432	3.98046	0.0020962	0.0251733
CDC25A	-0.982908	-0.984846	3.58869	0.00209905	0.0251822
TBC1D31	-1.07788	-1.08149	3.1666	0.0021102	0.0252906
USP5	-0.471171	-0.471284	6.93442	0.00212053	0.025389
LIMK2	0.604742	0.605177	5.35084	0.00212402	0.0254002
STARD7-AS1	-1.95505	-1.99197	1.86604	0.00212638	0.0254002
ORC5	-0.895191	-0.897293	3.86649	0.00212783	0.0254002
ENG	-0.431187	-0.43124	8.07116	0.00215141	0.0256561
RECQL4	-0.794409	-0.79528	4.24643	0.00215869	0.0257172
HSPB1	0.40627	0.406294	8.76947	0.00217342	0.025867
INSIG1	-0.411572	-0.411604	8.01311	0.00219811	0.0261347
HPSE	-2.66177	-2.79627	1.73351	0.00220617	0.0262046
RFC2	-0.721439	-0.722318	4.23913	0.00221557	0.0262901
PLEKHG2	0.602737	0.603143	5.38925	0.00223107	0.0264478
UBE2H	0.448217	0.448294	7.66714	0.00224178	0.0265484
MFHAS1	-1.02606	-1.03033	4.12725	0.00224813	0.0265974
PPP4R1L	1.11667	1.12145	2.9102	0.00227656	0.0269071
NIPAL2	0.55261	0.55291	5.81826	0.00227906	0.02691
APBB3	0.951948	0.954671	3.92931	0.00228259	0.0269251
DYNC1I1	2.36301	2.41524	0.995098	0.00228613	0.0269402
ERCC6L	-0.937024	-0.938634	3.34527	0.00229032	0.0269632
ARSJ	0.453641	0.453702	7.16978	0.00233706	0.0274863
KNSTRN	-0.654978	-0.655598	4.76848	0.00235614	0.0276835
MMS22L	-0.688434	-0.68898	4.70261	0.00236273	0.0277015
CARD10	-0.664234	-0.664989	5.14941	0.0023631	0.0277015
ABI3	-1.75288	-1.7779	2.28867	0.00236462	0.0277015
SNHG20	2.18851	2.23291	1.50488	0.0023795	0.0278485
CENPQ	-1.03472	-1.03749	3.28698	0.00240884	0.0281644
INO80C	-0.964041	-0.966537	3.55564	0.00241493	0.0282079
GYS1	0.530599	0.530787	6.2305	0.00241966	0.0282357
PGP	-0.672347	-0.672938	4.71178	0.00242352	0.0282532
CBX5	-0.424159	-0.424199	8.06929	0.00244122	0.0284318
CDKN2C	-0.605743	-0.606267	5.58285	0.002449	0.0284947
LOXL2	0.396679	0.396693	8.98782	0.00246538	0.0286573
ARSB	0.529768	0.529995	6.15953	0.00247953	0.0287938
EXO1	-0.881722	-0.883374	3.41219	0.00250497	0.0290365
CCDC81	2.20051	2.24504	1.1914	0.00250528	0.0290365
ZNF605	0.820593	0.822496	4.01358	0.00255218	0.0295415
GRWD1	-0.585128	-0.585541	5.55263	0.00255379	0.0295415
FAM155A	1.16221	1.16752	2.81434	0.00255777	0.0295589
POP1	-0.784622	-0.785661	4.08076	0.00256257	0.0295858
OR2A1-AS1	2.42648	2.49984	1.04168	0.00256936	0.0296356
PLPPR2	0.514492	0.514714	6.4108	0.00257383	0.0296585
WDTC1	0.491104	0.491267	6.43402	0.00258061	0.029708
FOXO4	1.14402	1.14854	3.47391	0.00258447	0.0297239
RBBP8	-0.627576	-0.628181	5.11624	0.00259195	0.0297813
HDAC11	1.58424	1.59757	2.00538	0.00261422	0.0300083
MACROD2	-3.26007	-3.46904	0.480375	0.00262545	0.0301083
PRAF2	0.72714	0.728084	4.94781	0.00263096	0.0301426
SLCO3A1	1.53435	1.5444	1.97664	0.00264803	0.0303092
SSX2IP	-1.11376	-1.11895	3.40117	0.00265806	0.0303949
CRTC1	0.866398	0.868583	4.37428	0.00266557	0.0304517
ATP5MC1	-0.578934	-0.57933	5.5059	0.0026747	0.0305267
INSR	0.675669	0.676358	4.83123	0.00268705	0.0306386
TMEM132B	1.4121	1.42137	2.19525	0.00271983	0.0309827
SIGLEC22P	3.21078	3.40338	1.17285	0.00274603	0.0312514
GPR156	5.25597	1.44269e+08	0.763486	0.0027651	0.0314153
SIAE	0.710722	0.711674	4.75519	0.00276568	0.0314153
SPRY1	1.78518	1.81225	2.19549	0.00277201	0.0314573
OIP5	-1.62777	-1.6419	1.60926	0.00277952	0.0315126
RRM2B	0.459531	0.459665	7.79253	0.00278531	0.0315484
RNU6-1	0.592094	0.592636	5.86695	0.00279161	0.0315898
KRT18	-0.437674	-0.437749	7.29069	0.00281615	0.0318374
EXOSC5	-1.03378	-1.03773	3.45306	0.00282148	0.0318675
UBE2T	-0.735826	-0.736694	4.08246	0.00283743	0.0320175
SLC25A15	-1.22516	-1.23362	3.28949	0.00284838	0.0321107
TTK	-0.705998	-0.706625	4.45196	0.00289561	0.0326124
PBXIP1	0.60582	0.606316	5.48848	0.00290828	0.0326945
CCT8	-0.427633	-0.427694	7.75482	0.00290837	0.0326945
CDC7	-0.927958	-0.930325	3.35906	0.00291586	0.032748
HIST2H2BE	1.46862	1.47953	2.79071	0.00292163	0.032782
VPS13D	0.482173	0.482285	6.92694	0.0029435	0.0329964
FOXN3	0.503077	0.503281	6.32262	0.00295149	0.0330551
HMGCL	0.55918	0.55983	8.29023	0.00296741	0.0332022
SVIP	-0.794206	-0.795857	4.07185	0.00297644	0.0332721
SEMA3F	1.11236	1.11908	4.36357	0.00298309	0.0333153
CDH2	0.449251	0.449359	7.35605	0.0029871	0.0333266
FBXO5	-0.69043	-0.691069	4.56833	0.00298967	0.0333266
ME2	-0.542133	-0.542492	5.85243	0.00302431	0.0336814
ORMDL3	0.625521	0.626066	5.38249	0.00306043	0.0340275
BGN	4.58336	1.44269e+08	2.80862	0.00306108	0.0340275
CORO6	1.83363	1.85561	1.35963	0.00307495	0.0341499
KIF18B	-0.696727	-0.697303	4.55184	0.0030857	0.0341953
LAYN	0.506261	0.506454	6.26139	0.00309049	0.0341953
KLF13	0.517474	0.517698	5.96209	0.00309173	0.0341953
HOOK2	0.940489	0.943286	3.76478	0.00309464	0.0341953
MT-ATP8	0.556074	0.556108	9.2104	0.00309591	0.0341953
HMGB1P6	-1.49328	-1.50226	2.15023	0.00309619	0.0341953
B3GALNT1	-0.737601	-0.73863	4.30639	0.0031051	0.0342621
TFAM	-0.602566	-0.603023	5.20395	0.00310845	0.0342675
MVD	-0.540628	-0.540846	5.60858	0.00312485	0.0344165
COA4	-0.655276	-0.655891	5.10839	0.00313032	0.0344451
CRY1	-0.634454	-0.635029	4.8981	0.0031338	0.0344516
BIRC5	-0.733026	-0.733814	4.1259	0.00314595	0.0345245
XRCC5	-0.399037	-0.399071	8.34021	0.0031462	0.0345245
GUCY1B1	-1.71059	-1.72506	1.58987	0.00316192	0.0346652
KCNQ1OT1	0.675899	0.676606	4.59073	0.00319407	0.0349856
BUB1B	-0.615981	-0.61641	4.76628	0.00323053	0.0353525
HAPLN3	1.02621	1.02951	3.40885	0.00324908	0.0355149
TCTEX1D1	-2.05555	-2.08694	1.46123	0.0032513	0.0355149
INTS13	-0.559423	-0.559831	5.55082	0.00327842	0.0357784
LHX4	-1.64076	-1.65618	1.6984	0.00328777	0.0358117
ACSL4	-0.423402	-0.42345	7.89141	0.00328908	0.0358117
NAA15	-0.466491	-0.466612	6.82397	0.00329045	0.0358117
MSRA	1.62634	1.64577	2.69111	0.00330724	0.0359272
PTN	0.525521	0.525688	5.77013	0.00330877	0.0359272
TMEM45A	0.626242	0.626727	5.20088	0.00331007	0.0359272
FOPNL	-0.567196	-0.567531	5.56305	0.00331449	0.0359426
ARSD	0.691201	0.692198	4.69297	0.0033345	0.0361268
CCL2	0.568725	0.568955	5.6422	0.00337066	0.0364855
SPOCK3	-2.31775	-2.374	0.439531	0.00337971	0.0365504
BMPR1B	-2.15221	-2.19996	1.27248	0.0033914	0.0366437
RAN	-0.391602	-0.391628	8.65209	0.00340757	0.0367851
TARSL2	0.778718	0.780259	4.04966	0.00343828	0.0370832
LZTFL1	0.741126	0.74215	4.41165	0.00348718	0.0375767
OSBPL3	0.537997	0.538255	5.79818	0.00352015	0.0378979
PASK	-1.08885	-1.09217	2.94684	0.00352389	0.037904
TM6SF2	3.67632	4.04947	0.796116	0.00355552	0.0382099
PGBD1	-0.91041	-0.912611	3.40196	0.00357784	0.0383761
SAMD9L	0.471741	0.471959	7.60131	0.00357803	0.0383761
MRPS26	-0.735358	-0.736365	4.62666	0.00358342	0.0383761
LHFPL6	0.452077	0.452147	7.10303	0.00358382	0.0383761
YEATS2	0.491324	0.491504	6.37359	0.00359389	0.038437
SLC2A9	1.93242	1.98031	2.12434	0.00359593	0.038437
ISOC1	-0.702954	-0.704136	4.50463	0.00361265	0.0385812
KCTD11	0.745648	0.7469	4.32518	0.00364335	0.0388743
ZFHX3	0.449387	0.449492	7.18481	0.00365814	0.0389973
ATP10A	1.57993	1.59383	1.61441	0.00367063	0.0390905
SLC45A1	2.01253	2.05528	1.68124	0.00367341	0.0390905
MAP1LC3A	0.58625	0.586648	5.52523	0.00369533	0.0392873
FAM8A1	0.554104	0.554433	5.83154	0.00369848	0.0392873
SRGAP1	0.496124	0.49633	6.3662	0.00370213	0.0392912
CYB5R2	0.799033	0.800962	4.01658	0.00371876	0.0394327
FBN1	0.368483	0.368487	11.2001	0.00373998	0.0395709
FAS	0.553845	0.55427	5.75396	0.00374019	0.0395709
COQ2	-0.847999	-0.84976	3.67994	0.00374172	0.0395709
SDF2L1	-0.690296	-0.690966	4.41738	0.00374919	0.0396149
C21orf58	-0.926258	-0.928213	3.207	0.00376854	0.039768
SNHG14	0.738599	0.739882	4.46733	0.00377112	0.039768
PUS7	-0.726121	-0.727155	4.33211	0.00377365	0.039768
VGLL4	0.688735	0.689773	4.81292	0.00378578	0.0398607
PSMG1	-0.620942	-0.621596	4.9471	0.00379453	0.0398928
SGTB	0.499832	0.500041	6.24617	0.00379551	0.0398928
CEP128	-0.874495	-0.876414	3.38438	0.00380142	0.0399199
LDHB	-0.395588	-0.39561	9.22028	0.00382125	0.0400929
VAMP2	0.568671	0.569102	5.56797	0.00384206	0.040276
CDA	0.798748	0.800006	3.58968	0.00385287	0.0403539
MYO1D	0.498131	0.498317	6.29795	0.00386559	0.0404518
GGCT	-0.739763	-0.741162	4.15569	0.00387195	0.0404829
SLC38A7	0.653369	0.654003	5.04867	0.00388034	0.0405352
CCDC102A	0.793515	0.795202	4.64194	0.0038932	0.040634
CCNB2	-0.654861	-0.655375	4.65463	0.00390836	0.0407566
HBP1	0.702171	0.702894	4.78091	0.00391576	0.0407983
EEFSEC	-0.806021	-0.808007	3.78195	0.0039256	0.0408287
CHCHD1	-0.65503	-0.655677	4.87779	0.00392887	0.0408287
TNFAIP1	0.493174	0.493353	6.31021	0.00392892	0.0408287
GPSM2	-0.596833	-0.597367	4.97756	0.0039678	0.0411969
TBCEL	0.592229	0.592773	5.126	0.0039761	0.041213
PDE4C	2.4274	2.50076	0.765602	0.00397624	0.041213
LAMA3	1.77399	1.79429	1.47397	0.00398229	0.04124
TMEM106C	-0.581909	-0.58228	5.24543	0.00398794	0.0412628
NPHP3	0.500748	0.501007	6.18223	0.004004	0.0413932
CSNK2B	1.44961	1.4623	1.93589	0.00402197	0.0415203
CRCP	-0.561872	-0.562249	5.33395	0.00402632	0.0415203
LDLR	-0.396638	-0.39667	8.11836	0.00402671	0.0415203
KIFC1	-0.80231	-0.803334	3.78238	0.00403372	0.0415567
SNRPA	-0.554028	-0.554378	5.38354	0.00406409	0.0418109
GINS4	-0.983723	-0.985712	3.27196	0.00406539	0.0418109
PHLDB3	1.07237	1.07909	3.64809	0.00407393	0.0418627
IFT140	0.681537	0.68248	4.53818	0.00411772	0.0422585
RPS27L	0.457472	0.457593	7.33666	0.00411951	0.0422585
TMUB2	0.594252	0.594746	5.05196	0.00415444	0.0425804
CNTNAP3B	1.43445	1.44382	1.67025	0.00415915	0.0425921
OPLAH	1.13457	1.14099	2.98335	0.0041711	0.042678
COL5A2	0.385154	0.385172	9.17622	0.00417946	0.0427269
TUBB4B	-0.386279	-0.386302	8.75402	0.00418427	0.0427395
AKAP1	-0.63846	-0.639172	4.6406	0.00421647	0.0430317
NUP85	-0.64101	-0.641649	4.70618	0.00422881	0.0431111
ICAM1	1.54067	1.56384	3.32388	0.00423145	0.0431111
RBL1	-0.729082	-0.729935	4.13374	0.00427113	0.0434782
MND1	-1.58237	-1.5935	1.77709	0.00433226	0.0440333
LSM4	-0.492444	-0.492615	6.18129	0.00433301	0.0440333
F3	-0.555301	-0.555533	5.36107	0.00433884	0.0440551
LIG1	-0.664175	-0.66479	4.62006	0.0043543	0.0441745
TNFRSF14	0.988751	0.992116	3.32358	0.0043707	0.0443034
BMT2	0.703332	0.704352	4.27772	0.00440629	0.0446263
AKR1B1	-0.476207	-0.476347	6.68524	0.00442289	0.0447565
STAT5A	1.24085	1.24767	2.25576	0.00445128	0.0450057
PERP	0.46899	0.469132	6.46213	0.00446974	0.0451542
ZNF778	-1.71639	-1.74115	1.96646	0.00452794	0.0457036
LRP10	0.38978	0.389803	8.92843	0.00455876	0.0459758
GRAMD2B	0.722895	0.724118	4.30394	0.00457642	0.0461151
ALYREF	-0.539254	-0.539562	5.41495	0.00459709	0.0462844
GLRX3	-0.475331	-0.47551	6.49026	0.0046109	0.0463843
HMGN2	-0.427685	-0.427752	7.32868	0.00462901	0.0465274
PHIP	-0.434152	-0.434244	6.96592	0.00463546	0.0465531
GNG2	-0.772681	-0.773931	3.86218	0.00467728	0.0469337
LINC00517	-1.13038	-1.13979	4.70853	0.00470868	0.0472092
MOK	0.456344	0.456467	6.81573	0.00471264	0.0472093
CLCN4	-1.86682	-1.89965	1.81329	0.00472454	0.0472352
NUP35	-0.955639	-0.958366	3.18046	0.0047249	0.0472352
SEMA4G	1.56871	1.58776	2.08695	0.00472708	0.0472352
MME	-0.571506	-0.571929	5.09674	0.00473928	0.0473019
CAMK2D	0.427662	0.427748	7.03632	0.0047444	0.0473019
AP1G2	0.821138	0.823337	3.89755	0.00474723	0.0473019
JHY	3.08074	3.27128	0.634553	0.00474957	0.0473019
FBXL7	-0.688226	-0.689153	4.39792	0.00478514	0.0476165
CPT1C	0.690038	0.691113	4.42097	0.00479451	0.0476701
MUC1	2.20337	2.26236	1.3793	0.00481957	0.0478794
ULK1	0.528027	0.528381	5.78399	0.00483805	0.0479831
IFIT1	1.05149	1.0567	4.15315	0.00483866	0.0479831
CALCOCO2	0.424425	0.424506	7.22237	0.00484335	0.0479831
TRMU	-0.612575	-0.613136	4.81569	0.00484605	0.0479831
POLR1E	-0.608326	-0.608926	4.89281	0.00488793	0.0483578
ERBB3	1.95773	1.99535	1.71356	0.0049123	0.0484783
FDPS	-0.460725	-0.460846	6.50297	0.00491508	0.0484783
ZNF217	0.523705	0.52395	5.77221	0.00491581	0.0484783
DIAPH1	-0.404248	-0.404294	7.96873	0.00491632	0.0484783
LZTS1	-0.872525	-0.875467	3.97425	0.00493521	0.0486244
ADAMTS6	0.43095	0.431025	7.33711	0.0049658	0.0488856
MBP	1.27732	1.28283	2.19456	0.00498082	0.0489931
RBFA	-0.836461	-0.838778	3.516	0.00499527	0.0490948
TCEAL4	0.50211	0.502328	5.91174	0.00499992	0.0491002
LINC02475	0.768911	0.770766	4.12683	0.00500947	0.0491536
LRFN4	-0.668977	-0.669908	4.62594	0.00504359	0.0494479
TMEFF2	-1.1056	-1.1118	3.24275	0.00507358	0.0497011
MZT1	-0.539012	-0.539288	5.5497	0.00511799	0.050057
BCCIP	-0.54455	-0.544869	5.55728	0.00511828	0.050057
LYN	-0.895793	-0.898664	3.79141	0.00512768	0.0500678
ITGB5	0.399498	0.399531	7.95153	0.00512775	0.0500678
ZNF490	3.14313	3.33474	0.693691	0.00514253	0.0501711
DACT1	2.23295	2.28403	0.611414	0.00514962	0.0501994
FAM171A2	1.17472	1.1807	2.57074	0.0051655	0.0503131
WDR76	-0.707169	-0.707959	4.27964	0.00519035	0.0505141
NDC80	-0.739142	-0.739776	4.41106	0.00520023	0.0505514
ZDHHC1	0.977597	0.982766	3.52906	0.00520682	0.0505514
SERINC3	0.389514	0.389546	8.35331	0.00520687	0.0505514
DNPH1	-0.634036	-0.634777	4.86651	0.00522251	0.0506241
ZNF652	0.710841	0.711891	4.25811	0.00522282	0.0506241
BCL6	0.682725	0.68391	4.74846	0.00524699	0.050778
KDM1B	0.569491	0.569939	5.3126	0.00524718	0.050778
CEP152	-0.683985	-0.6848	4.61756	0.00527678	0.0509832
MCUB	-1.06248	-1.06559	3.18808	0.00527692	0.0509832
SH3BGRL	0.438487	0.438578	7.05207	0.005297	0.051136
PPARA	0.544287	0.544633	5.66644	0.00530897	0.0512102
TYMS	-0.596868	-0.597348	4.91297	0.0053574	0.0516357
S1PR3	-0.513517	-0.513745	5.76874	0.00539534	0.0519331
HDAC2	-0.437235	-0.437332	7.04872	0.00539694	0.0519331
LRR1	-0.893989	-0.896362	3.23214	0.00541543	0.0520676
ZNF385A	0.855906	0.858258	3.90601	0.00542328	0.0520676
MTERF3	-0.760098	-0.76168	3.85369	0.00542727	0.0520676
PLXNA3	0.434904	0.435001	7.24408	0.00543019	0.0520676
MYBL2	-0.663299	-0.663917	4.43683	0.00543269	0.0520676
ZNF239	-1.28639	-1.29399	2.50743	0.00546499	0.052323
C1QBP	-0.44915	-0.449281	6.72424	0.00546808	0.052323
ATRIP	-0.903647	-0.90622	3.35039	0.00550408	0.0526019
TMEM117	0.873418	0.876456	3.51559	0.00550603	0.0526019
GOPC	0.433196	0.433277	7.0103	0.00552335	0.0527253
DYRK4	0.967426	0.970518	3.2008	0.00555017	0.0529391
DCUN1D3	0.60362	0.604248	5.27127	0.00558355	0.053215
DLGAP1-AS2	1.50152	1.51893	2.35324	0.00562716	0.053588
TCP1	-0.409187	-0.409236	7.84888	0.00563214	0.0535927
MVK	-0.60974	-0.610258	4.73414	0.00573127	0.0544502
HIST1H2AC	1.00677	1.0095	2.96949	0.00573416	0.0544502
INTS14	-0.647726	-0.648533	4.84102	0.00573591	0.0544502
MFSD2A	-1.03188	-1.03664	3.08669	0.00577584	0.0547858
ELOVL6	-0.543561	-0.54389	5.59955	0.0057881	0.0548585
TUBA4A	-1.27603	-1.28732	2.68116	0.00581854	0.0550629
NAV1	0.391239	0.391268	8.2204	0.00581887	0.0550629
PSRC1	-0.659482	-0.660161	4.27451	0.00583887	0.0552085
ACAT2	-0.55471	-0.554954	5.23373	0.00590328	0.0557734
KDM5B	0.443483	0.443622	6.80594	0.00591339	0.0558063
UQCC3	-1.06241	-1.06746	2.90856	0.00591609	0.0558063
CYTH3	0.470692	0.470841	6.22591	0.00598797	0.0564398
PLPP7	2.62616	2.74981	1.04902	0.00601978	0.056695
CHCHD3	-0.528461	-0.52878	5.79305	0.00602858	0.0567176
RRAS	0.409115	0.409189	7.37294	0.00603167	0.0567176
EGFL7	-1.68369	-1.71223	2.47775	0.00604126	0.0567632
UTP18	-0.568008	-0.568424	5.26994	0.00605349	0.0568334
ZNF528-AS1	1.20746	1.21434	2.6558	0.00608601	0.0570939
SNRPF	-0.600982	-0.601553	4.80705	0.00610284	0.0572069
ESCO2	-0.953595	-0.955621	3.11908	0.00610959	0.0572254
FSCN1	0.384013	0.384034	8.84309	0.00613845	0.0574507
AKAP13	0.491424	0.49166	6.20701	0.00616906	0.057692
NUAK1	0.67905	0.68008	4.27568	0.00621922	0.0581157
DUT	-0.487568	-0.487759	6.06501	0.00623827	0.0582482
SPOCK1	1.02667	1.03118	3.03089	0.00625105	0.058322
LSM5	-0.635734	-0.636514	4.52051	0.00629906	0.0587242
ZNF415	1.10452	1.10977	2.76366	0.0063356	0.0590188
GADD45B	0.488818	0.488976	5.88744	0.00637679	0.0593562
IGF2-AS	1.07636	1.08309	3.28594	0.00641025	0.0596213
NARS2	-0.785728	-0.787408	3.93853	0.00642082	0.0596732
ASIC1	1.89768	1.93924	1.68609	0.00646661	0.0600521
MAML3	1.80543	1.83269	1.4573	0.00647868	0.0601176
ZNF14	1.7253	1.75191	1.62908	0.00648972	0.0601569
OXTR	0.665959	0.666732	3.92752	0.00649298	0.0601569
MAPK8	-0.517205	-0.517485	5.51286	0.00650311	0.0602041
GCLM	-0.43589	-0.435979	6.57919	0.00653498	0.0604523
RAB3B	0.388157	0.388183	8.40726	0.00659439	0.0609548
MAGI2	0.969085	0.973036	3.18648	0.0066196	0.0611405
PACSIN3	0.543515	0.54384	5.33032	0.0066259	0.0611515
DCTPP1	-0.701643	-0.702783	4.0656	0.0066518	0.0613433
BNIP3P4	-2.17226	-2.24855	1.55699	0.00665747	0.0613482
KIAA1217	0.517935	0.518264	5.77056	0.00666515	0.0613717
WDR60	0.601059	0.601678	4.83628	0.00670748	0.0617139
EDNRA	0.549034	0.549822	7.10225	0.00674333	0.0619961
IPO5	-0.373074	-0.373097	8.96891	0.00681224	0.0625816
SEL1L3	0.620376	0.621472	5.2411	0.00682662	0.0626656
CDK4	-0.528806	-0.52917	5.43092	0.00684997	0.0628317
2020-09-05	0.582454	0.583063	4.98342	0.00686483	0.0629198
FSTL1	0.351128	0.351133	10.9413	0.00689086	0.0630732
INPPL1	0.398002	0.398057	7.80163	0.00689698	0.0630732
OSBPL2	0.563938	0.56439	5.35387	0.0068974	0.0630732
PIGH	-1.42315	-1.43743	2.25581	0.00690927	0.063103
NGDN	-0.780314	-0.782134	3.7617	0.00691121	0.063103
SLC46A3	0.713438	0.714458	3.84399	0.00694895	0.0633993
SAT1	0.469767	0.469989	6.46351	0.00697529	0.0635728
SPHK1	-0.538847	-0.539266	5.74395	0.0069786	0.0635728
HSP90AA1	-0.363763	-0.363768	10.6067	0.00700191	0.0637366
TNS4	1.39538	1.40835	1.84613	0.00703739	0.0640108
TONSL	-0.714044	-0.714792	4.45726	0.00704654	0.0640453
LUM	0.53035	0.530658	6.13986	0.00707797	0.0642822
TTBK2	0.575908	0.57654	5.15416	0.00708508	0.0642979
NDUFA4L2	3.21743	3.58008	1.47644	0.00709963	0.0643811
PXYLP1	1.00483	1.0087	3.00887	0.00710789	0.0644072
CPSF3	-0.517221	-0.517543	5.67076	0.00715924	0.0648234
TSPAN14	-0.461911	-0.462039	6.34095	0.00717434	0.064911
MGAT2	-1.00063	-1.00488	2.83624	0.00718189	0.0649302
COPZ2	0.490717	0.49097	6.05499	0.00720661	0.0651044
MTAP	-0.527824	-0.528146	5.6476	0.00724031	0.0653595
SRSF1	-0.397307	-0.397359	7.49585	0.00726523	0.065535
DOCK11	0.690482	0.691377	4.29709	0.00729701	0.065772
MATN3	0.584466	0.584945	4.90921	0.00730641	0.0657959
MAPK8IP1	2.23572	2.30676	0.573431	0.00731371	0.0657959
GIPR	2.63223	2.75589	0.671895	0.00731616	0.0657959
MAGEF1	0.796919	0.799168	3.79883	0.00738235	0.0663413
KCNN4	2.69897	2.88217	2.237	0.00742756	0.0666975
OSGEPL1	-1.03027	-1.03477	3.00859	0.00743861	0.0667466
MRTO4	-0.538525	-0.538878	5.41284	0.00745217	0.0668181
BLM	-0.940032	-0.942503	2.90316	0.00746204	0.0668565
QSOX1	-0.372896	-0.37291	9.95827	0.00748231	0.0669879
ZNF470	0.876427	0.878556	3.48324	0.00753951	0.0674496
ATF3	0.791704	0.794171	4.39758	0.0075729	0.0676977
YIPF5	0.413474	0.413551	7.31961	0.00759525	0.0678467
TRAPPC2B	1.79361	1.82616	1.5393	0.00760382	0.0678726
ZNF626	1.8682	1.8984	1.37996	0.00761971	0.0679637
SLC27A3	0.970603	0.974422	3.19362	0.00767632	0.0684176
CEP19	1.79046	1.81756	1.17478	0.00775405	0.069059
RRAGB	0.78347	0.7855	3.79265	0.00777436	0.0691883
SLC7A5	0.389368	0.389432	8.79915	0.00780451	0.069405
ESYT2	0.406472	0.406543	7.38648	0.00785186	0.0697742
CNPY4	0.752242	0.753591	3.89701	0.00786353	0.0698261
FUS	-0.398703	-0.398746	7.66732	0.00788329	0.0699496
MTFR2	-1.3714	-1.38131	1.77701	0.00791854	0.0702103
TTF2	-0.556374	-0.556784	5.09365	0.00792472	0.070213
LACTB	0.540228	0.540663	5.3929	0.00795427	0.07041
DVL1	-0.428847	-0.42894	7.38161	0.00795872	0.07041
NUP155	-0.506817	-0.507093	5.72809	0.00802148	0.0709127
LRP4	-0.816685	-0.818715	3.57709	0.00804038	0.0710273
PRIMPOL	-0.798443	-0.800551	3.61755	0.00805622	0.0710778
ADAMTS7	0.539663	0.540262	5.65508	0.00805797	0.0710778
NF2	0.408532	0.408593	7.33004	0.00808144	0.0712322
C9orf72	-1.06395	-1.06908	3.21182	0.00816358	0.0719032
CISD1	-0.640076	-0.640929	4.49128	0.00817066	0.0719126
PIGCP1	0.760382	0.762222	3.69584	0.00822169	0.0723085
MRM3	-0.807239	-0.809514	3.76536	0.00824277	0.0724407
SAMD14	-0.708472	-0.709985	4.25969	0.00824984	0.0724496
CROCCP3	1.02158	1.02583	2.9443	0.00827051	0.0725778
GNGT2	-1.9351	-1.98739	1.89017	0.00828077	0.0726146
USP46	-0.541034	-0.541436	5.50903	0.00831533	0.0728642
LINC01085	0.518271	0.518529	5.31232	0.00834168	0.0730416
GAL3ST4	1.20173	1.20987	2.48206	0.00840372	0.0735311
SLC26A2	0.475485	0.475678	5.94231	0.00842038	0.0736229
TFAP4	-1.04506	-1.04899	2.85852	0.00847228	0.0740005
HSPB11	-0.627753	-0.62852	4.47523	0.00847594	0.0740005
RIMS1	1.70437	1.74379	2.57199	0.00848531	0.0740283
NCKAP5	0.579307	0.579725	4.73892	0.00849993	0.0740856
ZNF367	-0.750252	-0.751701	3.5193	0.00850427	0.0740856
RCCD1	-0.630312	-0.631025	4.27546	0.00852351	0.0741564
SLC35B3	0.546206	0.546629	5.18022	0.0085248	0.0741564
ZNF852	2.27295	2.34454	0.914109	0.00854058	0.0742051
COL4A5	0.392138	0.392186	7.81702	0.0085428	0.0742051
EEF1E1	-0.899883	-0.903359	3.32459	0.00857377	0.0744201
VAMP1	0.823049	0.825531	3.46917	0.00860335	0.0746227
RFC3	-0.670267	-0.671102	4.07485	0.00864354	0.074917
TOM1L2	0.424939	0.425049	6.78206	0.00865696	0.0749738
HSD17B7	-1.19748	-1.20457	2.40168	0.00866264	0.0749738
PDE4DIP	0.410521	0.410613	7.62064	0.00869255	0.0751783
ACVRL1	2.69397	2.87716	0.953244	0.00871635	0.0753137
CCDC69	2.26499	2.38204	1.98376	0.00872219	0.0753137
FSD1	2.29006	2.36175	0.754055	0.00872709	0.0753137
AK5	0.496126	0.496364	5.5592	0.00875244	0.075478
TMEM198B	0.737859	0.739465	3.64842	0.00879263	0.07577
SNCAIP	-1.14007	-1.14514	2.205	0.00881853	0.0759384
RNASEH1-AS1	-1.5132	-1.52949	1.87146	0.00884002	0.0760529
NR4A1	1.43678	1.45127	2.15215	0.00884943	0.0760529
POLE3	-0.550582	-0.550969	5.30952	0.00885091	0.0760529
CCDC68	0.484287	0.484479	5.95943	0.00886016	0.0760778
TEKT4P2	2.06582	2.11519	1.19093	0.00893397	0.0766565
DMPK	0.526863	0.527221	5.62368	0.00900961	0.0772174
TANC2	0.431672	0.431778	6.89754	0.00901225	0.0772174
APEX2	-0.637534	-0.638523	4.45723	0.00906099	0.0775716
PDE7B	1.51657	1.52855	1.52306	0.00906656	0.0775716
FAM102B	-0.780146	-0.78169	3.57091	0.00907534	0.0775913
TMEM167B	0.501537	0.50181	5.86704	0.00909542	0.0777073
DHFR	-0.531944	-0.532309	4.97738	0.0091713	0.0782997
ZNF160	0.619934	0.620688	4.44812	0.00918174	0.0783329
SMIM29	-0.549876	-0.550404	5.04855	0.0091923	0.0783637
SET	-0.372463	-0.372492	8.63165	0.00919845	0.0783637
KIAA0825	1.75439	1.78363	1.92186	0.0092276	0.078472
GREM2	1.48887	1.50175	1.41997	0.00923159	0.078472
KLHL2	-0.54382	-0.544303	5.32245	0.00923621	0.078472
NUP188	-0.441148	-0.441293	6.6318	0.0092374	0.078472
FAM110A	-1.06261	-1.06786	2.50042	0.00928808	0.0788187
NLRP3	-1.00764	-1.01186	2.6858	0.00929583	0.0788187
GREB1L	1.0623	1.06802	2.82047	0.00929798	0.0788187
SCN8A	-0.605061	-0.605803	4.65018	0.00930867	0.078838
HYI	-0.865144	-0.866656	3.51285	0.00931344	0.078838
RTKN2	-2.09582	-2.1433	0.743724	0.00932182	0.0788531
APIP	-0.638179	-0.638996	4.48445	0.00936923	0.0791981
ATP6AP2	0.405405	0.405482	7.49052	0.0093997	0.0793996
NUDCD1	-0.495377	-0.495664	5.71892	0.00942461	0.0795538
MIOS	-0.543865	-0.544337	5.10312	0.00943429	0.0795794
IQCN	0.973511	0.977554	3.05459	0.00945261	0.0796777
B3GNT5	-0.83852	-0.840835	3.33708	0.00949259	0.0799583
BEST1	2.00021	2.05678	1.65595	0.00951402	0.0800825
MEIS2	-0.560162	-0.560801	5.70063	0.0095458	0.0802848
CENPN	-0.582852	-0.583429	4.62959	0.00955149	0.0802848
PWWP2B	1.00532	1.01069	3.56855	0.00958733	0.0805296
TCTN1	0.632047	0.633003	4.80815	0.00960402	0.0805593
KCTD20	0.408597	0.408681	7.08311	0.00960435	0.0805593
PTPRU	1.53932	1.56081	1.88546	0.00961322	0.0805772
NEK11	1.94503	1.99302	1.02114	0.00963422	0.0806967
TMEM184C	0.466737	0.46696	5.99622	0.00965954	0.0808151
PSMA7	-0.406586	-0.406654	7.35977	0.00966187	0.0808151
TSKU	1.66652	1.7013	2.54603	0.00970378	0.081109
RRP7A	-0.499633	-0.499921	5.76097	0.00973239	0.0812365
ETS1	-0.411774	-0.411849	7.17661	0.00973263	0.0812365
DYNLRB1	0.442374	0.442508	6.46819	0.00976931	0.0814858
TMEM102	-2.24312	-2.32034	1.31138	0.00983067	0.0819405
TMEM8B	0.798576	0.80056	3.64992	0.0098462	0.0820128
RFC5	-0.686659	-0.687851	3.69613	0.00987534	0.0821983
ZNF557	1.0022	1.00681	2.80158	0.00989011	0.082264
SULT1B1	-4.51808	-1.44269e+08	0.659154	0.00989725	0.0822662
SAE1	-0.410763	-0.410844	7.0534	0.00996912	0.082806
NCKAP5L	0.502678	0.502978	5.91487	0.0100008	0.0830114
PAQR6	2.48628	2.60764	1.52119	0.0100407	0.0832479
BDNF	0.468208	0.468429	6.06833	0.0100432	0.0832479
ZNF416	1.29596	1.30686	1.99446	0.0100733	0.0834395
PHYKPL	0.621315	0.622471	4.51562	0.0100911	0.0835288
RPS6KA1	1.88481	1.95064	3.01776	0.010133	0.0838181
N4BP1	0.500899	0.501203	5.89722	0.0101434	0.0838458
SLC25A10	-2.02837	-2.06982	0.967537	0.0101613	0.0839358
NLGN2	0.473824	0.474116	6.35571	0.0101886	0.0841022
SPTB	2.07602	2.14482	1.59439	0.0101955	0.0841022
NRM	-1.44047	-1.45175	1.74058	0.0102417	0.0844249
NPY2R	2.25034	2.33879	0.670801	0.0102672	0.0845316
AMZ1	1.15485	1.1664	3.44681	0.0102739	0.0845316
LRRCC1	-0.822818	-0.825514	3.61791	0.0102758	0.0845316
HSD3B7	1.03977	1.04442	2.74586	0.0102914	0.0845465
TMEM120A	0.597501	0.598229	4.73621	0.0102963	0.0845465
H1FX	-0.447432	-0.4476	6.21833	0.0102988	0.0845465
CDC14B	0.588337	0.589138	4.86007	0.0104127	0.0854226
CXCL8	-0.444056	-0.444289	7.0924	0.0104359	0.0855008
KIAA0513	0.576015	0.576728	4.78962	0.0104365	0.0855008
EBP	-0.561068	-0.561427	4.96694	0.0104561	0.0855688
MAN2B2	0.3963	0.39637	7.38347	0.0104591	0.0855688
FAM20C	2.04073	2.12562	7.70773	0.0104826	0.0857022
FDX1	-0.553646	-0.554154	5.22389	0.0105302	0.0860327
MYDGF	-0.398848	-0.398907	7.68563	0.0105513	0.086146
NUCB1	0.399826	0.39989	7.35298	0.0106038	0.0865155
BOLA3	-0.680065	-0.681167	4.21902	0.0106258	0.0866358
C2orf68	-0.675116	-0.676446	4.08728	0.0106331	0.0866362
SIGMAR1	-0.431178	-0.431305	6.8644	0.010677	0.0869351
STAT4	2.34995	2.46864	1.08527	0.0106881	0.0869662
ZNF473	0.969825	0.973929	3.02489	0.0107089	0.0870766
MYORG	0.843045	0.845392	3.24463	0.0107228	0.0871302
HTR1F	1.24933	1.25766	2.09984	0.0107477	0.0872733
JDP2	0.582627	0.583646	5.21572	0.0107814	0.087472
SNRPB	-0.433926	-0.43405	6.44945	0.0107868	0.087472
PRSS23	-0.384324	-0.384363	7.51941	0.0107949	0.0874784
CIR1	0.551513	0.552069	5.04793	0.0108077	0.0875222
PPT1	-0.463533	-0.46376	6.31257	0.0108212	0.0875627
NCLN	-0.406967	-0.40705	7.14385	0.010829	0.0875627
SH3RF3	0.741481	0.743105	4.19304	0.0108346	0.0875627
TMEM182	1.1903	1.20205	2.93273	0.0108721	0.0877977
CDC42EP3	0.389995	0.390041	7.6891	0.0108784	0.0877977
PKP3	0.890513	0.89368	3.75392	0.0110504	0.0891262
TNNT1	1.17855	1.18571	2.25871	0.0110691	0.0892163
LRRN3	1.13705	1.14516	2.44078	0.0111109	0.0894931
WRB	0.533792	0.534126	5.21451	0.0111222	0.089524
ZIC4	1.18467	1.19297	2.39636	0.0112016	0.0901027
HYLS1	-0.749732	-0.751378	3.6386	0.0112166	0.0901626
WARS2	-0.712343	-0.713823	3.8424	0.011304	0.0908038
SLC39A11	0.68016	0.681546	4.29427	0.0113198	0.0908695
FMO5	1.66359	1.68604	1.25833	0.0114887	0.0921642
NDUFAF4	-0.627233	-0.628251	4.19428	0.0115191	0.0923138
MASTL	-0.558237	-0.55874	4.49961	0.0115228	0.0923138
PRMT6	-0.683753	-0.685149	3.91444	0.0115758	0.0926289
DCUN1D5	-0.51051	-0.510913	5.33189	0.0115841	0.0926289
PLBD2	0.448152	0.448334	6.43979	0.0115854	0.0926289
C19orf66	0.682306	0.683624	4.4431	0.0116632	0.0931204
MYO1E	0.427388	0.427511	6.8105	0.0116659	0.0931204
SASS6	-0.911394	-0.914366	2.87821	0.0116702	0.0931204
SPIN4	-0.591981	-0.592661	4.41658	0.011681	0.0931439
NEURL1B	-0.962596	-0.965809	2.55856	0.0117301	0.0933303
BTN2A2	0.699122	0.700723	4.31776	0.0117351	0.0933303
EPSTI1	0.872502	0.876777	4.1418	0.0117354	0.0933303
ITGA4	-0.425903	-0.426	6.95497	0.0117355	0.0933303
APLN	-1.78712	-1.8225	0.936585	0.0117709	0.0935491
MEG9	0.734901	0.736864	3.86616	0.0118212	0.0938865
CPQ	0.657102	0.658341	4.38804	0.0118797	0.094289
MAP2	-0.974193	-0.981664	3.70403	0.0119102	0.0944683
PCDHB8	1.90203	1.94367	0.94583	0.0119229	0.0945064
POC1A	-0.703551	-0.704765	3.75298	0.0119637	0.0947669
STK19	1.00971	1.01485	2.77	0.0119782	0.0947873
CBFA2T2	0.614192	0.61505	4.64469	0.0119821	0.0947873
TBKBP1	0.945976	0.950702	3.48055	0.0120714	0.0954303
CCDC149	0.611802	0.612671	4.6274	0.0121035	0.0956209
FRS2	0.515611	0.515968	5.4128	0.0121392	0.0958394
POLE4	-0.520114	-0.520578	5.12452	0.0121498	0.0958603
[truncated: 10,445 more rows]
